# Supplementary material for: Current status of water-related planning for climate change adaptation in the Spree River basin, Germany
Source: Copernicus journal article supplement (doi:10.5194/nhess-2024-59), 2024-04-04
Supplement: Supplementary file [file nhess-2024-59-AC2-supplement.pdf]

CLIMATE CHANGE

25/2021

# Klimawirkungs- und Risikoanalyse 2021 für Deutschland

Teilbericht 6: Integrierte Auswertung – Klimarisiken, Handlungserfordernisse und Forschungsbedarfe



CLIMATE CHANGE 25/2021

Ressortforschungsplan des Bundesministerium für  
Umwelt, Naturschutz und nukleare Sicherheit

Forschungskennzahl 3717 48 102 0

FB000574/ZW,6

## **Klimawirkungs- und Risikoanalyse 2021 für Deutschland**

Teilbericht 6: Integrierte Auswertung – Klimarisiken,  
Handlungserfordernisse und Forschungsbedarfe

von

Walter Kahlenborn, Luise Porst, Maike Voß,  
Linda Hölscher, Sabine Undorf  
adelphi, Berlin

Mareike Wolf, Konstanze Schönthaler  
Bosch & Partner, München

Alice Crespi, Kathrin Renner, Marc Zebisch, Uta Fritsch  
Eurac Research, Bozen, Italien

Inke Schauser  
Umweltbundesamt, Dessau-Roßlau

Im Auftrag des Umweltbundesamtes

## Impressum

### Herausgeber

Umweltbundesamt  
Wörlitzer Platz 1  
06844 Dessau-Roßlau  
Tel: +49 340-2103-0  
Fax: +49 340-2103-2285  
[buergerservice@uba.de](mailto:buergerservice@uba.de)  
Internet: [www.umweltbundesamt.de](http://www.umweltbundesamt.de)

[f/umweltbundesamt.de](https://www.facebook.com/umweltbundesamt.de)

[t/umweltbundesamt](https://twitter.com/umweltbundesamt)

### Durchführung der Studie:

adelphi research gemeinnützige GmbH  
Alt-Moabit 91  
10559 Berlin

Eurac Research  
Viale Druso/Drususallee 1  
39100 Bolzano/Bozen  
Italien

Bosch & Partner GmbH  
Pettenkoferstraße 24  
80336 München

### Abschlussdatum:

Juni 2021  
[Sprachliche Korrekturen und Anpassung des Abbildungstitels von  
Abbildung 24 im Oktober 2021]

### Redaktion:

Fachgebiet I 1.6 KomPass – Kompetenzzentrum Klimafolgen und  
Anpassung Dr. Inke Schauser

Publikationen als pdf:

<http://www.umweltbundesamt.de/publikationen>

ISSN 0000 0000

Dessau-Roßlau, Juni 2021

Die Verantwortung für den Inhalt dieser Veröffentlichung liegt bei den Autorinnen und Autoren.

**Kurzbeschreibung: Klimawirkungs- und Risikoanalyse 2021 für Deutschland. Teilbericht 6: Integrierte Auswertung – Klimarisiken, Handlungserfordernisse und Forschungsbedarfe**

Der vorliegende Bericht ist einer der sechs Teilberichte zur „Klimawirkungs- und Risikoanalyse 2021 für Deutschland“, die darauf abzielt, eine wesentliche Grundlage für die Weiterentwicklung der Anpassung in Deutschland zu schaffen. Dafür wurden strukturiert nach Klimawirkungen und Handlungsfeldern sowohl künftige Klimarisiken als auch Möglichkeiten der Anpassung untersucht.

Der vorliegende Teilbericht 6 beinhaltet eine integrierte Auswertung basierend auf den Inhalten aller Teilberichte. Dies umfasst eine Gesamtbetrachtung der Klimarisiken, auch im Vergleich zu den Ergebnissen der Vulnerabilitätsanalyse 2015, einen Quervergleich der klimatischen Einflüsse und Sensitivitätsfaktoren sowie die Analyse von Querverbindungen (eingehende und ausgehende Wirkbeziehungen). Außerdem werden räumliche Muster untersucht, zum einen anhand einer Typologie von Klimaraumtypen und zum anderen in Form von klimatischen Hotspot-Karten. Zudem werden die Ergebnisse der Anpassungskapazität und der Handlungserfordernisse ausgewertet. Letzteres beinhaltet auch eine Priorisierung und eine Charakterisierung der Handlungserfordernisse. Weiterhin erfolgt eine Querauswertung nach Systembereichen, wobei basierend auf der Kategorisierung aller untersuchten Klimawirkungen fünf Bereiche unterschieden werden: „Natürliche Systeme und Ressourcen“, „Naturnutzende Wirtschaftssysteme“, „Infrastrukturen und Gebäude“, „Naturferne Wirtschaftssysteme“, „Menschen und soziale Systeme“. Die Betrachtung dieser fünf Systembereiche bezieht sich auf ihre jeweiligen Betroffenheiten und die ableitbaren Handlungserfordernisse.

Überdies stellt der Teilbericht überblicksartig Forschungsbedarfe heraus, sowohl aus methodischer als auch – für die einzelnen Handlungsfelder – aus inhaltlicher Perspektive, bevor eine abschließende Schlussbetrachtung vorgenommen wird.

**Abstract: Climate impact and risk analysis 2021 for Germany. Sub-report 6: Integrated evaluation – Climate risks, needs for action, and research needs**

This report is one of the six sub-reports of the "Climate impact and risk analysis 2021 for Germany", which aims to provide an essential basis for the further development of adaptation in Germany. For this purpose, future climate risks as well as possibilities for adaptation were investigated in a structured manner according to climate impacts and fields of action.

The present sub-report 6 contains an integrated evaluation based on the contents of all sub-reports. This includes an overall consideration of climate risks, also in comparison to the results of the preceding vulnerability analysis for Germany (2015), a cross-comparison of climatic influences and sensitivity factors as well as the analysis of interdependencies (incoming and outgoing impact interactions). In addition, spatial patterns are investigated, firstly, based on a regional categorization of climate types and secondly, by developing climatic hotspot maps. Furthermore, the results of adaptation capacity and needs for action are evaluated. The latter also includes a prioritization and a characterization of the needs for action. On top of this, a cross-evaluation by system areas is carried out, whereby the following five realms are distinguished based on the categorization of all investigated climate impacts: "Natural systems and resources", "Nature-using economic systems", "Infrastructures and buildings", "Nature-remote economic systems", "People and social systems". The consideration of these five system areas refers to their respective impacts and the observed needs for action.

Moreover, the sub-report provides an overview of research needs, both from a methodological perspective and - for the individual fields of action - from a content perspective, before a final conclusion is drawn.

## Inhaltsverzeichnis

|                                                                                                                      |     |
|----------------------------------------------------------------------------------------------------------------------|-----|
| Abbildungsverzeichnis.....                                                                                           | 8   |
| Tabellenverzeichnis.....                                                                                             | 9   |
| Abkürzungsverzeichnis.....                                                                                           | 11  |
| Glossar.....                                                                                                         | 12  |
| Zusammenfassung.....                                                                                                 | 18  |
| 1 Einleitung.....                                                                                                    | 30  |
| 1.1 Die Klimawirkungs- und Risikoanalyse 2021 (KWRA 2021) .....                                                      | 30  |
| 1.2 Die Grenzen der KWRA 2021 .....                                                                                  | 31  |
| 1.3 Methodisches Vorgehen .....                                                                                      | 31  |
| 1.4 Beteiligte an der KWRA 2021 .....                                                                                | 33  |
| 1.5 Struktur des Berichtes der KWRA 2021 .....                                                                       | 33  |
| 2 Gesamtbetrachtung der Klimarisiken ohne Anpassung.....                                                             | 35  |
| 2.1 Vergleich der Klimarisiken .....                                                                                 | 35  |
| 2.2 Vergleich der Ergebnisse der KWRA 2021 mit denen der Vulnerabilitätsanalyse 2015 .....                           | 54  |
| 3 Handlungsfeldübergreifende Auswertung .....                                                                        | 71  |
| 3.1 Klimatische Einflüsse.....                                                                                       | 71  |
| 3.2 Sensitivitätsfaktoren im Quervergleich.....                                                                      | 75  |
| 3.3 Handlungsfeldübergreifende Auswertung der Gewissheit.....                                                        | 78  |
| 3.4 Analyse der Querverbindungen .....                                                                               | 82  |
| 4 Auswertung räumlicher Muster .....                                                                                 | 89  |
| 4.1 Hintergrund, Ziel und Datengrundlage .....                                                                       | 89  |
| 4.2 Klimaraumtypen.....                                                                                              | 89  |
| 4.2.1 Klassifizierung der Klimaraumtypen und Ergebnisdarstellung .....                                               | 89  |
| 4.2.2 Beschreibung der Klimaraumtypen .....                                                                          | 91  |
| 4.2.3 Auswertung der Änderungen bis Mitte und Ende des Jahrhunderts .....                                            | 92  |
| 4.2.4 Auswertung der Änderungen je klimatischer Einfluss für Ende des Jahrhunderts.....                              | 95  |
| 4.3 Klimatische Hotspot-Karten .....                                                                                 | 105 |
| 4.3.1 Grundlage, Methodik zur Erstellung der klimatischen Hotspot-Karten .....                                       | 105 |
| 4.3.2 Hotspot-Karten einzelner Klimasignale .....                                                                    | 106 |
| 4.3.3 Aggregierte klimatische Hotspot-Karten ausgewählter Klimaindikatoren für Mitte und Ende des Jahrhunderts ..... | 109 |
| 5 Gesamtbetrachtung der Klimarisiken mit Anpassung.....                                                              | 112 |
| 5.1 Übersicht der Anpassungskapazität.....                                                                           | 112 |

|        |                                                                                     |     |
|--------|-------------------------------------------------------------------------------------|-----|
| 5.2    | Gesamtbild der Klimarisiken mit Anpassung .....                                     | 123 |
| 6      | Identifizierung von Handlungserfordernissen.....                                    | 136 |
| 6.1    | Priorisierung von Handlungserfordernissen .....                                     | 136 |
| 6.2    | Charakterisierung der Handlungserfordernisse.....                                   | 140 |
| 7      | Querbetrachtung der Systembereiche.....                                             | 146 |
| 8      | Forschungsbedarf.....                                                               | 155 |
| 8.1    | Einleitung .....                                                                    | 155 |
| 8.2    | Forschungsbedarf zu Analyse- und Bewertungsverfahren .....                          | 156 |
| 8.3    | Forschungsbedarf zu Klimaprojektionen, Sensitivitäten und Klimawirkungsketten ..... | 157 |
| 8.4    | Forschungsbedarfe zu den Handlungsfeldern .....                                     | 158 |
| 8.4.1  | Handlungsfeld Biologische Vielfalt.....                                             | 158 |
| 8.4.2  | Handlungsfeld Boden.....                                                            | 159 |
| 8.4.3  | Handlungsfeld Landwirtschaft .....                                                  | 159 |
| 8.4.4  | Handlungsfeld Wald- und Forstwirtschaft .....                                       | 160 |
| 8.4.5  | Handlungsfeld Fischerei.....                                                        | 160 |
| 8.4.6  | Handlungsfeld Küsten- und Meeresschutz .....                                        | 161 |
| 8.4.7  | Handlungsfeld Wasserhaushalt, Wasserwirtschaft .....                                | 161 |
| 8.4.8  | Handlungsfeld Bauwesen.....                                                         | 162 |
| 8.4.9  | Handlungsfeld Energiewirtschaft.....                                                | 162 |
| 8.4.10 | Handlungsfeld Verkehr, Verkehrsinfrastruktur .....                                  | 163 |
| 8.4.11 | Handlungsfeld Industrie und Gewerbe.....                                            | 163 |
| 8.4.12 | Handlungsfeld Tourismuswirtschaft .....                                             | 164 |
| 8.4.13 | Handlungsfeld Menschliche Gesundheit .....                                          | 164 |
| 9      | Schlussbetrachtung .....                                                            | 166 |
|        | Quellenverzeichnis .....                                                            | 169 |

## Abbildungsverzeichnis

|               |                                                                                                                                                                                                              |     |
|---------------|--------------------------------------------------------------------------------------------------------------------------------------------------------------------------------------------------------------|-----|
| Abbildung 1:  | Prozentualer Anteil der als hoch bewerteten Klimarisiken für die Gegenwart und den pessimistischen Fall zur Mitte und zum Ende des Jahrhunderts bezogen auf die fünf Systeme .....                           | 49  |
| Abbildung 2:  | Handlungsfelder mit großen Divergenzen bei der Entwicklung der Klimarisiken .....                                                                                                                            | 50  |
| Abbildung 3:  | Handlungsfelder mit erwartetem starkem Anstieg der Klimarisiken.....                                                                                                                                         | 51  |
| Abbildung 4:  | Handlungsfelder mit besonders hohen Risiken schon zur Mitte des Jahrhunderts .....                                                                                                                           | 52  |
| Abbildung 5:  | Anzahl aller pro klimatischem Einfluss negativ beeinflusster Klimawirkungen ....                                                                                                                             | 72  |
| Abbildung 6:  | Anzahl der hoch bewerteten und pro klimatischem Einfluss negativ beeinflussten Klimawirkungen .....                                                                                                          | 73  |
| Abbildung 7:  | Gemittelte Gewissheiten der Bewertungen der Klimawirkungen mit hohem, mittleren und geringen Klimarisiko für die Mitte und das Ende des Jahrhunderts (jeweils optimistischer und pessimistischer Fall) ..... | 81  |
| Abbildung 8:  | Querverbindungen zwischen den Handlungsfeldern .....                                                                                                                                                         | 83  |
| Abbildung 9:  | Kreislauf der Querverbindungen zwischen den Klimawirkungen „Hitzebelastung“, „Bedarf an Kühlenergie“ und „Stadtklima/Wärmeinseln“ .....                                                                      | 86  |
| Abbildung 10: | Kartendarstellung der sieben Klimaraumtypen als Ergebnis der k-means Clusteranalyse der 14 Klimaindikatoren für den Bezugszeitraum (1971 bis 2000).....                                                      | 90  |
| Abbildung 11: | Durchschnittliche Veränderung ausgewählter Klimaparameter (2031 bis 2060) im Vergleich zum Bezugszeitraum (1971 bis 2000) .....                                                                              | 93  |
| Abbildung 12: | Projizierte absolute Änderungen der mittleren jährlichen Anzahl Heißer Tage (RCP 8.5) für das Ende des Jahrhunderts .....                                                                                    | 96  |
| Abbildung 13: | Projizierte absolute Änderungen der mittleren jährlichen Anzahl Frosttage (RCP 8.5) für das Ende des Jahrhunderts .....                                                                                      | 97  |
| Abbildung 14: | Projizierte absolute Änderungen der mittleren jährlichen Temperatur im Sommer (RCP 8.5) für das Ende des Jahrhunderts .....                                                                                  | 98  |
| Abbildung 15: | Projizierte absolute Änderungen der mittleren jährlichen Temperatur im Winter (RCP 8.5) für das Ende des Jahrhunderts .....                                                                                  | 99  |
| Abbildung 16: | Projizierte Änderungen des mittleren jährlichen Niederschlags im Sommer (RCP 8.5) für das Ende des Jahrhunderts .....                                                                                        | 100 |
| Abbildung 17: | Projizierte Änderungen des mittleren jährlichen Niederschlags im Winter (RCP 8.5) für das Ende des Jahrhunderts .....                                                                                        | 101 |
| Abbildung 18: | Projizierte Änderungen der mittleren Anzahl der Trockentage im Sommer (RCP 8.5) für das Ende des Jahrhunderts .....                                                                                          | 102 |
| Abbildung 19: | Projizierte Änderungen der mittleren Anzahl der Trockentage im Winter (RCP 8.5) für das Ende des Jahrhunderts .....                                                                                          | 103 |
| Abbildung 20: | Projizierte Änderungen der mittleren Anzahl der Starkniederschlagstage (RCP 8.5) für das Ende des Jahrhunderts .....                                                                                         | 104 |



|               |                                                                                                                                  |     |
|---------------|----------------------------------------------------------------------------------------------------------------------------------|-----|
| Abbildung 21: | Projizierte Änderungen der mittleren täglichen extremen Windgeschwindigkeiten (RCP 8.5) für Ende des Jahrhunderts .....          | 105 |
| Abbildung 22: | Hotspot-Karten der einzelnen Klimaindikatoren mit den extremsten 15 Prozent als Bezug für das Ende des Jahrhunderts.....         | 108 |
| Abbildung 23: | Gewichtet-aggregierte Hotspots der sechs Klimaindikatoren für Mitte und Ende des Jahrhunderts; Absolut- und Änderungswerte ..... | 110 |
| Abbildung 24: | Klimarisikenvon betroffenen Systemen, Wirkbeziehungen und Dringlichkeit von Anpassung.....                                       | 152 |

## Tabellenverzeichnis

|             |                                                                                                                                                                                                                                                                 |    |
|-------------|-----------------------------------------------------------------------------------------------------------------------------------------------------------------------------------------------------------------------------------------------------------------|----|
| Tabelle 1:  | Klimarisiken der untersuchten Klimawirkungen nach Handlungsfeld .....                                                                                                                                                                                           | 36 |
| Tabelle 2:  | Chancen des Klimawandels nach Handlungsfeld .....                                                                                                                                                                                                               | 42 |
| Tabelle 3:  | Übersicht der Klimarisiken ohne Anpassung auf Ebene der Handlungsfelder .....                                                                                                                                                                                   | 46 |
| Tabelle 4:  | Vergleich der Klimarisiken in KWRA 2021 und VA 2015 Handlungsfeld „Landwirtschaft“ .....                                                                                                                                                                        | 58 |
| Tabelle 5:  | Vergleich der Klimarisiken in KWRA 2021 und VA 2015 im Handlungsfeld „Wald- und Forstwirtschaft“ .....                                                                                                                                                          | 59 |
| Tabelle 6:  | Vergleich der Klimarisiken in KWRA 2021 und VA 2015 im Handlungsfeld „Biologische Vielfalt“ .....                                                                                                                                                               | 60 |
| Tabelle 7:  | Vergleich der Klimarisiken in KWRA 2021 und VA 2015 im Handlungsfeld „Boden“ .....                                                                                                                                                                              | 61 |
| Tabelle 8:  | Vergleich der Klimarisiken in KWRA 2021 und VA 2015 im Handlungsfeld „Fischerei“ .....                                                                                                                                                                          | 62 |
| Tabelle 9:  | Vergleich der Klimarisiken in KWRA 2021 und VA 2015 im Handlungsfeld „Küsten- und Meeresschutz“ .....                                                                                                                                                           | 63 |
| Tabelle 10: | Vergleich der Klimarisiken in KWRA 2021 und VA 2015 im Handlungsfeld „Wasserhaushalt, Wasserwirtschaft“ .....                                                                                                                                                   | 64 |
| Tabelle 11: | Vergleich der Klimarisiken in KWRA 2021 und VA 2015 im Handlungsfeld „Verkehr, Verkehrsinfrastruktur“ .....                                                                                                                                                     | 65 |
| Tabelle 12: | Vergleich der Klimarisiken in KWRA 2021 und VA 2015 im Handlungsfeld „Bauwesen“ .....                                                                                                                                                                           | 65 |
| Tabelle 13: | Vergleich der Klimarisiken in KWRA 2021 und VA 2015 im Handlungsfeld „Energiewirtschaft“ .....                                                                                                                                                                  | 66 |
| Tabelle 14: | Vergleich der Klimarisiken in KWRA 2021 und VA 2015 im Handlungsfeld „Tourismuswirtschaft“ .....                                                                                                                                                                | 67 |
| Tabelle 15: | Vergleich der Klimarisiken in KWRA 2021 und VA 2015 im Handlungsfeld „Industrie und Gewerbe“ .....                                                                                                                                                              | 68 |
| Tabelle 16: | Vergleich der Klimarisiken in KWRA 2021 und VA 2015 im Handlungsfeld „Menschliche Gesundheit“ .....                                                                                                                                                             | 69 |
| Tabelle 17: | Durchschnittliche Gewissheiten und Grad der Gewissheit der Bewertungen aller bearbeiteten Klimawirkungen und der jeweiligen Klimawirkungen pro Handlungsfeld für die Zeiträume Mitte und Ende des Jahrhunderts (Reihenfolge nach aufsteigender Gewissheit)..... | 80 |

|             |                                                                                                                                                                  |     |
|-------------|------------------------------------------------------------------------------------------------------------------------------------------------------------------|-----|
| Tabelle 18: | Mittelwerte der Klimaindikatoren für den Bezugszeitraum (1971 bis 2000) für alle Rasterzellen innerhalb eines Klimaraumtyps.....                                 | 91  |
| Tabelle 19: | Absolute und relative Änderungen für Mitte des Jahrhunderts in den sieben Klimaraumtypen im RCP8.5-Szenario bezogen auf den Bezugszeitraum (1971 bis 2000) ..... | 94  |
| Tabelle 20: | Absolute und relative Änderungen für Ende des Jahrhunderts in den sieben Klimaraumtypen im RCP8.5-Szenario bezogen auf den Bezugszeitraum (1971 bis 2000) .....  | 95  |
| Tabelle 21: | Anpassungskapazität auf Ebene der Handlungsfelder .....                                                                                                          | 117 |
| Tabelle 22: | Anpassungskapazität auf Ebene der Klimawirkungen.....                                                                                                            | 119 |
| Tabelle 23: | Klimarisiken mit Anpassung auf Ebene der Handlungsfelder .....                                                                                                   | 124 |
| Tabelle 24: | Klimarisiken mit Anpassung auf Ebene der Handlungsfelder .....                                                                                                   | 128 |
| Tabelle 25: | 31 Klimawirkungen mit sehr dringenden Handlungserfordernissen .....                                                                                              | 138 |
| Tabelle 26: | 23 Klimawirkungen mit dringenden Handlungserfordernissen .....                                                                                                   | 139 |
| Tabelle 27: | Kategorien von sehr dringenden Handlungserfordernissen .....                                                                                                     | 142 |
| Tabelle 28: | Ausgehende und eingehende Querverbindungen der fünf Systembereiche.....                                                                                          | 153 |

## Abkürzungsverzeichnis

|                     |                                                                                                            |
|---------------------|------------------------------------------------------------------------------------------------------------|
| <b>APA III</b>      | Aktionsplan Anpassung III                                                                                  |
| <b>CMIP3, CMIP5</b> | World Climate Research Programme Coupled Model Intercomparison Project Phase 3 (beziehungsweise "Phase 5") |
| <b>DAS</b>          | Deutsche Anpassungsstrategie an den Klimawandel                                                            |
| <b>EURO-CORDEX</b>  | CORDEX für die Region Europa                                                                               |
| <b>GCM</b>          | General Circulation Model                                                                                  |
| <b>IMA-A</b>        | Interministerielle Arbeitsgruppe Anpassung                                                                 |
| <b>IPCC</b>         | Intergovernmental Panel on Climate Change                                                                  |
| <b>KWRA 2021</b>    | Klimawirkungs- und Risikoanalyse 2021 für Deutschland                                                      |
| <b>ReKliEs</b>      | Regionale Klimaprojektionen Ensemble für Deutschland                                                       |
| <b>RCP</b>          | Representative Concentration Pathway                                                                       |
| <b>UVPG</b>         | Gesetz über die Umweltverträglichkeitsprüfung                                                              |
| <b>VA 2015</b>      | Vulnerabilitätsanalyse 2015                                                                                |
| <b>WCRP</b>         | World Climate Research Programme                                                                           |

## Glossar

| Begriff                                                         | Erläuterung                                                                                                                                                                                                                                                                                                                                                                                                                                                                                              |
|-----------------------------------------------------------------|----------------------------------------------------------------------------------------------------------------------------------------------------------------------------------------------------------------------------------------------------------------------------------------------------------------------------------------------------------------------------------------------------------------------------------------------------------------------------------------------------------|
| Anpassungsdauer                                                 | Als Anpassungsdauer wird die Zeitdauer für das Wirksamwerden umfassender Maßnahmen zur großräumigen Reduzierung einer Klimawirkung in Deutschland bezeichnet. Die benötigte Zeit umfasst die Zeit für Vorarbeiten, wie die Sicherung der Akzeptanz und Finanzierung, Planung, Bau und sonstige Umsetzungsprozesse, wie die Entwicklung von neuen Märkten, sowie die Zeit bis zum Wirksamwerden der Maßnahme vor Ort.                                                                                     |
| Anpassungsdimension                                             | Grundlegende Kategorien, denen einzelne Anpassungsmaßnahmen oder Anpassungsinstrumente zugeordnet werden können. In der KWRA 2021 werden sechs Anpassungsdimensionen genutzt: Wissen; Motivation und Akzeptanz; Technologie und natürliche Ressourcen; Finanzielle Ressourcen; Rechtliche Rahmenbedingungen und politische Strategien sowie Institutionelle Struktur und personelle Ressourcen.                                                                                                          |
| Anpassungskapazität                                             | Fähigkeit von Systemen, Institutionen, Menschen und anderen Lebewesen, sich auf potenzielle Schäden einzustellen, Vorteile zu nutzen oder auf Auswirkungen zu reagieren (ISO 14091; Agard et al. 2014). Wichtige Dimensionen der Anpassung sind zum Beispiel Wissen oder Technologie.                                                                                                                                                                                                                    |
| Behördennetzwerk                                                | Netzwerk aus Bundesoberbehörden und Bundesinstitutionen zum Thema „Klimawandel und Anpassung“.                                                                                                                                                                                                                                                                                                                                                                                                           |
| Beitrag der Anpassungsdimensionen zur Wirksamkeit der Anpassung | Ausmaß, in dem beschlossene Maßnahmen beziehungsweise weiterreichende Anpassung durch einen Zuwachs an Wissen, eine Steigerung der Motivation und Akzeptanz, einen Zuwachs an Technologie und natürlichen Ressourcen, einen Zuwachs an finanziellen Ressourcen, eine Erweiterung der rechtlichen Rahmenbedingungen und politischen Strategien oder eine Erweiterung der institutionellen Struktur und personellen Ressourcen in Zukunft wirksam werden beziehungsweise werden können.                    |
| Beschlossene Maßnahmen                                          | Teil des Möglichkeitsraums einer weiterreichenden Anpassungskapazität; Grundlage für die Identifizierung beschlossener Maßnahmen sind die im Aktionsplan Anpassung III (APA III) der Deutschen Anpassungsstrategie (DAS) formulierten Anpassungsinstrumente und -maßnahmen in der Zuständigkeit des Bundes (in Ausnahmefällen auch weitere Planungsdokumente, sofern diese politisch bereits beschlossene Planungen mit klarem Maßnahmencharakter enthalten).                                            |
| Bewertung des Klimarisikos                                      | Bewertung des Klimarisikos der in der KWRA 2021 bearbeiteten Klimawirkungen und Handlungsfelder. Die Bewertung des Klimarisikos zeigt auf, welche gesellschaftlichen und ökologischen Folgen sich aus einer geminderten Funktionsfähigkeit eines betrachteten Systems ergeben könnten. Für die Bewertung der Klimarisiken wurde eine dreistufige Skala von „gering“, „mittel“, „hoch“ verwendet. Die Bewertung erfolgte in Form qualitativer Expertenurteile, es wurden keine Schwellenwerte festgelegt. |
| Bezugszeitraum                                                  | Der Zeitraum von 1971-2000.                                                                                                                                                                                                                                                                                                                                                                                                                                                                              |
| Delphi-Methode                                                  | Eine Methode zum Ermitteln von Gruppenurteilen. Im Rahmen der Delphi-Methode wird durch Diskussionsprozesse die Findung eines Konsenses von Expertenmeinungen angestrebt. Dabei werden individuelle Antworten oder Bewertungsergebnisse aggregiert und in die Gruppe zurückgegeben. Die Gruppenmitglieder haben dann die Möglichkeit ihre Antworten zu                                                                                                                                                   |

| Begriff                                             | Erläuterung                                                                                                                                                                                                                                                                                                                                                                                                                                                                                           |
|-----------------------------------------------------|-------------------------------------------------------------------------------------------------------------------------------------------------------------------------------------------------------------------------------------------------------------------------------------------------------------------------------------------------------------------------------------------------------------------------------------------------------------------------------------------------------|
|                                                     | überprüfen und, wenn gewollt, zu überarbeiten. Dieser Prozess wird fortgesetzt, bis ein vorher definiertes Ergebnis erreicht ist (zum Beispiel Konsens, Anzahl an Iterationen) (Grime und Wright 2014; Zartha Sossa et al. 2019)                                                                                                                                                                                                                                                                      |
| Dynamik-Szenario der sozioökonomischen Projektionen | Für die KWRA 2021 entwickeltes sozioökonomisches Szenario, das einer Entwicklung mit einer vergleichsweise stärkeren Bevölkerungsentwicklung und einem höheren Wirtschaftswachstum entspricht.                                                                                                                                                                                                                                                                                                        |
| Ende des Jahrhunderts                               | Der Zeitraum von 2071 bis 2100.                                                                                                                                                                                                                                                                                                                                                                                                                                                                       |
| Expertenwissen                                      | Narrative Informationen sowie Einschätzungen von an der Analyse beteiligten Fachleuten; wird im Rahmen von Workshops, Telefongesprächen, Interviews, Abfragen etc. erhoben.                                                                                                                                                                                                                                                                                                                           |
| Expertenworkshop                                    | Workshop, an dem (auch) externe Expertinnen und Experten teilnehmen.                                                                                                                                                                                                                                                                                                                                                                                                                                  |
| Extensiv bearbeitete Klimawirkung                   | Fachliche Analyse einer Klimawirkung durch textliches Zusammenfassen vorhandener Informationen und Expertenwissens.                                                                                                                                                                                                                                                                                                                                                                                   |
| Externe Expertinnen und Experten                    | Fachliche Experten und Expertinnen, die keine Bundesoberbehörden oder Bundesinstitutionen vertreten.                                                                                                                                                                                                                                                                                                                                                                                                  |
| Fachleute                                           | Vertreter und Vertreterinnen der Netzwerkpartner und externe Expertinnen und Experten, die die Bearbeitung einer Klimawirkung fachlich begleiten.                                                                                                                                                                                                                                                                                                                                                     |
| Fachliche Analyse einer Klimawirkung                | Fachliche Analyse einer Klimawirkung hinsichtlich ihrer Wirkung auf die Funktionsfähigkeit eines Teilsystems innerhalb eines Handlungsfeldes. Die Analyse erfolgt auf Grund von Fakten und Informationen (Indikatoren, Modellergebnissen, Expertenwissen, Literatur).                                                                                                                                                                                                                                 |
| Faktor                                              | Die Sensitivität, die räumliche Exposition und die Anpassungskapazität können nicht direkt in ihrer Ausprägung eingeschätzt werden. Stattdessen werden ihnen Faktoren zugeordnet, die eingeschätzt werden können (Beispiel: für Sensitivität: Altersstruktur der Bevölkerung; für räumliche Exposition: Vorkommen von landwirtschaftlichen Nutzflächen; für Anpassungskapazität: Ausbaumöglichkeiten beim Hochwasserschutz). Diese Faktoren können wiederum durch Indikatoren messbar gemacht werden. |
| Gewissheit                                          | Die Gewissheit stellt die Sicherheit der Bewertungsergebnisse, basierend auf dem Vorhandensein von Daten, der Zuverlässigkeit der verwendeten Daten, Kenntnissen über Wirkzusammenhänge, der Genauigkeit und Plausibilität von Modellannahmen und der Eindeutigkeit von Trends dar.                                                                                                                                                                                                                   |
| Handlungserfordernis                                | Das Handlungserfordernis ergibt sich aus den Ergebnissen der Untersuchung einer Klimawirkung ohne weitere Anpassung und der Untersuchung der notwendigen Anpassungsdauer.                                                                                                                                                                                                                                                                                                                             |
| Indikator                                           | Quantitative, qualitative oder binäre Variable, die gemessen oder beschrieben werden kann, um Aussagen zu einem festgelegten Kriterium zu treffen (angelehnt an ISO 14091). Indikatoren, die nur näherungsweise Aussagen zu einem Kriterium ermöglichen, werden Proxy-Indikatoren genannt.                                                                                                                                                                                                            |

| Begriff                           | Erläuterung                                                                                                                                                                                                                                                                                                                                                                                                                                                                                                                                                                                                                                                                                                                                                                                                                                                                                                                                                                                                                                                                                                                                                                                                                                                                                                                                                                                                                                     |
|-----------------------------------|-------------------------------------------------------------------------------------------------------------------------------------------------------------------------------------------------------------------------------------------------------------------------------------------------------------------------------------------------------------------------------------------------------------------------------------------------------------------------------------------------------------------------------------------------------------------------------------------------------------------------------------------------------------------------------------------------------------------------------------------------------------------------------------------------------------------------------------------------------------------------------------------------------------------------------------------------------------------------------------------------------------------------------------------------------------------------------------------------------------------------------------------------------------------------------------------------------------------------------------------------------------------------------------------------------------------------------------------------------------------------------------------------------------------------------------------------|
| Intensiv bearbeitete Klimawirkung | Fachliche Analyse einer Klimawirkung durch die Spezifizierung der Wirkung, des Zielsystems, der Faktoren und Indikatoren, Analyse und ggf. Datenaufbereitung, textliche und ggf. kartographische Darstellungen.                                                                                                                                                                                                                                                                                                                                                                                                                                                                                                                                                                                                                                                                                                                                                                                                                                                                                                                                                                                                                                                                                                                                                                                                                                 |
| Klimarisiko                       | Das Potenzial für nachteilige Folgen für menschengemachte oder natürliche Systeme, unter Berücksichtigung der Vielfalt der Werte und Ziele, die mit solchen Systemen verbunden sind. Im Zusammenhang mit dem Klimawandel können Risiken sowohl aus den möglichen Auswirkungen des Klimawandels als auch aus den menschlichen Reaktionen auf den Klimawandel entstehen. Zu den relevanten nachteiligen Folgen gehören solche auf Leben, Lebensgrundlagen, Gesundheit und Wohlbefinden, wirtschaftliche, soziale und kulturelle Werte und Investitionen, Infrastruktur, Dienstleistungen (einschließlich Ökosystemleistungen), Ökosysteme und Arten. Im Zusammenhang mit den Auswirkungen des Klimawandels ergeben sich Risiken aus dynamischen Wechselwirkungen zwischen klimatischen Einflüssen und der räumlichen Exposition sowie der Sensitivität und Anpassungskapazität des betroffenen menschengemachten oder natürlichen Systems. Alle diese Komponenten können jeweils Unsicherheiten in Bezug auf das Ausmaß und die Wahrscheinlichkeit des Auftretens unterliegen und können sich im Laufe der Zeit und des räumlichen Bezugs aufgrund von sozio-ökonomischen Veränderungen und menschlichen Entscheidungen ändern. Im Kontext der KWRA 2021 wird der Begriff Klimarisiko angelehnt an die Definition des IPCC ab dem Zeitpunkt verwendet, ab dem eine Bewertung durch das Behördenetzwerk „Klimawandel und Anpassung“ erfolgt (ist). |
| Klimarisiko mit Anpassung         | Ergebnis eines normativen Bewertungsprozesses. Stellt das eingeschätzte Klimarisiko in Bezug auf eine Klimawirkung oder ein Handlungsfeld unter Berücksichtigung von Anpassung dar.                                                                                                                                                                                                                                                                                                                                                                                                                                                                                                                                                                                                                                                                                                                                                                                                                                                                                                                                                                                                                                                                                                                                                                                                                                                             |
| Klimarisiko ohne Anpassung        | Ergebnis eines normativen Bewertungsprozesses. Stellt das eingeschätzte Klimarisiko in Bezug auf eine Klimawirkung oder ein Handlungsfeld ohne Berücksichtigung möglicher Anpassungsmaßnahmen dar.                                                                                                                                                                                                                                                                                                                                                                                                                                                                                                                                                                                                                                                                                                                                                                                                                                                                                                                                                                                                                                                                                                                                                                                                                                              |
| Klimatischer Einfluss             | Ein sich ändernder Aspekt des Klimasystems, der eine Komponente eines menschengemachten oder natürlichen Systems beeinflusst (Agard et al. 2014).                                                                                                                                                                                                                                                                                                                                                                                                                                                                                                                                                                                                                                                                                                                                                                                                                                                                                                                                                                                                                                                                                                                                                                                                                                                                                               |
| Klimawirkung                      | Die potenziellen oder realisierten Folgen von Klimarisiken auf natürliche und menschengemachte Systeme. Klimawirkungen beziehen sich im Allgemeinen auf Auswirkungen auf Leben, Lebensgrundlagen, Gesundheit und Wohlbefinden, Ökosysteme und Arten, wirtschaftliche, soziale und kulturelle Werte, Dienstleistungen (einschließlich Ökosystemdienstleistungen) und Infrastruktur. Sie können als Folgen oder Ergebnisse bezeichnet werden und nachteilig oder vorteilhaft sein. In der KWRA 2021 wird der Terminus Klimawirkung angelehnt an die Definition des IPCC bis zu dem Zeitpunkt verwendet, an dem eine Bewertung des Klimarisikos stattfindet.                                                                                                                                                                                                                                                                                                                                                                                                                                                                                                                                                                                                                                                                                                                                                                                       |
| Mitte des Jahrhunderts            | Der Zeitraum von 2031 bis 2060.                                                                                                                                                                                                                                                                                                                                                                                                                                                                                                                                                                                                                                                                                                                                                                                                                                                                                                                                                                                                                                                                                                                                                                                                                                                                                                                                                                                                                 |
| Narrative Informationen           | Informationen, die die Interpretation von Daten und fachlichen Analysen unterstützen. Narrative Informationen können beispielsweise Beschreibungen von Wirkzusammenhängen, Zuständen oder Problemlagen sein. Die Quelle kann neben den beteiligten Fachleuten auch die Fachliteratur sein.                                                                                                                                                                                                                                                                                                                                                                                                                                                                                                                                                                                                                                                                                                                                                                                                                                                                                                                                                                                                                                                                                                                                                      |

| Begriff                           | Erläuterung                                                                                                                                                                                                                                                                                                                                                                                                                                                                                                                                                                                             |
|-----------------------------------|---------------------------------------------------------------------------------------------------------------------------------------------------------------------------------------------------------------------------------------------------------------------------------------------------------------------------------------------------------------------------------------------------------------------------------------------------------------------------------------------------------------------------------------------------------------------------------------------------------|
| Netzwerkpartner und -partnerinnen | Bundesoberbehörden und Bundesinstitutionen, die Mitglied im Behördennetzwerk „Klimawandel und Anpassung“ sind. Als fachlich begleitende Netzwerkpartner werden Netzwerkpartner und -partnerinnen bezeichnet, die auf der fachlichen Analyseebene für ein bestimmtes Handlungsfeld an der KWRA 2021 mitwirken.                                                                                                                                                                                                                                                                                           |
| Netzwerktreffen                   | Treffen des Behördennetzwerks „Klimawandel und Anpassung“.                                                                                                                                                                                                                                                                                                                                                                                                                                                                                                                                              |
| Operationalisierung               | Vorgehen für die fachliche Analyse einer Klimawirkung.                                                                                                                                                                                                                                                                                                                                                                                                                                                                                                                                                  |
| Optimistischer Fall               | Pfad zukünftiger klimatischer und sozioökonomischer Entwicklung, der mit einer im Vergleich zu alternativen Pfaden weniger negativen Klimawirkung verbunden ist und die günstigere Szenarienkombination mit geringeren Risiken oder höheren Chancen im Vergleich zur pessimistischen Szenarienkombinationen darstellt (15. oder 85. Perzentil bei einem Ensemble von Klimamodellprojektionen; bei den sozioökonomischen Szenarien in Abstimmung mit den Fachleuten spezifiziert). Im Regelfall ist der optimistische Fall die Kombination aus dem 15. Perzentil des RCP8.5 und dem Trend-Szenario.      |
| Pessimistischer Fall              | Pfad zukünftiger klimatischer und sozioökonomischer Entwicklung, der mit einer im Vergleich zu alternativen Pfaden stärker negativen Klimawirkung verbunden ist und die ungünstigere Szenarienkombination mit höheren Risiken oder niedrigeren Chancen im Vergleich zur optimistischen Szenarienkombinationen darstellt (15. oder 85. Perzentil bei einem Ensemble von Klimamodellprojektionen; bei den sozioökonomischen Szenarien in Abstimmung mit den Fachleuten spezifiziert). Im Regelfall ist der pessimistische Fall die Kombination aus dem 85. Perzentil des RCP8.5 und dem Dynamik-Szenario. |
| Projektion                        | Möglicher zukünftiger Zustand einer oder mehrerer Größen, üblicherweise erstellt mit einem Modell basierend auf einem Szenario.                                                                                                                                                                                                                                                                                                                                                                                                                                                                         |
| Qualitative Daten                 | Daten, die nicht auf einer Messskala geordnet werden können, sondern zum Beispiel Zustände oder Situationen beschreiben (zum Beispiel Geschlecht, Familienstand, Wohnort etc.); können anhand von Kategorien verglichen werden, das heißt nominalskalierte Daten.                                                                                                                                                                                                                                                                                                                                       |
| Qualitative Methoden              | Methoden, die der Erhebung von Einschätzungen und narrativen Informationen dienen; vor allem Interviews, Telefonkonferenzen, darüberhinausgehende Gespräche mit Fachleuten (zum Beispiel im Rahmen von Workshops) und Literaturrecherchen.                                                                                                                                                                                                                                                                                                                                                              |
| Quantitative Daten                | Daten, die auf einer Messskala geordnet und anhand dieser verglichen werden können (zum Beispiel Einkommen, Entfernungen, Gebietsgrößen, Zensuren etc.).                                                                                                                                                                                                                                                                                                                                                                                                                                                |
| Quantitative Methoden             | Mathematische Auswertung sowie rechnerische Zusammenführung von Daten und Einschätzungen.                                                                                                                                                                                                                                                                                                                                                                                                                                                                                                               |
| Räumliche Exposition              | Vorhandensein von Systemen wie Menschen, Existenzgrundlagen, Arten bzw. Ökosystemen, Umweltfunktionen, -leistungen und -ressourcen, Infrastruktur oder ökonomischem, sozialem oder kulturellem Vermögen in Gegenden und Umständen, die betroffen sein könnten (angelehnt an ISO                                                                                                                                                                                                                                                                                                                         |

| Begriff                                           | Erläuterung                                                                                                                                                                                                                                                                                                                                                                                                                         |
|---------------------------------------------------|-------------------------------------------------------------------------------------------------------------------------------------------------------------------------------------------------------------------------------------------------------------------------------------------------------------------------------------------------------------------------------------------------------------------------------------|
|                                                   | 14091; Agard et al. 2014). Mögliche Faktoren zur Beschreibung der Exposition sind zum Beispiel Einwohnerdichte oder Vorkommen kritischer Infrastruktur.                                                                                                                                                                                                                                                                             |
| Sensitivität                                      | Ausmaß, zu dem ein System durch Schwankungen oder Änderungen des Klimas vor- oder nachteilig beeinflusst wird (angelehnt an ISO 14091; Agard et al. 2014). Faktoren für Sensitivität sind zum Beispiel Baumartenzusammensetzung oder Altersstruktur der Bevölkerung.                                                                                                                                                                |
| Spezifische Klimawirkung                          | Eine für die Bearbeitung in der KWRA 2021 gegenüber einer allgemeiner beschriebenen Klimawirkung weiter spezifizierte Klimawirkung. Die Spezifizierung erfolgt über eine genaue Beschreibung des Teilsystems, der Auswahl von Faktoren und Indikatoren sowie des Zielsystems der fachlichen Analyse.                                                                                                                                |
| Spezifizierung                                    | Die Eingrenzung einer zu untersuchenden Klimawirkung, sodass sie mit den vorgesehenen Methoden und vertretbarem Aufwand operationalisierbar ist. Die Spezifizierung erfolgte im Rahmen der KWRA 2021 auf Basis vorhandenen Wissens, vorhandener Daten und der Relevanz einzelner Teilsysteme beziehungsweise Wirkmechanismen.                                                                                                       |
| Systembereiche                                    | Um eine Spezifizierung der jeweils betroffenen Systeme zu ermöglichen, wurden die in der KWRA 2021 untersuchten Klimawirkungen in fünf Systembereiche eingeteilt: Natürliche Systeme und Ressourcen, naturnutzende Wirtschaftssysteme, Infrastrukturen und Gebäude, naturferne Wirtschaftssysteme, Menschen und soziale Systeme                                                                                                     |
| Szenarienkombination                              | Kombinationen aus Klima- und sozioökonomischen Szenarien, das heißt aus dem 15. oder 85. Perzentil des RCP8.5 auf der einen Seite und den sozioökonomischen Projektionen für die Mitte des Jahrhunderts (Szenario „Trend“ oder Szenario „Dynamik“) auf der anderen Seite.                                                                                                                                                           |
| Szenario                                          | Beschreibung einer möglichen Zukunft durch Text und/oder die zeitliche Entwicklung von Kennzahlen.                                                                                                                                                                                                                                                                                                                                  |
| Teilsystem                                        | Teilsysteme unterteilen eine Klimawirkung in thematischer oder räumlicher Hinsicht in verschiedene potenziell durch den Klimawandel betroffene Systeme (Beispiel: „Nordseeküste“ und „Ostseeküste“ oder „Steilküsten“ und „Watt“ als Teilsysteme für die Klimawirkung „Naturräumliche Schäden an Küsten“).                                                                                                                          |
| Trend-Szenario der sozioökonomischen Projektionen | Für die KWRA 2021 entwickeltes sozioökonomisches Szenario, das eine zukünftige sozioökonomische Entwicklung beschreibt, die einer Fortsetzung der aktuell beobachteten Entwicklung entspricht.                                                                                                                                                                                                                                      |
| Vorgelagerte Wirkung                              | Ein auslösender Faktor, der zu einer relevanten Klimawirkung führen kann (zum Beispiel Hochwasser als vorgelagerte Wirkung für Schäden an Infrastrukturen). Daten und Informationen zu den vorgelagerten Wirkungen werden als Input für die fachliche Analyse und Bewertung von nachgelagerten Wirkungen verwendet, können aber auch selbst eingeschätzt und bewertet werden. Die Entscheidung hierzu fällt bei der Spezifizierung. |
| Weiterreichende Anpassung                         | Die maximal mögliche konventionelle Anpassung, also gezielte Klimaanpassungsmaßnahmen, die über die beschlossenen Maßnahmen hinausgehen und unter den angenommenen sozioökonomischen Entwicklungen                                                                                                                                                                                                                                  |



| Begriff                   | Erläuterung                                                                                                                                                                                                                                                               |
|---------------------------|---------------------------------------------------------------------------------------------------------------------------------------------------------------------------------------------------------------------------------------------------------------------------|
|                           | und gegenwärtigen politischen Rahmenbedingungen als plausibel angesehen werden können. Weiterreichende Anpassung schließt in diesem Verständnis die beschlossenen Maßnahmen mit ein (siehe auch die Definition der beschlossenen Maßnahmen).                              |
| Wirksamkeit von Anpassung | Ausmaß, in dem Anpassung (beschlossene Maßnahmen oder weiterreichende Anpassung) das Klimarisiko reduziert.                                                                                                                                                               |
| Wirkungskette             | Analytischer Ansatz, der das Verständnis ermöglicht, wie gegebene klimatische Einflüsse und ggf. vorgelagerte Klimawirkungen direkte und indirekte Auswirkungen erzeugen, welche sich über ein dieses Gefahren ausgesetztes System fortpflanzen (angelehnt an ISO 14091). |
| Zielsystem                | Beschreibt die Zustände eines potenziell betroffenen Systems, die einer bestimmten Kategorie der Beeinträchtigung der Funktionsfähigkeit des Systems auf Grund des Klimawandels entsprechen.                                                                              |

## Zusammenfassung

### Hintergrund

Im Auftrag der Bundesregierung und im Kontext der Deutschen Anpassungsstrategie an den Klimawandel (DAS) wurden im Rahmen der KWRA 2021 sowohl die mit dem Klimawandel verbundenen zukünftigen Risiken für Deutschland untersucht und bewertet als auch die Möglichkeiten, diese Risiken durch Anpassung zu adressieren, analysiert und die Wirksamkeit der Anpassung eingeschätzt. Die KWRA 2021 zielt darauf ab, eine wesentliche Grundlage für die Weiterentwicklung der Anpassung in Deutschland zu schaffen, insbesondere für die Entwicklung der nächsten Aktionspläne Anpassung der Bundesregierung.

Um Unsicherheiten und realistische Bandbreiten bezüglich der Zukunftsaussagen abzubilden, wurden zwei Fälle betrachtet: ein „pessimistischer“ Fall mit einem starken Wandel und ein „optimistischer“ Fall mit einem demgegenüber schwächeren Wandel. Hinsichtlich der Anpassungskapazität wurden mögliche Entwicklungen präzisiert, indem zwischen beschlossenen Maßnahmen und weiterreichender Anpassung unterschieden wurde. Grundlage der beschlossenen Maßnahmen ist der Aktionsplan Anpassung III (der Bundesregierung). Weiterreichende Anpassung umfasst neben den beschlossenen auch darüberhinausgehende Maßnahmen, deren Umsetzung unter den angenommenen sozioökonomischen Entwicklungen und gegenwärtigen politischen Rahmenbedingungen als plausibel angesehen werden kann.

Im vorliegenden Teilbericht 6 zur integrierten Auswertung wurden die Ergebnisse aller Handlungsfelder übergreifend ausgewertet, um besonders betroffene Regionen, Handlungsfelder und Klimawirkungen sowie Muster der Anpassungskapazitäten und Handlungserfordernisse zu identifizieren.

### Gesamtbetrachtung der Klimarisiken ohne Anpassung

Auf der Ebene der Klimawirkungen wird eine deutliche Zunahme der Klimarisiken bis zum Ende des Jahrhunderts erwartet. So können zur Mitte des Jahrhunderts (im pessimistischen Fall) mehr als ein Drittel aller untersuchten Klimawirkungen hohe Klimarisiken aufweisen. Zum Ende des Jahrhunderts (im pessimistischen Fall) können bei mehr als der Hälfte der Klimawirkungen hohe Klimarisiken vorliegen. Im optimistischen Fall werden die Klimarisiken deutlich geringer bewertet: Zur Mitte des Jahrhunderts zeigen nur zwei Klimawirkungen ein hohes Klimarisiko. Bis zum Ende des Jahrhunderts werden jedoch auch im optimistischen Fall für über ein Viertel aller Klimawirkungen hohe Risiken eingeschätzt.

Auch die Klimarisiken, bewertet auf Ebene der Handlungsfelder insgesamt, können bis zum Ende des Jahrhunderts größtenteils deutlich zunehmen. Nahezu alle Handlungsfelder können bis dahin im pessimistischen Fall mittel-hohe oder hohe Klimarisiken aufweisen. Besonders viele Klimawirkungen mit hohem Klimarisiko gehören zu den Handlungsfeldern „Biologische Vielfalt“, „Wald- und Forstwirtschaft“, „Wasserhaushalt, Wasserwirtschaft“ und „Küsten- und Meereschutz“, „Bauwesen“ und „Menschliche Gesundheit“. Als weniger stark beeinträchtigt werden die Handlungsfelder „Energiewirtschaft“ und „Industrie und Gewerbe“ eingeschätzt.

Die ermittelten Klimarisiken wurden auch in Bezug auf die vier Schutzgüter Mensch, Volkswirtschaft, Umwelt und kulturelles Erbe ausgewertet. Hier wird deutlich, dass vergleichsweise viele Klimawirkungen des Schutzgutes Umwelt im pessimistischen Fall in den Zeiträumen Mitte und Ende des Jahrhunderts mit hoch bewertet wurden. Dies zeigt die hohe Betroffenheit aquatischer und landgebundener Ökosysteme und betrifft beispielsweise Klimawirkungen in den Bereichen Bodenerosion, Verlust an genetischer Vielfalt oder Rückgang der Bestände an Arten, Schäden an Ökosystemen wie Wälder oder naturräumliche Veränderungen. Auch die Klimawirkungen, die dem Schutzgut kulturelles Erbe zugeordnet wurden, können insbesondere für das Ende des

Jahrhunderts überdurchschnittlich oft ein hohes Klimarisiko aufweisen. Hierbei handelt es sich größtenteils um Klimarisiken mit Bezug zu Kulturlandschaften, Landschaftsgärten sowie bauliche Kulturgüter.

Die zeitliche Dynamik bei den Handlungsfeldern ist unterschiedlich und sollte bei der Anpassungsplanung berücksichtigt werden: Vergleichsweise geringe Klimarisiken in der Gegenwart verbunden mit einem hohen Anstieg der Klimarisiken bis zum Ende des Jahrhunderts (Handlungsfelder „Biologische Vielfalt“, „Fischerei“, „Tourismuswirtschaft“) könnten zu einer Unterschätzung der langfristigen Risiken führen. Frühzeitig hohe Klimarisiko-Bewertungen könnten verdecken, dass die Risiko-Entwicklung noch weiter fortschreitet und bis zum Ende des Jahrhunderts noch stark zunimmt.

Im Vergleich der Ergebnisse der KWRA 2021 mit denen der VA 2015 zeigt sich, dass die Klimarisiko-Profile je Handlungsfeld und auch bei den meisten Klimawirkungen in ähnlicher Weise bestehen bleiben. Dies deutet auf die Robustheit der grundsätzlichen Methodik hin. Der Wissenszuwachs zwischen VA 2015 und KWRA 2021 hat eine deutlich ausdifferenziertere Betrachtung der Klimawirkungen ermöglicht, also eine höhere Zahl von analysierten Klimawirkungen. Im Vergleich zwischen VA 2015 und KWRA 2021 hat sich bei knapp der Hälfte der Klimawirkungen und der Handlungsfelder das bewertete Risiko erhöht. Gründe für die höhere Bewertung der KWRA 2021 gegenüber der VA 2015 sind vermutlich der weiter in die Zukunft verlagerte Bewertungszeitraum, die ungünstigeren Klimaprojektionen, der bessere Kenntnisstand und die geschärfte Wahrnehmung des Klimawandels. Bei etwa einem Drittel der Klimawirkungen und Handlungsfelder veränderte sich die Bewertung nicht.

### **Handlungsfeldübergreifende Auswertung**

Neben der Gesamtbetrachtung der Klimarisiken ohne Anpassung erfolgte eine handlungsfeldübergreifende Auswertung der klimatischen Einflüsse, Sensitivitätsfaktoren, Gewissheiten und Querverbindungen der Klimawirkungen der 13 Handlungsfelder.

In der Auswertung der klimatischen Einflüsse zeigte sich, dass die sechs klimatischen Einflüsse durchschnittlicher Temperaturanstieg, Hitze, Trockenheit, Starkregen, durchschnittliche Niederschlagsabnahme und Starkwind einen Großteil der 102 untersuchten Klimawirkungen beeinflussen. Diese Identifikation der vorrangigen klimatischen Einflüsse scheint robust, da sie sich auch bei Betrachtung verschiedener Teilaspekte wie Klimawirkungen mit hohen Klimarisiken oder Schutzgütern nicht ändert. Bei der Betrachtung der hohen Klimarisiken zeigt sich eine höhere Relevanz der klimatischen Einflüsse Trockenheit und durchschnittliche Niederschlagsabnahme im Vergleich zur Betrachtung der Gesamtmenge aller Klimawirkungen.

Klimawirkungen im Schutzgut Umwelt werden besonders häufig durch Trockenheit beeinflusst. Sie sind zudem überdurchschnittlich vielen klimatischen Einflüssen ausgesetzt und damit vielfach durch den Klimawandel betroffen. Die Ergebnisse der Auswertung zeigen zudem, dass sich graduell verändernde Klimatelemente, wie der Temperaturanstieg, genauso relevant für Klimawirkungen sind wie solche, die Extremereignisse abbilden.

Neben den klimatischen Einflüssen sind Sensitivitätsfaktoren, wie etwa die Nutzungsintensität von Böden, der Versiegelungsgrad, die Artenzusammensetzung von Ökosystemen oder soziodemographische Strukturen, in der Regel die wichtigste Komponente für die Ausprägung von Klimawirkungen. Die Ergebnisse des Quervergleichs der Sensitivitäten zeigen, dass die Sensitivität der vom Klimawandel betroffenen Systeme sehr heterogen und abhängig von dem System selber sowie von dem klimatischen Einfluss ist. Es gibt daher eine hohe Zahl verschiedener Sensitivitätsfaktoren. Bestimmte Sensitivitätsfaktoren, insbesondere solche, die der Land- und Wassernutzung zuzuordnen sind, treten häufiger in einigen Handlungsfeldern auf. Sie werden für

den Erfolg von Anpassung an den Klimawandel eine größere Rolle spielen. Handlungsfeldübergreifende Ansätze sind hier potentiell bedeutsam.

Die meisten Sensitivitätsfaktoren betreffen die Nutzung und Beanspruchung natürlicher Ressourcen, insbesondere Wasser und Landfläche. Mit Blick auf die Anpassung an den Klimawandel ist damit ein verstärkter Schutz natürlicher Ressourcen vor anthropogener Überbeanspruchung oder Übernutzung zentral.

Die handlungsfeldübergreifende Auswertung der Gewissheit hat gezeigt, dass der durchschnittliche Grad der Gewissheit der Bewertung der Klimarisiken, bezogen auf den Zeitraum „Mitte des Jahrhunderts“, bei mittel und bezogen auf den Zeitraum „Ende des Jahrhunderts“ bei gering liegt. Die Bewertungen der Klimarisiken erscheinen somit für die nahe Zukunft robuster, wobei auch hier Unsicherheiten vorliegen.

Sehr geringe bis geringe Gewissheiten bei der Bewertung finden sich größtenteils bei Klimarisiken mit komplexen Wirkzusammenhängen und/oder einer hohen Anzahl an sozioökonomischen Einflussfaktoren. Hier besteht insbesondere weiterer Forschungsbedarf. Klimarisiken der Handlungsfelder „Boden“ und „Wasserhaushalt, Wasserwirtschaft“ weisen im Durchschnitt vergleichsweise geringe Gewissheiten auf, da sie oft durch viele Einflussfaktoren und komplexe, teils sehr dynamische Wirkzusammenhänge geprägt sind. Dies erhöht die Unsicherheiten in den Einschätzungen der Klimarisiken in diesen Handlungsfeldern.

Hohe Gewissheiten bestehen hingegen bei den Bewertungen der Klimarisiken der Handlungsfelder „Landwirtschaft“ und „Bauwesen“, weil bei diesen vermutlich schon ein vergleichsweise guter Kenntnisstand hinsichtlich möglicher Klimafolgen vorliegt. Klimawirkungen mit hoch bewerteten Klimarisiken weisen tendenziell eine höhere Gewissheit bei der Bewertung auf. Dies deutet, insbesondere für die Mitte des Jahrhunderts, auf eine solide Kenntnislage als Grundlage für mögliche Anpassung hin.

Neben den bisher aufgeführten handlungsfeldübergreifenden Aspekten, wurden auch Verknüpfungen der Handlungsfelder und Klimawirkungen ausgewertet. Ergeben sich durch die Folgen des Klimawandels negative Auswirkungen für eine Klimawirkung, so wirkt sich dies oft indirekt auch auf weitere nachgelagerte Klimawirkungen aus. Die Auswertung der Querverbindungen verdeutlicht, welche Klimawirkungen und aggregiert auch Handlungsfelder sich auf besonders viele andere Klimawirkungen beziehungsweise Handlungsfelder auswirken (ausgehende Wirkbeziehungen) oder welche andersherum von besonders vielen beeinflusst werden (eingehende Wirkbeziehungen). Insgesamt wurden 257 Querverbindungen zwischen den 102 Klimawirkungen der 13 Handlungsfelder identifiziert.

Ausgehende Wirkbeziehungen finden sich vor allem bei natürlichen Systemen und Ressourcen in den Handlungsfeldern „Wasserhaushalt, Wasserwirtschaft“, „Küsten- und Meeresschutz“, „Boden“ und „Biologische Vielfalt“. Eingehende Wirkbeziehungen betreffen besonders naturnutzende Wirtschaftssysteme, Infrastrukturen und Gebäude sowie Menschen und soziale Systeme („Tourismuswirtschaft“, „Industrie und Gewerbe“, „Landwirtschaft“ und „Menschliche Gesundheit“).

Betrachtet man allein die hohen Klimarisiken, so bestehen die meisten Querbezüge im Handlungsfeld „Biologische Vielfalt“. Die vielen hier eingehenden Wirkbeziehungen weisen auf die breite Gefährdung durch den Klimawandel hin. Die Klimawirkung „Verschiebung von Arealen und Rückgang der Bestände“ nimmt eine zentrale Position mit vielen ausgehenden und eingehenden Wirkbeziehungen ein.

In urbanen Räumen scheint es eine enge Verknüpfung der Wirkbeziehungen zwischen den Klimawirkungen „Hitzebelastung“, „Bedarf an Kühlenergie“ und „Stadtklima/Wärmeinseln“ und dadurch sogar einen sich selbst verstärkenden Rückkopplungskreislauf zu geben.

### **Auswertung räumlicher Muster**

Im Rahmen der Auswertung räumlicher Muster wurden Karten erzeugt, die Deutschland in homogene Klimaräume aufteilen und zeigen, wie sich das Klima über mehrere Klimaindikatoren hinweg in Zukunft verändern kann. Dafür wurden Klimaraumtypen<sup>1</sup> für den Bezugszeitraum (1971 bis 2000), die Mitte des Jahrhunderts (2031 bis 2060) und das Ende des Jahrhunderts (2071 bis 2100) berechnet.

Die Berechnung der Klimaraumtypen mittels Clusteranalyse ergab die Unterteilung in sieben Klimaraumtypen. Um das Klima des Bezugszeitraums für jedes Cluster zu beschreiben und um die für jedes Cluster relevantesten Indikatoren zu identifizieren, wurde für jeden Indikator der Mittelwert aller Rasterzellen innerhalb eines Clusters bestimmt. Entsprechend der Mittelwerte der Indikatoren, der geographischen Lage und der Topographie wurden den sieben Clustern Namen zugeordnet:

- ▶ Für das Klima der „Küsten“ sind in Zukunft ein vergleichsweise geringer Temperaturanstieg, der zu weniger Frosttagen führt, und geringe durchschnittliche Niederschlagsänderungen, aber deutlich mehr Starkregentage zu erwarten, mit einer Tendenz zu feuchteren Wintern.
- ▶ Auch im gemäßigten Klima des „Nordwestens“ wird es zukünftig zu einem vergleichsweise moderaten Temperaturanstieg und weniger Frosttagen kommen, aber mit deutlich häufigeren Temperaturextremen als an der Küste. Wie an der Küste sinkt die Anzahl der Frosttage und steigt die Anzahl der Starkregentage.
- ▶ Die „Trockenste Region“, zu welcher große Teile Ostdeutschlands und Teile der Mitte von Deutschland gehören, wird auch zukünftig die trockenste in Deutschland bleiben. Trotzdem steigen die Starkregentage. Die Erwärmung und Veränderung des Niederschlags liegen im deutschen Durchschnitt. Die Anzahl der Hitzetage und die der tropischen Nächte steigen überdurchschnittlich.
- ▶ Die „Wärmste Region“, vor allem im Westen und dem äußersten Osten Deutschlands zu finden, weist die höchsten mittleren Temperaturen und meisten Hitzetage und tropischen Nächte in Deutschland auf. Für diese Region ist der größte Zuwachs an heißen Tagen und Tropennächten zu erwarten. Gleichzeitig kann dort der mittlere Niederschlag im Winter relativ stark zunehmen.
- ▶ Das Klima des „Südostens“, der von Baden-Württemberg bis Sachsen reicht, wird sich in Zukunft voraussichtlich mit am stärksten erwärmen; es wird deutlich mehr Hitzetage geben. Im Sommer ist außerdem mit zurückgehenden Niederschlägen und häufigeren Trockenperioden zu rechnen.
- ▶ Im Bereich des kühl-gemäßigten Klimas der "Mittelgebirge" können in Zukunft die Niederschläge im Winter sowie ganzjährig die Starkregentage deutlich zunehmen, während im Sommer die Niederschläge stark zurückgehen und die Anzahl der Trockentage zunimmt.

---

<sup>1</sup> Klimaraumtypen sind hinsichtlich ihres Klimas relativ homogene, voneinander abgrenzbare Räume, die mittels einer Clusteranalyse identifiziert wurden.

- ▶ Für das Klima des "Gebirges" wird eine Zunahme der Trockentage im Sommer und der Winterniederschläge prognostiziert, die dann auf Grund der höheren Temperaturen verstärkt als Regen fallen werden. Auch die Starkregentage können überdurchschnittlich zunehmen, während Frosttage überdurchschnittlich abnehmen. Die absolute, durchschnittliche Erwärmung und der relative Anstieg an Hitzetagen sind hier voraussichtlich am größten.

Die größten Änderungen über alle Klimaraumtypen hinweg zur Mitte des Jahrhunderts (Absolutwerte und relative Änderungen) sind im mittleren Niederschlag im Winter, in der Anzahl der Heißen Tage sowie tropischen Nächten sowie den Frosttagen festzustellen. Die insgesamt größten Änderungswerte für das Ende des Jahrhunderts sind wie in der Mitte des Jahrhunderts bei der Anzahl an Heißen Tagen und Tropischen Nächten sowie den Frosttagen festzustellen.

Zusätzlich zur Analyse der Klimaraumtypen wurden sogenannte klimatische Hotspot-Karten erstellt. Diese bilden jene Räume in Deutschland ab, in denen einzelne Klimaindikatoren besonders hohe Werte oder besonders starke Änderungen aufweisen. Gewichtete aggregierte klimatische Hotspot-Karten zeigen somit die Regionen in Deutschland, die besonders durch den Klimawandel infolge von hohen Klimaextremen oder starken Klimaänderungen betroffen sind. Hierbei ist hervorzuheben, dass ausschließlich meteorologische Variablen in diese Analysen eingeflossen sind. Hinzu kommt, dass die Flusstäler durch Folgen von Hochwasser betroffen sein können und an der Küste die Gefahren durch den Meeresspiegelanstieg in der zweiten Hälfte des 21. Jahrhunderts deutlich zunehmen werden.

Die Ergebnisse zeigen, dass sich klimatische Hotspots insbesondere im Süden, Südwesten und Osten Deutschlands befinden. Verschiedene urbane Agglomerationsräume sind deutlich betroffen. Zum Ende des Jahrhunderts werden die klimatischen Hotspots deutlich intensiver und dehnen sich stark aus. Besonders viele klimatische Hotspot-Regionen finden sich dann im Süddeutschland und im Westen, betroffen ist aber faktisch das gesamte Bundesgebiet.

### **Gesamtbetrachtung der Klimarisiken mit Anpassung**

Die fachliche Analyse der Anpassungskapazität erfolgte für 33 ausgewählte Klimarisiken und für alle 13 Handlungsfelder anhand der Einschätzung der Wirksamkeit der beschlossenen Anpassungsmaßnahmen (APA III) und der weiterreichenden Anpassung. Die Analyse zeigt grundsätzlich, wie weit einzelne Klimarisiken durch die beschlossenen Maßnahmen (APA III) reduziert werden können, wo Bedarf nach weiterreichender Anpassung besteht und wo auch bei einer weiterreichenden Anpassung noch hohe Klimarisiken gegeben sind.

Im Zeitraum 2020 bis 2030 und auch im Zeitraum danach wird den beschlossenen Maßnahmen, die die im APA III formulierten Anpassungsinstrumente des Bundes und vereinzelt weitere geplante Anpassungsmaßnahmen berücksichtigen, teils nur ein geringes Potential für die Reduktion der Klimarisiken ohne Anpassung zugemessen. Dies hat mehrere Gründe:

- ▶ Die Anpassungsdauer wird bei den ausgewählten Klimarisiken fast immer als mittel bis lang eingestuft, das heißt es wird deutlich mehr als zehn Jahre dauern, die Klimarisiken großräumig in Deutschland wirksam zu reduzieren.
- ▶ Klimaanpassung ist eine Gemeinschaftsaufgabe, die eines koordinierten Handelns auf allen staatlichen und nicht-staatlichen Ebenen bedarf, um eine klimaresiliente Gesellschaft zu erreichen. Bei vielen Klimawirkungen ist der Bund lediglich für die politische Rahmensetzung zuständig. Hauptakteure und wesentliche Ebene für die Umsetzung sind Länder, Kommunen und die Zivilgesellschaft.



- ▶ Die beschlossenen Anpassungsmaßnahmen des Bundes umfassen im Sinne der Rahmensezung häufig weiche Instrumente und Maßnahmen (zum Beispiel zur Forschung, Kommunikation und Kooperation), die wichtige Grundlagen für eine wirksame Anpassung liefern, aber für eine effektive Reduzierung des Klimarisikos nicht ausreichen und von anderen Akteuren aufgegriffen werden müssen.
- ▶ Wegen des wachsenden Wissensfortschritts werden in der KWRA 2021 mehr Klimawirkungen analysiert und teils als höhere Risiken bewertet als in der Vulnerabilitätsanalyse 2015. Dieser Wissensfortschritt ist im APA III noch nicht abgebildet, da die dort beschlossenen Maßnahmen – zeitlich folgerichtig – an die VA 2015 gekoppelt waren. Daher wurden manche der ausgewählten Klimarisiken kaum im APA III adressiert.

Im optimistischen Fall auf Handlungsfeldebene zeigen die Bewertungsergebnisse für die Mitte des Jahrhunderts nach Umsetzung der beschlossenen Maßnahmen (APA III) geringe beziehungsweise gering-mittlere Restrisiken und unter der Annahme weiterreichender Anpassung in allen Handlungsfeldern geringe Restrisiken.

Im optimistischen Fall wird auf der Ebene der einzelnen Klimawirkungen fast durchweg erwartet, dass bis 2060 die Klimarisiken ohne Anpassung entweder im Vergleich zur Gegenwart nicht steigen oder dass der Anstieg durch die beschlossenen Maßnahmen kompensiert werden kann, so dass die Restrisiken nicht höher sind als die Klimarisiken ohne Anpassung im Gegenwartszeitraum. In vielen Fällen kann sich nach Wirksamwerden der beschlossenen Maßnahmen sogar eine bessere Situation als gegenwärtig (Überkompensation durch beschlossene Maßnahmen) ergeben. Begründet werden kann dies durch den längeren Zeitraum bis zum Wirksamwerden der beschlossenen Anpassungsmaßnahmen sowie eine höhere Risikoreduzierung als im Zeitraum 2020 bis 2030. Wenn weiterreichende Anpassung bis 2060 berücksichtigt wird, werden im optimistischen Fall weitgehend geringe Klimarisiken erwartet.

Im pessimistischen Fall wird auf Handlungsfeldebene in fast allen Handlungsfeldern nach Umsetzung der beschlossenen Maßnahmen mit höheren Restrisiken als im optimistischen Fall gerechnet. Bereits zur Mitte des Jahrhunderts können die Klimarisiken nach beschlossenen Anpassungsmaßnahmen in den Handlungsfeldern „Landwirtschaft“ und „Wald- und Forstwirtschaft“ hoch bleiben. Im Handlungsfeld „Biologische Vielfalt“ sowie in den Handlungsfeldern „Fischerei“, „Wasserhaushalt, Wasserwirtschaft“ und „Küsten- und Meeresschutz“ können mittel-hohe Restrisiken verbleiben. Diese relativ hohen Restrisiken zeigen, dass natürliche Systeme beziehungsweise Systeme, die natürliche Ressourcen nutzen, von einer pessimistischen Szenarienkombination nicht nur besonders negativ beeinträchtigt wären, sondern dann auch die Notwendigkeit weiterreichender Anpassung besteht. In fast allen Handlungsfeldern können die Restrisiken nach beschlossenen Maßnahmen durch weiterreichende Maßnahmen reduziert werden. Infolge weiterreichender Anpassung können im pessimistischen Fall vor allem in den Handlungsfeldern „Landwirtschaft“ und „Industrie- und Gewerbe“ die Restrisiken deutlich gesenkt werden. Hingegen werden in den Handlungsfeldern „Fischerei“ und „Wald- und Forstwirtschaft“ im pessimistischen Fall auch nach einer weiterreichenden Anpassung mittel-hohe Restrisiken erwartet.

Im pessimistischen Fall zeigt sich auch auf Ebene der Klimawirkungen für den Zeitraum bis 2060, dass die beschlossenen Maßnahmen viele Klimarisiken (teils deutlich) reduzieren können. Dennoch ergeben sich aus der Expertenbewertung mehrheitlich mittel-hohe und hohe Klimarisiken nach Umsetzung der beschlossenen Anpassungsmaßnahmen. Ein Grund dafür ist die für den pessimistischen Fall angenommene deutliche Steigerung der Klimarisiken ohne Anpassung infolge eines stärkeren Klimawandels (gegenüber dem Gegenwartszeitraum). Ein weiterer Grund ist, dass gleichzeitig dieser stärkere Klimawandel die Wirksamkeit von Anpassungsmaßnahmen

in vielen Fällen einschränkt. Die Wirksamkeit von Anpassungsmaßnahmen hängt also auch von der Stärke des Klimawandels ab, auf den die Maßnahme trifft.

Im pessimistischen Fall könnte weiterreichende Anpassung die Klimarisiken im Vergleich zu der Anpassung durch die beschlossenen Maßnahmen oft stärker senken. Besonders in den Handlungsfeldern „Landwirtschaft“ und „Küsten- und Meeresschutz“, bei einzelnen Klimawirkungen im Handlungsfeld „Boden“ (Winderosion, Wassermangel im Boden) sowie bei nahezu allen Klimawirkungen mit Infrastrukturbezug und im Handlungsfeld „Menschliche Gesundheit“ können die Klimarisiken durch weiterreichende Anpassung deutlich geringer sein als die Klimarisiken ohne Anpassung. Hohe Restrisiken werden hingegen trotz weiterreichender Anpassung bei Klimawirkungen erwartet, bei denen Hitze- und Trockenheitsschädigung und deren Folgewirkungen eine Rolle spielen (zum Beispiel Schaderreger in der Forstwirtschaft) oder bei Klimawirkungen in komplexen natürlichen Systemen (zum Beispiel im Handlungsfeld „Fischerei“, bei den Klimawirkungen „Grundwasserstand und Grundwasserqualität“ und „Ausbreitung von invasiven Arten“). Bei diesen Klimawirkungen können (auch weiterreichende) Anpassungsmaßnahmen lediglich an Teilsystemen oder Teilflächen ansetzen. Sie können nicht umfassend auf die gesamte Dynamik des Systems einwirken. Die mittel-hohen bis hohen Restrisiken bei vielen Klimawirkungen auch nach Anpassung im pessimistischen Fall weisen darauf hin, dass eine Anpassung bei einem schwachen Klimawandel, wie im optimistischen Fall, effektiver ist als bei einem starken Klimawandel und damit auf die Notwendigkeit von Klimaschutzmaßnahmen für eine effektive Anpassung.

Bei drei Klimawirkungen im Handlungsfeld „Biologische Vielfalt“ und „Boden“ kann Anpassung aufgrund fehlender Möglichkeiten oder physischer Belastungsgrenzen von Organismen an absolute Grenzen der Anpassung stoßen. Bei anderen Klimawirkungen in den Clustern Land und Wasser werden im pessimistischen Fall voraussichtlich transformative Ansätze benötigt, um die Klimarisiken nach Anpassung auf mittel oder niedriger reduzieren zu können.

Insbesondere in Bereichen, in denen sich Klimarisiken auch durch weiterreichende Anpassung nicht oder kaum reduzieren lassen, zum Beispiel bei natürlichen Systemen wie Wäldern, Böden, terrestrischen oder aquatischen Ökosystemen, ist es ratsam, deren Beeinträchtigung in Folge von anthropogener (Über-) Nutzung zu minimieren, um die Resilienz solcher betroffenen Systeme zu stärken.

### **Identifizierung und Charakterisierung von Handlungserfordernissen**

Durch die Ermittlung von Handlungserfordernissen wurde herausgestellt, wo zukünftig Handlungsbedarf besteht und wie dieser gestaltet werden könnte<sup>2</sup>.

Insgesamt wurden 31 Wirkungen des Klimawandels mit sehr dringendem Handlungsbedarf identifiziert. Bei einem starken Klimawandel drohen dort hohe Klimarisiken, während die Anpassung der bedrohten Systeme viel Zeit braucht. Sie lassen sich zu folgenden Bereichen zusammenfassen:

- ▶ Folgen von extremer Hitze auf die Gesundheit, besonders in Städten, vorrangig entlang des Rheins und der Spree, den wärmsten Regionen Deutschlands.

---

<sup>2</sup> Keine Anpassungsmöglichkeiten werden bei den sogenannten rein vorgelagerten Klimawirkungen auf der Ebene physischer Veränderungen von natürlichen Systemen gesehen. Hierzu gehört beispielsweise der Meeresspiegelanstieg selbst. Die rein vorgelagerten Klimawirkungen wurden daher nur hinsichtlich des Klimarisikos ohne Anpassung bewertet.



- ▶ Folgen von Trockenheit und Niedrigwasser (häufig verbunden mit Hitze) auf alle wassernutzenden und wasserabhängigen Systeme, besonders betroffen sind ländliche Regionen, vorrangig in den trockenen Regionen im Osten und in der westlichen Mitte Deutschlands, aber auch Industriestandorte.
- ▶ Folgen von Starkregen, Sturzfluten und Hochwasser besonders für Infrastrukturen und Gebäude, vorrangig betroffene Regionen sind Siedlungen in der Nähe von Gewässern sowie in engen Tälern der Mittelgebirge.
- ▶ Folgen des graduellen Temperaturanstiegs, wie der Meeresspiegelanstieg, auf natürliche und naturnutzende Systeme, besonders an den Küsten, in den Gewässern, im ländlichen Raum und im Gebirge.

Außerdem wurden 23 dringende Handlungserfordernisse identifiziert.

Nur für die sehr dringenden Handlungserfordernisse wurde die Anpassungskapazitäten und damit die Restrisiken untersucht, die je nach optimistischem und pessimistischem Fall und nach Ausmaß der Anpassung unterschiedlich hoch ausfallen. Auf dieser Basis sowie der weiteren Analyse der Anpassungskapazitäten und den Aussagen zu Gewissheiten bei den Bewertungen wurden zu den sehr dringenden Handlungserfordernissen ergänzende Aussagen getroffen, die folgende Fragestellungen adressieren:

- ▶ Reichen die beschlossenen Maßnahmen im optimistischen und im pessimistischen Fall aus, um das Restrisiko auf ein bestimmtes, gesetztes Niveau zu reduzieren?
- ▶ Reichen die weiterreichenden Maßnahmen im optimistischen und im pessimistischen Fall aus, um das Restrisiko auf ein bestimmtes, gesetztes Niveau zu reduzieren?
- ▶ Wie sicher sind die getroffenen Aussagen?

Anhand dieser Fragen können die Klimawirkungen mit sehr dringenden Handlungserfordernissen in fünf Gruppen unterteilt werden:

- I. **Umsetzung:** In dieser Kategorie reichen die beschlossenen Maßnahmen aus, um das Klimarisiko durch Anpassung auf ein zuvor festgesetztes Restrisiko zu reduzieren. Bei Klimawirkungen in dieser Gruppe geht es insbesondere darum, die Umsetzung der bestehenden Planungen sicherzustellen. Dies kann etwa darauf hinzielen, die Finanzierung der Maßnahmen zu gewährleisten, ein laufendes Monitoring durchzuführen oder zu klären, dass Akteure jenseits der Ebene des Bundes in ausreichendem Maße in die Implementierung der Maßnahmen eingebunden sind.
- II. **Entwicklung:** Bei dieser Kategorie reichen die beschlossenen Maßnahmen zum Erreichen des anvisierten Restrisikos nicht aus, sodass darüber hinausgehende, weiterreichende Maßnahmen in Betracht gezogen werden müssen. Neben der Umsetzung der beschlossenen Maßnahmen geht es also vor allem um die Entwicklung und Implementierung neuer Maßnahmen. Die weiterreichenden Maßnahmen sollten bei der Anpassungsplanung berücksichtigt werden, auch wenn sie gegebenenfalls mit (deutlichen) zusätzlichen Kosten verknüpft sind und nur im Falle des Klimawandels Vorteile erbringen (high-regret).
- III. **Entwicklung unter Unsicherheit:** Bei dieser Gruppe von Klimawirkungen mit sehr dringenden Handlungserfordernissen ist die Gewissheit bei der Bewertung des Restrisikos gering, sodass sich weitere Forschung zur Entwicklung und vor beziehungsweise zum Aufgreifen weiterreichender Maßnahmen empfiehlt. Gleichzeitig ist es erforderlich, die Umsetzung der beschlossenen Maßnahmen sicherzustellen.

- IV. **Innovation:** Bei Klimawirkungen mit sehr dringenden Handlungserfordernissen aus dieser Gruppe ist es relativ sicher, dass das Ziel der Anpassung, das Restrisiko auf ein bestimmtes vorgegebenes Maß zu verringern, selbst bei der Umsetzung aller beschlossenen und weiterreichenden Maßnahmen nicht erreicht wird. Soweit möglich ist hier tiefgreifende Anpassung in Betracht zu ziehen. Hierzu gilt es, Forschung zu entsprechenden Anpassungsansätzen voranzutreiben sowie einen fachlichen und gegebenenfalls gesellschaftlichen Diskurs zur Notwendigkeit solcher tiefgreifenden Anpassungsmaßnahmen und dafür notwendige Veränderungen in den Rahmenbedingungen zu starten.
- V. **Innovation unter Unsicherheit:** Für Klimawirkungen mit sehr dringenden Handlungserfordernissen, die dieser Kategorie zuzuordnen sind, ist das vorhandene Wissen noch gering. Dennoch scheint es so, dass das Ziel der Anpassung nicht erreicht werden kann. Weitere intensive Forschung sowohl mit Blick auf mögliche weiterreichende Anpassungsmaßnahmen als auch mit Blick auf tiefgreifende Anpassung erscheint sinnvoll. Darüber hinaus empfiehlt sich die Umsetzung beschlossener Maßnahmen und die Einbeziehung weiterreichender Maßnahmen in die Anpassungsplanung.

Welche Klimawirkung, in welche Gruppe eingeordnet wird, hing davon ab, welches Restrisiko im optimistischen oder im pessimistischen Fall akzeptiert werden sollte, sowie welcher Grad von Gewissheit akzeptiert wird, um ohne weitere Forschung die Anpassungsmaßnahmen umzusetzen. Im Rahmen der Untersuchung erfolgte eine beispielhafte Zuordnung auf der Basis folgender (normativ gesetzter) Vorgaben:

- ▶ Im optimistischen Fall soll ein gering-mittleres Restrisiko nicht überschritten werden.
- ▶ Im pessimistischen Fall soll ein mittleres Restrisiko nicht überschritten werden und
- ▶ Der Schwellenwert für die Gesamtgewissheit wird auf mittel gesetzt. Klimawirkungen bei denen der Wert darüber liegt, fallen in die Gruppen mit Unsicherheit.

Auf der Basis dieser Setzungen waren der Kategorie „Umsetzung“ vier Klimawirkungen aus unterschiedlichen Handlungsfeldern zugeordnet, insgesamt also nur ein kleiner Anteil aller Klimawirkungen mit sehr dringenden Handlungserfordernissen. Die meisten der Klimawirkungen mit sehr dringenden Handlungserfordernissen konnten der Gruppe „Entwicklung“ zugeordnet werden, das heißt, hier wurden bei der weiterreichenden Anpassung ausreichend hohe Potentiale gesehen, um die Restrisiken entsprechend der normativen Setzung reduzieren zu können. Eine relativ hohe Anzahl von Klimawirkungen (13) entfiel allerdings auch auf die Gruppen „mit Unsicherheit“. Hier besteht also – unter der gesetzten Vorgabe zur Gesamtgewissheit – noch deutlicher Forschungsbedarf.

Neben dieser Art der Charakterisierung der Handlungserfordernisse, erfolgt eine weitere Qualifizierung mit Blick auf Handlungspotentiale in den sechs untersuchten Anpassungsdimensionen (Wissen, Motivation und Akzeptanz, Technologie und natürliche Ressourcen, Finanzielle Ressourcen, Institutionelle Strukturen und personelle Ressourcen, Rechtliche Rahmenbedingungen und politische Strategien).

Die Auswertung dieser Angaben zeigte, dass die beschlossenen Maßnahmen (APA III) eine starke Ausprägung in der Dimension „Wissen“ aufweisen (das heißt insbesondere durch Wissensgenerierung wird ein Beitrag zur Reduzierung von Klimarisiken geleistet). Zusätzliche Handlungspotentiale für weiterreichende Anpassung bestehen vor allem in den Dimensionen „Motivation und Akzeptanz“, „Rechtliche Rahmenbedingungen und politische Strategien“ und (partiell) „Technologie und natürliche Ressourcen“.

## Querbetrachtung der Systembereiche

Um weitere Erkenntnisse für die Anpassungsplanung zu gewinnen, erfolgte eine Querbetrachtung der Klimawirkungen auch mit Blick auf Systembereiche. Zu diesem Zweck wurden die einzelnen Klimawirkungen fünf Systembereichen zugeordnet.

### ► Natürliche Systeme und Ressourcen

Bei sehr vielen natürlichen Systemen – 60 Prozent der untersuchten Klimawirkungen – erwarten wir bereits Mitte des Jahrhunderts hohe Klimarisiken und die Zahl steigt bis Ende des Jahrhunderts auf 70 Prozent. Insbesondere der graduelle Temperaturanstieg, aber auch Extreme wie Hitze und Trockenheit sowie potenziell auch Starkwind bedrohen die natürlichen Systeme. Die beschlossenen Anpassungsmaßnahmen sind bei diesen Systemen weniger wirksam als bei den Klimawirkungen anderer Systeme. Weiterreichende Anpassung, die allerdings tendenziell auch weniger wirksam ist als in anderen Systembereichen, wird daher stärker benötigt. Die Anpassungsdauer beträgt zumeist mehr als zehn und teils mehr als 50 Jahre, und ist im Durchschnitt deutlich länger als bei den anderen Systembereichen. Bei vier untersuchten Klimawirkungen aus diesem Bereich werden die Grenzen der Anpassung absehbar überschritten, weil Anpassungsmaßnahmen grundsätzlich nicht zur Verfügung stehen. Der Bedarf nach mehr und tiefgreifender Anpassung ist groß, insbesondere für den Erhalt der Biologischen Vielfalt sowie im Bereich des Wasser- und Bodenschutzes. Aus der Kombination von langer Anpassungsdauer und hohen Klimarisiken ergeben sich relativ und absolut gesehen sehr viele (11) sehr dringende Handlungserfordernisse. Hinzu kommen fünf dringende Handlungserfordernisse. Zieht man noch die Klimawirkungen ab, bei denen keine Anpassungsmöglichkeiten bestehen, wird ersichtlich, dass bei fast allen Klimawirkungen, bei denen Anpassung möglich wäre, auch Handlungserfordernisse existieren.

### ► Naturnutzende Wirtschaftssysteme

Die Klimarisiken ohne Anpassung sind in diesem Bereich erkennbar geringer als bei den „Natürlichen Systemen und Ressourcen“ und zwar über alle Zeitscheiben hinweg und sowohl für den optimistischen als auch den pessimistischen Fall. Gleichwohl sind sie keineswegs gering. Knapp ein Drittel der Klimawirkungen weisen zur Mitte des Jahrhunderts im pessimistischen Fall ein hohes Klimarisiko auf und die Zahl kann bis zum Ende des Jahrhunderts auf gut die Hälfte steigen. Trockenstress, aber auch der graduelle Temperaturanstieg spielen hier eine Rolle. Anpassungsmaßnahmen sind in diesem Systembereich bereits vielfach initiiert. Die beschlossenen Anpassungsmaßnahmen werden voraussichtlich deutlich wirksamer sein als bei den „Natürlichen Systemen und Ressourcen“. Auch die Potentiale bei weiterreichenden Anpassungsmaßnahmen sind grundsätzlich höher, wenngleich insgesamt nur etwa im Gesamtdurchschnitt über alle Systembereiche hinweg. Die durchschnittliche Anpassungsdauer in diesem Systembereich liegt zwar im Durchschnitt aller Klimawirkungen, sie streut aber recht stark. Mit zehn Klimawirkungen, die sehr dringenden Handlungserfordernisse aufweisen, gibt es in diesem Systembereich absolut gesehen besonders viele Fälle, relativ gesehen sind es allerdings nicht mehr als in anderen Systembereichen auch. Hinzu kommen sechs Klimawirkungen mit dringendem Handlungsbedarf.

### ► Infrastrukturen und Gebäude

Die Klimarisiken ohne Anpassung sind in diesem Bereich deutlich niedriger als der Durchschnitt aller Klimawirkungen – über alle Zeitscheiben hinweg und für beide Fälle (optimistisch und pessimistisch). Klimarisiken entstehen häufig im Zusammenhang mit Starkregen, Überschwemmungen und Überflutungen und damit verbunden Unterspülungen und Hangrutschungen. Zudem kommen hier Hitze und der Meeresspiegelanstieg zum Tragen. Den tendenziell geringeren

Klimarisiken steht eine besonders hohe Wirksamkeit der Anpassung gegenüber, die wenig davon beeinflusst wird, ob der Klimawandel stärker oder schwächer ausfällt. Sowohl für die Gegenwart als auch für Mitte des Jahrhunderts und mit Blick auf beschlossene wie auch auf weiterreichende Maßnahmen im pessimistischen und im optimistischen Fall sind die Möglichkeiten der Klimaanpassung im Vergleich zu den anderen Systembereichen relativ hoch. Mit seinen sieben sehr dringenden Handlungserfordernissen liegt der Bereich im Durchschnitt aller Bereiche. Die sieben sehr dringenden Handlungserfordernisse sind hingegen überdurchschnittlich viele.

► Naturferne Wirtschaftssysteme

Die Klimarisiken sind insgesamt in diesem Systembereich noch deutlich niedriger als im Systembereich „Infrastrukturen und Gebäude“ und mit Abstand die niedrigsten von allen Systembereichen. Dies gilt über alle Zeitscheiben und in beiden der betrachteten Fälle (pessimistisch und optimistisch). Nur eine Klimawirkung ist zur Mitte des Jahrhunderts bei starkem Klimawandel mit einem hohen Risiko behaftet und nur zwei zum Ende des Jahrhunderts. Zum Anpassungspotential lässt sich bei diesem Systembereich keine Aussage treffen, da nur eine Klimawirkung hierzu untersucht wurde. Angesichts der kurzen Anpassungsdauer und der relativ geringen Klimarisiken ohne Anpassung sind auch die Handlungserfordernisse in diesem Bereich gering: Sehr dringende Handlungserfordernisse existieren nicht, nur zwei dringende.

► Menschen und soziale Systeme

Neben allen ökologischen, technischen und wirtschaftlichen Systemen sind letztlich auch der Mensch selbst und das Gesundheitssystem unmittelbar vom Klimawandel betroffen. Der mit Abstand wichtigste klimatische Einfluss für diesen Systembereich ist Hitze. Auch andere Wetterextreme, insbesondere Sturzfluten bedingt durch Starkregen, oder Stürme spielen eine Rolle, ebenso wie der graduelle Temperaturanstieg. Die Klimarisikosituation ohne Anpassung ist insgesamt ungünstig. Für die Gegenwart weist der Bereich die höchsten Risiken von allen Systembereichen auf. Die Klimawirkung „Hitzebelastung“ ist die einzige aller betrachteten Klimawirkungen, die schon in der Gegenwart mit hoch bewertet wurde. Zur Mitte des Jahrhunderts sind im Falle eines starken Klimawandels ein Drittel der Klimawirkungen in dem Systembereich mit hohem Risiko behaftet. Gegen Ende des Jahrhunderts kann die Zahl aber stark ansteigen. Angesichts der nur wenigen entsprechend untersuchten Klimawirkungen lassen sich keine validen Aussagen zu den Anpassungsmöglichkeiten in dem gesamten Systembereich machen. Mit drei sehr dringenden Handlungserfordernissen liegt der Systembereich im Durchschnitt, mit drei dringenden Handlungserfordernissen allerdings deutlich höher als der Schnitt aller Systembereiche.

Die Analyse nach verschiedenen Systembereichen erlaubt es, verschiedene weitere Schlussfolgerungen zu ziehen, die für die Anpassungsplanung relevant sein können:

Wie aus den bisherigen Ausführungen hervorgeht, ist der Systembereich „Natürliche Systeme und Ressourcen“ grundsätzlich stärker vom Klimawandel betroffen als die anderen Systembereiche. Gleichzeitig ist hier die Anpassungsdauer tendenziell deutlich höher und es kommt hinzu, dass die Wirksamkeit von Anpassungsmaßnahmen vergleichsweise gering ist. Diese Situation ist in sich schon ungünstig. Besonderer Beachtung bedarf sie aufgrund der Verflechtungen der einzelnen Systeme.

Wie schon aus der Analyse der Querverbindungen ersichtlich, gibt es eine relativ enge Verknüpfung zwischen den einzelnen Klimawirkungen und damit auch zwischen Handlungsfeldern und Systembereichen. Diese Verknüpfungen sind nicht gleichmäßig. Die Sortierung nach Systembereichen liefert hier ein recht deutliches Bild: Klimawirkungen aus dem Systembereich „Natürliche Systeme und Ressourcen“ haben viel häufiger ausgehende Wirkbeziehungen, das heißt, sie

sind vorgelagert und wirken auf nachgelagerte Klimawirkungen in anderen Systembereichen ein. Mehr als die Hälfte aller ausgehenden Wirkbeziehungen entfallen auf diesen Systembereich.

Teilweise sind die ausgehenden Effekte unmittelbar bemerkbar für die nachfolgenden Systeme, teilweise werden sich die entsprechenden Wirkungen erst mit Verzögerungen, gegebenenfalls erst viele Jahre später wirklich niederschlagen. Wenn es gelingt, im Bereich der „Natürlichen Systeme und Ressourcen“ die Auswirkungen des Klimawandels einzugrenzen, dann kann dies für sehr viele Klimawirkungen in anderen Systembereichen positive Auswirkungen haben und den Erfolg von Anpassung in den anderen Systembereichen spürbar fördern.

Diese Aussage wird gestützt durch die Untersuchungen zu den Sensitivitätsfaktoren. Auch hier zeigte sich, dass gerade natürliche Faktoren, wie Landnutzung oder Wassernutzung, besonders häufig in verschiedenen Handlungsfeldern und bei vielen Klimawirkungen wichtig für die Empfindlichkeit der betroffenen Systeme sind. Der Schutz dieser Sensitivitätsfaktoren beziehungsweise ihre positive Beeinflussung in Richtung stärkerer Klimaresilienz wirkt sich also in vielfacher Hinsicht positiv aus.

Daher scheint es für die Anpassungsfähigkeit vieler betroffener Systeme wichtig zu sein, vorbeugend zukünftige Zielkonflikte, insbesondere bei der Nutzung von Wasserressourcen wie auch bei der Nutzung von Landressourcen, einzugrenzen. Im Zuge des Klimawandels werden beide Ressourcen künftig verstärkt beansprucht werden. Im Bereich Wasser ist dies bereits offenkundig, bei den Landressourcen wird es in der Zukunft noch deutlicher werden. Hier wird der Raumplanung künftig eine noch gewichtigere Rolle zukommen.

Aufgrund der geschilderten Effekte besteht grundsätzlich ein verstärktes Handlungserfordernis im Bereich der „Natürlichen Systeme und Ressourcen“. Diesem Systembereich scheint eine zentrale Rolle zu zukommen, wenn es darum geht, erfolgreich Klimaanpassung durchzuführen. Neben Klimaschutz scheint daher die hauptsächliche Einwirkungsmöglichkeit darin zu bestehen, die autonome Anpassungsfähigkeit sowie die Funktionsfähigkeiten der Systeme zu stärken und deren Einschränkungen zu reduzieren. Hierfür bedarf es einer grundsätzlichen Entlastung dieser Systeme von aktueller Übernutzung und Überbeanspruchung durch den Menschen.

# 1 Einleitung

## 1.1 Die Klimawirkungs- und Risikoanalyse 2021 (KWRA 2021)

Im Auftrag der Bundesregierung und im Kontext der Deutschen Anpassungsstrategie an den Klimawandel (DAS) wurden mit der KWRA 2021 zum zweiten Mal nach 2015 die mit dem Klimawandel verbundenen zukünftigen Risiken für Deutschland untersucht und bewertet. Diese Untersuchung, die auf Wunsch der Bundesregierung (Bundesregierung 2015) alle sechs Jahre durchgeführt werden soll, ist die umfassendste Klimawirkungs- und Risikoanalyse in Deutschland.

Im Rahmen der mehr als dreijährigen Erstellung der Studie wurden alle wichtigen Themenfelder zum Klimawandel in Deutschland betrachtet und sowohl die unmittelbaren Risiken des Klimawandels als auch die Möglichkeiten, diese Risiken durch Anpassung zu adressieren, analysiert. In die Erstellung der Studie war das Behördennetzwerk „Klimawandel und Anpassung“ eng eingebunden. So ist das Wissen von 25 Bundesoberbehörden und -institutionen aus neun Ressorts sowie das Know-how zahlreicher weiterer Experten und Expertinnen in Deutschland in die Studie eingeflossen.

Das zentrale Ziel der KWRA 2021 ist es, eine wesentliche Grundlage für die Weiterentwicklung der Anpassung in Deutschland zu schaffen, insbesondere für die Entwicklung der nächsten Aktionspläne Anpassung der Bundesregierung. Um dieses Ziel zu erreichen, ist die KWRA 2021 als ein systematischer Screening- und Priorisierungsprozess angelegt worden. Auf Ebene des Bundes schafft die KWRA 2021 einen Überblick, in welchen Handlungsfeldern und bei welchen Klimawirkungen besondere Klimarisiken, Anpassungskapazitäten und Handlungserfordernisse bestehen.

Im Rahmen der KWRA 2021 wurden 13 übergeordnete Handlungsfelder sowie 102 einzelne Klimawirkungen im Hinblick auf die Höhe des Klimarisikos für die Gegenwart, die Mitte des Jahrhunderts und das Ende des Jahrhunderts bewertet. Schwerpunkt der Untersuchung sowohl in Hinblick auf Klimarisiken ohne Anpassung als auch in Hinblick auf die Anpassungskapazität war die Mitte des Jahrhunderts. Um Unsicherheiten bezüglich der Zukunftsaussagen abzubilden, wurden zwei Fälle betrachtet: ein „pessimistischer“ Fall mit einem starken Wandel und ein „optimistischer“ Fall mit einem demgegenüber schwächeren Wandel. Dabei wurden primär Wirkungen des Klimawandels, aber auch Aspekte des sozioökonomischen Wandels berücksichtigt.

Für die größten Klimarisiken wurden Anpassungsmöglichkeiten identifiziert und für den Zeitraum Mitte des Jahrhunderts daraufhin bewertet, wie stark sie zukünftige Klimarisiken senken können. Hierbei wurden auch Unterstützungsmöglichkeiten durch die drei Querschnittsfelder Raumordnung, Bevölkerungsschutz und Finanzwirtschaft berücksichtigt.

Insgesamt konnte auf diese Weise ein sehr vielschichtiges und detailliertes Bild der künftigen Situation Deutschlands, der Risiken und Herausforderungen des Klimawandels, möglicher Ansatzpunkte zur Bewältigung der Risiken, aber auch absehbarer Grenzen bei der Anpassung an den Klimawandel gezeichnet werden.

Die vorrangigen Adressaten der Ergebnisse der KWRA 2021 sind die Bundesministerien, die im Rahmen der Interministeriellen Arbeitsgruppe Anpassung (IMA-A) die DAS und damit die deutsche Anpassungspolitik weiterentwickeln. Weitere Zielgruppen sind Bundesbehörden sowie Länder und Kommunen. Die Ergebnisse und die weiterentwickelte Methodik der KWRA 2021 können ihnen sowie anderen Akteuren in der Wirtschaft und Zivilgesellschaft Informationen für eigene Anpassungsplanungen liefern und für detailliertere Klimawirkungs- und Risikoanalysen



als Vorlage dienen. Der Bericht richtet sich daneben an die Wissenschaft. Sie kann an die skizzierten Forschungsbedarfe anknüpfen. Außerdem stellt die vorliegende Analyse der breiten Öffentlichkeit Informationen zur generellen Verwundbarkeit Deutschlands gegenüber dem Klimawandel bereit.

## 1.2 Die Grenzen der KWRA 2021

Die KWRA 2021 spricht einen sehr breiten Kranz von Klimawandelrisiken an und trifft hierzu Aussagen. Ein wesentlicher Teil der Untersuchung ist außerdem der Analyse der Anpassungskapazität gewidmet. So breit und vielfältig das Spektrum der behandelten Themen und Fragen auch ist, eine Anzahl von Fragen wurden bewusst nicht adressiert.

Ziel der Analyse ist es nicht, auf Basis der identifizierten Klimarisiken konkrete Maßnahmen zur Anpassung herauszuarbeiten oder Empfehlungen diesbezüglich auszusprechen. Die Identifizierung und Ausgestaltung von Anpassungsmaßnahmen sowie ihre Kombination in Maßnahmenbündeln ist Aufgabe nachfolgender Schritte und nicht Gegenstand der KWRA 2021. Letztere stellt hierzu die fachlichen Grundlagen zur Verfügung.

Durch die Breite der vorliegenden Untersuchung können die Ergebnisse der Analyse auch nicht als unmittelbare Grundlage für die regionale oder lokale Anpassungsplanung dienen. Dafür werden detailliertere Risikoanalysen benötigt, die jeweils lokale und sektorale Gegebenheiten beachten. Dies war im Rahmen dieses Berichts nicht möglich.

Aufgabe der KWRA 2021 ist es zudem nicht, bereits sichtbare Klimawirkungen oder den Effekt von Anpassungsmaßnahmen zu untersuchen. Dies erfolgt im Rahmen des Monitoringberichts zur DAS (UBA 2019a) sowie im Rahmen der Evaluation der DAS (UBA 2019b). Die vorliegende Klimawirkungs- und Risikoanalyse ist stattdessen zukunftsgerichtet.

## 1.3 Methodisches Vorgehen

Aufgrund der Vielfalt der Klimawirkungen, der vielen betroffenen Systeme und Akteure und der Zukunftsperspektive ist jede Klimarisikoanalyse mit zahlreichen methodischen Herausforderungen verbunden. Aufbauend auf der Analyse- und Bewertungsmethodik, die bereits für die Vulnerabilitätsanalyse 2015 (VA 2015) erstellt wurde (Buth et al. 2017), wurde der Heterogenität und den Unsicherheiten der Klimawirkungen bei der Konzeption der Methodik der KWRA 2021 dadurch begegnet, dass ein systematischer, mit den Mitgliedern des Behördennetzwerks „Klimawandel und Anpassung“ abgestimmter Analyserahmen für alle Klimawirkungen verwendet wurde. Er baut auf der IPCC-Definition von Klimarisiko auf (Agard et al. 2014), bei der zwischen den Komponenten: Klimatischer Einfluss, räumliche Exposition, Sensitivität und Anpassungskapazität unterschieden wird (siehe Teilbericht 1, „Konzept und Methodik“). Für jede Klimawirkung wurden die wesentlichen Zusammenhänge zusammengefasst und eine Bewertung durchgeführt. Das Klimarisiko ist das Ergebnis der Bewertung der Klimawirkung.

Systematische Grundlage der Untersuchung sind sektorenübergreifende Klimawirkungsketten, die die Wirkbeziehungen zwischen den verschiedenen klimatischen Einflüssen und möglichen Klimawirkungen sowie die Wirkbeziehungen zwischen vor- und nachgelagerten Klimawirkungen abbilden (UBA 2016).

Entscheidend für die Arbeitsweise im Behördennetzwerk war es, dass die fachliche Analyseebene und die normative Bewertungsebene getrennt behandelt wurden. Die fachliche Analyse beruhte auf Literaturanalysen, Indikatoren und Modellergebnissen sowie Interviews mit Experten und Expertinnen, auch außerhalb des Behördennetzwerks, um den aktuellen Wissensstand schriftlich festzuhalten. Basierend auf solchen gemeinsamen Grundlagen haben die Vertreter

und Vertreterinnen der Behörden die Klimarisiken, die Wirksamkeit von Anpassungskapazitäten und die Anpassungsdauer gemeinsam bewertet. Die Bewertung selber erfolgte in aufeinander aufbauenden Bewertungsschritten, so dass ein Priorisierungsprozess stattfinden konnte. Bei der Bewertung wurde einem Delphi-Verfahren gefolgt, um einen weitgehenden Konsens und damit robuste Ergebnisse zu erzielen.

Der zukünftige Klimawandel ist eine der zentralen Herausforderung für gegenwärtige Entscheidungen. Aussagen über die Zukunft sind immer mit Unsicherheiten behaftet, einerseits infolge fehlender Daten und Modellen sowie Wissenslücken und andererseits, weil jede heutige Entscheidung zu einer etwas anderen Zukunft führt. Dies betrifft nicht nur das Klimasystem, sondern auch sozioökonomischen Entwicklungen und deren Begleiterscheinungen (Ressourcenverbrauch, Umweltbelastung). Um dennoch Aussagen über zukünftige Entwicklungen machen zu können, bedient man sich üblicherweise Szenarien. Im Kontext der KWRA 2021 wurden, neben Klimaszenarien des Weltklimarates (so genannte „Representative Concentration Pathways“, RCPs), auch sozioökonomische Szenarien berücksichtigt, die ebenfalls mit Szenarien des Weltklimarates konsistent sind (sogenannte „Shared Socioeconomic Pathways“, SSPs). Auf dieser Basis wurden "pessimistische" und "optimistische" Szenarienkombinationen skizziert, für Deutschland regionalisiert und der Bewertung von Klimawirkungen zugrunde gelegt.

Die Klima- und sozioökonomischen Szenarien sind jedoch nur relativ grobe Grundlagen für die Abschätzung der ganz spezifischen Auswirkungen auf einzelne Handlungsfelder, Systeme und Regionen. Die KWRA 2021 verwendete die Ergebnisse von Wirkmodellen, die für einige Wirkungszusammenhänge vorliegen, sowie Expertenwissen, das nach einem strukturierten Vorgehen abgefragt wurde. Subjektivität und Unsicherheiten spielen in beiden Fällen eine gewisse Rolle, da einerseits Kennwerte festgelegt werden müssen und andererseits Expertenwissen abhängig ist von der Erfahrung und dem Wertesystem der jeweiligen Person.

Die quantitativen Analysen der Klimawirkungen sind nicht immer deckungsgleich mit den qualitativen Bewertungen, zum Beispiel wurde bei der quantitativen Analyse als Gegenwart der Bezugszeitraum (1971 bis 2000) und meist der untere Rand des RCP8.5-Szenarios für den optimistischen Fall verwendet; bei der qualitativen Bewertung hingegen wurde unter dem optimistischen Fall meist die jüngere Gegenwart und ein schwacher Klimawandel verstanden. Dies mindert aber nicht den Wert der Bewertungsergebnisse, sondern macht sie für zukünftiges Anpassungshandeln sogar praktikabler. Aufgrund der Heterogenität der Klimawirkungen und ethischer Fragen beim Vergleich von Schäden an Schutzgütern erfolgte die Bewertung sehr grob in Stufen und es konnte keine sektorenübergreifende quantitative Metrik genutzt werden.

Der methodische Ansatz der KWRA 2021 versucht, die unterschiedlichen Wissensbasen und Disziplinen der beteiligten Behörden zu einer homogenen Betrachtungsweise zu bündeln, indem gemeinsame Grundlagen und ein gemeinsames Verständnis geschaffen wurden. Dieses Vorgehen kann im Wesentlichen als erfolgreich bezeichnet werden, da weitgehend Einigkeit bei der Bewertung erzielt werden konnte. Trotzdem ist die Heterogenität der Grundlagen bei der Interpretation der Ergebnisse zu berücksichtigen.

Die Heterogenität des Behördennetzwerks „Klimawandel und Anpassung“ war mitunter eine Herausforderung, ist aber insbesondere eine große Stärke des DAS-Prozesses. Durch die große Bandbreite von Expertisen wurden sektorenübergreifende Bewertungen erst möglich. In der Verknüpfung dieser Expertisen liegt der Schlüssel zur Lösung der interdisziplinären Herausforderung „Klimawandel“. Die Interdisziplinarität des Behördennetzwerkes zog einen intensiven Austausch und Wissenstransfer nach sich. Es haben sich neue Kooperationen gebildet, die gemeinsame Entwicklungen mit Blick auf die nächste KWRA vorantreiben werden.



Die KWRA 2021 fußt auf intensiven Literaturlauswertungen, Analysen von Daten und Modellergebnissen sowie zahlreichen Experteninterviews. Der Recherchezeitraum für die Analyse der Klimawirkungen verlief bis Anfang 2020. Vereinzelt wurden später erschienene relevante Fachveröffentlichungen in die Analyse aufgenommen, allerdings erfolgte danach keine weitere systematische Literaturrecherche. Die Literaturrecherche zur Anpassungskapazität erfolgte bis Ende September 2020.

Das genaue Verfahren der Methodik wird in Teilbericht 1, „Konzept und Methodik“ ausführlich erläutert.

#### **1.4 Beteiligte an der KWRA 2021**

Die KWRA 2021 wurde von einem wissenschaftlichen Konsortium unter Federführung von adelphi in enger Kooperation mit dem Behördennetzwerk „Klimawandel und Anpassung“ durchgeführt. Das wissenschaftliche Konsortium bestand aus dem Beratungs- und Forschungsinstitut adelphi, dem Planungs-, Beratungs- und Forschungsinstitut Bosch & Partner und der Eurac Research.

Das Behördennetzwerk „Klimawandel und Anpassung“ basiert auf dem „Netzwerk Vulnerabilität“, welches zur Erstellung der VA 2015 gegründet wurde. Es ist das umfangreichste regelmäßige Austauschforum von Bundesoberbehörden in Deutschland.

Das Behördennetzwerk war eng in die Entstehung des KWRA 2021 eingebunden. Der Austausch zwischen dem Behördennetzwerk und dem wissenschaftlichen Konsortium umfasste regelmäßige Netzwerktreffen, gemeinsame Workshops, Interviews sowie bi- und multilaterale Konsultationen. Die Netzwerkpartner haben die gewählte Methodik mitbestimmt, Fachexpertise eingebracht, in einzelnen Fällen unmittelbar textlich mitgewirkt und eine Qualitätssicherung übernommen. Vor allem aber haben sie die normativen Aufgaben, also die Bewertungen der Klimarisiken und der Anpassungskapazität übernommen.

Durch die umfangreiche Einbindung konnte die gesamte vorhandene Expertise der verschiedenen wissenschaftlichen und Umsetzungsbehörden einfließen. Gleichzeitig konnte so auch gewährleistet werden, dass die Ergebnisse mit den Bundesbehörden abgestimmt sind.

Jenseits des Netzwerks wurden noch über 50 externe Expertinnen und Experten insbesondere bei der Untersuchung der einzelnen Klimawirkungen und der Anpassungskapazitäten eingebunden. Sie sind im Anhang des Berichtes aufgeführt.

#### **1.5 Struktur des Berichtes der KWRA 2021**

Der Gesamtbericht besteht aus sechs Teilberichten, einer deutschsprachigen und einer englischsprachigen Zusammenfassung sowie einem Anhang.

Teilbericht 1 fokussiert auf die Konzepte und Grundlagen der KWRA 2021 und umfasst neben einer Einleitung ein Kapitel zur Methodik, in dem das Konzept und Vorgehen der KWRA 2021 detailliert dargestellt werden. Ein drittes Kapitel beleuchtet die Klimaprojektionen, die hydrologischen Projektionen und die Projektionen des Meeresspiegelanstiegs für Deutschland und das damit einhergehende methodische Vorgehen. Ein viertes Kapitel präsentiert die sozioökonomischen Projektionen für Deutschland bis 2045, die neben den Klimaprojektionen in die Bewertungen der Klimarisiken eingegangen sind. In einem fünften Kapitel wird schließlich auf die generische Anpassungskapazität und Beiträge der Querschnittsfelder Raumordnung, Bevölkerungsschutz und Finanzwirtschaft eingegangen.

In den Teilberichten 2 bis 5 sind die Ergebnisse der Klimawirkungsanalyse, der darauf aufbauenden Risikobewertungen sowie der Einschätzungen der Anpassungskapazität für alle Handlungsfelder dargestellt. In Teilbericht 2 stehen die Klimawirkungen und -risiken in den Handlungsfeldern „Boden“, „Biologische Vielfalt“, „Landwirtschaft“ und „Wald- und Forstwirtschaft“ im Fokus, die zum Cluster Land zusammengefasst sind. Der Teilbericht 3 widmet sich dem Cluster Wasser. Dies umfasst die Handlungsfelder „Fischerei“, „Küsten- und Meeresschutz“ sowie „Wasserhaushalt, Wasserwirtschaft“. Teilbericht 4 behandelt das Cluster Infrastruktur, welchem die Handlungsfelder „Bauwesen“, „Energiewirtschaft“ und „Verkehr, Verkehrsinfrastruktur“ zugeordnet sind. In Teilbericht 5 werden sowohl das Cluster Wirtschaft, mit den Handlungsfeldern „Industrie und Gewerbe“ sowie „Tourismuswirtschaft“, als auch das Cluster Gesundheit, was lediglich das Handlungsfeld „Menschliche Gesundheit“ umfasst, näher beleuchtet.

Der vorliegende Teilbericht 6 umfasst eine integrierte Auswertung mit Blick auf alle Teilberichte. Die integrierte Auswertung beinhaltet zunächst in Kapitel 2 eine Gesamtbetrachtung der Klimarisiken ohne Anpassung, in deren Rahmen auch ein Vergleich zu den Ergebnissen der VA 2015 erfolgt. In einem dritten Kapitel werden handlungsfeldübergreifend Aussagen zu klimatischen Einflüssen, zu Sensitivitätsfaktoren, zu Gewissheiten bei der Bewertung der Klimarisiken und zu Querverbindungen zwischen Handlungsfeldern und zwischen Klimawirkungen getroffen. In einem vierten Kapitel werden räumliche Muster untersucht. Dabei wird einerseits eine Typologie von Klimaraumtypen erarbeitet und diskutiert und andererseits eine Auswertung in Form von klimatischen Hotspot-Karten unternommen. Kapitel 5 geht dann im Quervergleich auf die Klimarisiken mit Anpassung ein, sowohl mit Blick auf die Handlungsfelder als auch mit Blick auf die Klimawirkungen. Kapitel 6 widmet sich den Handlungserfordernissen und stellt eine Priorisierung sowie eine Charakterisierung der Handlungserfordernisse vor. Kapitel 7 analysiert verschiedene Systembereiche und geht auf ihre Bezüge und sich ergebende Schlussfolgerungen für die Anpassung näher ein. Kapitel 8 betrachtet überblicksartig weiteren Forschungsbedarf zum einen aus methodischer Perspektive und zum anderen aus inhaltlicher, differenziert für die einzelnen Handlungsfelder. Kapitel 9 umfasst eine Schlussbetrachtung mit Blick auf künftige Klimarisikoanalysen.

Der Anhang der KWRA 2021 enthält unter anderem Daten und Indikatorenkennblätter mit vertiefenden Informationen zur durchgeführten Klimawirkungs- und Risikoanalyse.

Querverweise von dem vorliegenden Teilbericht auf andere Teilberichte der KWRA 2021 sind durch die Nummer des entsprechenden Teilberichts und den Titel des relevanten Kapitels gekennzeichnet.

## 2 Gesamtbetrachtung der Klimarisiken ohne Anpassung

Autoren: Maïke Voß, Walter Kahlenborn, Luise Porst, Mareike Wolf, Sabine Undorf | adelphi, Berlin  
Mareike Wolf, Konstanze Schönthaler | Bosch & Partner, München  
Inke Schauser | Umweltbundesamt, Dessau-Roßlau

### 2.1 Vergleich der Klimarisiken

Im Rahmen der Bewertung der Klimarisiken wurden alle 102 untersuchten Klimawirkungen und 13 Handlungsfelder durch das Behördennetzwerk „Klimawandel und Anpassung“ eingeschätzt, darunter auch einige wenige Chancen des Klimawandels (Tabelle 2). Aufgrund des unterschiedlichen Kenntnisstands zu den einzelnen Klimawirkungen und komplexer Wechselwirkungen und Wirkpfade erfolgte die Bewertung nur in den drei Stufen „gering“, „mittel“ und „hoch“. Bewertet wurden die Klimarisiken für die Zeitscheiben Gegenwart<sup>3</sup>, Mitte des Jahrhunderts (2031 bis 2060) und Ende des Jahrhunderts (2071 bis 2100). Zusätzlich wurde für die Zukunftsbetrachtung ein optimistischer und ein pessimistischer Fall<sup>4</sup> unterschieden (siehe Teilbericht 1, Kapitel „Konzept und Methodik“). Der Vergleich der Klimarisiken soll im Folgenden herausstellen, bei welchen Klimawirkungen, Handlungsfeldern und Clustern Klimarisiken als hoch bewertet wurden. Zudem werden die Klimarisiken in Bezug auf die vier Schutzgüter Mensch, Volkswirtschaft, Umwelt und kulturelles Erbe, die betroffenen Systeme sowie zeitliche Veränderungstendenzen ausgewertet.

---

<sup>3</sup> Unter Gegenwart wird bei der Bewertung der Klimarisiken die jüngere Vergangenheit verstanden, bei der quantitativen Analyse der Bezugszeitraum 1971 bis 2000.

<sup>4</sup> Annahme einer günstigeren beziehungsweise einer ungünstigeren Kombination aus Klimaprojektionen und sozioökonomischen Projektionen.

**Tabelle 1: Klimarisiken der untersuchten Klimawirkungen nach Handlungsfeld**

Vorgelagerte Klimawirkungen, welche direkt von klimatischen Einflüssen ausgelöst werden und nur physische Effekte darstellen, sind mit „\*“ gekennzeichnet. Die Zuordnung der Systembereiche erfolgt in fünf Gruppen: „Natürliche Systeme und Ressourcen (N)“, „Naturnutzende Wirtschaftssysteme (Nn)“, „Infrastrukturen und Gebäude (I&G)“, „Naturferne Wirtschaftssysteme (Nf)“ und „Menschen und soziale Systeme (M)“.

| Handlungsfeld         | Klimawirkung                                                                                  | Gegenwart | Mitte des Jahrhunderts |                      | Ende des Jahrhunderts |                      | Gewissheit der Bewertung |                       | Anpassungsdauer <sup>1</sup> (Jahre) | System |
|-----------------------|-----------------------------------------------------------------------------------------------|-----------|------------------------|----------------------|-----------------------|----------------------|--------------------------|-----------------------|--------------------------------------|--------|
|                       |                                                                                               |           | optimistischer Fall    | pessimistischer Fall | optimistischer Fall   | pessimistischer Fall | Mitte des Jahrhunderts   | Ende des Jahrhunderts |                                      |        |
| Biologische Vielfalt  | Veränderung der Länge der Vegetationsperiode und Phänologie                                   | gering    | mittel                 | hoch                 | mittel                | hoch                 | mittel                   | gering                | keine Reaktion möglich               | N      |
|                       | Ausbreitung invasiver Arten                                                                   | mittel    | mittel                 | hoch                 | hoch                  | hoch                 | mittel                   | gering                | 10-50                                |        |
|                       | Verlust an genetischer Vielfalt                                                               | gering    | gering                 | mittel               | mittel                | hoch                 | mittel                   | sehr gering           | 10-50                                |        |
|                       | Verschiebung von Arealen und Rückgang der Bestände                                            | gering    | mittel                 | mittel               | mittel                | hoch                 | mittel                   | gering                | 10-50                                |        |
|                       | Schäden an Küsten-ökosystemen                                                                 | gering    | mittel                 | mittel               | mittel                | hoch                 | mittel                   | mittel                | 10-50                                |        |
|                       | Schäden an Gebirgsökosystemen                                                                 | gering    | mittel                 | hoch                 | mittel                | hoch                 | mittel                   | mittel                | keine Reaktion möglich               |        |
|                       | Schäden an wasser-gebundenen Habitaten und Feuchtgebieten                                     | mittel    | mittel                 | hoch                 | mittel                | hoch                 | mittel                   | mittel                | 10-50                                |        |
|                       | Schäden an Wäldern                                                                            | mittel    | mittel                 | hoch                 | mittel                | hoch                 | mittel                   | gering                | > 50                                 |        |
|                       | Ökosystemleistungen                                                                           | gering    | gering                 | mittel               | mittel                | hoch                 | sehr gering              | sehr gering           | 10-50                                | Nn     |
| Boden                 | Bodenerosion durch Wasser                                                                     | mittel    | mittel                 | hoch                 | mittel                | hoch                 | mittel                   | gering                | 10-50                                | N      |
|                       | Bodenerosion durch Wind                                                                       | mittel    | mittel                 | hoch                 | mittel                | hoch                 | mittel                   | gering                | 10-50                                |        |
|                       | Rutschungen und Muren                                                                         | gering    | gering                 | mittel               | gering                | mittel               | gering                   | gering                | 10-50                                |        |
|                       | Wassermangel im Boden                                                                         | mittel    | mittel                 | hoch                 | mittel                | hoch                 | gering                   | gering                | 10-50                                |        |
|                       | Sickerwasser*                                                                                 | mittel    | mittel                 | hoch                 | mittel                | hoch                 | gering                   | gering                | keine Reaktion möglich               |        |
|                       | Vernässung*                                                                                   | gering    | gering                 | mittel               | gering                | mittel               | gering                   | gering                | keine Reaktion möglich               |        |
|                       | Bodenbiologie: Mikrobiologische Aktivität/Biodiversität/biologische Funktionalität            | gering    | gering                 | mittel               | gering                | mittel               | sehr gering              | sehr gering           | keine Reaktion möglich               |        |
|                       | Bodenstoffhaushalt: Organische Bodensubstanz, Stickstoff- und Phosphorhaushalt, Stoffausträge | gering    | gering                 | mittel               | gering                | mittel               | gering                   | gering                | < 10                                 |        |
|                       | Bodenfunktionen: Filter- und Pufferfunktionen                                                 | gering    | gering                 | gering               | gering                | mittel               | gering                   | gering                | keine Reaktion möglich               |        |
| Produktionsfunktionen | mittel                                                                                        | mittel    | hoch                   | mittel               | hoch                  | gering               | gering                   | 10-50                 | Nn                                   |        |

<sup>1</sup> Als Anpassungsdauer wird die Zeitdauer für das Wirksamwerden umfassender Maßnahmen zur großräumigen Reduzierung einer Klimawirkung in Deutschland bezeichnet. Die Anpassungsdauer umfasst sowohl die Zeit, die für Vorarbeiten wie die Sicherung der Akzeptanz und Finanzierung, die Planung sowie den Bau und sonstige Umsetzungsschritte wie die Entwicklung von neuen Märkten erforderlich ist als auch die Zeit bis zum Wirksamwerden der Maßnahme vor Ort.

| Handlungsfeld             | Klimawirkung                                                                                  | Gegenwart | Mitte des Jahrhunderts |                      | Ende des Jahrhunderts |                      | Gewissheit der Bewertung |                       | Anpassungsdauer <sup>1</sup> (Jahre) | System |
|---------------------------|-----------------------------------------------------------------------------------------------|-----------|------------------------|----------------------|-----------------------|----------------------|--------------------------|-----------------------|--------------------------------------|--------|
|                           |                                                                                               |           | optimistischer Fall    | pessimistischer Fall | optimistischer Fall   | pessimistischer Fall | Mitte des Jahrhunderts   | Ende des Jahrhunderts |                                      |        |
| Boden                     | Bodenerosion durch Wasser                                                                     | mittel    | mittel                 | hoch                 | mittel                | hoch                 | mittel                   | gering                | 10-50                                | N      |
|                           | Bodenerosion durch Wind                                                                       | mittel    | mittel                 | hoch                 | mittel                | hoch                 | mittel                   | gering                | 10-50                                |        |
|                           | Rutschungen und Muren                                                                         | gering    | gering                 | mittel               | gering                | mittel               | gering                   | gering                | 10-50                                |        |
|                           | Wassermangel im Boden                                                                         | mittel    | mittel                 | hoch                 | mittel                | hoch                 | gering                   | gering                | 10-50                                |        |
|                           | Sickerwasser*                                                                                 | mittel    | mittel                 | hoch                 | mittel                | hoch                 | gering                   | gering                | keine Reaktion möglich               |        |
|                           | Vernässung*                                                                                   | gering    | gering                 | mittel               | gering                | mittel               | gering                   | gering                | keine Reaktion möglich               |        |
|                           | Bodenbiologie: Mikrobiologische Aktivität/Biodiversität/biologische Funktionalität            | gering    | gering                 | mittel               | gering                | mittel               | sehr gering              | sehr gering           | keine Reaktion möglich               |        |
|                           | Bodenstoffhaushalt: Organische Bodensubstanz, Stickstoff- und Phosphorhaushalt, Stoffausträge | gering    | gering                 | mittel               | gering                | mittel               | gering                   | gering                | < 10                                 |        |
|                           | Bodenfunktionen: Filter- und Pufferfunktionen                                                 | gering    | gering                 | gering               | gering                | mittel               | gering                   | gering                | keine Reaktion möglich               |        |
| Produktionsfunktionen     | mittel                                                                                        | mittel    | hoch                   | mittel               | hoch                  | gering               | gering                   | 10-50                 |                                      |        |
| Landwirtschaft            | Hitzestress bei und Leistung von Nutztieren                                                   | gering    | gering                 | mittel               | mittel                | hoch                 | mittel                   | mittel                | < 10                                 | Nn     |
|                           | Abiotischer Stress (Pflanzen)                                                                 | mittel    | mittel                 | hoch                 | mittel                | hoch                 | mittel                   | mittel                | 10-50                                |        |
|                           | Verschiebung von Anbaugebieten                                                                | gering    | gering                 | mittel               | mittel                | mittel               | hoch                     | mittel                | < 10                                 |        |
|                           | Agrophänologische Phasen und Wachstumsperiode                                                 | gering    | gering                 | mittel               | mittel                | mittel               | hoch                     | mittel                | < 10                                 |        |
|                           | Stress durch Schädlinge und Krankheiten (Pflanzen)                                            | gering    | gering                 | mittel               | gering                | mittel               | mittel                   | gering                | < 10                                 |        |
|                           | Ertragsausfälle                                                                               | mittel    | mittel                 | hoch                 | mittel                | hoch                 | gering                   | gering                | 10-50                                |        |
|                           | Qualität der Ernteprodukte                                                                    | gering    | gering                 | mittel               | gering                | mittel               | hoch                     | mittel                | < 10                                 |        |
| Wald- und Forstwirtschaft | Hitze- und Trockenstress                                                                      | mittel    | mittel                 | hoch                 | mittel                | hoch                 | mittel                   | mittel                | > 50                                 |        |
|                           | Stress durch Schädlinge/Krankheiten                                                           | mittel    | mittel                 | hoch                 | mittel                | hoch                 | mittel                   | gering                | > 50                                 |        |
|                           | Schäden durch Windwurf                                                                        | mittel    | mittel                 | mittel               | mittel                | mittel               | mittel                   | gering                | > 50                                 |        |
|                           | Waldbrandrisiko                                                                               | gering    | gering                 | mittel               | mittel                | hoch                 | mittel                   | gering                | > 50                                 |        |
|                           | Nutzfunktion: Holzertrag                                                                      | mittel    | mittel                 | hoch                 | mittel                | hoch                 | mittel                   | gering                | 10-50                                |        |
|                           | Nutzfunktion: Erholung                                                                        | gering    | gering                 | mittel               | gering                | mittel               | mittel                   | gering                | > 50                                 |        |

<sup>1</sup> Als Anpassungsdauer wird die Zeitdauer für das Wirksamwerden umfassender Maßnahmen zur großräumigen Reduzierung einer Klimawirkung in Deutschland bezeichnet. Die Anpassungsdauer umfasst sowohl die Zeit, die für Vorarbeiten wie die Sicherung der Akzeptanz und Finanzierung, die Planung sowie den Bau und sonstige Umsetzungsschritte wie die Entwicklung von neuen Märkten erforderlich ist als auch die Zeit bis zum Wirksamwerden der Maßnahme vor Ort.



| Handlungsfeld                                                                  | Klimawirkung                                                                          | Gegenwart | Mitte des Jahrhunderts |                      | Ende des Jahrhunderts |                      | Gewissheit der Bewertung |                       | Anpassungsdauer <sup>1</sup> (Jahre) | System |
|--------------------------------------------------------------------------------|---------------------------------------------------------------------------------------|-----------|------------------------|----------------------|-----------------------|----------------------|--------------------------|-----------------------|--------------------------------------|--------|
|                                                                                |                                                                                       |           | optimistischer Fall    | pessimistischer Fall | optimistischer Fall   | pessimistischer Fall | Mitte des Jahrhunderts   | Ende des Jahrhunderts |                                      |        |
| Fischerei                                                                      | Entkopplung von Nahrungsbeziehungen in der Ostsee                                     | mittel    | hoch                   | hoch                 | mittel                | hoch                 | hoch                     | sehr gering           | < 10                                 | Nn     |
|                                                                                | Verbreitung wärmeliebender Arten in der Nordsee                                       | gering    | mittel                 | mittel               | mittel                | mittel               | mittel                   | gering                | < 10                                 |        |
|                                                                                | Verbreitung von Fischarten in Fließgewässern                                          | gering    | mittel                 | hoch                 | mittel                | hoch                 | hoch                     | gering                | 10-50                                |        |
|                                                                                | Stress durch Schädlinge/Krankheiten                                                   | gering    | gering                 | mittel               | mittel                | hoch                 | mittel                   | sehr gering           | < 10                                 |        |
|                                                                                | Schäden an Aquakulturen                                                               | gering    | gering                 | mittel               | mittel                | mittel               | mittel                   | gering                | < 10                                 |        |
| Küsten- und Meeresschutz                                                       | Meerestemperatur und Eisbedeckung*                                                    | mittel    | hoch                   | hoch                 | hoch                  | hoch                 | hoch                     | hoch                  | > 50                                 | N      |
|                                                                                | Wasserqualität und Grundwasserver-salzung                                             | mittel    | mittel                 | hoch                 | hoch                  | hoch                 | mittel                   | gering                | > 50                                 |        |
|                                                                                | Meeresspiegel-höhe*                                                                   | mittel    | mittel                 | hoch                 | hoch                  | hoch                 | hoch                     | mittel                | 10-50                                |        |
|                                                                                | Strömungen und Gezeitendynamik*                                                       | mittel    | mittel                 | mittel               | mittel                | mittel               | gering                   | gering                | > 50                                 |        |
|                                                                                | Seegang*                                                                              | gering    | gering                 | mittel               | gering                | mittel               | gering                   | gering                | > 50                                 |        |
|                                                                                | Sturmfluten*                                                                          | mittel    | mittel                 | mittel               | mittel                | mittel               | gering                   | gering                | > 50                                 |        |
|                                                                                | Naturräumliche Veränderungen an Küsten                                                | mittel    | mittel                 | hoch                 | mittel                | hoch                 | mittel                   | gering                | > 50                                 | I&G    |
|                                                                                | Höhere Belastung oder Versagen von Küstenschutzsystemen                               | gering    | gering                 | mittel               | mittel                | mittel               | mittel                   | gering                | > 50                                 |        |
|                                                                                | Beschädigung oder Zerstörung von Siedlung und Infrastruktur an der Küste              | gering    | gering                 | mittel               | mittel                | hoch                 | gering                   | gering                | > 50                                 |        |
| Überlastung der Entwässerungseinrichtungen in überflutungsgefährdeten Gebieten | mittel                                                                                | mittel    | hoch                   | hoch                 | hoch                  | mittel               | mittel                   | 10-50                 |                                      |        |
| Wasserhaushalt, Wasserwirtschaft                                               | Niedrigwasser*                                                                        | mittel    | mittel                 | hoch                 | mittel                | hoch                 | mittel                   | gering                | 10-50                                | N      |
|                                                                                | Hochwasser*                                                                           | mittel    | mittel                 | hoch                 | mittel                | hoch                 | mittel                   | gering                | 10-50                                |        |
|                                                                                | Belastung oder Versagen von Hochwasser-schutzsystemen                                 | mittel    | mittel                 | hoch                 | mittel                | hoch                 | gering                   | gering                | 10-50                                | I&G    |
|                                                                                | Sturzfluten (Versagen von Entwässerungseinrichtungen und Überflutungsschutzsystemen)  | mittel    | mittel                 | hoch                 | hoch                  | hoch                 | gering                   | gering                | 10-50                                | N      |
|                                                                                | Einschränkungen der Funktionsfähigkeit von Kanalnetzen und Vorflutern und Kläranlagen | gering    | gering                 | mittel               | gering                | mittel               | gering                   | gering                | 10-50                                | I&G    |

<sup>1</sup> Als Anpassungsdauer wird die Zeitdauer für das Wirksamwerden umfassender Maßnahmen zur großräumigen Reduzierung einer Klimawirkung in Deutschland bezeichnet. Die Anpassungsdauer umfasst sowohl die Zeit, die für Vorarbeiten wie die Sicherung der Akzeptanz und Finanzierung, die Planung sowie den Bau und sonstige Umsetzungsschritte wie die Entwicklung von neuen Märkten erforderlich ist als auch die Zeit bis zum Wirksamwerden der Maßnahme vor Ort.

| Handlungsfeld                    | Klimawirkung                                                                                     | Gegenwart          | Mitte des Jahrhunderts |                      | Ende des Jahrhunderts |                      | Gewissheit der Bewertung |                       | Anpassungsdauer <sup>1</sup> (Jahre) | System |
|----------------------------------|--------------------------------------------------------------------------------------------------|--------------------|------------------------|----------------------|-----------------------|----------------------|--------------------------|-----------------------|--------------------------------------|--------|
|                                  |                                                                                                  |                    | optimistischer Fall    | pessimistischer Fall | optimistischer Fall   | pessimistischer Fall | Mitte des Jahrhunderts   | Ende des Jahrhunderts |                                      |        |
| Wasserhaushalt, Wasserwirtschaft | Gewässertemperatur und Eisbedeckung und biologische Wasserqualität                               | mittel             | mittel                 | hoch                 | mittel                | hoch                 | mittel                   | mittel                | 10-50                                | N      |
|                                  | Chemische Wasserqualität                                                                         | mittel             | mittel                 | mittel               | mittel                | mittel               | gering                   | gering                | < 10                                 |        |
|                                  | Grundwasserstand und Grundwasserqualität                                                         | gering             | gering                 | hoch                 | gering                | hoch                 | gering                   | gering                | 10-50                                |        |
|                                  | Mangel an Bewässerungswasser                                                                     | gering             | gering                 | mittel               | mittel                | hoch                 | gering                   | gering                | 10-50                                | Nn     |
|                                  | Trinkwasser                                                                                      | gering             | gering                 | mittel               | gering                | mittel               | gering                   | gering                | < 10                                 |        |
|                                  | Produktionswasser                                                                                | gering             | gering                 | mittel               | gering                | mittel               | gering                   | gering                | < 10                                 |        |
| Bauwesen                         | Schäden an Gebäuden aufgrund von Starkregen                                                      | mittel             | mittel                 | mittel               | mittel                | mittel               | mittel                   | gering                | 10-50                                | I&G    |
|                                  | Schäden an Gebäuden aufgrund von Flusshochwasser                                                 | mittel             | mittel                 | hoch                 | mittel                | hoch                 | mittel                   | gering                | 10-50                                |        |
|                                  | Vegetation in Siedlungen                                                                         | gering             | mittel                 | mittel               | mittel                | hoch                 | hoch                     | hoch                  | > 50                                 | Nn     |
|                                  | Stadtklima/Wärmeinseln                                                                           | mittel             | mittel                 | hoch                 | hoch                  | hoch                 | mittel                   | mittel                | 10-50                                | I&G    |
|                                  | Innenraumklima                                                                                   | mittel             | mittel                 | hoch                 | mittel                | hoch                 | mittel                   | mittel                | 10-50                                |        |
|                                  | Zeiten für Bautätigkeit                                                                          | gering             | gering                 | gering               | gering                | gering               | mittel                   | mittel                | < 10                                 | Nf     |
| Energiewirtschaft                | Bedarf an Kühlenergie                                                                            | gering             | gering                 | gering               | mittel                | mittel               | gering                   | gering                | 10-50                                | I&G    |
|                                  | Bedarf an Heizenergie                                                                            | <i>siehe unten</i> |                        |                      |                       |                      |                          |                       |                                      |        |
|                                  | Unterbrechung der regionalen Lieferketten für Energieträger                                      | gering             | gering                 | gering               | gering                | gering               | mittel                   | mittel                | < 10                                 | I&G    |
|                                  | Mangelndes Kühlwasser für thermische Kraftwerke                                                  | gering             | gering                 | gering               | gering                | gering               | mittel                   | mittel                | 10-50                                | Nn     |
|                                  | Ertragsminderung/-zunahme bei Photovoltaikanlagen und bei Windenergieanlagen an Land und auf See | gering             | gering                 | gering               | gering                | gering               | gering                   | gering                | 10-50                                | I&G    |
|                                  | Fehlende Zuverlässigkeit der Energieversorgung                                                   | gering             | gering                 | gering               | gering                | gering               | gering                   | gering                | 10-50                                |        |

<sup>1</sup> Als Anpassungsdauer wird die Zeitdauer für das Wirksamwerden umfassender Maßnahmen zur großräumigen Reduzierung einer Klimawirkung in Deutschland bezeichnet. Die Anpassungsdauer umfasst sowohl die Zeit, die für Vorarbeiten wie die Sicherung der Akzeptanz und Finanzierung, die Planung sowie den Bau und sonstige Umsetzungsschritte wie die Entwicklung von neuen Märkten erforderlich ist als auch die Zeit bis zum Wirksamwerden der Maßnahme vor Ort.

| Handlungsfeld                                                   | Klimawirkung                                                                         | Gegenwart          | Mitte des Jahrhunderts |                      | Ende des Jahrhunderts |                      | Gewissheit der Bewertung |                       | Anpassungsdauer <sup>1</sup> (Jahre) | System |     |
|-----------------------------------------------------------------|--------------------------------------------------------------------------------------|--------------------|------------------------|----------------------|-----------------------|----------------------|--------------------------|-----------------------|--------------------------------------|--------|-----|
|                                                                 |                                                                                      |                    | optimistischer Fall    | pessimistischer Fall | optimistischer Fall   | pessimistischer Fall | Mitte des Jahrhunderts   | Ende des Jahrhunderts |                                      |        |     |
| Verkehr, Verkehrsinfrastruktur                                  | Schiffbarkeit der Binnenschiffahrtsstraßen (Niedrigwasser)                           | mittel             | mittel                 | hoch                 | mittel                | hoch                 | mittel                   | gering                | 10-50                                | Nn     |     |
|                                                                 | Schiffbarkeit der Binnenschiffahrtsstraßen (Hochwasser)                              | gering             | gering                 | gering               | gering                | mittel               | mittel                   | gering                | 10-50                                |        |     |
|                                                                 | Schiffbarkeit der Seeschiffahrtsstraßen                                              | gering             | gering                 | gering               | gering                | mittel               | mittel                   | gering                | 10-50                                |        |     |
|                                                                 | Schäden/Hindernisse bei Straßen und Schienenwegen (Hochwasser)                       | gering             | gering                 | mittel               | gering                | mittel               | mittel                   | mittel                | gering                               | 10-50  | I&G |
|                                                                 | Schäden/Hindernisse bei Straßen und Schienenwegen (gravitative Massenbewegungen)     | gering             | gering                 | mittel               | gering                | mittel               | mittel                   | mittel                | gering                               | 10-50  |     |
|                                                                 | Schäden an Verkehrsleitsystemen, Oberleitungen und Stromversorgungsanlagen           | gering             | gering                 | mittel               | gering                | mittel               | mittel                   | gering                | gering                               | 10-50  |     |
|                                                                 | Schäden an Binnen- und Seeschiffahrtsstraßen, Häfen und maritimen Infrastrukturen    | gering             | gering                 | gering               | gering                | mittel               | mittel                   | mittel                | gering                               | 10-50  |     |
| Industrie und Gewerbe                                           | Beeinträchtigung der Versorgung mit Rohstoffen und Zwischenprodukten (international) | mittel             | mittel                 | hoch                 | mittel                | hoch                 | gering                   | gering                | < 10                                 | Nf     |     |
|                                                                 | Bedingungen auf Absatzmärkten (international)                                        | gering             | gering                 | mittel               | gering                | mittel               | gering                   | gering                | < 10                                 |        |     |
|                                                                 | Wettbewerbsvorteil in innovativen Umwelttechnologien                                 | <i>siehe unten</i> |                        |                      |                       |                      |                          |                       |                                      |        |     |
|                                                                 | Beeinträchtigung des internationalen Warentransports                                 | gering             | gering                 | mittel               | mittel                | mittel               | mittel                   | gering                | 10-50                                | I&G    |     |
|                                                                 | Beeinträchtigung des Warenverkehrs über Wasserstraßen (Inland)                       | mittel             | mittel                 | hoch                 | mittel                | hoch                 | mittel                   | gering                | 10-50                                |        |     |
|                                                                 | Beeinträchtigung des landgestützten Warenverkehrs (Inland)                           | gering             | gering                 | mittel               | gering                | mittel               | gering                   | gering                | < 10                                 |        |     |
| Energieverbrauch und Beeinträchtigung bei der Energieversorgung | gering                                                                               | gering             | gering                 | gering               | gering                | mittel               | mittel                   | < 10                  |                                      |        |     |

<sup>1</sup> Als Anpassungsdauer wird die Zeitdauer für das Wirksamwerden umfassender Maßnahmen zur großräumigen Reduzierung einer Klimawirkung in Deutschland bezeichnet. Die Anpassungsdauer umfasst sowohl die Zeit, die für Vorarbeiten wie die Sicherung der Akzeptanz und Finanzierung, die Planung sowie den Bau und sonstige Umsetzungsschritte wie die Entwicklung von neuen Märkten erforderlich ist als auch die Zeit bis zum Wirksamwerden der Maßnahme vor Ort.



| Handlungsfeld                                                     | Klimawirkung                                                                                          | Gegenwart | Mitte des Jahrhunderts |                      | Ende des Jahrhunderts |                      | Gewissheit der Bewertung |                       | Anpassungsdauer <sup>1</sup> (Jahre) | System |
|-------------------------------------------------------------------|-------------------------------------------------------------------------------------------------------|-----------|------------------------|----------------------|-----------------------|----------------------|--------------------------|-----------------------|--------------------------------------|--------|
|                                                                   |                                                                                                       |           | optimistischer Fall    | pessimistischer Fall | optimistischer Fall   | pessimistischer Fall | Mitte des Jahrhunderts   | Ende des Jahrhunderts |                                      |        |
| Industrie und Gewerbe                                             | Wasserbedarf                                                                                          | mittel    | gering                 | mittel               | gering                | mittel               | gering                   | gering                | < 10                                 | Nn     |
|                                                                   | Freisetzung gefährlicher Stoffe                                                                       | gering    | mittel                 | mittel               | mittel                | mittel               | mittel                   | mittel                | < 10                                 | I&G    |
|                                                                   | Leistungseinbußen von Beschäftigten                                                                   | mittel    | gering                 | mittel               | mittel                | hoch                 | mittel                   | mittel                | < 10                                 | M      |
|                                                                   | Beeinträchtigung von Produktionsprozessen                                                             | gering    | gering                 | gering               | gering                | mittel               | gering                   | gering                | < 10                                 | Nf     |
|                                                                   | Aufwand für die betriebliche Planung                                                                  | gering    | gering                 | gering               | gering                | gering               | gering                   | gering                | < 10                                 |        |
| Tourismuswirtschaft                                               | Einschränkung touristischer Angebote: Auswirkungen fehlender Schneesicherheit auf den Wintertourismus | gering    | mittel                 | mittel               | hoch                  | hoch                 | mittel                   | mittel                | < 10                                 | Nn     |
|                                                                   | Einschränkung touristischer Angebote: Auswirkungen von Hitze auf den Gesundheitstourismus             | gering    | gering                 | mittel               | mittel                | mittel               | gering                   | gering                | < 10                                 |        |
|                                                                   | Schäden an touristischen Infrastrukturen und Betriebsunterbrechungen                                  | gering    | mittel                 | mittel               | mittel                | hoch                 | mittel                   | gering                | < 10                                 | I&G    |
|                                                                   | Verlagerung der Nachfrage                                                                             | gering    | gering                 | mittel               | gering                | mittel               | gering                   | gering                | < 10                                 | Nf     |
|                                                                   | Wirtschaftliche Chancen und Risiken für die Tourismuswirtschaft                                       | mittel    | mittel                 | mittel               | hoch                  | hoch                 | mittel                   | gering                | < 10                                 |        |
|                                                                   | Hitzebelastung                                                                                        | hoch      | mittel                 | hoch                 | mittel                | hoch                 | hoch                     | mittel                | 10-50                                | M      |
| Allergische Reaktionen durch Aeroallergenen pflanzlicher Herkunft | gering                                                                                                | mittel    | hoch                   | mittel               | hoch                  | mittel               | mittel                   | 10-50                 |                                      |        |
| Potenziell schädliche Mikroorganismen und Algen                   | gering                                                                                                | gering    | mittel                 | mittel               | mittel                | hoch                 | mittel                   | < 10                  |                                      |        |
| UV-bedingte Gesundheitsschädigungen (insb. Hautkrebs)             | mittel                                                                                                | mittel    | hoch                   | mittel               | hoch                  | mittel               | sehr gering              | 10-50                 |                                      |        |
| Verbreitung und Abundanzveränderung von möglichen Vektoren        | gering                                                                                                | gering    | mittel                 | mittel               | mittel                | hoch                 | gering                   | < 10                  |                                      |        |
| Atembeschwerden (aufgrund von Luftverunreinigungen)               | mittel                                                                                                | mittel    | mittel                 | mittel               | hoch                  | mittel               | gering                   | < 10                  |                                      |        |
| Verletzungen und Todesfälle infolge von Extremereignissen         | gering                                                                                                | gering    | gering                 | gering               | mittel                | mittel               | gering                   | < 10                  |                                      |        |
| Auswirkungen auf das Gesundheitssystem                            | mittel                                                                                                | mittel    | mittel                 | mittel               | hoch                  | mittel               | sehr gering              | < 10                  |                                      |        |

<sup>1</sup> Als Anpassungsdauer wird die Zeitdauer für das Wirksamwerden umfassender Maßnahmen zur großräumigen Reduzierung einer Klimawirkung in Deutschland bezeichnet. Die Anpassungsdauer umfasst sowohl die Zeit, die für Vorarbeiten wie die Sicherung der Akzeptanz und Finanzierung, die Planung sowie den Bau und sonstige Umsetzungsschritte wie die Entwicklung von neuen Märkten erforderlich ist als auch die Zeit bis zum Wirksamwerden der Maßnahme vor Ort.

**Tabelle 2: Chancen des Klimawandels nach Handlungsfeld<sup>5</sup>**

| Handlungsfeld          | Klimawirkung                                        | Gegenwart | Mitte des Jahrhunderts |                   | Ende des Jahrhunderts |                   | Gewissheit der Bewertung |                       | Anpassungsdauer (Jahre) |
|------------------------|-----------------------------------------------------|-----------|------------------------|-------------------|-----------------------|-------------------|--------------------------|-----------------------|-------------------------|
|                        |                                                     |           | Chancenreicher Fall    | Chancenarmer Fall | Chancenreicher Fall   | Chancenarmer Fall | Mitte des Jahrhunderts   | Ende des Jahrhunderts |                         |
| Energie-wirtschaft     | Bedarf an Heizenergie                               | gering    | gering                 | gering            | mittel                | gering            | gering                   | gering                | < 10                    |
| Industrie und Ge-werbe | Wettbewerbsvorteil in innovativen Umweltechnologien | mittel    | mittel                 | gering            | mittel                | gering            | gering                   | gering                | < 10                    |

### Vergleich der Klimarisiken einzelner Klimawirkungen

Klimawirkungen, die frühzeitig oder im optimistischen Fall hoch bewertet werden, zeigen an, dass es dort bereits ab jetzt oder auch bei einem schwachen Klimawandel zu hohen Klimarisiken kommen kann. Aufgrund der dreistufigen Bewertungsskala kann eine solche Bewertung auch zu einer Unterschätzung von Klimarisiken in späteren Zeitscheiben oder im pessimistischen Fall führen. Daher sind diese Klimawirkungen besonders hervorzuheben:

Hohes Klimarisiko in der Gegenwart

- ▶ Handlungsfeld „Menschliche Gesundheit“: Hitzebelastung

Hohes Klimarisiko im optimistischen Fall zur Mitte des Jahrhunderts

- ▶ Handlungsfeld „Küsten- und Meeresschutz“: Meerestemperatur und Eisbedeckung
- ▶ Handlungsfeld „Fischerei“: Entkopplung von Nahrungsbeziehungen in der Ostsee

Hohes Klimarisiko im pessimistischen Fall zur Mitte des Jahrhunderts und im optimistischen Fall zum Ende des Jahrhunderts

- ▶ Handlungsfeld „Biologische Vielfalt“: Ausbreitung invasiver Arten
- ▶ Handlungsfeld „Wasserhaushalt, Wasserwirtschaft“: Sturzfluten (Versagen von Entwässerungseinrichtungen und Überflutungsschutzsystemen)
- ▶ Handlungsfeld „Küsten- und Meeresschutz“:
  - Wasserqualität und Grundwasserversalzung
  - Meeresspiegelhöhe
  - Überlastung der Entwässerungseinrichtungen in überflutungsgefährdeten Gebieten
- ▶ Handlungsfeld „Bauwesen“: Stadtklima/Wärmeinseln

Dies sind auch die neun Klimawirkungen mit dem höchsten durchschnittlichen Klimarisiko (gerundetes Klimarisiko von „hoch“) über alle Zeitscheiben und beide Fälle (optimistisch und pessimistisch).<sup>6</sup> Das Klimarisiko für die Gegenwart wird bei fast allen (bis auf „Hitzebelastung“) bereits mit mittel bewertet. Das hohe durchschnittliche Klimarisiko könnte unter anderem darin

<sup>5</sup> Für Klimawirkungen, bei denen der Klimawandel zu einer Verbesserung der Situation führt, wird eine separate Terminologie genutzt. Hier geht es um die Chancen des Klimawandels. Dementsprechend wird die Bedeutung dieser Klimawirkungen in den Zeiträumen Mitte des Jahrhunderts und Ende des Jahrhunderts nicht für einen optimistischen und einen pessimistischen Fall bewertet, sondern für einen chancenreichen und einen chancenarmen Fall.

<sup>6</sup> Für die Ermittlung durchschnittlicher Klimarisiken wurden der Wertebereich des Klimarisikos numerisch dargestellt (1=gering, 2=mittel, 3=hoch). Die ermittelten Werte stellen daher eine künstliche Spezifizierung der Klimarisiken dar.

begründet sein, dass auf diese Klimarisiken größtenteils solche klimatischen Einflüsse einwirken, für welche auch im optimistischen Fall eine deutliche Zunahme erwartet wird. Weitere Gründe könnten sein, dass diese Klimawirkungen besonders sensible Systeme betreffen und solche, die durch andere Einflussfaktoren, wie eine intensive menschliche Nutzung, bereits vorbelastet sind und von anderen tiefgreifenden Veränderungsprozessen, wie Urbanisierung und Globalisierung, beeinflusst werden. Der Klimawandel könnte daher auf diese sensiblen oder vorbelasteten Systeme eine stärkere Wirkung haben.

Weiterhin fällt auf, dass die meisten der genannten hohen Klimarisiken natürliche Systeme und naturnutzende Systeme treffen, die von einem graduellen Temperaturanstieg oder einem dadurch verursachten Meeresspiegelanstieg beeinflusst werden. Wichtige klimatische Extreme für hohe Klimarisiken scheinen sowohl Hitze zu sein, mit Auswirkungen insbesondere für das Stadtklima und die menschliche Gesundheit, sowie Starkregen und dadurch verursachte Sturzfluten.

Herausragend ist die Klimawirkung „Hitzebelastung“ aus dem Handlungsfeld „Menschliche Gesundheit“, die als einzige bereits in der Gegenwart als hohes Klimarisiko eingestuft wird. Dies entspricht der Bewertung in der VA 2015, da Hitzewellen bereits seit 2003 immer wieder zu hohen Mortalitätsraten in Deutschland und Europa führen.

Auffällig ist besonders, dass fast die Hälfte der oben aufgeführten Klimawirkungen dem Handlungsfeld „Küsten- und Meeresschutz“ zuzuordnen sind. In diesem Handlungsfeld werden für vergleichsweise viele Klimawirkungen hohe Klimarisiken zum Ende des Jahrhunderts für den optimistischen wie für den pessimistischen Fall erwartet. Hier wird deutlich, dass die betrachteten Systeme selbst im optimistischen Fall zum Ende des Jahrhunderts stark beeinträchtigt werden. Bei den Klimawirkungen „Meerestemperatur und Eisbedeckung“ und „Meeresspiegelhöhe“ handelt es sich um solche vorgelagerten Wirkungen, welche direkt von klimatischen Einflüssen ausgelöst werden und selbst nur physische Effekte darstellen. Diese vorgelagerten Klimawirkungen weisen somit Ähnlichkeiten zu den klimatischen Einflüssen<sup>7</sup> auf (siehe auch Teilbericht 1, „Konzept und Methodik“).<sup>8</sup> Ihre nachgelagerten Wirkungen auf andere Systeme werden im Kapitel 3.4 ausgewertet.

Zwei weitere Klimawirkungen zeigen zum Ende des Jahrhunderts hohe Klimarisiken im optimistischen sowie im pessimistischen Fall und weisen somit auf eine langfristig hohe Wahrscheinlichkeit für bedeutsame klimatische Auswirkungen hin. Hier sind vor allem klimatisch abhängige und naturnutzende Wirtschaftsformen betroffen:

- ▶ Handlungsfeld „Tourismuswirtschaft“:
  - Einschränkung touristischer Angebote: Auswirkungen fehlender Schneesicherheit auf den Wintertourismus
  - Wirtschaftliche Chancen und Risiken für die Tourismuswirtschaft

Unter ausschließlicher Betrachtung des pessimistischen Falls weisen zur Mitte des Jahrhunderts 37 Klimawirkungen, das heißt mehr als ein Drittel aller Klimawirkungen, ein hohes Klimarisiko auf. Zum Ende des Jahrhunderts sind es sogar 53, also mehr als die Hälfte aller betrachteten Klimawirkungen. Besonders viele dieser Klimawirkungen mit hohem Klimarisiko gehören zu den

---

<sup>7</sup> Der IPCC spricht in seinem 5. Sachstandsbericht von „Gefährdung“ (englisch: *hazard*) und bezeichnet damit klimatische oder klimabedingte physikalische Ereignisse oder Trends beziehungsweise deren physische Folgen (Agard et al. 2014).

<sup>8</sup> Im Rahmen der Untersuchung der Anpassungskapazität wurde zudem eine weitere Unterscheidung zwischen vorgelagerten Klimawirkungen mit und ohne Anpassungspotenzial vorgenommen. Weitere Informationen dazu finden sich im Teilbericht 1, „Konzept und Methodik“.

Handlungsfeldern „Biologische Vielfalt“, „Wasserhaushalt, Wasserwirtschaft“ und „Küsten- und Meeresschutz“ und betreffen vor allem natürliche und naturnutzende Systeme.

Geringe Klimarisiken finden sich dagegen bei folgenden Klimawirkungen (geringstes durchschnittliches Klimarisiko über alle Zeitscheiben)<sup>9</sup>:

- ▶ Handlungsfeld „Bauwesen“: Zeiten für Bautätigkeit
- ▶ Handlungsfeld „Energiewirtschaft“:
  - Unterbrechung der regionalen Lieferketten für Energieträger
  - Mangelndes Kühlwasser für thermische Kraftwerke
  - Ertragsminderung/-zunahme bei Photovoltaikanlagen und bei Windenergieanlagen an Land und auf See
  - Fehlende Zuverlässigkeit der Energieversorgung
- ▶ Handlungsfeld „Industrie und Gewerbe“:
  - Energieverbrauch und Beeinträchtigung bei der Energieversorgung
  - Aufwand für die betriebliche Planung

Diese Klimawirkungen mit den geringsten Klimarisiken beziehen sich ausschließlich auf Infrastrukturen und Gebäude sowie naturferne Wirtschaftssysteme. Der größte Teil dieser Klimawirkungen lässt sich dem Handlungsfeld „Energiewirtschaft“ zuordnen. Dies könnte darin begründet liegen, dass sich insbesondere in diesem Handlungsfeld zukünftig weitgehende Änderungen vor allem durch die Energiewende ergeben werden, welche auch einige Klimarisiken im Handlungsfeld reduzieren können (unter anderem „Unterbrechung der regionalen Lieferketten für Energieträger“ und „Mangelndes Kühlwasser für thermische Kraftwerke“). Besonders beim Bauwesen wird eine große Heterogenität der Bewertungen innerhalb des Handlungsfelds deutlich, da bei einer Klimawirkung des Handlungsfelds jeweils eine der höchsten und der geringsten Klimarisiken gesehen wird. Dies verdeutlicht, dass sich die Auswirkungen des Klimawandels auch innerhalb eines Handlungsfeldes erheblich unterscheiden können, abhängig von den betrachteten Teilsystemen sowie den klimatischen Einflüssen und jeweiligen Sensitivitäten.

### **Vergleich der Klimarisiken der Handlungsfelder**

Anhand der Bewertungen der Klimarisiken auf Ebene der Handlungsfelder, welche separat zu den Klimarisiken auf Ebene der Klimawirkungen ausgewiesen wurden, lassen sich besonders betroffene Handlungsfelder ableiten (Tabelle 3).

---

<sup>9</sup> Das geringste durchschnittliche Klimarisiko meint hierbei alle Klimawirkungen, die ein durchschnittliches Klimarisiko von „gering“ (=1) ohne Rundung aufweisen.

In der Gegenwart sowie im optimistischen Fall zur Mitte des Jahrhunderts wird kein Handlungsfeld mit einem hohen Klimarisiko bewertet. Mittlere Klimarisiken finden sich bei über der Hälfte aller Handlungsfelder. Bei folgenden Handlungsfeldern liegt ein mittleres Klimarisiko sowohl zur Gegenwart, wie auch zur Mitte des Jahrhunderts im optimistischen Fall vor:

- ▶ Wald- und Forstwirtschaft
- ▶ Küsten- und Meeresschutz
- ▶ Wasserhaushalt, Wasserwirtschaft
- ▶ Bauwesen
- ▶ Menschliche Gesundheit

Im pessimistischen Fall zur Mitte des Jahrhunderts wird ein deutlicher Anstieg der Klimarisiken in diesen Handlungsfeldern erwartet. Ein hohes Klimarisiko wird für alle oben genannten Handlungsfelder, bis auf das Handlungsfeld „Bauwesen“, sowie zusätzlich in der Landwirtschaft und der Fischerei eingeschätzt. Die Handlungsfelder „Bauwesen“, „Biologische Vielfalt“ und „Boden“ können von einem mittel-hohen Klimarisiko betroffen sein. Darunter finden sich wieder viele Bezüge zu natürlichen und naturnutzenden Systemen, die damit schon frühzeitig (auch auf Ebene der Handlungsfelder) hohen Klimarisiken ausgesetzt sind.

Der Anstieg der Bewertungen der Klimarisiken im pessimistischen Fall setzt sich auch zum Ende des Jahrhunderts fort. Hier können nahezu alle Handlungsfelder stärker von den Auswirkungen des Klimawandels betroffen sein. So finden sich in fast allen Handlungsfeldern mittel-hohe oder hohe Klimarisiken. Im Handlungsfeld „Küsten- und Meeresschutz“ werden sogar im optimistischen Fall zum Ende des Jahrhunderts hohe Klimarisiken und im Handlungsfeld „Menschliche Gesundheit“ mittel-hohe Klimarisiken gesehen.

Geringe Klimarisiken (betrachtet über alle Zeitscheiben und Fälle) finden sich vor allem in den Handlungsfeldern „Energiewirtschaft“ und „Industrie und Gewerbe“. Dies verdeutlicht, dass die Klimarisiken bei Infrastrukturen und Gebäuden sowie naturfernen Wirtschaftssystemen als relativ gering eingeschätzt werden. Zusätzlich können zur Mitte des Jahrhunderts im optimistischen Fall die Handlungsfelder „Tourismuswirtschaft“ und „Verkehr, Verkehrsinfrastruktur“ geringe Klimarisiken aufweisen. Im letztgenannten Handlungsfeld kann sich auch zum Ende des Jahrhunderts das Klimarisiko nur leicht auf „gering-mittel“ erhöhen.

Bei näherer Betrachtung der Anteile hoher Klimarisiken an den je Handlungsfeld insgesamt bearbeiteten Klimawirkungen, lassen sich weitere Auffälligkeiten feststellen. So können zur Mitte des Jahrhunderts im pessimistischen Fall in den Handlungsfeldern „Biologische Vielfalt“, „Wasserhaushalt, Wasserwirtschaft“, „Küsten- und Meeresschutz“, „Wald- und Forstwirtschaft“ und „Bauwesen“ mindestens die Hälfte der jeweils untersuchten Klimawirkungen von hohen Klimarisiken betroffen sein.

Für das Ende des Jahrhunderts wurden im Handlungsfeld „Biologische Vielfalt“ für den pessimistischen Fall sogar alle bearbeiteten Klimawirkungen hoch bewertet. In den Handlungsfeldern „Wald- und Forstwirtschaft“, „Wasserhaushalt, Wasserwirtschaft“, „Bauwesen“ und „Menschliche Gesundheit“ können fast zwei Drittel aller in den jeweiligen Handlungsfeldern untersuchten Klimawirkungen hohe Klimarisiken zum Ende des Jahrhunderts im pessimistischen Fall aufweisen. Selbst im optimistischen Fall (Zeitscheibe Ende des Jahrhunderts) finden sich im Vergleich zur jeweils betrachteten Anzahl an Klimawirkungen pro Handlungsfeld viele hohe Klimarisiken vor allem in den Handlungsfeldern „Küsten- und Meeresschutz“ und „Tourismuswirtschaft“. Dies deutet darauf hin, dass die betroffenen Systeme auch bei einem schwachen Klimawandel bis zum Ende des Jahrhunderts stark beeinträchtigt werden können, weil die Systeme sehr sensitiv



sind oder der Unterschied bei diesen Klimawirkungen zwischen einem starken und schwachen Klimawandel gering ist. Auch methodische Gründe können hier vorliegen, da das Klimarisiko bei einem starken Klimawandel nicht höher als die Stufe „hoch“ eingeschätzt werden kann.

Als zusätzliche Betrachtungsebene wurde die Anzahl der bearbeiteten Klimawirkungen pro Handlungsfeld mit den ermittelten Klimarisiken abgeglichen. In den Handlungsfeldern „Wasserhaushalt, Wasserwirtschaft“ und „Küsten- und Meeresschutz“ wurden mit elf beziehungsweise zehn Klimawirkungen neben den Handlungsfeldern „Industrie und Gewerbe“ (zwölf untersuchte Klimawirkungen) und „Boden“ (zehn untersuchte Klimawirkungen) die meisten Klimawirkungen pro Handlungsfeld im Rahmen der KWRA 2021 bearbeitet. Die beiden erst genannten Handlungsfelder werden zudem, wie oben herausgestellt, mit vielen hohen Klimarisiken bewertet. Im Handlungsfeld „Industrie und Gewerbe“ wurden auch vergleichsweise viele Klimawirkungen ausgewählt, hier werden jedoch eher geringe Klimarisiken gesehen.

**Tabelle 3: Übersicht der Klimarisiken ohne Anpassung auf Ebene der Handlungsfelder**

|                                         | Gegenwart     | Mitte des Jahrhunderts, optimistischer Fall | Mitte des Jahrhunderts, pessimistischer Fall | Ende des Jahrhunderts, optimistischer Fall | Ende des Jahrhunderts, pessimistischer Fall |
|-----------------------------------------|---------------|---------------------------------------------|----------------------------------------------|--------------------------------------------|---------------------------------------------|
| <b>Boden</b>                            | gering-mittel | gering-mittel                               | mittel-hoch                                  | gering-mittel                              | mittel-hoch                                 |
| <b>Biologische Vielfalt</b>             | gering        | mittel                                      | mittel-hoch                                  | mittel                                     | hoch                                        |
| <b>Landwirtschaft</b>                   | mittel        | mittel                                      | hoch                                         | mittel                                     | hoch                                        |
| <b>Wald- und Forstwirtschaft</b>        | mittel        | mittel                                      | hoch                                         | mittel                                     | hoch                                        |
| <b>Fischerei</b>                        | gering-mittel | mittel                                      | hoch                                         | mittel                                     | hoch                                        |
| <b>Küsten- und Meeresschutz</b>         | mittel        | mittel                                      | hoch                                         | hoch                                       | hoch                                        |
| <b>Wasserwirtschaft, Wasserhaushalt</b> | mittel        | mittel                                      | hoch                                         | mittel                                     | hoch                                        |
| <b>Verkehr, Verkehrsinfrastruktur</b>   | gering-mittel | gering                                      | mittel                                       | gering-mittel                              | mittel-hoch                                 |
| <b>Bauwesen</b>                         | mittel        | mittel                                      | mittel-hoch                                  | mittel                                     | hoch                                        |
| <b>Energiewirtschaft</b>                | gering        | gering                                      | gering                                       | gering                                     | gering                                      |
| <b>Tourismuswirtschaft</b>              | gering        | gering                                      | mittel                                       | mittel                                     | hoch                                        |
| <b>Industrie und Gewerbe</b>            | mittel        | gering                                      | mittel                                       | gering                                     | mittel                                      |
| <b>Menschliche Gesundheit</b>           | mittel        | mittel                                      | hoch                                         | mittel-hoch                                | hoch                                        |

### Vergleich der Klimarisiken der Cluster

Die bisher dargestellten Ergebnisse machen deutlich, dass auch auf Ebene der fünf Cluster<sup>10</sup> Land, Wasser, Infrastruktur, Wirtschaft und Gesundheit relativ viele hohe Klimarisiken vor allem in den Clustern Land, Wasser und Gesundheit zu erwarten sind.

<sup>10</sup> Die Bildung der fünf Cluster Land, Wasser, Infrastruktur, Wirtschaft und Gesundheit war ein Ergebnis der Vulnerabilitätsanalyse 2015 (Buth et al. 2015). Das Cluster Land umfasst die Handlungsfelder „Biologische Vielfalt“, „Boden“, „Landwirtschaft“ und „Wald-

In den Clustern Wasser und Gesundheit finden sich die höchsten durchschnittlichen Klimarisiken (gemittelter Durchschnitt der Bewertungsergebnisse aller einzelnen Klimarisiken pro Cluster) in der Gegenwart sowie in den optimistischen Fällen zur Mitte und zum Ende des Jahrhunderts. Die Klimarisiken in diesen Clustern werden somit schon bis zur Mitte des Jahrhunderts selbst bei einem schwachen Klimawandel als stark eingeschätzt. Das Cluster Land zeigt im pessimistischen Fall zur Mitte des Jahrhunderts die zweithöchsten (nach dem Cluster Wasser) und zum Ende des Jahrhunderts die höchsten durchschnittlichen Klimarisiken aller Cluster auf, gefolgt von den Clustern Gesundheit und Wasser. Beim Cluster Land wird also insbesondere im Falle eines starken Klimawandels eine starke Veränderung des Klimarisikos über die Zeitscheiben hinweg erwartet.

Auffällig ist zudem, dass bereits für die Mitte des Jahrhunderts im pessimistischen Fall in den beiden Clustern Land und Wasser nur noch eine Klimawirkung der insgesamt 58 Klimawirkungen in beiden Clustern mit gering bewertet wurde.

Vergleichsweise geringe durchschnittliche Klimarisiken werden über alle Zeitscheiben und Fälle in den Clustern Infrastruktur und Wirtschaft eingeschätzt.

### **Vergleich der Klimarisiken bezogen auf Schutzgüter und betroffene Systembereiche**

Die ermittelten Klimarisiken wurden auch in Bezug auf die vier Schutzgüter Mensch, Volkswirtschaft, Umwelt und kulturelles Erbe ausgewertet. Die Schutzgüter wurden in Anlehnung an die Risikoanalyse im Bevölkerungsschutz (BBK 2015) und das Gesetz über die Umweltverträglichkeitsprüfung (UVP) ausgewählt (siehe Teilbericht 1, Kapitel, „Konzept und Methodik“). Der Begriff Schutzgut meint all jenes, was es vor Schäden zu bewahren gilt. Das Schutzgut Mensch umfasst so unter anderem Klimawirkungen mit Bezug zum menschlichen Wohlergehen und der Unversehrtheit von Menschenleben. Unter dem Schutzgut Volkswirtschaft werden Auswirkungen auf die private Wirtschaft, private Haushalte und auf den öffentlichen Haushalt sowie wichtige Infrastrukturen verstanden. Das Schutzgut Umwelt beinhaltet unter anderem geschützte Gebiete, sensible Ökosysteme und Arten, landwirtschaftliche Nutzflächen, Waldflächen und Nutzvieh. Das Schutzgut kulturelles Erbe bezieht sich auf schützenswerte Kulturgüter und immaterielle Güter. Im Rahmen der Bewertung der Klimarisiken wurde ermittelt, welche Klimawirkungen sich welchen Schutzgüter zuordnen lassen (Doppelnennungen waren möglich). Dem Schutzgut Mensch wurden 74 Klimawirkungen zugeordnet, dem Schutzgut Volkswirtschaft 93, dem Schutzgut Umwelt 46 und dem Schutzgut kulturelles Erbe 23 Klimawirkungen.

In der Auswertung der Schutzgüter wird deutlich, dass vergleichsweise viele Klimawirkungen des Schutzgutes Umwelt im pessimistischen Fall in den Zeiträumen Mitte und Ende des Jahrhunderts mit hoch bewertet wurden. Dies zeigt die hohe Betroffenheit aquatischer und landgebundener Ökosysteme und betrifft beispielsweise Klimawirkungen in den Bereichen Bodenerosion, Verlust an genetischer Vielfalt oder Rückgang der Bestände an Arten, Schäden an Ökosystemen wie Wälder oder naturräumlichen Veränderungen. Auch die Klimawirkungen, die dem Schutzgut kulturelles Erbe zugeordnet wurden, können insbesondere für das Ende des Jahrhunderts überdurchschnittlich oft ein hohes Klimarisiko aufweisen. Hierbei handelt es sich größtenteils um Klimarisiken mit Bezug zu Kulturlandschaften, Landschaftsgärten sowie bauliche Kulturgüter.

Klimawirkungen des Schutzgutes Mensch werden dagegen im pessimistischen Fall bis zum Ende des Jahrhunderts mit unterdurchschnittliche Klimarisiken bewertet. Dabei handelt es sich vor allem um Risiken in den Bereichen Verkehr, Energie und Industrie. Höhere Klimarisiken liegen

---

und Forstwirtschaft“, das Cluster Wasser die Handlungsfelder „Fischerei“, „Küsten- und Meeresschutz“ und „Wasserhaushalt, Wasserwirtschaft“, das Cluster Infrastruktur die Handlungsfelder „Bauwesen“, „Energiewirtschaft“ und „Verkehr und Verkehrsinfrastruktur“, das Cluster Wirtschaft die Handlungsfelder „Industrie und Gewerbe“ und „Tourismuswirtschaft“ und das Cluster „Gesundheit“ das Handlungsfeld „Menschliche Gesundheit“.



in Bezug auf das Schutzgut Mensch nur im Bereich der menschlichen Gesundheit vor. Die Anzahl der dem Schutzgut Volkswirtschaft zugeordneten Klimawirkungen entspricht mit 93 fast der Gesamtanzahl aller Klimawirkungen (102).

Um eine Spezifizierung der betroffenen Systeme zu ermöglichen, wurden in einer weiteren Analyse die 100 Klimawirkungen, bei denen die Klimawirkungen zu einer Verschlechterung der Situation führen, in fünf Systembereiche eingeteilt: „Natürliche Systeme und Ressourcen“, „Naturnutzende Wirtschaftssysteme“, „Infrastrukturen und Gebäude“, „Naturferne Wirtschaftssysteme“ und „Menschen und soziale Systeme“. Zu den natürlichen Systemen und Ressourcen gehören 30 Klimawirkungen aus den Handlungsfeldern „Boden“, „Biologische Vielfalt“, „Wasserhaushalt, Wasserwirtschaft“ und „Küsten- und Meeresschutz“, welche direkt vom Klimawandel betroffen sind. 31 Klimawirkungen betreffen Systeme, die den naturnutzenden Wirtschaftssystemen zugeordnet sind, vorwiegend im Bereich der Land- und Forstwirtschaft, der Fischerei und der Wasserwirtschaft. 23 Klimawirkungen haben einen direkten Bezug zu Infrastrukturen und Gebäuden. Naturferne Wirtschaftssysteme sind von sieben Klimawirkungen eher indirekt betroffen, größtenteils aus den Handlungsfeldern „Tourismuswirtschaft“ und „Industrie und Gewerbe“. Neun Klimawirkungen, hauptsächlich aus dem Bereich der menschlichen Gesundheit, finden sich im Systembereich „Menschen und soziale Systeme“.

Bei Betrachtung der Klimarisiken bezogen auf die fünf Systeme wird deutlich, dass bei den natürlichen Systemen und Ressourcen bei ungefähr 60 Prozent der Klimawirkungen bereits zur Mitte des Jahrhunderts im pessimistischen Fall hohe Klimarisiken erwartet werden (Abbildung 1). Zum Ende des Jahrhunderts kann das dann auf 70 Prozent der Klimawirkungen steigen. Die Klimawirkungen des Systembereichs „Menschen und soziale Systeme“ können im pessimistischen Fall zu einem Drittel zur Mitte des Jahrhunderts und zu zwei Dritteln zum Ende des Jahrhunderts im pessimistischen Fall mit hohen Klimarisiken verbunden sein. Im Bereich der naturnutzenden Wirtschaftssysteme sind im pessimistischen Fall fast 30 Prozent der betrachteten Klimawirkungen zur Mitte des Jahrhunderts und die Hälfte zum Ende des Jahrhunderts mit hohen Klimarisiken bewertet worden. Im Systembereich „Infrastrukturen und Gebäude“ können zur Mitte des Jahrhunderts ungefähr ein Viertel und zum Ende des Jahrhunderts im pessimistischen Fall ein Drittel der Klimawirkungen hohen Klimarisiken ausgesetzt sein. Bei den naturfernen Wirtschaftssystemen findet sich zur Mitte des Jahrhunderts im pessimistischen Fall nur eine Klimawirkung mit einem hohen Klimarisiko. Die beiden zuletzt genannten Systeme, welche vor allem künstliche (beziehungsweise menschengemachte) Systembereiche darstellen, weisen also vergleichsweise geringe Bewertungen der Klimarisiken auf und bekräftigen die Erkenntnisse der Auswertung der Klimarisiken auf Ebene der Klimawirkungen und Handlungsfelder.

**Abbildung 1: Prozentualer Anteil der als hoch bewerteten Klimarisiken für die Gegenwart und den pessimistischen Fall zur Mitte und zum Ende des Jahrhunderts bezogen auf die fünf Systeme**

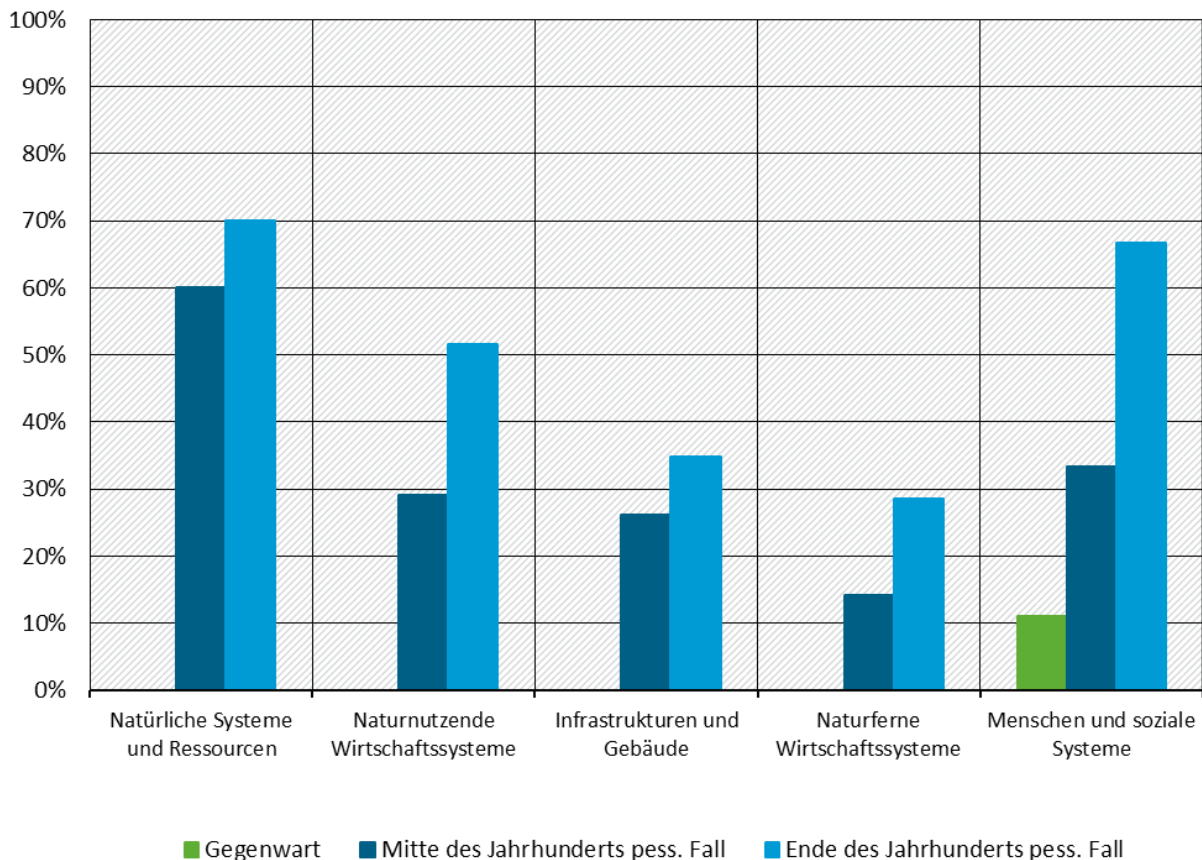

Quelle: eigene Darstellung, adelphi

### Analyse von (zeitlichen) Veränderungstendenzen

Eine etwas eingehendere Betrachtung der Entwicklung der Klimarisiken ermöglicht es, weitere Schlussfolgerungen für die Handlungsfelder zu ziehen. Um diesbezüglich eine bessere Analysegrundlage zu erhalten, wurden die Klimarisiken der Klimawirkungen in den einzelnen Handlungsfeldern für alle drei Zeitscheiben und für beide Fälle (optimistisch und pessimistisch) jeweils getrennt gemittelt. Die zeitlichen Veränderungen dieser Mittelwerte von der Gegenwart über die Mitte bis zum Ende des Jahrhunderts sind nachfolgend vergleichend dargestellt. Drei auffallende Unterschiede zwischen den Handlungsfeldern bezüglich besonders relevanter Aspekte werden im Weiteren diskutiert.

Ein erster Unterschied zwischen den Handlungsfeldern besteht darin, wie sehr sich die Änderung ihrer Klimarisiken zwischen dem optimistischen und dem pessimistischen Fall unterscheidet. Diese Divergenz ist für die Handlungsfelder „Wasserhaushalt, Wasserwirtschaft“, „Boden“ sowie „Landwirtschaft“ am größten.<sup>11</sup> Abbildung 2 stellt die Entwicklungen in den drei Handlungsfeldern und den Durchschnitt über alle 102 Klimawirkungen dar. In den genannten drei Handlungsfeldern ist der Abstand der Linien im pessimistischen und im optimistischen Fall deutlich größer. Die Differenz zwischen dem pessimistischen und optimistischen Fall deutet darauf hin, dass die zukünftige Risikoänderung mit höherer Unsicherheit behaftet ist, weil sie stark

<sup>11</sup> Gemessen am Mittelwert der jeweiligen Differenzen zur Mitte des Jahrhunderts und zu Ende des Jahrhunderts; eine Betrachtung nur der Differenzen zu Mitte des Jahrhunderts ergibt dieselben drei Handlungsfelder.

von der weiteren Entwicklung des Klimawandels abhängig ist. Dies sollte bei der Anpassungsplanung berücksichtigt werden.

Eine Ursache für die größeren Divergenzen in diesen drei Handlungsfeldern kann die hohe Bedeutung der niederschlagsbezogenen klimatischen Einflüsse sein. Wie in Teilbericht 1, Kapitel „Klimaprojektionen“ dargestellt, weisen die Niederschlagsprojektionen für Mitte und Ende des Jahrhunderts teilweise einen Vorzeichenwechsel auf. Damit ist ersichtlich, warum hier relativ hohe Klimarisiken im pessimistischen (niederschlagsarmen) und relativ geringe Klimarisiken im optimistischen (niederschlagsreichen) Fall vorliegen.

**Abbildung 2: Handlungsfelder mit großen Divergenzen bei der Entwicklung der Klimarisiken**

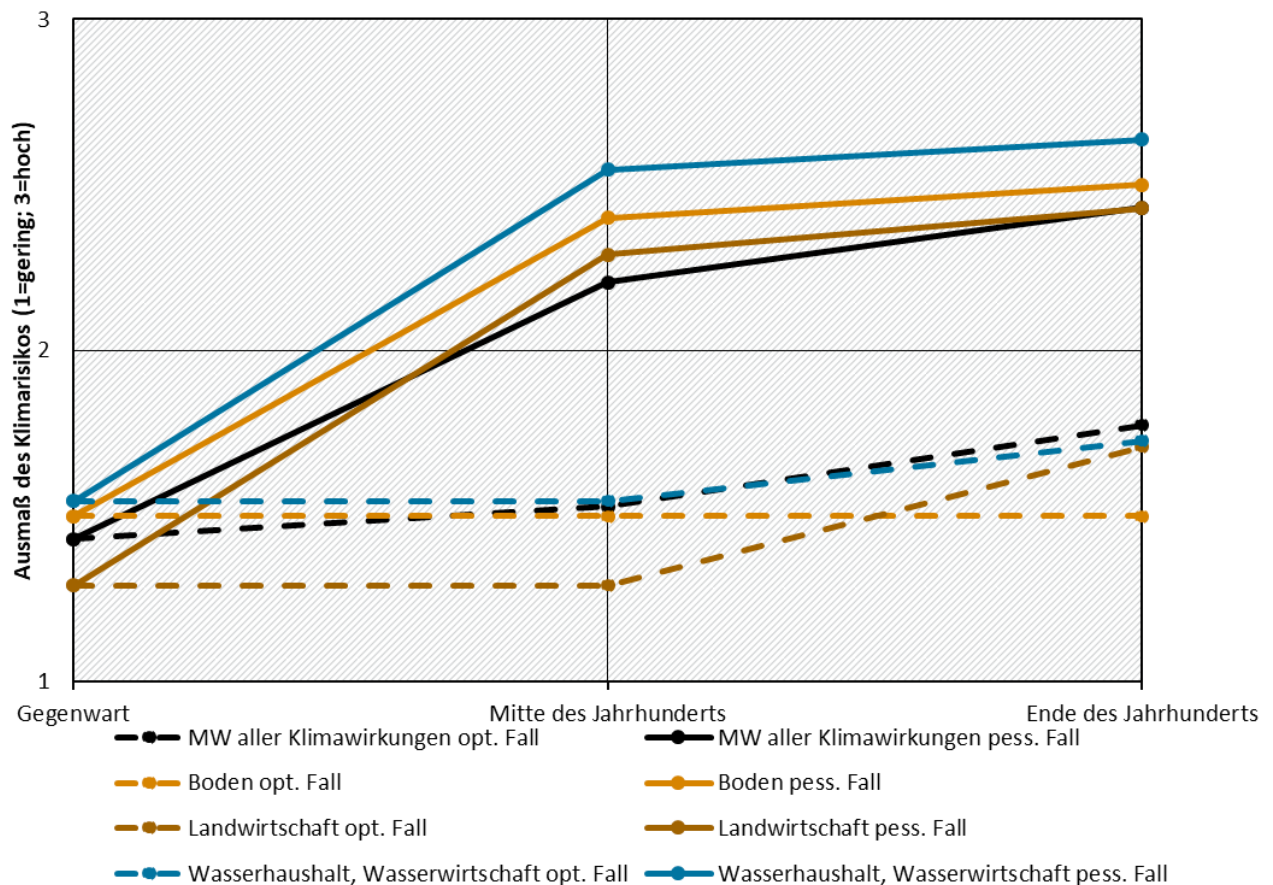

Hinweis: „MW“ steht in der Legende für Mittelwert, „opt.“ für optimistisch und „pess.“ für pessimistisch.

Quelle: eigene Darstellung, adelphi

Bei den Handlungsfeldern „Biologische Vielfalt“, „Fischerei“ und „Tourismuswirtschaft“ ist insgesamt eine sehr dynamische Entwicklung zu erkennen. Hier werden die gegenwärtigen Klimarisiken im Durchschnitt als gering bewertet, diese Risiken steigen aber in den Projektionen über die Mitte bis hin zum Ende des Jahrhunderts stark an (Abbildung 3).<sup>12</sup> Für diese Handlungsfelder gilt, dass hier eine besondere Aufmerksamkeit notwendig ist. Die gegenwärtig niedrige Bewer-

<sup>12</sup> Diese drei Handlungsfelder kristallisieren sich sowohl heraus, wenn nur die Gesamtänderung von der Gegenwart bis zum Ende des Jahrhunderts im pessimistischen und/oder im optimistischen Fall betrachtet wird oder nur Änderungen von der Gegenwart bis zur Mitte des Jahrhunderts (im pessimistischen und/oder optimistischen Fall) oder nur Änderungen von der Mitte des Jahrhunderts bis zum Ende des Jahrhunderts im pessimistischen Fall betrachtet werden.



tung der Klimarisiken kann sonst darüber hinwegtäuschen, dass eine sehr dynamische Verschlechterung erwartet wird. Entsprechend besteht hier das Risiko, die Anpassungsnotwendigkeit zu unterschätzen.

**Abbildung 3: Handlungsfelder mit erwartetem starkem Anstieg der Klimarisiken**

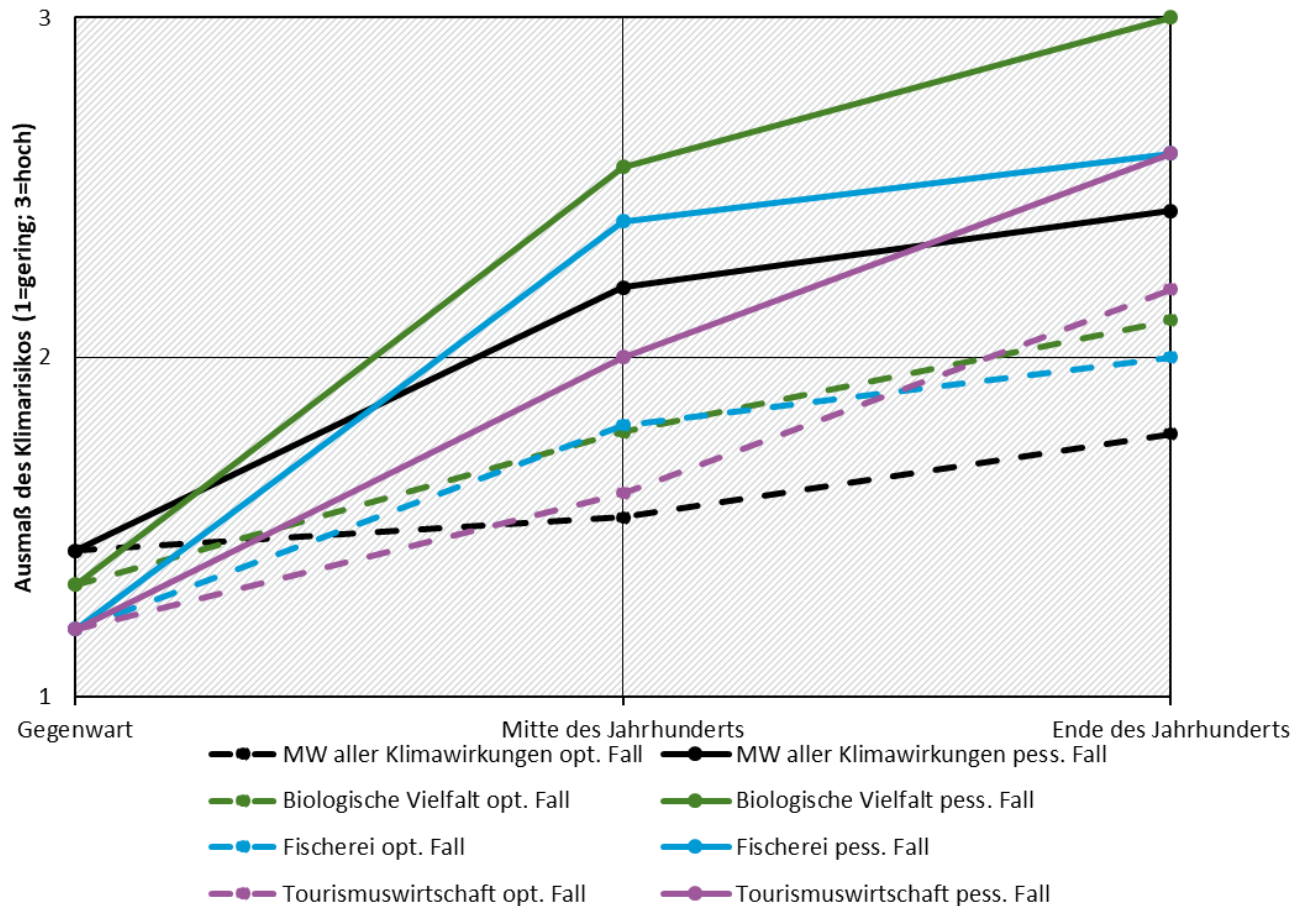

Hinweis: „MW“ steht in der Legende für Mittelwert, „opt.“ für optimistisch und „pess.“ für pessimistisch.

Quelle: eigene Darstellung, adelphi

Eine dritte Auffälligkeit ergibt sich, wenn der Blick gezielt auf jene Handlungsfelder gerichtet wird, für die im pessimistischen Fall schon für die Mitte des Jahrhunderts recht hohe Klimarisiken angenommen werden, unabhängig von ihrem gegenwärtigen durchschnittlichen Klimarisiko oder der projizierten Gesamtänderung (Abbildung 4). Methodisch bedingt kann für diese Handlungsfelder ein Sättigungseffekt in der Risikobewertung eintreten: Wird das Risiko für eine Klimawirkung schon zur Mitte des Jahrhunderts als „hoch“ eingeschätzt, also der höchsten der drei Risikostufen zugeordnet, so wird eine weitere Erhöhung in der Bewertung nicht sichtbar sein. In diesen Feldern könnten die Risikobewertungen für das Ende des Jahrhunderts also als Mindestwerte zu verstehen sein, die bei der Verwendung einer Skala mit mehr Spielraum nach oben eventuell als noch höher bewertet werden würden. Nicht ausgeschlossen ist dennoch, dass sich für einzelne Klimawirkungen, zum Beispiel aufgrund von Projektionsergebnissen, in der Bewertung nur ein geringfügiger Anstieg des Klimarisikos von der Mitte zum Ende des Jahrhunderts ergibt. Eine hohe Risikobewertung schon zur Mitte des Jahrhunderts betrifft besonders die Handlungsfelder „Biologische Vielfalt“, „Wasserhaushalt, Wasserwirtschaft“, „Wald- und Forstwirtschaft“, sowie „Küsten- und Meeresschutz“ mit besonders vielen Klimawirkungen im Be-

reich natürlicher Systeme und Ressourcen mit dem Potenzial der Auswirkungen auf andere Systeme (siehe 3.4). Dadurch kann es im Laufe der Zeit zu Kaskadeneffekten und zu erhöhten Klimarisiken, zum Beispiel bei naturnutzenden Wirtschaftssystemen, kommen.

**Abbildung 4: Handlungsfelder mit besonders hohen Risiken schon zur Mitte des Jahrhunderts**

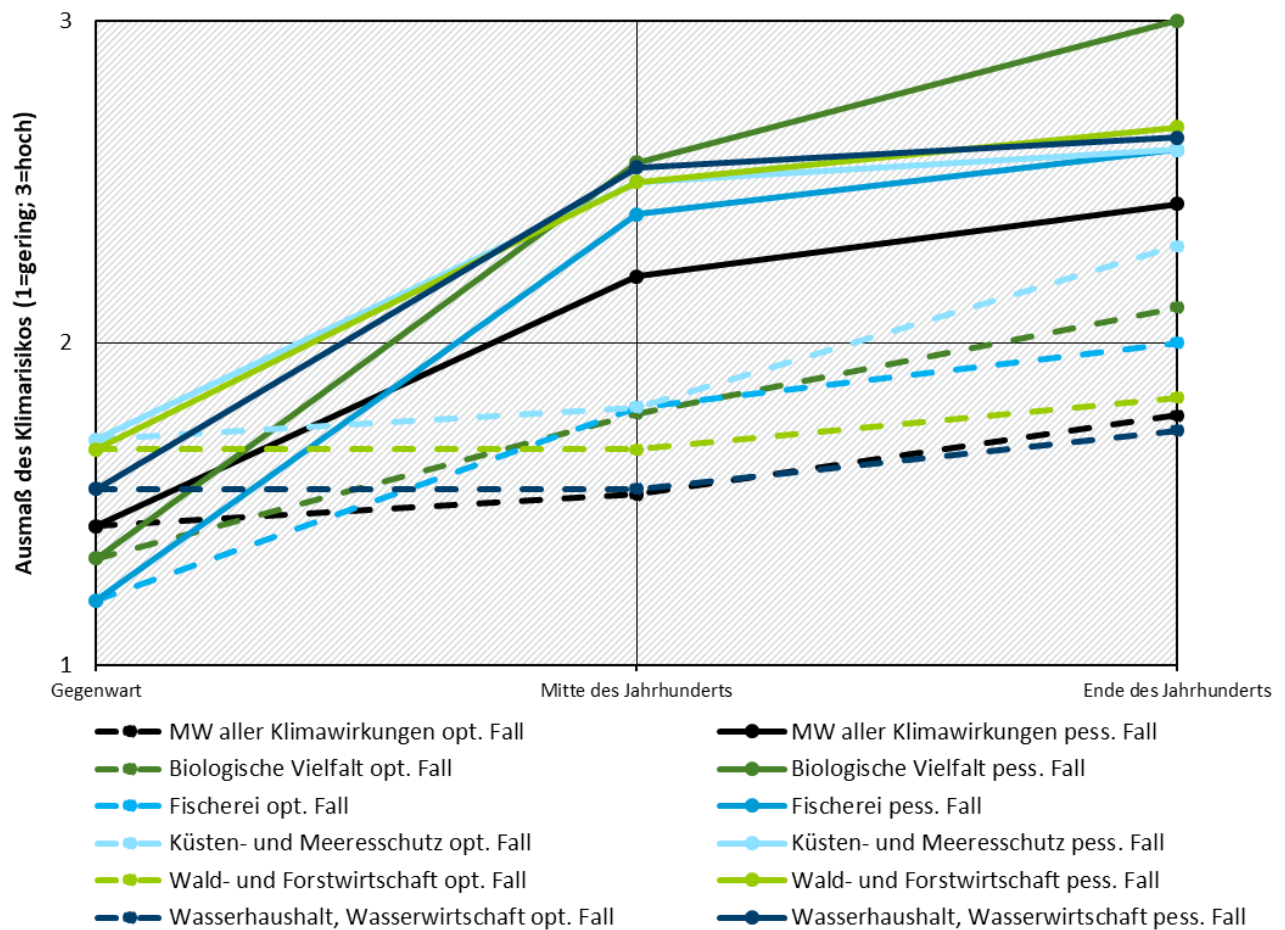

Hinweis: „MW“ steht in der Legende für Mittelwert, „opt.“ für optimistisch und „pess.“ für pessimistisch.

Quelle: eigene Darstellung, adelphi

### Vergleich der Klimarisiken im internationalen Kontext

Abschließend soll ein grober Vergleich der Ergebnisse der Bewertung der Klimarisiken der KWRA mit zwei aktuellen Klimarisiko- oder Vulnerabilitätsanalysen aus Großbritannien (HM Government 2017) und der Schweiz (BAFU 2017) sowie mit einer Studie der europäischen Umweltagentur zu Klimawirkungen und Vulnerabilität in Europa (EEA 2017) einen ersten Einblick in die Vergleichbarkeit der Resultate im internationalen Kontext geben.

Mit Blick auf die britische Klimarisikoanalyse aus dem Jahr 2017 (HM Government 2017) zeigt sich, dass die dort als Ergebnis der Analyse ermittelten sechs prioritären Risiko- und Handlungsbereiche große Übereinstimmungen mit entsprechenden Klimawirkungen der KWRA 2021 aufweisen, welche hohe Klimarisiken zeigen. Dies betrifft Klimawirkungen in Bezug auf Schäden an Gebäuden und Infrastruktur durch Hochwasser und Sturmfluten, gesundheitliche Risiken und Leistungseinbußen durch Hitzebelastung, Folgen von Niedrigwasserereignissen und Trockenperioden sowie Schäden an Ökosystemen, Böden und biologischer Vielfalt. Auch in der Klimarisikobetrachtung der Schweiz (BAFU 2017) sind die oben genannten Themen (abgesehen von Sturmfluten) größtenteils als prioritäre Risiken aufgeführt. Nicht explizit erwähnt werden in der

Schweizer Analyse Schäden an Böden durch Trockenheit oder Nässe. Die Studie der europäischen Umweltagentur fokussiert vor allem Indikatoren-basierte Auswirkungen des Klimawandels. Als besonders starke Auswirkungen werden beispielhaft die Verschiebung von Arealen und der Rückgang von Tier- und Pflanzenbeständen, die Ausbreitung invasiver Arten, ein gestiegenes Waldbrandrisiko, die Auswirkungen einer Zunahme an Hitzewellen, insbesondere in Städten, und Überflutungs- sowie Erosionsrisiken an Küsten genannt (EEA 2017). Für alle die genannten Themen werden in der KWRA 2021 hohe Klimarisiken ausgewiesen.

In geringerem Ausmaß betrachtet wurde in der KWRA 2021 der sechste Risiko- und Handlungsbereich der britischen Klimarisikoanalyse, welcher Risiken für die nationale und internationale Lebensmittelproduktion und den Handel diskutiert (HM Government 2017). In der KWRA 2021 wurden zwei Klimawirkungen behandelt, die einen kleinen Ausschnitt des genannten Risikobereichs darstellen („Ertragsausfälle“ in der Landwirtschaft und „Beeinträchtigung der Versorgung mit Rohstoffen und Zwischenprodukten (international)“ in der Wirtschaft) und zum Ende des Jahrhunderts hohe Klimarisiken aufweisen. Unterschiede zu den Ergebnissen der Klimarisikobetrachtung der Schweiz finden sich vor allem in Bezug auf die topographischen Bedingungen im Vergleich mit Deutschland. So werden in der Schweizer Analyse abnehmende Hangstabilität und häufigere Massenbewegungen als prioritäre Risiken hervorgehoben, welche in der KWRA 2021 lediglich geringe bis mittlere Klimarisiken zeigen. Weiterhin wird der Bedarf an Kühlenergie sowie die Zunahme an Verletzungen und Todesfällen infolge von Extremereignissen (hier insbesondere durch Hochwasser und Massenbewegungen) in der Schweizer Klimarisikoanalyse als prioritär eingestuft, während in der KWRA 2021 dafür nur geringe bis mittlere Klimarisiken vorliegen. Als zusätzliche prioritäre Risiken werden, ähnlich wie bei der britischen Analyse, indirekte Klimarisiken aufgeführt. Neben den bereits aufgeführten Aspekten der landwirtschaftlichen Ertragsausfälle und Änderungen der wirtschaftlichen Importe und Exporte, sieht die Schweizer Analyse zusätzlich noch klimabedingte Auswirkungen auf globale Migrationsströme sowie die Auswirkungen des Klimawandels auf die politische Stabilität und internationale Sicherheit als prioritäre Risikobereiche (BAFU 2017). Auch die Studie der europäischen Umweltbehörde betont die Relevanz geopolitischer und Sicherheitsrisiken in Zusammenhang mit indirekten Folgen des Klimawandels (EEA 2017).



### Kernaussagen des Vergleichs der Klimarisiken

- ▶ Auf der Ebene der Klimawirkungen wird eine deutliche Zunahme der Klimarisiken bis zum Ende des Jahrhunderts erwartet. So können zur Mitte des Jahrhunderts (im pessimistischen Fall) mehr als ein Drittel aller untersuchten Klimawirkungen hohe Klimarisiken aufweisen. Zum Ende des Jahrhunderts (im pessimistischen Fall) können bei mehr als der Hälfte der Klimawirkungen hohe Klimarisiken vorliegen.
- ▶ Im optimistischen Fall (günstige Szenarienkombination der Klimaprojektion und sozioökonomischen Projektion) werden die Klimarisiken deutlich geringer bewertet: Zur Mitte des Jahrhunderts zeigen nur zwei Klimawirkungen ein hohes Klimarisiko. Bis zum Ende des Jahrhunderts werden jedoch auch im optimistischen Fall für über ein Viertel aller Klimawirkungen hohe Risiken eingeschätzt.
- ▶ Auch die Klimarisiken, bewertet auf Ebene der Handlungsfelder insgesamt, können bis zum Ende des Jahrhunderts größtenteils deutlich zunehmen. Nahezu alle Handlungsfelder können bis dahin im pessimistischen Fall mittel-hohe oder hohe Klimarisiken aufweisen.
- ▶ Besonders viele Klimawirkungen mit hohem Klimarisiko gehören zu den Handlungsfeldern „Biologische Vielfalt“, „Wald- und Forstwirtschaft“, „Wasserhaushalt, Wasserwirtschaft“ und „Küsten- und Meeresschutz“, „Bauwesen“ und „Menschliche Gesundheit“. Als weniger stark beeinträchtigt werden die Handlungsfelder „Energiewirtschaft“ und „Industrie und Gewerbe“ eingeschätzt.
- ▶ Die zeitliche Dynamik bei den Handlungsfeldern ist unterschiedlich und sollte bei der Anpassungsplanung berücksichtigt werden: Große Bewertungsunterschiede zwischen dem pessimistischen und dem optimistischen Fall (Handlungsfelder „Boden“, „Landwirtschaft“, „Wasserhaushalt, Wasserwirtschaft“) könnten sich aus den hohen Bandbreiten der Projektion der relevanten niederschlagbezogenen klimatischen Einflüsse begründen lassen; vergleichsweise geringe Klimarisiken in der Gegenwart verbunden mit einem hohen Anstieg der Klimarisiken bis zum Ende des Jahrhunderts (Handlungsfelder „Biologische Vielfalt“, „Fischerei“, „Tourismuswirtschaft“) könnten ebenso wie frühzeitige hohe Klimarisiko-Bewertungen zu einer Unterschätzung der langfristigen Risiken führen.

## 2.2 Vergleich der Ergebnisse der KWRA 2021 mit denen der Vulnerabilitätsanalyse 2015

### Auswahl der Klimawirkungen

Die Studie „Vulnerabilität Deutschlands gegenüber dem Klimawandel“ aus dem Jahr 2015 (VA 2015) hat 72 Klimawirkungen in 14 Handlungsfeldern betrachtet (Buth et al. 2015). Das Handlungsfeld „Finanzwirtschaft“ wurde hier noch nicht als Querschnittsfeld behandelt. Die Empfehlung, das künftig zu tun, war ein Ergebnis der VA 2015. Für die KWRA 2021 wurden daher Klimawirkungen aus nur 13 Handlungsfeldern operationalisiert, insgesamt 102<sup>13</sup> an der Zahl.

Die Auswahl der Klimawirkungen erfolgte für beide Studien nach ähnlichen Kriterien: Für die VA 2015 war „die Wichtigkeit jeder Klimawirkung gemäß der sektoralen sowie der sektorenübergreifenden Bedeutung“ (Buth et al. 2015; S. 42) das zentrale Kriterium. Für die KWRA 2021 galt neben der Relevanz einer Klimawirkung noch der Wissenszuwachs – also ob es in den letzten

<sup>13</sup> Gezählt wurden hier alle Klimawirkungen, für die eine separate Bewertung der Klimarisiken vorgenommen wurde, auch wenn diese unter einer Überschrift operationalisiert/beschrieben wurden oder bei der Auswahl der Klimawirkungen noch den gleichen Titel hatten.



fünf Jahren neue wissenschaftliche Erkenntnisse gab –als Auswahlkriterium (siehe Teilbericht 1, „Konzept und Methodik“). Beurteilt wurden die Klimawirkungen in beiden Auswahlprozessen durch Mitglieder des Behördennetzwerks „Klimawandel und Anpassung“.

Im Zuge der KWRA 2021 wurden in den einzelnen Handlungsfeldern in der Regel mehr Klimawirkungen betrachtet als für die VA 2015. Ausnahmen sind die Handlungsfelder „Wald- und Forstwirtschaft“ und „Energiewirtschaft“. Da die Grundlage für die Auswahl der Klimawirkungen, die Wirkungsketten (UBA 2016), zwischen VA 2015 und KWRA 2021 grundlegend überarbeitet wurde und im Zuge der KWRA 2021 selbst Klimawirkungen der überarbeiteten Wirkungsketten zusätzlich zusammengelegt oder aufgeteilt wurden, lässt sich aus diesen Zahlen aber nicht ableiten, ob die Anzahl der bearbeiteten Teilthemen unterschiedlich war, weil vielfach die Klimawirkungen spezifischer zugeschnitten wurden. Dies ist größtenteils mit einem Wissenszuwachs zu erklären. So gab es in der VA 2015 beispielsweise eine Klimawirkung „Beeinträchtigung von Produktionsprozessen und Logistik“ im Handlungsfeld „Industrie und Gewerbe“. Für die KWRA 2021 wurde dieses Teilthema in zwei Klimawirkungen „Beeinträchtigung des internationalen Warentransports“ und „Beeinträchtigung von Produktionsprozessen“ getrennt. Bei vier Handlungsfeldern weicht die Anzahl und Auswahl der Klimawirkungen beider Studien auffallend voneinander ab:

- ▶ Im Handlungsfeld „Biologische Vielfalt“ wurden im Zuge der VA 2015 vier Klimawirkungen operationalisiert. Die KWRA 2021 betrachtet neun Klimawirkungen, die in Teilen deutlich spezifischer zugeschnitten sind, etwa „Schäden an Wäldern“.
- ▶ Im Handlungsfeld „Boden“ wurden im Rahmen der KWRA 2021 in doppelt so vielen Klimawirkungen sehr ähnliche Themen behandelt wie in der VA 2015.
- ▶ Im Handlungsfeld „Küsten- und Meeresschutz“ sind im Vergleich zur VA 2015 (drei Klimawirkungen) eine ganze Reihe von Teilthemen hinzugekommen (KWRA 2021: zehn Klimawirkungen), die in der VA 2015 als sogenannte „Klimawirkungen erster Ordnung“ nicht für eine separate Operationalisierung zur Auswahl standen<sup>14</sup>. Beispiele sind die Meerestemperatur, die Meeresspiegelhöhe und der Seegang.
- ▶ Im Handlungsfeld „Menschliche Gesundheit“ wurden neben den vier bereits im Zuge der VA 2015 operationalisierten Klimawirkungen vier neue Klimawirkungen untersucht, zum Beispiel „Allergische Reaktionen durch Aeroallergene pflanzlicher Herkunft“ oder „UV-bedingte Gesundheitsschädigungen“.

### **Bewertung der Klimarisiken für Deutschland und Bewertung der Handlungsfelder**

Im Folgenden wird die Bewertung der Klimarisiken in VA 2015 und KWRA 2021 verglichen, wo dies möglich ist, weil der Zuschnitt der Klimawirkungen zumindest ähnlich ist. Dabei muss berücksichtigt werden, dass die Bewertungsverfahren der beiden Analysen nicht identisch waren. Das jeweilige Verfahren ist in den Methodenkapiteln der beiden Berichte beschrieben (Buth et al. 2015; 32 ff.) (beziehungsweise Teilbericht 1, Kapitel „Konzept und Methodik“). Zu beachten ist insbesondere, dass die Bewertung der Bedeutung der Klimawirkungen für Deutschland bei der VA 2015 nicht für das Ende des Jahrhunderts erfolgte und hier daher nur die Ergebnisse für die Gegenwart und die Mitte des Jahrhunderts nebeneinandergestellt werden können. Dabei bezeichnen diese Begriffe in den beiden Studien nicht die gleichen Zeiträume. Die Referenzperiode der VA 2015 (in der Studie in der Regel als „Gegenwart“ bezeichnet) ist der Zeitraum 1961 bis

---

<sup>14</sup> In einigen Handlungsfeldern galten Klimawirkungen aus anderen Handlungsfeldern als „Klimawirkungen erster Ordnung“. So war die Klimawirkung „Hochwasser“ in verschiedenen Handlungsfeldern wie „Bauwesen“ eine Klimawirkung erster Ordnung, im Handlungsfeld „Wasserhaushalt, Wasserwirtschaft“ aber stand sie als Klimawirkung zweiter Ordnung zur Auswahl und wurde bearbeitet. Die Klimawirkungen erster Ordnung im Handlungsfeld „Küsten- und Meeresschutz“ aber standen in keinem anderen Handlungsfeld als Klimawirkungen zweiter Ordnung zur Auswahl.

1990, die Referenzperiode der KWRA 2021 ist der Zeitraum 1971 bis 2000. Für beide Analysen gilt allerdings, dass nicht alle in die Analyse eingeflossenen Parameter für die Referenzzeiträume mit Daten hinterlegt werden konnten. Insbesondere sozioökonomische Daten stellen häufig eine andere „Gegenwart“ dar als den Referenzzeitraum. Auch kann für beide Studien davon ausgegangen werden, dass bei der Bewertung der Klimawirkungen für die Gegenwart nicht nur der jeweilige Referenzzeitraum, sondern auch die jeweils aktuelle Gegenwart (also die Erfahrungen bis zu den Jahren, in denen bewertet wurde) Berücksichtigung gefunden hat. Als „Mitte des Jahrhunderts“ beziehungsweise „Nahe Zukunft“, so die Bezeichnung der VA 2015, galt in der VA 2015 der Zeitraum 2021 bis 2050, in der KWRA 2021 ist es der Zeitraum 2031 bis 2060. Die Bewertung der einzelnen Klimarisiken kann in den Studien also nicht nur aufgrund einer realen Veränderung der Bedeutung, sondern auch aufgrund von methodischen Unterschieden voneinander abweichen.

Um auch die Bewertung ganzer Handlungsfelder vergleichen zu können, wird die „Betroffenheit“ in der VA 2015 der „Bewertung der Klimarisiken der Handlungsfelder für Deutschland“ der KWRA 2021 gegenübergestellt. Die Betroffenheit der Handlungsfelder wurde im Zuge der VA 2015 auf Basis der Bedeutung ihrer Klimawirkungen für Deutschland in naher Zukunft im Fall eines starken Wandels rechnerisch ermittelt. In der KWRA 2021 haben die Netzwerkbehörden die Klimarisiken der Handlungsfelder für Deutschland bewertet, für alle betrachteten Zeiträume und differenziert nach optimistischem und pessimistischem Fall. Um hier zumindest eine gewisse Vergleichbarkeit herbeizuführen, wird die Bewertung der Klimarisiken der Handlungsfelder für die Mitte des Jahrhunderts und den pessimistischen Fall für den Vergleich herangezogen. Wird das Klimarisiko eines Handlungsfeldes für diesen Zeitraum jetzt höher bewertet als seine Betroffenheit im Zuge der VA 2015, werden seine Klimawirkungen insgesamt für Deutschland höher gewichtet als 2015.

#### **Vergleich der verwendeten Klimaszenarien (Vulnerabilitätsanalyse 2015 und KWRA 2021)**

In der KWRA 2021 wurden Klimaprojektionen regionalisiert und ausgewertet, die Teil des Modellvergleichsprojekts CMIP5 waren (Taylor et al. 2012) und erstmals im 5. Sachstandsbericht des Weltklimarats ausgewertet wurden. Datengrundlage der regionalen Klimaprojektionen waren die EURO-CORDEX Daten des World Climate Research Programme (WCRP) sowie die für Deutschland regionalisierten Projektionen des ReKliEs-Projektes (siehe Teilbericht 1, „Klimaprojektionen“). In der VA 2015 wurden Regionalisierungen der entsprechenden Projektionen des vorhergehenden CMIP3-Projekts wie im 4. Sachstandsbericht verwendet. Dabei haben sich die zur Regionalisierung verwendeten regionalen Klimamodelle, aber vor allem auch die übergeordneten globalen Klimamodelle sowie die berechneten Szenarien verändert, was für den Vergleich der Ergebnisse berücksichtigt werden muss.

Neben der Weiterentwicklung der globalen Klimamodelle (GCMs) von CMIP3 zu CMIP5 haben sich auch Änderungen in der Anzahl und Zusammensetzung der zu den jeweiligen Projektphasen beitragenden Modellierungsgruppen ergeben (VA 2015: 17 Simulationen mit fünf verschiedenen GCMs, KWRA 2021: 21 Simulationen mit sechs verschiedenen GCMs für das RCP8.5-Szenario). Die CMIP5-Modelle geben viele Aspekte des Klimasystems besser wieder als die älteren CMIP3-Modelle (Flato et al. 2013). Die Modelle unterscheiden sich auch darin, wie stark sie auf Änderungen der Treibhausgaskonzentrationen und anderer Klimateinflussfaktoren reagieren. Die „Klimasensitivität“ der Modelle, das heißt die Änderung der globalen Mitteltemperatur nach einer theoretischen Verdopplung der CO<sub>2</sub>-Konzentration, beträgt beispielsweise für HadCM3 und ECHAM5, die das Ensemble der VA 2015 dominieren, 3,3 Grad Celsius beziehungsweise 3,4 Grad Celsius (Randall

et al. 2007), während die Projektionen der KWRA 2021 wesentlich auf EC-EARTH mit 3,3 Grad Celsius (Wyser et al. 2020), MPI-ESM-LR mit 3,5 Grad Celsius und HadGEM2-ES mit 4,6 Grad Celsius (Meehl et al. 2020) beruhen, also diesbezüglich eine deutlich größere Bandbreite abdecken.

Den in der VA 2015 verwendeten Klimaprojektionen lag das Szenario A1B zugrunde, in der KWRA 2021 wurde das neuere RCP8.5-Szenario (van Vuuren et al. 2011) verwendet. Als pessimistischstes der RCP-Szenarien geht es von global steigenden CO<sub>2</sub>-Emissionen bis zum Ende des Jahrhunderts aus, mit nur minimalen Anstrengungen oder Erfolgen bei Klimaschutzmaßnahmen, und führt zum Ende des Jahrhunderts zu einem etwa 30 Prozent höherem Strahlungsantrieb des Klimas als A1B (Cubasch et al. 2001). Die tatsächlichen kumulierten Emissionen seit Szenariobeginn sind mit RCP8.5 kompatibel (Schwalm et al. 2020) oder liegen darunter (Hausfather und Peters 2020). A1B und RCP8.5 unterscheiden sich weiterhin in ihren Annahmen bezüglich der Emission anderer Schadstoffe (Aerosole), was kurz- bis mittelfristig auch relevant für die Klimaprojektionen ist.

Für die nächsten Jahrzehnte ähnelt die Kombination von CMIP5-Modellen mit dem RCP8.5-Szenario den älteren CMIP3-Modellen mit dem A1B-Szenario hinsichtlich der projizierten globalen Temperaturänderungen, nur die geringsten Temperaturänderungen der älteren Klimaszenarien liegen nun nicht mehr im wahrscheinlichen (5. bis 95. Perzentil) Bereich (IPCC 2013). Das gleiche gilt für die über Deutschland gemittelte Jahresmitteltemperatur in den regionalisierten Projektionen, die in der KWRA 2021 verwendet wurden im Vergleich zu denen der VA 2015. Die neuen Projektionen zeigen insgesamt höhere Anstiege der mittleren Sommer- und Wintertemperatur und eine größere Zunahme der Sommertage und Abnahme der Frosttage. Bezüglich der projizierten Zunahme der tropischen Nächte decken sie nun eine größere Bandbreite ab. Auch die Niederschlagsänderungen weisen eine größere Bandbreite in der KWRA 2021 auf als in der VA 2015, sowohl bezüglich der mittleren Änderungen als auch der Anzahl besonders nasser Tage (Niederschlag  $\geq 20$  mm) für den Sommer wie für den Winter. Dabei zeigen die Projektionen für den Sommer Niederschlagsrückgänge und -Zunahmen, das Vorzeichen der Änderungen ist also ungewiss, und für den Winter nur noch höhere Zunahmen (Hübener et al. 2017). Da die meisten weiteren Klimakennzahlen aus Temperatur- und Niederschlagsgrößen berechnet wurden, gelten für sie ähnliche Vergleichstendenzen.

Insgesamt sind also die Klimasignale der KWRA 2021, zumindest im Deutschlandmittel, tendenziell höher als die der VA 2015, stimmen aber ganz überwiegend im Vorzeichen der Änderung überein. Unterschiede lassen sich nicht einem einzelnen Faktor zuordnen, sondern setzen sich aus Änderungen in den berechneten Szenarien, den globalen Klimamodellen, und den regionalen Klimamodellen und/oder der Regionalisierungsmethode zusammen.

### Cluster I: Land

Das Klimarisiko des Handlungsfelds „Landwirtschaft“ insgesamt für die Mitte des Jahrhunderts und den pessimistischen Fall wurde im Rahmen der KWRA 2021 vom Behördennetzwerk als hoch bewertet. Die VA 2015 hatte eine mittlere Betroffenheit für dieses Handlungsfeld ergeben (Tabelle 4).

Deutlich zeichnet sich eine Zunahme der Klimarisiken „Abiotischer Stress (Pflanzen)“ und „Ertragsausfälle“ ab. Dies könnte, in den Erfahrungen mit den beiden Trockenjahren 2018 und 2019 begründet sein, die gezeigt haben, wie groß die Ertragseinbußen in Extremjahren schon jetzt sein können.

Das Klimarisiko in Bezug auf „Agrophänologische Phasen und Wachstumsperiode“ wurde im Zuge der KWRA 2021 hingegen geringer eingeschätzt als vor fünf Jahren.

**Tabelle 4: Vergleich der Klimarisiken in KWRA 2021 und VA 2015 Handlungsfeld „Landwirtschaft“**

| KWRA 2021 – Bewertung der Klimarisiken              |                                    |                      | VA 2015 – Bedeutung der Klimawirkungen             |                          |                |
|-----------------------------------------------------|------------------------------------|----------------------|----------------------------------------------------|--------------------------|----------------|
| Gegenwart                                           | Mitte des Jahrhunderts (2031-2060) |                      | Gegenwart                                          | Nahe Zukunft (2021-2050) |                |
|                                                     | Optimistischer Fall                | Pessimistischer Fall |                                                    | Schwacher Wandel         | Starker Wandel |
| Abiotischer Stress (Pflanzen)                       |                                    |                      | Schäden durch Extreme                              |                          |                |
| mittel                                              | mittel                             | hoch                 | gering                                             | gering                   | mittel         |
|                                                     |                                    |                      | Trocken- und Frostschäden                          |                          |                |
|                                                     |                                    |                      | gering                                             | gering                   | mittel         |
| Agrophänologische Phasen und Wachstumsperiode       |                                    |                      | Agrophänologische Phasen und Wachstumsperiode      |                          |                |
| gering                                              | gering                             | mittel               | mittel                                             | mittel                   | hoch           |
| Stress durch Schädlinge und Krankheiten (Pflanzen)  |                                    |                      | Schädlinge und Pflanzengesundheit                  |                          |                |
| gering                                              | gering                             | mittel               | gering                                             | gering                   | mittel         |
| Ertragsausfälle                                     |                                    |                      | Ertrag                                             |                          |                |
| mittel                                              | mittel                             | hoch                 | gering                                             | gering                   | gering         |
| <b>KWRA 2021 – Klimarisiko des Handlungsfeldes</b>  |                                    |                      | <b>VA 2015 – Betroffenheit des Handlungsfeldes</b> |                          |                |
| <b>Mitte des Jahrhunderts: Pessimistischer Fall</b> |                                    |                      | <b>Nahe Zukunft: Starker Wandel</b>                |                          |                |
| hoch                                                |                                    |                      | mittel                                             |                          |                |

Es werden nur die Klimawirkungen dargestellt, die in KWRA 2021 und VA 2015 vergleichbar abgegrenzt wurden.

Auch für das Klimarisiko des Handlungsfeldes „Wald- und Forstwirtschaft“ VA 2015 gibt es einen leichten Zuwachs des Klimarisikos (Tabelle 5).

Drei der fünf Klimawirkungen des Handlungsfeldes „Wald- und Forstwirtschaft“, die in KWRA 2021 und VA 2015 bearbeitet wurden, wurden in ihrem Klimarisiko gleich bewertet, bei zweien wird das Klimarisiko heute höher bewertet als vor fünf Jahren: Besonders deutlich ist das beim Hitze- und Trockenstress, bei dem die Klimawirkung für alle verglichenen Zeiträume und Szenarien nun höher eingeschätzt wird. Auch hier kann vermutet werden, dass die Extremjahre 2018 und 2019 zu diesem Zuwachs beigetragen haben.

Deutlich geringer ist der Zuwachs bei der Klimawirkung „Nutzfunktion: Ertrag“ (KWRA 2021) beziehungsweise „Nutzfunktionen“ (VA 2015), wo nun nur ein höheres Klimarisiko für die Gegenwart gesehen wird.

**Tabelle 5: Vergleich der Klimarisiken in KWRA 2021 und VA 2015 im Handlungsfeld „Wald- und Forstwirtschaft“**

| KWRA 2021 – Bewertung der Klimarisiken              |                                    |                      | VA 2015 – Bedeutung der Klimawirkungen             |                          |                |
|-----------------------------------------------------|------------------------------------|----------------------|----------------------------------------------------|--------------------------|----------------|
| Gegenwart                                           | Mitte des Jahrhunderts (2031-2060) |                      | Gegenwart                                          | Nahe Zukunft (2021-2050) |                |
|                                                     | Optimistischer Fall                | Pessimistischer Fall |                                                    | Schwacher Wandel         | Starker Wandel |
| Hitze- und Trockenstress                            |                                    |                      | Hitze- und Trockenstress                           |                          |                |
| mittel                                              | mittel                             | hoch                 | gering                                             | gering                   | mittel         |
| Stress durch Schädlinge/Krankheiten                 |                                    |                      | Schäden durch Schadorganismen                      |                          |                |
| mittel                                              | mittel                             | hoch                 | mittel                                             | mittel                   | hoch           |
| Schäden durch Windwurf                              |                                    |                      | Schäden durch Windwurf                             |                          |                |
| mittel                                              | mittel                             | mittel               | mittel                                             | mittel                   | mittel         |
| Waldbrandrisiko                                     |                                    |                      | Waldbrandrisiko                                    |                          |                |
| gering                                              | gering                             | mittel               | gering                                             | gering                   | mittel         |
| Nutzfunktion: Ertrag                                |                                    |                      | Nutzfunktionen                                     |                          |                |
| mittel                                              | mittel                             | hoch                 | gering                                             | mittel                   | hoch           |
| <b>KWRA 2021 – Klimarisiko des Handlungsfeldes</b>  |                                    |                      | <b>VA 2015 – Betroffenheit des Handlungsfeldes</b> |                          |                |
| <b>Mitte des Jahrhunderts: Pessimistischer Fall</b> |                                    |                      | <b>Nahe Zukunft: Starker Wandel</b>                |                          |                |
| hoch                                                |                                    |                      | mittel bis hoch                                    |                          |                |

Es werden nur die Klimawirkungen dargestellt, die in KWRA 2021 und VA 2015 vergleichbar abgegrenzt wurden.

Das Klimarisiko des Handlungsfeldes „Biologische Vielfalt“ für den pessimistischen Fall zur Mitte des Jahrhunderts hat sich gegenüber der in der VA 2015 ermittelten Betroffenheit nicht verändert, es wird noch immer ein mittleres bis hohes Klimarisiko gesehen (Tabelle 6). Trotzdem zeichnet sich ein zum Teil deutlicher Zuwachs bei der Bewertung der einzelnen in beiden Studien untersuchten Klimawirkungen ab, wie bei der „Ausbreitung invasiver Arten“. Hervorzuheben ist auch die Bewertung der Klimawirkung „Biotope und Habitate“ in der VA 2015, die gering bis mittel ausfiel. Den in der KWRA 2021 einzeln bewerteten Klimawirkungen „Schäden an wassergebundenen Habitaten und Feuchtgebieten“ und „Schäden an Wäldern“ aber wird ein mittleres bis hohes Klimarisiko beigemessen.

**Tabelle 6: Vergleich der Klimarisiken in KWRA 2021 und VA 2015 im Handlungsfeld „Biologische Vielfalt“**

| KWRA 2021 – Bewertung der Klimarisiken                   |                                    |                      | VA 2015 – Bedeutung der Klimawirkungen      |                          |                |
|----------------------------------------------------------|------------------------------------|----------------------|---------------------------------------------|--------------------------|----------------|
| Gegenwart                                                | Mitte des Jahrhunderts (2031-2060) |                      | Gegenwart                                   | Nahe Zukunft (2021-2050) |                |
|                                                          | Optimistischer Fall                | Pessimistischer Fall |                                             | Schwacher Wandel         | Starker Wandel |
| Ausbreitung invasiver Arten                              |                                    |                      | Ausbreitung invasiver Arten                 |                          |                |
| mittel                                                   | mittel                             | hoch                 | gering                                      | gering                   | hoch           |
| Verschiebung von Arealen und Rückgang der Bestände       |                                    |                      | Areale von Arten                            |                          |                |
| gering                                                   | mittel                             | mittel               | gering                                      | gering                   | mittel         |
| Schäden an Küstenökosystemen                             |                                    |                      | Biotope und Habitate                        |                          |                |
| gering                                                   | mittel                             | mittel               | gering                                      | gering                   | mittel         |
| Schäden an Gebirgsökosystemen                            |                                    |                      | gering                                      | gering                   | mittel         |
| gering                                                   | mittel                             | hoch                 |                                             |                          |                |
| Schäden an wassergebundenen Habitaten und Feuchtgebieten |                                    |                      |                                             |                          |                |
| mittel                                                   | mittel                             | hoch                 |                                             |                          |                |
| Schäden an Wäldern                                       |                                    |                      |                                             |                          |                |
| mittel                                                   | mittel                             | hoch                 |                                             |                          |                |
| KWRA 2021 – Klimarisiko des Handlungsfeldes              |                                    |                      | VA 2015 – Betroffenheit des Handlungsfeldes |                          |                |
| Mitte des Jahrhunderts: Pessimistischer Fall             |                                    |                      | Nahe Zukunft: Starker Wandel                |                          |                |
| mittel bis hoch                                          |                                    |                      | mittel bis hoch                             |                          |                |

Es werden nur die Klimawirkungen dargestellt, die in KWRA 2021 und VA 2015 vergleichbar abgegrenzt wurden.

In der Zusammenschau wurde das Handlungsfeld „Boden“ mit einem mittleren bis hohen Klimarisiko im Jahr 2020 ähnlich bewertet wie im Jahr 2015 (Tabelle 7).

Dennoch wurden „Bodenerosion“ und „Produktionsfunktionen“ in der KWRA 2021 als höher bedeutend eingeschätzt als in der VA 2015. Geringer als 2015 wurden hingegen die Klimawirkungen „Bodenbiologie“ und „Bodenstoffhaushalt“ bewertet.



**Tabelle 7: Vergleich der Klimarisiken in KWRA 2021 und VA 2015 im Handlungsfeld „Boden“**

| KWRA 2021 – Bewertung der Klimarisiken                                                                                                 |                                    |                      | VA 2015 – Bedeutung der Klimawirkungen                         |                          |                |
|----------------------------------------------------------------------------------------------------------------------------------------|------------------------------------|----------------------|----------------------------------------------------------------|--------------------------|----------------|
| Gegenwart                                                                                                                              | Mitte des Jahrhunderts (2031-2060) |                      | Gegenwart                                                      | Nahe Zukunft (2021-2050) |                |
|                                                                                                                                        | Optimistischer Fall                | Pessimistischer Fall |                                                                | Schwacher Wandel         | Starker Wandel |
| Bodenerosion durch Wasser                                                                                                              |                                    |                      | Bodenerosion durch Wasser und Wind / Hangrutschung             |                          |                |
| mittel                                                                                                                                 | mittel                             | hoch                 | gering                                                         | gering                   | mittel         |
| Bodenerosion durch Wind                                                                                                                |                                    |                      | gering                                                         | gering                   | mittel         |
| mittel                                                                                                                                 | mittel                             | hoch                 |                                                                |                          |                |
| Rutschungen und Muren                                                                                                                  |                                    |                      |                                                                |                          |                |
| gering                                                                                                                                 | gering                             | mittel               |                                                                |                          |                |
| Sickerwasser (Abnahme der Grundwasser-Neubildung)                                                                                      |                                    |                      | Bodenwassergehalt, Sickerwasser                                |                          |                |
| mittel                                                                                                                                 | mittel                             | hoch                 | mittel                                                         | mittel                   | hoch           |
| Bodenbiologie: Mikrobiologische Aktivität/ Zusammensetzung von Bodenorganismen/ Boden-Biodiversität/ Funktionalität der Zersetzerkette |                                    |                      | Boden-Biodiversität, mikrobielle Aktivität                     |                          |                |
| gering                                                                                                                                 | gering                             | mittel               | mittel                                                         | mittel                   | mittel         |
| Bodenstoffhaushalt: Organische Bodensubstanz, Stickstoff- und Phosphorhaushalt, Stoffausträge                                          |                                    |                      | Org. Bodensubstanz, N(P)-Haushalt, Stoffausträge               |                          |                |
| gering                                                                                                                                 | gering                             | mittel               | mittel                                                         | mittel                   | mittel         |
| Produktionsfunktionen                                                                                                                  |                                    |                      | Produktionsfunktionen (Standortstabilität, Bodenfruchtbarkeit) |                          |                |
| mittel                                                                                                                                 | mittel                             | hoch                 | gering                                                         | gering                   | mittel         |
| <b>KWRA 2021 – Klimarisiko des Handlungsfeldes</b>                                                                                     |                                    |                      | <b>VA 2015 – Betroffenheit des Handlungsfeldes</b>             |                          |                |
| <b>Mitte des Jahrhunderts: Pessimistischer Fall</b>                                                                                    |                                    |                      | <b>Nahe Zukunft: Starker Wandel</b>                            |                          |                |
| mittel bis hoch                                                                                                                        |                                    |                      | mittel bis hoch                                                |                          |                |

Es werden nur die Klimawirkungen dargestellt, die in KWRA 2021 und VA 2015 vergleichbar abgegrenzt wurden.

## Cluster II: Wasser

Das Klimarisiko des Handlungsfeldes „Fischerei“ wurde in der KWRA 2021 als „hoch“ angegeben (Mitte des Jahrhunderts, pessimistischer Fall). Dieses Ergebnis kommt einer leichten Steigerung verglichen mit der Bedeutung des Handlungsfeldes in der VA 2015 gleich (Tabelle 8).

Die Ergebnisse der VA 2015 und der KWRA 2021 im Handlungsfeld „Fischerei“ sind nur schwer zu vergleichen, da die VA 2015 in der Beschreibung der Klimawirkungen zum einen nicht scharf zwischen Seefischerei und Binnengewässern unterschieden hat. Zum anderen wurden in der VA 2015 nicht wie in der KWRA 2021 einzelne Arten im Detail betrachtet, sondern die Aussagen sind deutlich allgemeiner formuliert. Anzunehmen ist, dass die extrem unterschiedliche Detailtiefe der Ausarbeitung dieser Klimawirkungen mit dem großen Wissenszuwachs verbunden ist, auf den schon bei der Auswahl der Klimawirkungen hingewiesen wurde.

Wirklich vergleichbar sind nur die Bewertungsergebnisse für die Klimawirkung „Schäden an Aquakulturen“. Das Klimarisiko dieser Klimawirkung hat sich nicht verändert.

**Tabelle 8: Vergleich der Klimarisiken in KWRA 2021 und VA 2015 im Handlungsfeld „Fischerei“**

| KWRA 2021 – Bewertung der Klimarisiken              |                                    |                      | VA 2015 – Bedeutung der Klimawirkungen                       |                          |                |
|-----------------------------------------------------|------------------------------------|----------------------|--------------------------------------------------------------|--------------------------|----------------|
| Gegenwart                                           | Mitte des Jahrhunderts (2031-2060) |                      | Gegenwart                                                    | Nahe Zukunft (2021-2050) |                |
|                                                     | Optimistischer Fall                | Pessimistischer Fall |                                                              | Schwacher Wandel         | Starker Wandel |
| Entkopplung von Nahrungsbeziehungen in der Ostsee   |                                    |                      | Wachstum, Reproduktion und Sterblichkeit von Fischbeständen* |                          |                |
| mittel                                              | hoch                               | hoch                 | gering                                                       | mittel                   | hoch           |
| Verbreitung wärmeliebender Arten in der Nordsee     |                                    |                      | Gebietsfremde Arten, Artenspektrum*                          |                          |                |
| gering                                              | mittel                             | mittel               | mittel                                                       | mittel                   | hoch           |
| Schäden an Aquakulturen                             |                                    |                      | Aquakulturen (Schäden inklusive)                             |                          |                |
| gering                                              | gering                             | mittel               | gering                                                       | gering                   | mittel         |
| <b>KWRA 2021 – Klimarisiko des Handlungsfeldes</b>  |                                    |                      | <b>VA 2015 – Betroffenheit des Handlungsfeldes</b>           |                          |                |
| <b>Mitte des Jahrhunderts: Pessimistischer Fall</b> |                                    |                      | <b>Nahe Zukunft: Starker Wandel</b>                          |                          |                |
| hoch                                                |                                    |                      | mittel bis hoch                                              |                          |                |

Es werden nur die Klimawirkungen dargestellt, die in KWRA 2021 und VA 2015 vergleichbar abgegrenzt wurden.

\*Diese Klimawirkungen wurden in der VA 2015 nur für die Meere operationalisiert und bewertet. Zudem muss berücksichtigt werden: Die Klimawirkung „Entkopplung von Nahrungsbeziehungen in der Ostsee“ beschreibt zwar einen Teil der Klimawirkung „Wachstum, Reproduktion und Sterblichkeit von Fischbeständen“, doch der Zuschnitt der Klimawirkungen in KWRA 2021 und VA 2015 ist so verschieden, dass ein Vergleich der beiden Bewertungen nicht sinnvoll ist. Gleiches gilt für die Klimawirkungen „Verbreitung wärmeliebender Arten in der Nordsee“ und „Gebietsfremde Arten, Artenspektrum“. Diese Klimawirkungen sind nur der Vollständigkeit halber in der Tabelle aufgeführt.

Das Handlungsfeld „Küsten- und Meeresschutz“ hat im pessimistischen Fall zur Mitte des Jahrhunderts ein hohes Klimarisiko (Tabelle 9) wie schon bei der VA 2015.

Bei der Gesamtbewertung des Handlungsfeldes fällt auf, dass dennoch zwei der drei Klimawirkungen, die sowohl in der VA 2015 als auch in der KWRA 2021 bewertet wurden, ihre Bewertung als potenziell hohe Klimarisiken verloren haben, weil bei der KWRA 2021 die Sturmflut unabhängig vom Meeresspiegelanstieg bewertet wurde. Weder die Klimawirkung „Sturmfluten“ noch die Klimawirkung „Beschädigung oder Zerstörung von Siedlung und Infrastruktur an der Küste“ wurde für den pessimistischen Fall zur Mitte des Jahrhunderts im Zuge der KWRA 2021 mit einem hohen Klimarisiko bewertet. Die Klimawirkung „Naturräumliche Veränderungen an Küsten“ hingegen weist in der Gegenwart ein höheres Klimarisiko auf.

**Tabelle 9: Vergleich der Klimarisiken in KWRA 2021 und VA 2015 im Handlungsfeld „Küsten- und Meeresschutz“**

| KWRA 2021 – Bewertung der Klimarisiken                                   |                                    |                      | VA 2015 – Bedeutung der Klimawirkungen             |                          |                |
|--------------------------------------------------------------------------|------------------------------------|----------------------|----------------------------------------------------|--------------------------|----------------|
| Gegenwart                                                                | Mitte des Jahrhunderts (2031-2060) |                      | Gegenwart                                          | Nahe Zukunft (2021-2050) |                |
|                                                                          | Optimistischer Fall                | Pessimistischer Fall |                                                    | Schwacher Wandel         | Starker Wandel |
| Sturmfluten                                                              |                                    |                      | Sturmfluten                                        |                          |                |
| mittel                                                                   | mittel                             | mittel               | mittel                                             | mittel                   | hoch           |
| Naturräumliche Veränderungen an Küsten                                   |                                    |                      | Schäden an Küsten (naturräumliche Veränderungen)   |                          |                |
| mittel                                                                   | mittel                             | hoch                 | gering                                             | mittel                   | hoch           |
| Beschädigung oder Zerstörung von Siedlung und Infrastruktur an der Küste |                                    |                      | Belastung von Bauwerken und Infrastrukturen        |                          |                |
| gering                                                                   | gering                             | mittel               | gering                                             | gering                   | hoch           |
| <b>KWRA 2021 – Klimarisiko des Handlungsfeldes</b>                       |                                    |                      | <b>VA 2015 – Betroffenheit des Handlungsfeldes</b> |                          |                |
| <b>Mitte des Jahrhunderts: Pessimistischer Fall</b>                      |                                    |                      | <b>Nahe Zukunft: Starker Wandel</b>                |                          |                |
| hoch                                                                     |                                    |                      | hoch                                               |                          |                |

Es werden nur die Klimawirkungen dargestellt, die in KWRA 2021 und VA 2015 vergleichbar abgegrenzt wurden.

Das Klimarisiko des Handlungsfeldes „Wasserhaushalt, Wasserwirtschaft“ wurde im Zuge der KWRA 2021 für den pessimistischen Fall zur Mitte des Jahrhunderts als leicht höher bewertet (Tabelle 10) als bei der VA 2015.

Die Klimarisiken bei Klimawirkungen, die Änderungen der Wasserquantität beschreiben, sind gleichgeblieben. Ausnahme ist die Klimawirkung „Grundwasserstand und Grundwasserqualität“, bei der Quantität und Qualität zusammen bewertet wurden. Die Folgen für die menschliche Infrastruktur wurden mit der Klimawirkung „Einschränkungen der Funktionsfähigkeit von Kanalnetzen und Vorflutern und Kläranlagen“ sogar mit einem geringeren Klimarisiko bewertet als 2015. Für jene Klimawirkungen aber, die die Folgen des Klimawandels auf die Gewässerqualität beschreiben („Gewässertemperatur und Eisbedeckung und biologische Wasserqualität“, „Chemische Wasserqualität“ sowie „Grundwasserstand und Grundwasserqualität“), wird ein höheres Klimarisiko gesehen als noch 2015. Das spricht dafür, Qualität und Quantität im Wasserbereich (auf künftig) konsequent getrennt zu betrachten und zu bewerten.

**Tabelle 10: Vergleich der Klimarisiken in KWRA 2021 und VA 2015 im Handlungsfeld „Wasserhaushalt, Wasserwirtschaft“**

| KWRA 2021 – Bewertung der Klimarisiken                                                        |                                    |                      | VA 2015 – Bedeutung der Klimawirkungen             |                          |                |
|-----------------------------------------------------------------------------------------------|------------------------------------|----------------------|----------------------------------------------------|--------------------------|----------------|
| Gegenwart                                                                                     | Mitte des Jahrhunderts (2031-2060) |                      | Gegenwart                                          | Nahe Zukunft (2021-2050) |                |
|                                                                                               | Optimistischer Fall                | Pessimistischer Fall |                                                    | Schwacher Wandel         | Starker Wandel |
| Hochwasser                                                                                    |                                    |                      | Flusshochwasser und Sturzfluten                    |                          |                |
| mittel                                                                                        | mittel                             | hoch                 | mittel                                             | mittel                   | hoch           |
| Sturzfluten (Versagen von Entwässerungseinrichtungen und Überflutungsschutzsystemen)          |                                    |                      |                                                    |                          |                |
| mittel                                                                                        | mittel                             | hoch                 |                                                    |                          |                |
| Einschränkungen der Funktionsfähigkeit von Kanalnetzen und Vorflutern und Kläranlagen         |                                    |                      | Auswirkung auf Kanalnetz und Kläranlagen           |                          |                |
| gering                                                                                        | gering                             | mittel               | mittel                                             | mittel                   | hoch           |
| Gewässertemperatur und Eisbedeckung und biologische Wasserqualität (Eutrophierung, Blaualgen) |                                    |                      | Gewässerzustand                                    |                          |                |
| mittel                                                                                        | mittel                             | hoch                 | gering                                             | gering                   | mittel         |
| Chemische Wasserqualität                                                                      |                                    |                      |                                                    |                          |                |
| mittel                                                                                        | mittel                             | mittel               |                                                    |                          |                |
| Mangel an Bewässerungswasser                                                                  |                                    |                      | Wasserverfügbarkeit aus Oberflächengewässern       |                          |                |
| gering                                                                                        | gering                             | mittel               | gering                                             | gering                   | mittel         |
| Grundwasserstand und Grundwasserqualität                                                      |                                    |                      | Wasserverfügbarkeit aus Grundwasser                |                          |                |
| gering                                                                                        | gering                             | hoch                 | gering                                             | gering                   | mittel         |
| Trinkwasser                                                                                   |                                    |                      | Trinkwasserverfügbarkeit                           |                          |                |
| gering                                                                                        | gering                             | mittel               | gering                                             | gering                   | mittel         |
| <b>KWRA 2021 – Klimarisiko des Handlungsfeldes</b>                                            |                                    |                      | <b>VA 2015 – Betroffenheit des Handlungsfeldes</b> |                          |                |
| <b>Mitte des Jahrhunderts: Pessimistischer Fall</b>                                           |                                    |                      | <b>Nahe Zukunft: Starker Wandel</b>                |                          |                |
| hoch                                                                                          |                                    |                      | mittel bis hoch                                    |                          |                |

Es werden nur die Klimawirkungen dargestellt, die in KWRA 2021 und VA 2015 vergleichbar abgegrenzt wurden.

### Cluster III: Infrastruktur

Das Klimarisiko des Handlungsfelds „Verkehr, Verkehrsinfrastruktur“ hat in der Zusammenschau leicht abgenommen (Tabelle 11).

Die einzelnen Klimawirkungen in diesem Handlungsfeld lassen sich nur schwer vergleichen. Gründe dafür sind große Abweichungen im Zuschnitt und in der Auswahl der Klimawirkungen. Zwei der Klimawirkungen aber lassen sich vergleichen: Die Klimawirkung „Schiffbarkeit der Binnenwasserstraßen (Niedrigwasser)“ wird heute mit einem potenziell höheren Klimarisiko in der Mitte des Jahrhunderts bewertet. Hingegen wurde die Klimawirkung „Schäden/Hindernisse bei Straßen und Schienenwegen (Hochwasser)“ im Zuge der KWRA 2021 deutlich niedriger bewertet als im Jahr 2015.

**Tabelle 11: Vergleich der Klimarisiken in KWRA 2021 und VA 2015 im Handlungsfeld „Verkehr, Verkehrsinfrastruktur“**

| KWRA 2021 – Bewertung der Klimarisiken                                                      |                                    |                      | VA 2015 – Bedeutung der Klimawirkungen                                      |                          |                |
|---------------------------------------------------------------------------------------------|------------------------------------|----------------------|-----------------------------------------------------------------------------|--------------------------|----------------|
| Gegenwart                                                                                   | Mitte des Jahrhunderts (2031-2060) |                      | Gegenwart                                                                   | Nahe Zukunft (2021-2050) |                |
|                                                                                             | Optimistischer Fall                | Pessimistischer Fall |                                                                             | Schwacher Wandel         | Starker Wandel |
| Schiffbarkeit der Binnenwasserstraßen (Niedrigwasser)                                       |                                    |                      | Schiffbarkeit von Binnenschiffahrtsstraßen                                  |                          |                |
| mittel                                                                                      | mittel                             | hoch                 | gering                                                                      | mittel                   | mittel         |
| Schäden/Hindernisse bei Straßen und Schienenwegen (Hochwasser)                              |                                    |                      | Überschwemmung und Unterspülung von Straßen und Schieneninfrastruktur       |                          |                |
| gering                                                                                      | gering                             | mittel               | mittel                                                                      | mittel                   | hoch           |
| KWRA 2021 – Klimarisiko des Handlungsfeldes<br>Mitte des Jahrhunderts: Pessimistischer Fall |                                    |                      | VA 2015 – Betroffenheit des Handlungsfeldes<br>Nahe Zukunft: Starker Wandel |                          |                |
| mittel                                                                                      |                                    |                      | mittel bis hoch                                                             |                          |                |

Es werden nur die Klimawirkungen dargestellt, die in KWRA 2021 und VA 2015 vergleichbar abgegrenzt wurden.

Die Betroffenheit des Handlungsfeldes „Bauwesen“ zeigt einen leichten Rückgang in der Bewertung (Tabelle 12).

Die Bewertungen der in beiden Studien analysierten Klimawirkungen sind hingegen weitgehend gleichgeblieben. Eine Verringerung zeigt sich bei der Klimawirkung „Schäden an Gebäuden aufgrund von Starkregen“, die 2015 zusammen mit der Klimawirkung „Schäden an Gebäuden aufgrund von Flusshochwasser“ bewertet wurde.

**Tabelle 12: Vergleich der Klimarisiken in KWRA 2021 und VA 2015 im Handlungsfeld „Bauwesen“**

| KWRA 2021 – Bewertung der Klimarisiken                                                      |                                    |                      | VA 2015 – Bedeutung der Klimawirkungen                                      |                          |                |
|---------------------------------------------------------------------------------------------|------------------------------------|----------------------|-----------------------------------------------------------------------------|--------------------------|----------------|
| Gegenwart                                                                                   | Mitte des Jahrhunderts (2031-2060) |                      | Gegenwart                                                                   | Nahe Zukunft (2021-2050) |                |
|                                                                                             | Optimistischer Fall                | Pessimistischer Fall |                                                                             | Schwacher Wandel         | Starker Wandel |
| Schäden an Gebäuden aufgrund von Flusshochwasser                                            |                                    |                      | Schäden an Gebäuden und Infrastruktur durch Flusshochwasser und Sturzfluten |                          |                |
| mittel                                                                                      | mittel                             | hoch                 | mittel                                                                      | mittel                   | hoch           |
| Schäden an Gebäuden aufgrund von Starkregen                                                 |                                    |                      |                                                                             |                          |                |
| mittel                                                                                      | mittel                             | mittel               |                                                                             |                          |                |
| Stadtklima/Wärmeinseln                                                                      |                                    |                      | Stadtklima und Luftqualität                                                 |                          |                |
| mittel                                                                                      | mittel                             | hoch                 | mittel                                                                      | mittel                   | hoch           |
| Innenraumklima                                                                              |                                    |                      | Innenraumklima und Kühlung                                                  |                          |                |
| mittel                                                                                      | mittel                             | hoch                 | mittel                                                                      | mittel                   | hoch           |
| KWRA 2021 – Klimarisiko des Handlungsfeldes<br>Mitte des Jahrhunderts: Pessimistischer Fall |                                    |                      | VA 2015 – Betroffenheit des Handlungsfeldes<br>Nahe Zukunft: Starker Wandel |                          |                |
| mittel bis hoch                                                                             |                                    |                      | hoch                                                                        |                          |                |

Es werden nur die Klimawirkungen dargestellt, die in KWRA 2021 und VA 2015 vergleichbar abgegrenzt wurden.

Die Gesamtbewertung des Handlungsfeldes „Energiewirtschaft“ ergab ein geringeres Klimarisiko (Tabelle 13).

Auch bei das Klimarisiko für die Klimawirkungen „Bedarf an Kühlenergie“, „Bedarf an Heizenergie“ und „Kühlwasser für thermische Kraftwerke“ wurde geringer eingeschätzt als 2015.

**Tabelle 13: Vergleich der Klimarisiken in KWRA 2021 und VA 2015 im Handlungsfeld „Energiewirtschaft“**

| KWRA 2021 – Bewertung der Klimarisiken                                                           |                                    |                       | VA 2015 – Bedeutung der Klimawirkungen             |                          |                |
|--------------------------------------------------------------------------------------------------|------------------------------------|-----------------------|----------------------------------------------------|--------------------------|----------------|
| Gegenwart                                                                                        | Mitte des Jahrhunderts (2031-2060) |                       | Gegenwart                                          | Nahe Zukunft (2021-2050) |                |
|                                                                                                  | Optimistischer Fall                | Pessimistischer Fall* |                                                    | Schwacher Wandel         | Starker Wandel |
| Bedarf an Kühlenergie                                                                            |                                    |                       | Bedarf an Kühlenergie                              |                          |                |
| gering                                                                                           | gering                             | gering                | gering                                             | gering                   | mittel         |
| Bedarf an Heizenergie*                                                                           |                                    |                       | Bedarf an Heizenergie                              |                          |                |
| gering                                                                                           | gering                             | gering                | gering                                             | gering                   | mittel         |
| Mangelndes Kühlwasser für thermische Kraftwerke                                                  |                                    |                       | Kühlwasser für thermische Kraftwerke               |                          |                |
| gering                                                                                           | gering                             | gering                | mittel                                             | gering                   | mittel         |
| Ertragsminderung/-zunahme bei Photovoltaikanlagen und bei Windenergieanlagen an Land und auf See |                                    |                       | Windenergienutzung an Land und auf See             |                          |                |
| gering                                                                                           | gering                             | gering                | gering                                             | gering                   | gering         |
| Fehlende Zuverlässigkeit der Energieversorgung                                                   |                                    |                       | Zuverlässigkeit der Energieversorgung              |                          |                |
| gering                                                                                           | gering                             | gering                | gering                                             | gering                   | gering         |
| <b>KWRA 2021 – Klimarisiko des Handlungsfeldes</b>                                               |                                    |                       | <b>VA 2015 – Betroffenheit des Handlungsfeldes</b> |                          |                |
| <b>Mitte des Jahrhunderts: Pessimistischer Fall</b>                                              |                                    |                       | <b>Nahe Zukunft: Starker Wandel</b>                |                          |                |
| gering                                                                                           |                                    |                       | gering-mittel                                      |                          |                |

Es werden nur die Klimawirkungen dargestellt, die in KWRA 2021 und VA 2015 vergleichbar abgegrenzt wurden.

\* Für die Klimawirkung „Bedarf an Heizenergie“ wurde im Rahmen der KWRA 2021 nicht ein „pessimistischer Fall“ für die Mitte des Jahrhunderts, sondern stattdessen ein „chancenarmer Fall“ bewertet.

#### Cluster IV: Wirtschaft

Die Gesamtbewertung des Handlungsfeldes „Tourismuswirtschaft“ hat sich leicht erhöht (Tabelle 14). Die Klimawirkungen dieses Handlungsfeldes haben bis zur Mitte des Jahrhunderts nur ein geringes oder mittleres Klimarisiko, da sind sich KWRA 2021 und VA 2015 einig. Nur bedingt vergleichbar sind die in Tabelle 14 gegenübergestellten Klimawirkungen „Klimabedingte Anforderungen an touristische Infrastruktur“ (VA 2015) und „Einschränkung touristischer Angebote: Wintertourismus“ (KWRA 2021), auch wenn die durch die abnehmende Schneesicherheit bedingten Veränderungen der Ansprüche an die touristische Infrastruktur in klassischen Wintersportregionen ein wichtiger Aspekt der Klimawirkung „Klimabedingte Anforderungen an touristische Infrastruktur“ war.

Die auffälligste Abweichung in der Bewertung zeigt die Klimawirkung „Schäden an touristischen Infrastrukturen und Betriebsunterbrechungen“, für die heute für die Mitte des Jahrhunderts ein höheres Klimarisiko angenommen wird als noch vor fünf Jahren.



**Tabelle 14: Vergleich der Klimarisiken in KWRA 2021 und VA 2015 im Handlungsfeld „Tourismuswirtschaft“**

| KWRA 2021 – Bewertung der Klimarisiken                               |                                    |                      | VA 2015 – Bedeutung der Klimawirkungen                     |                          |                |
|----------------------------------------------------------------------|------------------------------------|----------------------|------------------------------------------------------------|--------------------------|----------------|
| Gegenwart                                                            | Mitte des Jahrhunderts (2031-2060) |                      | Gegenwart                                                  | Nahe Zukunft (2021-2050) |                |
|                                                                      | Optimistischer Fall                | Pessimistischer Fall |                                                            | Schwacher Wandel         | Starker Wandel |
| Einschränkung touristischer Angebote: Wintertourismus                |                                    |                      | Klimabedingte Anforderungen an touristische Infrastruktur* |                          |                |
| gering                                                               | mittel                             | mittel               | gering                                                     | gering                   | mittel         |
| Schäden an touristischen Infrastrukturen und Betriebsunterbrechungen |                                    |                      | Betriebsunterbrechungen                                    |                          |                |
| gering                                                               | mittel                             | mittel               | gering                                                     | gering                   | gering         |
| Verlagerung der Nachfrage                                            |                                    |                      | Saisonale und regionale Nachfrageverschiebung              |                          |                |
| gering                                                               | gering                             | mittel               | gering                                                     | gering                   | mittel         |
| KWRA 2021 – Klimarisiko des Handlungsfeldes                          |                                    |                      | VA 2015 – Betroffenheit des Handlungsfeldes                |                          |                |
| Mitte des Jahrhunderts: Pessimistischer Fall                         |                                    |                      | Nahe Zukunft: Starker Wandel                               |                          |                |
| mittel                                                               |                                    |                      | gering bis mittel                                          |                          |                |

Es werden nur die Klimawirkungen dargestellt, die in KWRA 2021 und VA 2015 vergleichbar abgegrenzt wurden.

\* Die Klimawirkung „Klimabedingte Anforderungen an touristische Infrastruktur“ der VA 2015 umfasste mehr als Einschränkungen wintertouristischer Angebote, die Folgen des Klimawandels für Wintersportgebiete in Bayern und Baden-Württemberg wurden aber besonders hervorgehoben.

Die Gesamtbewertung des Handlungsfeldes „Industrie und Gewerbe“ ist analog zu der des Handlungsfeldes „Tourismuswirtschaft“ von gering bis mittel auf mittel gestiegen (Tabelle 15). Es gibt dennoch mehrere Klimawirkungen, deren Klimarisiken in der KWRA 2021 geringer bewertet wurde als vor fünf Jahren, insbesondere die „Beeinträchtigung des landgestützten Warenverkehrs (Inland)“.

Die „Bedingungen auf Absatzmärkten (international)“ hingegen und der „Wasserbedarf“ werden heute für den pessimistischen Fall in der Mitte des Jahrhunderts mit einem höheren Klimarisiko als noch in der VA 2015 angesehen, der Wasserbedarf auch für die Gegenwart.

**Tabelle 15: Vergleich der Klimarisiken in KWRA 2021 und VA 2015 im Handlungsfeld „Industrie und Gewerbe“**

| KWRA 2021 – Bewertung der Klimarisiken                          |                                    |                      | VA 2015 – Bedeutung der Klimawirkungen                        |                          |                |
|-----------------------------------------------------------------|------------------------------------|----------------------|---------------------------------------------------------------|--------------------------|----------------|
| Gegenwart                                                       | Mitte des Jahrhunderts (2031-2060) |                      | Gegenwart                                                     | Nahe Zukunft (2021-2050) |                |
|                                                                 | Optimistischer Fall                | Pessimistischer Fall |                                                               | Schwacher Wandel         | Starker Wandel |
| Bedingungen auf Absatzmärkten (international)                   |                                    |                      | Klimawirkungen auf Absatzmärkte                               |                          |                |
| gering                                                          | gering                             | mittel               | gering                                                        | gering                   | gering         |
| Beeinträchtigung des landgestützten Warenverkehrs (Inland)      |                                    |                      | Beeinträchtigung des landgestützten Warenverkehrs             |                          |                |
| gering                                                          | gering                             | mittel               | mittel                                                        | mittel                   | hoch           |
| Energieverbrauch und Beeinträchtigung bei der Energieversorgung |                                    |                      | Verfügbarkeit von Energie                                     |                          |                |
| gering                                                          | gering                             | gering               | gering                                                        | gering                   | gering         |
|                                                                 |                                    |                      | Energieverbrauch für Kühlung                                  |                          |                |
|                                                                 |                                    |                      | gering                                                        | gering                   | mittel         |
| Wasserbedarf                                                    |                                    |                      | Beeinträchtigung der Produktion auf Grund von Wasserknappheit |                          |                |
| mittel                                                          | gering                             | mittel               | gering                                                        | gering                   | gering         |
| Freisetzung gefährlicher Stoffe                                 |                                    |                      | Gefahr einer möglichen Freisetzung von gefährlichen Stoffen   |                          |                |
| gering                                                          | mittel                             | mittel               | mittel                                                        | mittel                   | mittel         |
| Beeinträchtigung von Produktionsprozessen                       |                                    |                      | Beeinträchtigung von Produktionsprozessen und Logistik        |                          |                |
| gering                                                          | gering                             | gering               | gering                                                        | gering                   | mittel         |
| Beeinträchtigung des internationalen Warenverkehrs              |                                    |                      |                                                               |                          |                |
| gering                                                          | gering                             | mittel               |                                                               |                          |                |
| Aufwand für die betriebliche Planung                            |                                    |                      | Planungsprozesse für Betriebsabläufe                          |                          |                |
| gering                                                          | gering                             | gering               | gering                                                        | gering                   | mittel         |
| <b>KWRA 2021 – Klimarisiko des Handlungsfeldes</b>              |                                    |                      | <b>VA 2015 – Betroffenheit des Handlungsfeldes</b>            |                          |                |
| <b>Mitte des Jahrhunderts: Pessimistischer Fall</b>             |                                    |                      | <b>Nahe Zukunft: Starker Wandel</b>                           |                          |                |
| mittel                                                          |                                    |                      | gering bis mittel                                             |                          |                |

Es werden nur die Klimawirkungen dargestellt, die in KWRA 2021 und VA 2015 vergleichbar abgegrenzt wurden.

### Cluster V: Gesundheit

Auch das Klimarisiko des Handlungsfelds „Menschliche Gesundheit“ hat, vergleicht man die Ergebnisse der KWRA 2021 und der VA 2015, von „gering bis mittel“ nach „mittel“ zugenommen (Tabelle 16). Bereits bei der Auswahl der Klimawirkungen wurde deutlich, dass für die KWRA 2021 mehr Klimawirkungen als relevant angesehen wurden.<sup>15</sup>

<sup>15</sup> Zusätzlich zu den in Tabelle 16 aufgeführten Klimawirkungen wurden im Rahmen der KWRA im Handlungsfeld „Menschliche Gesundheit“ auch folgende Klimawirkungen untersucht: „Allergische Reaktionen durch Aeroallergene pflanzlicher Herkunft (zum Beispiel Pollen)“, „Potenziell schädliche Mikroorganismen und Algen“, „UV-bedingte Gesundheitsschädigungen (insbesondere Hautkrebs)“ sowie „Verletzungen und Todesfälle infolge von Extremereignissen“.

Von den einzelnen Klimawirkungen, die in beiden Analysen bearbeitet wurden, wurde jedoch nur eine jetzt höher bewertet als vor fünf Jahren: die Klimawirkung „Auswirkungen auf das Gesundheitssystem“. Die Klimawirkungen „Atembeschwerden (aufgrund von Luftverunreinigungen)“ und „Verbreitung und Abundanzveränderung von möglichen Vektoren“ werden mit der für die vorliegende Studie angewandten Methodik heute hingegen eher mit geringeren Klimarisiken eingeschätzt als vor fünf Jahren (zumindest für einzelne Zeiträume oder Fälle). Die zu „Atembeschwerden (aufgrund von Luftverunreinigungen)“ äquivalente Klimawirkung „Atembeschwerden durch bodennahes Ozon“ wurde 2015 sogar noch als potenziell hohes Klimarisiko in naher Zukunft bewertet. Diese Klimawirkung konnte aufgrund fehlender belastbarer Projektionen von bodennahem Ozon in den zukünftigen Zeiträumen (Mitte und Ende des Jahrhunderts) nicht weiterverfolgt werden.

**Tabelle 16: Vergleich der Klimarisiken in KWRA 2021 und VA 2015 im Handlungsfeld „Menschliche Gesundheit“**

| KWRA 2021 – Bewertung der Klimarisiken                     |                                    |                      | VA 2015 – Bedeutung der Klimawirkungen                 |                          |                |
|------------------------------------------------------------|------------------------------------|----------------------|--------------------------------------------------------|--------------------------|----------------|
| Gegenwart                                                  | Mitte des Jahrhunderts (2031-2060) |                      | Gegenwart                                              | Nahe Zukunft (2021-2050) |                |
|                                                            | Optimistischer Fall                | Pessimistischer Fall |                                                        | Schwacher Wandel         | Starker Wandel |
| Hitzebelastung                                             |                                    |                      | Hitzebelastung                                         |                          |                |
| hoch                                                       | mittel                             | hoch                 | hoch                                                   | mittel                   | hoch           |
| Verbreitung und Abundanzveränderung von möglichen Vektoren |                                    |                      | Überträger von Krankheitserregern                      |                          |                |
| gering                                                     | gering                             | mittel               | mittel                                                 | mittel                   | mittel         |
| Atembeschwerden (aufgrund von Luftverunreinigungen)        |                                    |                      | Atembeschwerden durch bodennahes Ozon                  |                          |                |
| mittel                                                     | mittel                             | mittel               | mittel                                                 | mittel                   | hoch           |
| Auswirkungen auf das Gesundheitssystem                     |                                    |                      | Belastung der Rettungsdienste, Krankenhäuser und Ärzte |                          |                |
| mittel                                                     | mittel                             | mittel               | gering                                                 | gering                   | gering         |
| <b>KWRA 2021 – Klimarisiko des Handlungsfeldes</b>         |                                    |                      | <b>VA 2015 – Betroffenheit des Handlungsfeldes</b>     |                          |                |
| <b>Mitte des Jahrhunderts: Pessimistischer Fall</b>        |                                    |                      | <b>Nahe Zukunft: Starker Wandel</b>                    |                          |                |
| hoch                                                       |                                    |                      | mittel bis hoch                                        |                          |                |

Es werden nur die Klimawirkungen dargestellt, die in KWRA 2021 und VA 2015 vergleichbar abgegrenzt wurden.

Die Befunde in den einzelnen Clustern decken sich mit dem, was prinzipiell zu erwarten war. Eine insgesamt etwas ungünstigere Bewertungslage korrespondiert damit, dass die Zeiträume für die Bewertungen der Klimarisiken nun nach hinten verlagert waren. Hinzu kommen ungünstigere Klimaprojektionen als Ausgang der Bewertung. Ein besserer Kenntnisstand und eine geschärfte Wahrnehmung für den Klimawandel werden ebenfalls zu der ungünstigeren Beurteilung beigetragen haben.

Die Mehrheit der Handlungsfelder hat einen Zuwachs des Klimarisikos erfahren. Am deutlichsten ist dieser beim Handlungsfeld „Landwirtschaft“ ausgeprägt, dessen Klimarisiko im pessimistischen Fall zur Mitte des Jahrhunderts zwei Stufen auf der fünfstufigen Skala zur Bewertung der Handlungsfelder höher liegt als seine Betroffenheit 2015.

Bei drei Handlungsfeldern entspricht das Klimarisiko im pessimistischen Fall in der Mitte des Jahrhunderts in der KWRA 2021 der in der VA 2015 ermittelten Betroffenheit. Dies sind die

Handlungsfelder „Biologische Vielfalt“, „Boden“ und „Küsten- und Meeresschutz“. Die Betroffenheit des Handlungsfeldes „Küsten- und Meeresschutz“ wurde bereits 2015 sogar als hoch eingeschätzt – eine Zunahme des Klimarisikos war damit methodisch also gar nicht möglich.

Nur bei drei der 13 in der KWRA 2021 bearbeiteten Handlungsfelder wird die Betroffenheit heute geringer bewertet als 2015. Die drei Handlungsfelder, für die das der Fall ist, sind die drei Handlungsfelder des Clusters Infrastruktur: „Verkehr, Verkehrsinfrastruktur“, „Bauwesen“ und „Energiewirtschaft“.

Betrachtet man die Klimawirkungen im Einzelnen, so hat sich bei etwa knapp der Hälfte eine Verschlechterung ergeben, bei einem knappen Drittel sind die Einschätzungen gleich geblieben und bei etwas über 20 Prozent hat sich die Bewertung verbessert (in der Regel nur wenig).

Sieht man von dem diskutierten Aspekt der Prüfung der Änderung der Relevanz ab und betrachtet das Gesamtbild des Ergebnisses, so ist aus methodischer Sicht hervorzuheben, dass die Ergebnisse der VA 2015 und der KWRA2021 trotz der Unterschiede in der Vorgehensweise kompatible Ergebnisse erbracht haben. Soweit Unterschiede in den Bewertungen bestehen, sind diese in der Regel fachlich gut ableitbar.

#### **Kernaussagen zum Vergleich zwischen VA 2015 und der KWRA 2021**

- ▶ Die Bewertungsprofile der Handlungsfelder und auch der meisten Klimawirkungen der KWRA 2021 ähneln denjenigen der VA 2015. Dies deutet auf die Robustheit der grundsätzlichen Methodik hin.
- ▶ Der Wissenszuwachs zwischen VA 2015 und KWRA 2021 hat eine deutlich ausdifferenziertere Betrachtung der Klimawirkungen ermöglicht, also eine höhere Zahl von analysierten Klimawirkungen.
- ▶ Im Vergleich zwischen VA 2015 und KWRA 2021 hat sich bei knapp der Hälfte der Klimawirkungen und der Handlungsfelder das bewertete Risiko erhöht, bei etwa einem Drittel ist es gleichgeblieben.
- ▶ Gründe für die höhere Bewertung der KWRA 2021 gegenüber der VA 2015 sind vermutlich der weiter in die Zukunft verlagerte Bewertungszeitraum, die ungünstigeren Klimaprojektionen, der bessere Kenntnisstand und die geschärfte Wahrnehmung des Klimawandels.

## 3 Handlungsfeldübergreifende Auswertung

Autoren: Maïke Voß, Walter Kahlenborn, Luise Porst, Sabine Undorf | adelphi, Berlin

### 3.1 Klimatische Einflüsse

Die klimatischen Einflüsse sind eine wichtige Grundlage zur Bestimmung des Klimarisikos. Die folgende Auswertung der klimatischen Einflüsse hat zum Ziel, jene klimatischen Einflüsse zu identifizieren, welche besonders viele Klimawirkungen, Klimawirkungen mit hohen Klimarisiken oder bestimmte Gruppen von Klimawirkungen (zum Beispiel Klimawirkungen mit engem Bezug zur Wirtschaft oder natürlichen Systemen) beeinflussen.

Hierfür wurde für alle bearbeiteten Klimawirkungen (insgesamt 102) in allen Handlungsfeldern bestimmt, welche klimatischen Einflüsse auf diese Klimawirkungen einwirken können. Ein klimatischer Einfluss wurde in der Auswertung mitgezählt, wenn er in dem jeweiligen Berichtskapitel benannt wurde und seine zukünftige Entwicklung sich negativ auf die Klimawirkung auswirken kann. Eine weitere Spezifizierung anhand von Klimaindikatoren fand im Rahmen der Auswertung nicht statt. Wurde eine positive Auswirkung eines klimatischen Einflusses auf eine Klimawirkung festgestellt (zum Beispiel bezogen auf die projizierte Abnahme von Frost- oder Schnee-bezogenen Klimaindikatoren), so floss diese nicht in die Auswertung ein. Zusätzlich zur Auswertung der Berichtskapitel erfolgte ein Abgleich mit den Klimawirkungsketten (UBA 2016). Alle klimatischen Einflüsse wurden im Zuge der Auswertung gleichrangig betrachtet; eine Gewichtung erfolgte nicht. Die Auswertung ermöglicht einen groben Überblick über bestehende klimatische Einflüsse, kann jedoch keinen Anspruch auf Vollständigkeit erheben. So können Klimawirkungen neben den klimatischen Einflüssen auch von vorgelagerten Wirkungen (zum Beispiel Hochwasser oder Meeresspiegelanstieg) beeinflusst werden. Diese wurden in der Operationalisierung teilweise ähnlich wie ein klimatischer Einfluss behandelt, teilweise auch selbst operationalisiert (siehe Teilbericht 1 „Konzept und Methodik“). Aufgrund der unterschiedlichen Spezifizierung wurde daher auf eine Auswertung der vorgelagerten Wirkungen verzichtet und der Fokus auf die klimatischen Einflüsse gelegt.<sup>16</sup>

Abbildung 5 zeigt die Anzahl der in der KWRA 2021 analysierten Klimawirkungen, die jeweils von den aufgeführten klimatischen Einflüssen negativ beeinflusst werden. Die Abbildung macht deutlich, dass eine Gruppe vorrangiger klimatischer Einflüsse existiert. Dabei wirken sich Hitze und Trockenheit auf die meisten Klimawirkungen aus: 61 beziehungsweise 59 von 102 Klimawirkungen werden von diesen beiden Klimatelementen beeinflusst. Danach folgen der durchschnittliche Temperaturanstieg (56 von 102), Starkregen (55 von 102), die durchschnittliche Niederschlagsabnahme (50 von 102) und Starkwind (50 von 102). Für fast die Hälfte aller untersuchten Klimawirkungen wirkt sich somit mindestens einer der sechs genannten klimatischen Einflüsse negativ auf deren zukünftige Entwicklung aus.

Unter diesen sechs klimatischen Einflüssen befinden sich sowohl solche, die sich graduell entwickeln, als auch jene, die sich durch Extremereignisse äußern. Der durchschnittliche Temperaturanstieg und die durchschnittliche Niederschlagsabnahme stellen graduelle klimatische Einflüsse dar. Die hohe Relevanz der beiden Klimatelemente verstärkt sich neben der häufigen Nennung noch dadurch, dass diese ausschlaggebend für viele weitere klimatische Einflüsse sind und sich daher indirekt auf eine Vielzahl von weiteren Klimawirkungen auswirken können. Bedeutende

---

<sup>16</sup> Dies bedeutet auch, dass die klimatischen Einflüsse, welche sich auf vorgelagerte Klimawirkungen beziehen, nicht Teil der Auswertung der betreffenden nachgelagerten Klimawirkungen waren. Wird eine Klimawirkung beispielsweise vom Meeresspiegelanstieg beeinflusst, wurde nicht der diesem zugrundeliegenden Temperaturanstieg gezählt. Eine Auswertung der Verknüpfungen zwischen den (vorgelagerten und nachgelagerten) Klimawirkungen erfolgt in Kapitel 3.4.

klimatische Einflüsse, welche in Form von Extremwetterereignissen auftreten, sind Hitze, Trockenheit, Starkregen und Starkwind. Extremwetterereignisse können vielseitige Schäden in allen Handlungsfeldern verursachen und wirken sich dementsprechend auf viele Klimawirkungen aus.

Vergleichsweise selten wurden Schnee- und Eisdruck, Schneefall, Schneeschmelze, Blitz und UV-Einstrahlung als klimatische Einflüsse der bearbeiteten Klimawirkungen genannt.

**Abbildung 5: Anzahl aller pro klimatischem Einfluss negativ beeinflusster Klimawirkungen**

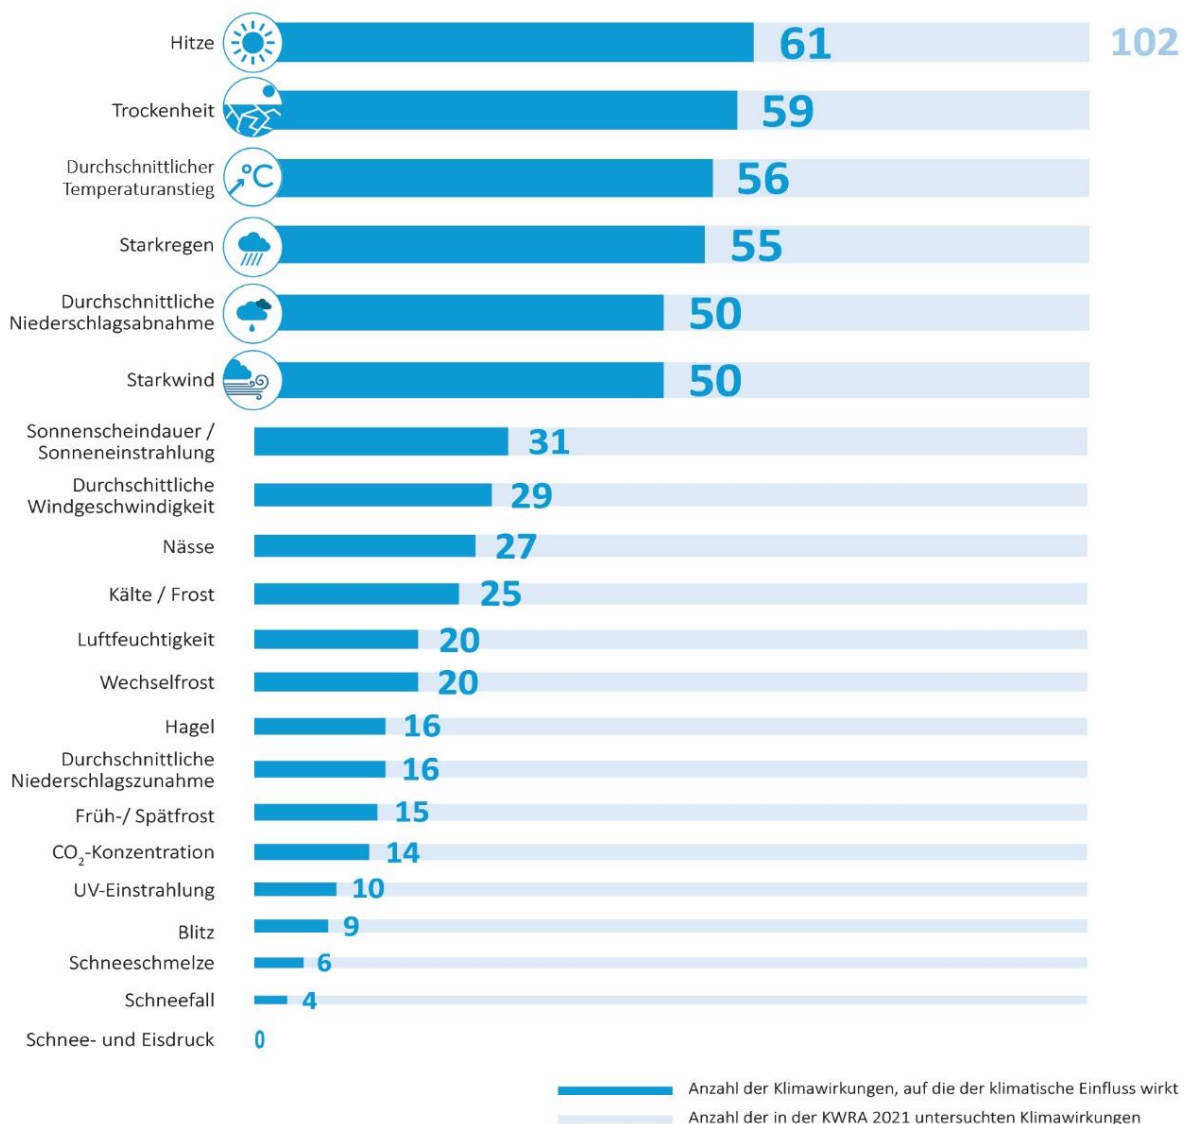

Quelle: eigene Darstellung, adelphi

Unter ausschließlicher Betrachtung der Klimawirkungen, bei denen entweder in der Gegenwart, in der Mitte oder am Ende des Jahrhunderts im pessimistischen Fall ein hohes Klimarisiko bewertet wurde (insgesamt 53 Klimawirkungen), lassen sich nur geringe Änderungen in der Relevanz der bedeutenden klimatischen Einflüsse im Vergleich zur Gesamtmenge aller Klimawirkungen feststellen (Abbildung 6). Dabei bleiben auch die vorab schon genannten sechs relevantesten klimatischen Einflüsse weiter die häufigsten. Es erhöht sich nur die Relevanz der klimatischen Einflüsse im Themenkomplex Dürre/Trockenheit (Trockenheit und durchschnittliche Nie-



derschlagsabnahme). Der klimatische Einfluss „Hitze“ ist auch bei den hoch bewerteten Klimawirkungen sehr relevant. So wurde die Klimawirkung „Hitzebelastung“ im Handlungsfeld „Menschliche Gesundheit“ als einzige Klimawirkung bereits in der Gegenwart mit einem hohen Klimarisiko bewertet. Zudem finden sich bei Indikatoren, die dem klimatischen Einfluss Hitze zuzuordnen sind (zum Beispiel Anzahl Hitzetage, Anzahl Tropennächte, Hitzeperioden mit tropischen Nächten), starke Änderungssignale in zukünftigen Projektionen und damit höhere Risikopotenziale (siehe Teilbericht 1, „Klimaprojektionen“).

**Abbildung 6: Anzahl der hoch bewerteten und pro klimatischem Einfluss negativ beeinflussten Klimawirkungen**

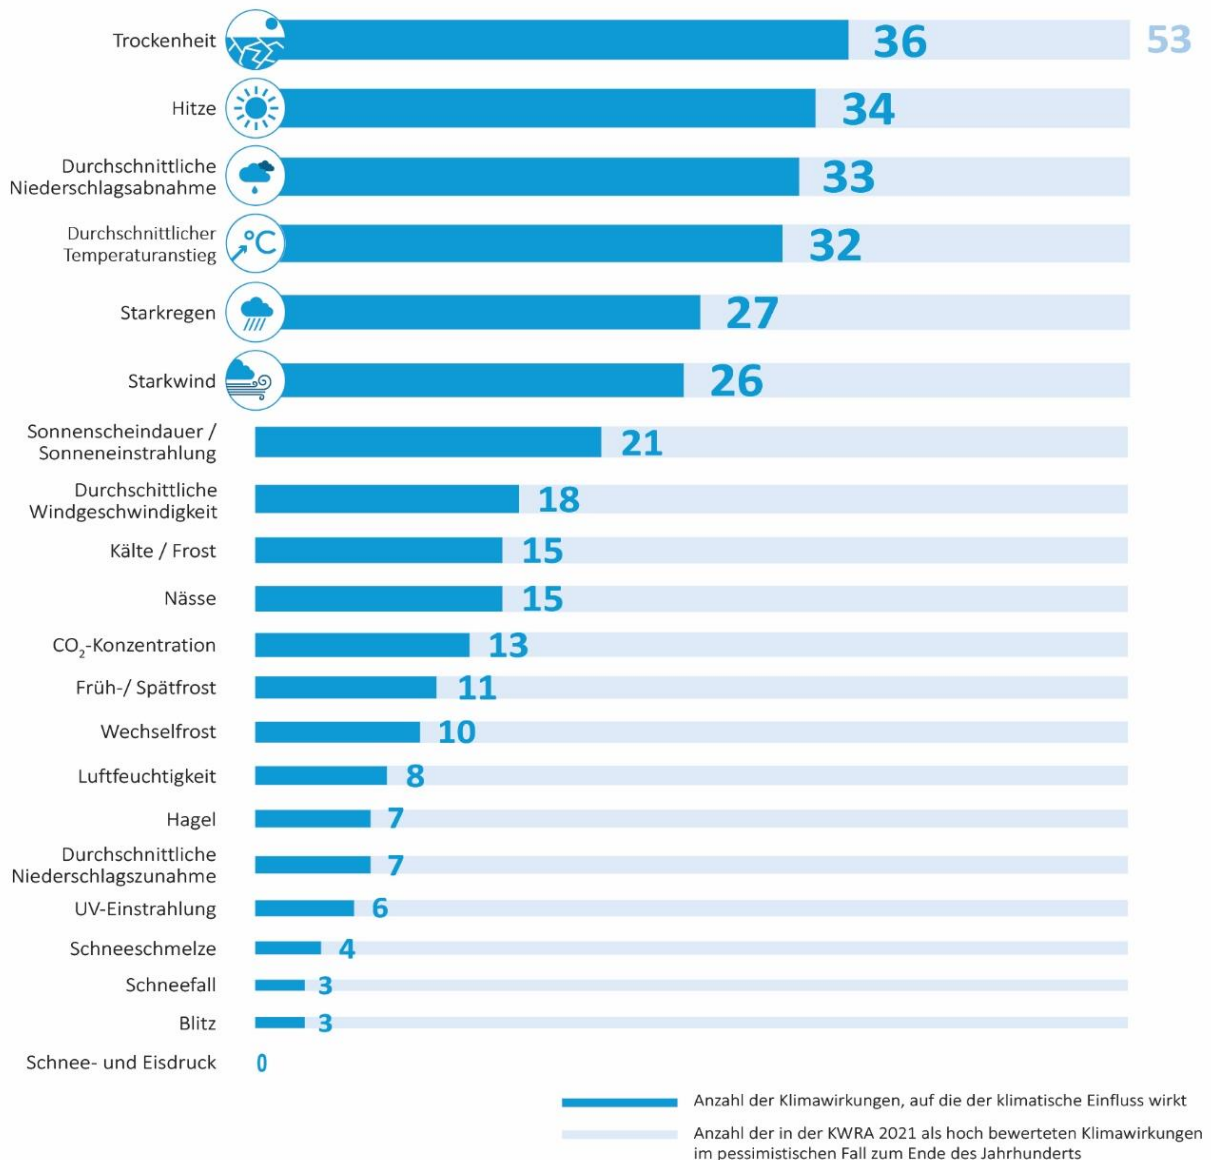

Quelle: eigene Darstellung, adelphi

Neben der generellen Analyse der klimatischen Einflüsse wurde in einer weiteren Auswertung analysiert, wie häufig Klimawirkungen, die jeweils den vier Schutzgütern Mensch, Volkswirtschaft, Umwelt und kulturelles Erbe zugeordnet wurden, von welchen klimatischen Einflüssen beeinflusst sind. Für die 46 Klimawirkungen des Schutzgutes Umwelt scheint Trockenheit ein häufigerer und damit relevanterer klimatischer Einfluss zu sein als in der Gesamtmenge aller 102

Klimawirkungen. Auch für die klimatischen Einflüsse Nässe und Starkregen ergibt sich im Vergleich mit der Gesamtmenge eine etwas höhere Relevanz im Schutzgut Umwelt. Betroffen sind in Bezug auf die Trockenheit insbesondere die Ökosysteme Boden, Wald und Gewässer. Nässe und Starkregen wirken sich vor allem auf den Schädlingsbefall in der Land- und Forstwirtschaft aus. Dadurch können die in den Niederschlags-Projektionen (siehe Teilbericht 1, „Klimaprojektionen“) ausgewiesenen zunehmenden Winterniederschläge, die in bestimmten Regionen tendenziell eher abnehmenden Sommerniederschläge und die vermehrten Trockentage die dem Schutzgut Umwelt zugeordneten Klimawirkungen zukünftig beeinträchtigen. Zusätzlich werden die Klimawirkungen des Schutzgutes Umwelt, von mehr klimatischen Einflüssen als der Durchschnitt aller Klimawirkungen beeinflusst.

Für die 93 Klimawirkungen, die dem Schutzgut Volkswirtschaft zugeordnet wurden, sowie für die 74 Klimawirkungen des Schutzgutes Mensch lassen sich nur geringe Verschiebungen der Häufigkeit von klimatischen Einflüssen im Vergleich zur Gesamtmenge feststellen. Ein Grund dafür könnte die hohe Anzahl und Heterogenität der Klimawirkungen je Schutzgut sein, sodass nur geringe Abweichungen von der Gesamtbetrachtung möglich sind. Hingegen werden die 23 Klimawirkungen, die dem Schutzgut kulturelles Erbe zugeordnet wurden, relativ häufiger durch die klimatischen Einflüsse des durchschnittlichen Temperaturanstiegs, Starkregen und Hitze im Vergleich zur Gesamtbetrachtung beeinflusst. Hierbei handelt es sich vor allem um Klimawirkungen mit Bezug zu Kulturlandschaften (zum Beispiel Vegetation in Siedlungen, landwirtschaftliche Anbaugelände oder Küstenökosysteme wie das Wattenmeer).

Betrachtet man die betroffenen Systeme, so fällt auf, dass bezogen auf die natürlichen Systeme und Ressourcen sehr viele (absolut und relativ) Klimawirkungen von einem graduellen Temperaturanstieg, aber auch von Trockenheit, Starkregen und Starkwind betroffen sind. Auch bei den naturnutzenden Wirtschaftssystemen sind Trockenheit, häufig verbunden mit Hitze, und ebenfalls der graduelle Temperaturanstieg die Hauptgefahren. Infrastruktursysteme und Gebäude werden vor allem von Starkregenereignissen in Verbindung mit Überschwemmungen, aber auch von einem graduellen Temperaturanstieg bedroht. Letzter verursacht auf globaler Ebene den Meeresspiegelanstieg, der an den Küsten ein auslösender Faktor von Schäden an Infrastrukturen und Gebäuden sein kann. Menschen und soziale Systeme leiden besonders unter Hitze und dem graduellen Temperaturanstieg, der viele Naturgefahren und Krankheitsquellen verstärkt.

In der VA 2015 erfolgte ebenfalls eine Auswertung der klimatischen Einflüsse als Teil der integrierten Betrachtung (Buth et al. 2015). Da die Vulnerabilitätsanalyse 2015 jedoch nicht exakt dieselben Klimawirkungen und eine geringere Gesamtanzahl betrachtet hat, ist ein quantitativer Vergleich der beiden Analysen der klimatischen Einflüsse nur schwer möglich. Zudem wurden in der VA 2015 neben klimatischen Einflüssen auch vorgelagerte Wirkungen in die Auswertung miteinbezogen. Dennoch ist festzustellen, dass die ersten fünf der sechs bedeutendsten klimatischen Einflüsse der Analyse aus 2015 auch in der KWRA 2021 als relevanteste Einflüsse ermittelt wurden. Bei der sechst-häufigsten Nennung handelte es sich um die vorgelagerte Klimawirkung „Flusshochwasser“, welche nicht Bestandteil der aktuellen Auswertung war.<sup>17</sup> Die übrigen fünf klimatischen Einflüsse sind, geordnet nach Häufigkeit der Nennung in der VA 2015: Temperatur, Niederschlag, Hitze, Trockenheit und Starkwind. Innerhalb dieser Gruppe hat sich in der KWRA 2021 im Vergleich zur VA 2015 die Bedeutung von Hitze und Trockenheit erhöht, was mit der Trockenheitserfahrung der letzten Jahre zusammenhängen kann. Eine leicht geringere Relevanz weist in der KWRA 2021 der Niederschlag auf, welcher in der Vulnerabilitätsanalyse 2015 noch als zweitbedeutendster Klimaparameter genannt wurde. Dabei wurde jedoch seiner-

---

<sup>17</sup> In der Analyse der Querverbindungen wurde die Klimawirkung „Hochwasser“ jedoch als zentrale Klimawirkung herausgestellt, die viele Klimawirkungen anderer Handlungsfelder beeinflusst (siehe 3.4).

zeit nicht zwischen Niederschlagsabnahme und -zunahme unterschieden. Weiterhin wird ersichtlich, dass Starkregen bei der KWRA 2021 als klimatischer Einfluss an Relevanz gewonnen hat. In der VA 2015 wurde Starkregen nur für vergleichsweise wenige Klimawirkungen als klimatischer Einfluss aufgeführt. Jedoch wurde in der damaligen Auswertung der klimatischen Einflüsse auch separat noch die vorgelagerte Wirkung Sturzfluten betrachtet, welche eng mit Starkregen verknüpft ist. Deutlich weniger relevant in der aktuellen Auswertung ist der Schneefall, welcher in der VA 2015 noch an neunter Stelle der bedeutendsten klimatischen Einflüsse aufgeführt wurde.

#### Kernaussagen der klimatischen Einflüsse mit besonderer Bedeutung

- ▶ Die sechs klimatischen Einflüsse durchschnittlicher Temperaturanstieg, Hitze, Trockenheit, Starkregen, durchschnittliche Niederschlagsabnahme und Starkwind beeinflussen einen Großteil der 102 untersuchten Klimawirkungen.
- ▶ Diese Identifikation der vorrangigen klimatischen Einflüsse scheint robust, da sie sich auch bei Betrachtung verschiedener Teilaspekte wie Klimawirkungen mit hohen Klimarisiken oder Schutzgütern nicht ändern. Bei der Betrachtung der hohen Klimarisiken zeigt sich eine höhere Relevanz der klimatischen Einflüsse Trockenheit und durchschnittliche Niederschlagsabnahme im Vergleich zur Betrachtung der Gesamtmenge aller Klimawirkungen.
- ▶ Klimawirkungen im Schutzgut Umwelt werden besonders häufig durch Trockenheit beeinflusst. Sie sind zudem überdurchschnittlich vielen klimatischen Einflüssen ausgesetzt und damit vielfach durch den Klimawandel betroffen.
- ▶ Die Ergebnisse der Auswertung zeigen, dass sich graduell verändernde Klimaelemente, wie der Temperaturanstieg, genauso relevant für Klimawirkungen sind wie solche, die Extremereignisse abbilden.

### 3.2 Sensitivitätsfaktoren im Quervergleich

Neben den klimatischen Einflüssen sind Sensitivitätsfaktoren, wie etwa die Nutzungsintensität von Böden, der Versiegelungsgrad, die Artenzusammensetzung in Ökosystemen oder sozio-demographische Strukturen, in der Regel die wichtigste Komponente für die Ausprägung von Klimawirkungen. In einem Quervergleich wird im Folgenden der Frage nachgegangen, welche Sensitivitätsfaktoren oder Gruppen von Sensitivitätsfaktoren besonders relevant sind und was sich aus der Betrachtung von Sensitivitätsfaktoren für die Anpassung an den Klimawandel ableiten lässt.

Zur Analyse der Sensitivitätsfaktoren wurden für jede der bearbeiteten Klimawirkungen die relevanten Sensitivitätsfaktoren bestimmt und diese in einer Kreuztabelle zusammengefasst. Um Aussagen zu Häufigkeiten von Sensitivitätsfaktoren zu treffen, wurden jene zusammengefasst, die inhaltlich sehr ähnlich waren. Diese Zuordnung erwies sich in der Praxis mitunter als kompliziert, weil hinsichtlich der Sensitivitätsfaktoren überwiegend Unterschiede zwischen den Klimawirkungen festzustellen waren. Da nur sehr wenige klar abgrenzbare Gruppen identifizierbar waren, wird im Folgenden auch auf die Ausweisung von statistischen Angaben verzichtet. Bei der Datenanalyse wurde in Zweifelsfällen grundsätzlich eher getrennt statt zusammengruppiert.

Um spezifische Thesen zu testen, wurden die Sensitivitätsfaktoren nach Kategorien gruppiert und ausgewertet. Wie für die klimatischen Einflüsse erfolgte auch diese Betrachtung über Hand-

lungsfelder hinweg. Alle Sensitivitätsfaktoren wurden in der Auswertung gleichrangig betrachtet, insbesondere wurde nicht nach ihrer relativen Bedeutung für die jeweiligen Klimawirkungen unterschieden.

Die Auswertung ergab eine sehr hohe Zahl an Sensitivitätsfaktoren (weit über 200). Insgesamt ist das Profil der Sensitivitätsfaktoren wesentlich flacher und breiter als das der klimatischen Einflussfaktoren, das heißt es gibt sehr viele verschiedene und nur wenige häufiger auftretende Sensitivitätsfaktoren.

Ein Sensitivitätsfaktor, der deutlich gehäuft auftritt, ist die Art und Intensität der Landnutzung. Dies spielt in fünf Handlungsfeldern („Küsten- und Meeresschutz“, „Boden“, „Biologische Vielfalt“, „Wasserhaushalt, Wasserwirtschaft“ sowie „Bauwesen“) eine Rolle. Die hiermit eng in Zusammenhang stehenden Sensitivitätsfaktoren Vegetationsbedeckung beziehungsweise Bodenbedeckung wurden vier- beziehungsweise dreimal aufgeführt (in den Handlungsfeldern „Boden“ und „Bauwesen“ beziehungsweise „Boden“ und „Verkehr, Verkehrsinfrastruktur“). Der Versiegelungsgrad ist in dem Kontext auch zu nennen, er taucht in fünf Klimawirkungen als Einflussgröße auf, davon dreimal im Handlungsfeld „Bauwesen“ und zweimal im Handlungsfeld „Wasserwirtschaft, Wasserhaushalt“.

Eine besondere Bedeutung hat die Art und Intensität der Bodenbewirtschaftung, was sich allerdings zergliedert in Aspekte wie Fruchtwahl, Fruchtfolgen oder Anbaumethoden. Neben den Handlungsfeldern „Boden“ und „Landwirtschaft“ kommen diese Aspekte auch im Handlungsfeld „Wasserhaushalt, Wasserwirtschaft“ zum Tragen.

Die Bodenart selbst ist für sehr viele Klimawirkungen und Handlungsfelder relevant (zum Beispiel „Boden“, „Biologische Vielfalt“, „Verkehr, Verkehrsinfrastruktur“), aber natürlich schwer beeinflussbar. Eher beeinflussbar ist die Baumartenzusammensetzung, die in der Forstwirtschaft und auch im Handlungsfeld „Menschliche Gesundheit“ (für allergische Reaktionen durch Aeroallergene) von Relevanz ist.

Wasserverfügbarkeit ist neben der Landnutzung der andere Sensitivitätsfaktor, der am häufigsten auftritt. Neben der Landwirtschaft und der Fischerei sind hier auch die Energiewirtschaft sowie die Handlungsfelder „Boden“, „Biologische Vielfalt“ und natürlich „Wasserwirtschaft, Wasserhaushalt“ angesprochen. Andere, damit eng verbundene Sensitivitätsfaktoren sind die Wasserspeicherkapazität, die in den Handlungsfeldern „Boden“, „Biologische Vielfalt“, „Bauwesen“ und „Wald- und Forstwirtschaft“ relevant ist, wie auch die Frage der Wasserentnahme, die wiederum in den Handlungsfeldern „Energiewirtschaft“, „Bauwesen“ und „Wasserwirtschaft, Wasserhaushalt“ als Sensitivitätsfaktor vorkommt.

Neben den genannten ist ein weiterer, häufiger auftretender Sensitivitätsfaktor die Luftverschmutzung relevant für Klimawirkungen in den industrienahen Feldern („Energiewirtschaft“, „Industrie und Gewerbe“ sowie „Bauwesen“) sowie für die menschliche Gesundheit.

Schadstoffeinträge in natürliche Systeme sind wichtig für die Handlungsfelder „Biologische Vielfalt“, „Wald- und Forstwirtschaft“, „Fischerei“, „Wasserhaushalt, Wasserwirtschaft“ sowie „Küsten- und Meeresschutz“. Allerdings gilt hier, dass bei ausdifferenzierter Betrachtung unterschiedliche Aspekte in Kontext der jeweiligen Klimawirkung eine Rolle spielen.

Durch das Auftreten in diversen Klimawirkungsketten und in verschiedenen Handlungsfeldern weisen die erwähnten Sensitivitätsfaktoren eine wichtige Rolle für die Anpassungsplanung auf. Das wiederholte Auftreten des Sensitivitätsfaktors Landnutzung verweist zum Beispiel darauf, dass alle diesbezüglichen Regelungen (Raumplanung, Flächennutzungsplanung und weitere)

zentral für Anpassungserfolge sein werden. Für die Handlungsfelder „Küsten- und Meereschutz“ sowie „Fischerei“ sind es ebenfalls Nutzungsaspekte (Schiffsverkehr, Fischereirechte, Stoffeinträge), die neben einer Vielzahl natürlicher, nur schwierig beeinflussbarer Sensitivitätsfaktoren auftreten. Auch Regelungen zur Wassernutzung werden angesichts des gehäuftem Auftretens entsprechender Sensitivitätsfaktoren eine große Rolle spielen. Darüber hinaus gibt es Klimawirkungen, für die sowohl Gewässer- als auch Landnutzung Sensitivitätsfaktoren sind, so dass die Einbeziehung von Querbezügen zwischen Land- und Wassernutzung hilfreich sein wird.

Neben den häufiger auftretenden Sensitivitätsfaktoren gibt es sehr viele Faktoren, die in hohem Maße kontextabhängig sind, das heißt nur für ein einzelnes Handlungsfeld oder – in aller Regel – sogar nur für eine einzelne Klimawirkung relevant sind. Bei der Anpassungsplanung muss daher oftmals zwingend an eine Vielzahl verschiedener Sensitivitätsfaktoren angeknüpft werden.

In der Gesamtschau aller Sensitivitätsfaktoren betreffen eindeutig die meisten die Nutzung und Beanspruchung natürlicher Ressourcen, insbesondere Wasser und Land (Boden). Dies gilt gleichermaßen für die Gesamtmenge der Sensitivitätsfaktoren aller Klimawirkungen wie für die Teilmenge der Faktoren, die Klimawirkungen mit höherem Klimarisiko betreffen (siehe 2.1), und für die Teilmenge der Faktoren, die mehrfach und in verschiedenen Handlungsfeldern auftreten. Daraus folgt, dass mit Blick auf die Anpassung an den Klimawandel ein verstärkter Schutz natürlicher Ressourcen vor anthropogener Überbeanspruchung/Übernutzung zentral sein wird.

Sozioökonomische und demographische Aspekte spielen als direkte Sensitivitätsfaktoren nur eine untergeordnete Rolle. Sie fließen zum Teil bei den anthropogen geprägten Systemen (Tourismus und vor allem Gesundheit) direkt in Klimawirkungsketten mit ein. Indirekt nehmen sie offenkundig Einfluss auf andere Sensitivitätsfaktoren wie die Land- und Ressourcennutzung und sie spielen damit eine größere Rolle, als es auf den ersten Blick erscheint. Gleichzeitig kann aber davon ausgegangen werden, dass andere Aspekte, vor allem Fragen des Bewirtschaftungsregimes natürlicher Ressourcen über einfache sozioökonomische und demographische Sensitivitätsfaktoren auch unter dem Gesichtspunkt eines indirekten Einflusses dominieren.

Ein Vergleich mit der VA 2015 ist nicht möglich, da dort keine handlungsfeldübergreifende Auswertung der Sensitivitätsfaktoren stattfand. Die damalige Auswertung konzentrierte sich darauf, internationale Einflüsse auf die Sensitivitäten zu betrachten, wozu auf einige wenige Klimawirkungen fokussiert wurde.

#### **Kernaussagen des narrativen Vergleichs der Sensitivitäten und der räumlichen Exposition**

- ▶ Die Sensitivität der vom Klimawandel betroffenen Systeme ist sehr heterogen und abhängig von dem System selber sowie von dem klimatischen Einfluss. Es gibt daher eine hohe Zahl verschiedener Sensitivitätsfaktoren.
- ▶ Bestimmte Sensitivitätsfaktoren, insbesondere solche, die der Land- und Wassernutzung zuzuordnen sind, treten häufiger in einigen Handlungsfeldern auf. Sie werden für den Erfolg von Anpassung an den Klimawandel eine größere Rolle spielen. Handlungsfeldübergreifende Ansätze sind hier potenziell bedeutsam.
- ▶ Die meisten Sensitivitätsfaktoren betreffen die Nutzung und Beanspruchung natürlicher Ressourcen, insbesondere Wasser und Landfläche. Mit Blick auf die Anpassung an den Klimawandel ist damit ein verstärkter Schutz natürlicher Ressourcen vor anthropogener Überbeanspruchung/ Übernutzung zentral.



### 3.3 Handlungsfeldübergreifende Auswertung der Gewissheit

Die handlungsfeldübergreifende Auswertung der Gewissheit hat zum Ziel, Klimawirkungen und Handlungsfelder mit besonders hoher oder geringer Gewissheit herauszustellen sowie Änderungen der Gewissheiten zwischen den betrachteten Zeitscheiben hervorzuheben. Dies ermöglicht es, Klimawirkungen und Handlungsfelder aufzuzeigen, in denen aufgrund von geringen Gewissheiten noch weiterführender Forschungsbedarf besteht (siehe auch Kapitel 7), oder bei denen die ermittelten Klimarisiken noch hohen Unsicherheiten unterliegen und daher vorsichtig interpretiert werden sollten. Gleichzeitig können auf diese Weise auch verbesserte Aussagen zu möglichen Handlungserfordernissen getroffen werden (siehe Kapitel 6).

Die Auswertung erfolgt auf Basis der im Rahmen der Bewertung der Klimarisiken angegebenen Gewissheit der Bewertungen. Die Gewissheit wurde für alle Klimawirkungen für die beiden Zeitscheiben Mitte des Jahrhunderts (2031 bis 2060) und Ende des Jahrhunderts (2071 bis 2100) bestimmt. Der Wertebereich umfasste eine vierstufige Skala von „sehr gering“, „gering“, „mittel“ und „hoch“. Die Bewertung der Gewissheit wurde auf Basis folgender Teilaspekte getroffen: Vorhandensein von Daten, die Zuverlässigkeit der verwendeten Daten, Kenntnisse über Wirkzusammenhänge, Genauigkeit und Plausibilität von Modellannahmen, die Eindeutigkeit von Trends.

Betrachtet man die durchschnittliche Gewissheit der Bewertungen aller Klimawirkungen für die beiden Zeitscheiben, so liegt die gemittelte Gewissheit der Bewertungen für die Mitte des Jahrhunderts bei einem Wert von 2,7<sup>18</sup> (Grad der Gewissheit: mittel) und für das Ende des Jahrhunderts bei 2,2 (Grad der Gewissheit: gering). Insgesamt scheint die Erkenntnislage für die nahe Zukunft somit vergleichsweise gut zu sein; dennoch sind auch hier noch Unsicherheiten bezogen auf die Datengrundlagen, die betrachteten Wirkzusammenhänge und die Plausibilität der Modellannahmen erkennbar.

Betrachtet man die Gewissheiten der Bewertung einzelner Klimarisiken wurde für die Mitte des Jahrhunderts bei den Klimawirkungen „Bodenbiologie: Mikrobiologische Aktivität/Biodiversität/biologische Funktionalität“ im Handlungsfeld „Boden“ sowie „Ökosystemleistungen“ im Handlungsfeld „Biologische Vielfalt“ eine sehr geringe Gewissheit angegeben. Diese Klimawirkungen adressieren eine hohe Anzahl an Teilsystemen mit komplexen Wirkzusammenhängen. Zum Ende des Jahrhunderts steigt die Anzahl an Klimawirkungen, deren Klimarisiko nur mit einer Gewissheit von sehr gering bewertet wurden, auf sieben; darunter befinden sich neben den bereits genannten Klimawirkungen jeweils zwei Klimawirkungen aus den Handlungsfeldern „Fischerei“ („Entkopplung von Nahrungsbeziehungen in der Ostsee“ und „Stress durch Schädlinge/Krankheiten“) und „Menschliche Gesundheit“ („UV-bedingte Gesundheitsschädigungen“ und „Auswirkungen auf das Gesundheitssystem“) sowie die Klimawirkung „Verlust der genetischen Vielfalt“ aus dem Handlungsfeld „Biologische Vielfalt“. Die hohe Ungewissheit könnte dadurch bedingt sein, dass die genannten Klimawirkungen komplexe Systeme betreffen und vergleichsweise gering erforscht sind.

Bei zwei Klimawirkungen in den Handlungsfeldern „Küsten- und Meeresschutz“ („Meerestemperatur und Eisbedeckung“) und „Bauwesen“ („Vegetation in Siedlungen“) sind die zugrundeliegenden Wirkzusammenhänge und klimatischen Einflüsse bereits heute weitgehend gut untersucht, sodass die Bewertung der Klimarisiken mit vergleichsweise hoher Gewissheit für Mitte des Jahrhunderts und auch bis zum Ende des Jahrhunderts getroffen werden können. Weitere Klimawirkungen, die mit einer vergleichsweise hohen Gewissheit (gemittelter Wert der Ge-

---

<sup>18</sup> Zur Ermittlung der durchschnittlichen Gewissheiten wurde der Wertebereich numerisch dargestellt (1=sehr gering, 2=gering, 3=mittel, 4=hoch). Die ermittelten Werte stellen daher eine künstliche Spezifizierung der Gewissheiten dar. Der eigentliche Grad der Gewissheit wird daher zusätzlich aufgeführt.



wissheit von 3,5 über beide Zeitscheiben) bewertet wurden, sind die „Verschiebung von Anbaugebieten“, „Agrophänologische Phasen und Wachstumsperiode“, „Qualität der Ernteprodukte“ (alle drei im Handlungsfeld „Landwirtschaft“), „Meeresspiegelhöhe“ (Handlungsfeld „Küsten- und Meeresschutz“), „Hitzebelastung“ und „Potenziell schädliche Mikroorganismen und Algen“ (beide Handlungsfeld „Menschliche Gesundheit“).

Vergleicht man die durchschnittlichen Gewissheiten der Bewertungen in den fünf Clustern sowie in den Handlungsfeldern, so weisen die Cluster Wasser, Land und Wirtschaft niedrigere Gewissheiten als die anderen Cluster auf. Bei den ersten beiden Clustern gilt dies insbesondere für den Zeitraum Ende des Jahrhunderts (Tabelle 17). Die Klimarisiken der Handlungsfelder „Boden“ und „Wasserhaushalt, Wasserwirtschaft“ wurden beispielsweise im Schnitt über beide Zeitscheiben (Durchschnittswert der Gewissheiten Mitte und Ende des Jahrhunderts) mit der geringsten Gewissheit bewertet. Dies könnte dadurch bedingt sein, dass viele Klimawirkungen dieser Handlungsfelder viele Einflussfaktoren und komplexe, teils sehr dynamische Wirkzusammenhänge aufweisen, wodurch hohe Unsicherheiten in der Bewertung der Klimarisiken bestehen. In solchen Fällen besteht somit auch ein verstärkter Forschungsbedarf. Wenn auch wenig verstandene und modellierbare Einflussfaktoren wie beispielsweise sozioökonomische Faktoren von hoher Relevanz für ein Klimarisiko sind, kann dies zusätzlich zu höheren Unsicherheiten und damit zu geringeren Gewissheiten in der Einschätzung führen. Auch die vergleichsweise niedrigen Gewissheiten der Bewertungen im Handlungsfeld „Industrie und Gewerbe“ (Cluster Wirtschaft) könnten dadurch bedingt sein.

Im Handlungsfeld „Energiewirtschaft“ liegt in beiden Zeitscheiben eine geringe Gewissheit (mit einem gemittelten Wert von 2,3) vor. Hier bildet sich ab, dass die im Rahmen der Energiewende zu erwartende Transformation des Energiesystems ein wichtiger Einflussfaktor für das Handlungsfeld ist, welcher gleichzeitig aufgrund des starken Wandels nur eine eingeschränkte Ableitung von Trends ermöglicht.

Hohe Gewissheiten (gemittelt über beide Zeitscheiben) finden sich dagegen in den Bewertungen der Handlungsfelder „Menschliche Gesundheit“, „Bauwesen“ und „Landwirtschaft“. In den Handlungsfeldern „Landwirtschaft“ und „Bauwesen“ bleibt auch für das Ende des Jahrhunderts die durchschnittliche Gewissheit der Bewertung vergleichsweise hoch (Grad der Gewissheit: mittel). Dies spricht dafür, dass bezüglich der in den Handlungsfeldern bearbeiteten Klimawirkungen bereits ein vergleichsweise guter Kenntnisstand hinsichtlich möglicher Klimafolgen vorliegt. Im Handlungsfeld „Menschliche Gesundheit“ nimmt dagegen die Sicherheit bei der Bewertung zum Ende des Jahrhunderts im Vergleich zur Mitte des Jahrhunderts stark ab. Eine ähnliche Entwicklung findet sich im Handlungsfeld „Fischerei“, bei welchem die Sicherheit bei der Bewertung nur für die Mitte des Jahrhunderts relativ hoch ist. Große Unsicherheiten bestehen jedoch auch hier für die Entwicklungen zum Ende des Jahrhunderts, da die langfristige Reaktion des betroffenen Ökosystems auf die zu erwartenden Klimafolgen nicht absehbar ist und sich in unterschiedliche Richtungen entwickeln kann. Die eingeschätzten Klimarisiken im Handlungsfeld „Fischerei“ für das Ende des Jahrhunderts unterliegen somit hohen Unsicherheiten.

**Tabelle 17: Durchschnittliche Gewissheiten und Grad der Gewissheit der Bewertungen aller bearbeiteten Klimawirkungen und der jeweiligen Klimawirkungen pro Handlungsfeld für die Zeiträume Mitte und Ende des Jahrhunderts (Reihenfolge nach aufsteigender Gewissheit)**

1=sehr gering, 2=gering, 3=mittel, 4=hoch

| Mitte des Jahrhunderts                 |              | Ende des Jahrhunderts                  |              |
|----------------------------------------|--------------|----------------------------------------|--------------|
| Boden                                  | 2,1 (gering) | Fischerei                              | 1,6 (gering) |
| Wasserhaushalt, Wasserwirtschaft       | 2,3 (gering) | Boden                                  | 1,9 (gering) |
| Energiewirtschaft                      | 2,3 (gering) | Verkehr, Verkehrsinfrastruktur         | 2,0 (gering) |
| Industrie und Gewerbe                  | 2,4 (gering) | Wasserhaushalt, Wasserwirtschaft       | 2,1 (gering) |
| Tourismuswirtschaft                    | 2,6 (mittel) | Menschliche Gesundheit                 | 2,1 (gering) |
| Durchschnittswert aller Klimawirkungen | 2,7 (mittel) | Biologische Vielfalt                   | 2,1 (gering) |
| Biologische Vielfalt                   | 2,8 (mittel) | Durchschnittswert aller Klimawirkungen | 2,2 (gering) |
| Küsten- und Meeresschutz               | 2,8 (mittel) | Wald- und Forstwirtschaft              | 2,2 (gering) |
| Verkehr, Verkehrsinfrastruktur         | 2,9 (mittel) | Tourismuswirtschaft                    | 2,2 (gering) |
| Wald- und Forstwirtschaft              | 3,0 (mittel) | Energiewirtschaft                      | 2,3 (gering) |
| Bauwesen                               | 3,2 (mittel) | Industrie und Gewerbe                  | 2,3 (gering) |
| Landwirtschaft                         | 3,3 (mittel) | Küsten- und Meeresschutz               | 2,4 (gering) |
| Menschliche Gesundheit                 | 3,4 (mittel) | Landwirtschaft                         | 2,7 (mittel) |
| Fischerei                              | 3,4 (mittel) | Bauwesen                               | 2,8 (mittel) |

Bei Betrachtung der Gewissheiten der Bewertungen der Klimawirkungen mit hohem Klimarisiko wird deutlich, dass diese in der Zukunft für beide Fälle meist eine etwas höhere Gewissheit aufweisen, als die Klimawirkungen mit mittleren oder geringem Klimarisiko (Abbildung 7). Für die hohen Klimarisiken scheint somit ein etwas besserer Kenntnisstand vorzuliegen. Lediglich für das Ende des Jahrhunderts und für den pessimistischen Fall, das heißt bei den stärksten Änderungssignalen, zeigen die geringen Klimarisiken eine leicht höhere Gewissheit.<sup>19</sup>

<sup>19</sup> Hier kann jedoch auch die Größe des Samples einen Einfluss haben. Für das Ende des Jahrhunderts zeigen im pessimistischen Fall nur noch neun Klimawirkungen ein geringes Klimarisiko auf – verglichen mit 53 Klimawirkungen mit einem hohen Klimarisiko.

**Abbildung 7: Gemittelte Gewissheiten der Bewertungen der Klimawirkungen mit hohem, mittleren und geringen Klimarisiko für die Mitte und das Ende des Jahrhunderts (jeweils optimistischer und pessimistischer Fall)**

1=sehr gering, 2=gering, 3=mittel, 4=hoch

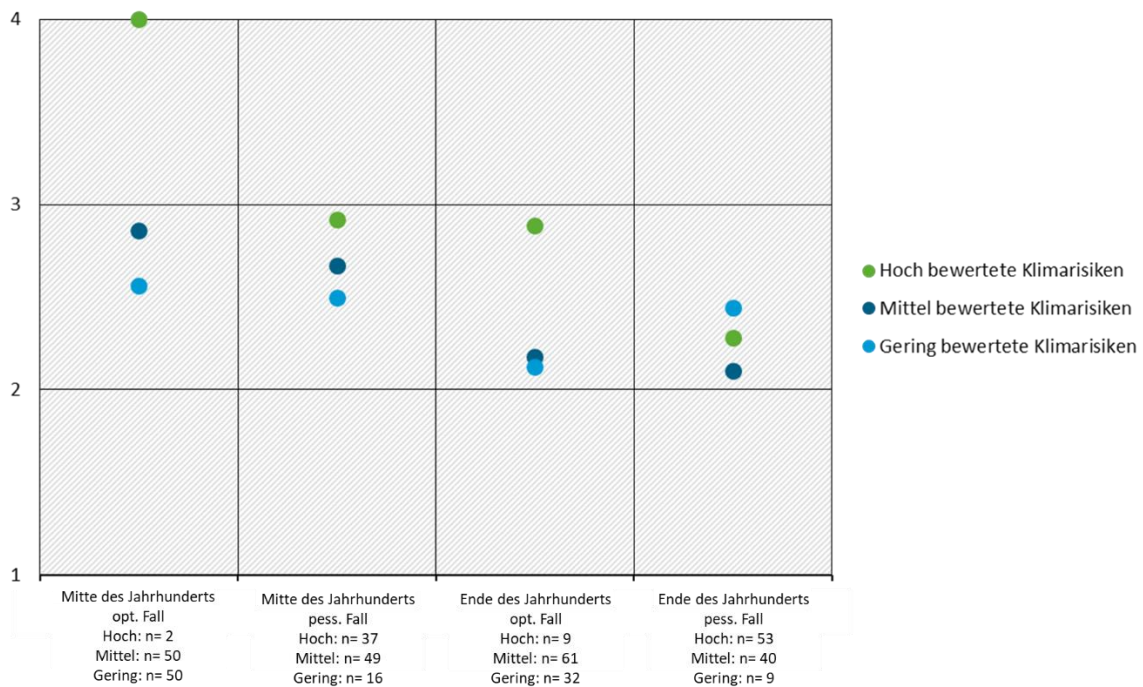

Quelle: eigene Darstellung, adelphi

In welchem Teilaspekt der Gewissheit die Unsicherheiten bei den einzelnen Klimawirkungen jeweils begründet sind, ist methodisch bedingt aus der Auswertung nicht ersichtlich. Für zukünftige KWRAs kann eine detailliertere Aufschlüsselung der Gewissheit, beziehungsweise eine direkte Bewertung der Teilaspekte der Gewissheit, empfehlenswert sein, um zukünftig noch passgenauer Hinweise auf mögliche Wissenslücken geben zu können.

### Kernaussagen der handlungsfeldübergreifenden Auswertung der Gewissheit

- ▶ Der durchschnittliche Grad der Gewissheit der Bewertung der Klimarisiken liegt, bezogen auf den Zeitraum „Mitte des Jahrhunderts“, bei mittel und bezogen auf den Zeitraum „Ende des Jahrhunderts“ bei gering. Die Bewertungen der Klimarisiken erscheinen somit für die nahe Zukunft robuster, wobei auch hier Unsicherheiten vorliegen.
- ▶ Sehr geringe bis geringe Gewissheiten bei der Bewertung finden sich größtenteils bei Klimarisiken mit komplexen Wirkzusammenhängen und/oder einer hohen Anzahl an sozioökonomischen Einflussfaktoren. Hier besteht insbesondere weiterer Forschungsbedarf.
- ▶ Klimarisiken der Handlungsfelder „Boden“ und „Wasserhaushalt, Wasserwirtschaft“ weisen im Durchschnitt vergleichsweise geringe Gewissheiten auf, da sie oft durch viele Einflussfaktoren und komplexe, teils sehr dynamische Wirkzusammenhänge geprägt sind. Dies erhöht die Unsicherheiten in den Einschätzungen der Klimarisiken in diesen Handlungsfeldern.
- ▶ Hohe Gewissheiten bestehen bei den Bewertungen der Klimarisiken der Handlungsfelder „Landwirtschaft“ und „Bauwesen“, weil bei diesen vermutlich schon ein vergleichsweise guter Kenntnisstand hinsichtlich möglicher Klimafolgen vorliegt.

- Klimawirkungen mit hoch bewerteten Klimarisiko weisen tendenziell eine höhere Gewissheit bei der Bewertung auf. Dies deutet, insbesondere für die Mitte des Jahrhunderts, auf eine solide Kenntnislage als Grundlage für mögliche Anpassung hin.

### 3.4 Analyse der Querverbindungen

Die im Rahmen der KWRA 2021 betrachteten Klimawirkungen und Handlungsfelder sind durch vielfältige Wechselwirkungen miteinander verknüpft. Entstehen durch die Folgen des Klimawandels negative Auswirkungen für eine Klimawirkung, so wirkt sich dies oft indirekt auch auf weitere nachgelagerte Klimawirkungen aus. Ein Beispiel soll anhand der Klimawirkung „Wassermangel im Boden“ gegeben werden: Ein verstärkter „Wassermangel im Boden“ (Handlungsfeld „Boden“) kann zu trockenheitsbedingten „Schäden in Wäldern“ (Handlungsfeld „Biologische Vielfalt“) führen. Diese können sich dann auf die Nutzfunktionen des Waldes, „Holzertrag“ und „Erholung“ (beides Handlungsfeld „Wald- und Forstwirtschaft“) auswirken.

Das aufgeführte Beispiel zeigt eine Wirkbeziehung von einer Klimawirkung zu einer anderen auf. Zusätzlich zu diesen in eine Richtung führenden Wirkungen sind auch gegenseitige Wechselwirkungen möglich. So kann beispielsweise die steigende Gewässertemperatur in Fließgewässern (Klimawirkung „Gewässertemperatur und Eisbedeckung und biologische Wasserqualität“) zu Einschränkungen bei der Entnahme und Einleitung von Kühlwasser führen (Klimawirkung „Mangelndes Kühlwasser für thermische Kraftwerke“). Wird Wasser jedoch zu Kühlzwecken von thermischen Kraftwerken in das Gewässer eingeleitet oder entnommen, kann dies auch zur Erhöhung der Gewässertemperatur beitragen.

Anhand der Auswertung der Querverbindungen lässt sich aufzeigen, welche Klimawirkungen und aggregiert auch Handlungsfelder sich auf besonders viele andere Klimawirkungen beziehungsweise Handlungsfelder auswirken oder welche andersherum von besonders vielen beeinflusst werden. Auch können Klimawirkungen mit zentraler Bedeutung (also einer hohen Anzahl an ausgehenden Wirkungen) identifiziert werden.

Bereits in der VA 2015 wurde eine Auswertung der Querverbindungen durchgeführt. Ausgehend von den damaligen Vorarbeiten wurden in der KWRA 2021 die Querbezüge zwischen einzelnen Klimawirkungen schon in der Ausarbeitung der jeweiligen Berichtskapitel stärker herausgestellt. Dies ermöglicht eine tiefgreifende Betrachtung der Wechselwirkungen zwischen den 102 Klimawirkungen der 13 Handlungsfelder im Rahmen der aktuellen Auswertung. Dafür wurden, basierend auf den in den Kapiteln der Handlungsfelder dargestellten Zusammenhängen, die Querbezüge zwischen einzelnen Klimawirkungen identifiziert.<sup>20</sup> Zusätzlich wurde ein Abgleich mit den dargestellten Querverbindungen und Wirkbeziehungen in den Klimawirkungsketten durchgeführt (UBA 2016). Die Auswertung basiert auf der Annahme, dass negative Auswirkungen des Klimawandels auf eine Klimawirkung auch negative Folgen für die ihr nachgelagerten Wirkungen haben.

<sup>20</sup> Die Auswertung schloss damit auch die vorgelagerten Klimawirkungen mit ein, die in den Wirkungsketten direkt den klimatischen Einflüssen folgen (siehe Teilbericht 1, „Methodik und Konzept“).



Abbildung 8 stellt die Auswertung der Querverbindungen zwischen den Handlungsfeldern dar:

**Abbildung 8: Querverbindungen zwischen den Handlungsfeldern**

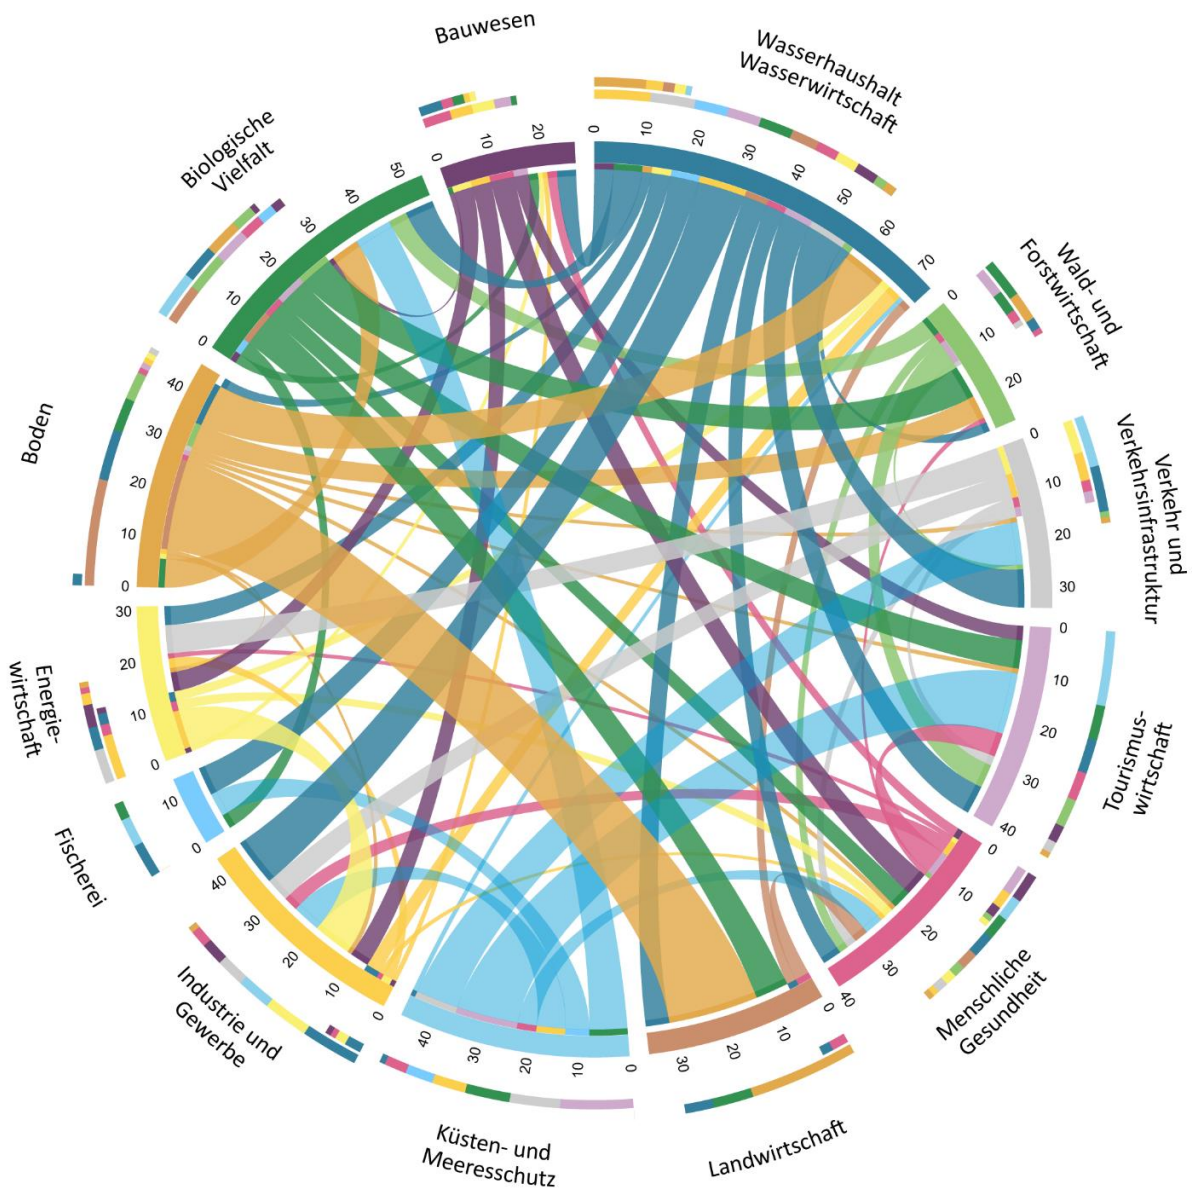

Hinweis: Die Grafik bildet die ausgehenden und eingehenden Wirkbeziehungen zwischen den 13 Handlungsfeldern ab. Die farblich durchgehenden Balken des innersten Kreises zeigen dabei die Farbe der ausgehenden Wirkbeziehungen des jeweiligen Handlungsfeldes an (zum Beispiel hellbraun für das Handlungsfeld „Boden“). Die Dicke der Verbindungen innerhalb des innersten Kreises steht für die Anzahl der Querbezüge, welche von einem Handlungsfeld ausgehend auf ein anderes Handlungsfeld einwirken. Die genaue Anzahl der eingehenden Wirkungen zu einem Handlungsfeld wird im äußersten Balken abgebildet. Die daneben liegenden inneren Balken zeigen die Anzahl der ausgehenden Wirkungen des jeweiligen Handlungsfeldes an, zum Beispiel hat das Handlungsfeld „Küsten- und Meeresschutz“ nur ausgehende Wirkbeziehungen und das Handlungsfeld „Tourismuswirtschaft“ nur eingehende Wirkbeziehungen.

Quelle: eigene Darstellung, adelphi

Im Rahmen der Analyse wurden 257 Querverbindungen identifiziert. Pro Klimawirkung gibt es mithin im Durchschnitt circa 2,5 ein- oder ausgehende Wirkungen hin zu einer anderen Klimawirkung. Unter den 102 betrachteten Klimawirkungen finden sich 71, welche sich auf andere

Klimawirkungen auswirken und 62, welche von anderen Klimawirkungen beeinflusst werden.<sup>21</sup> In der Gesamtauswertung sticht vor allem das Handlungsfeld „Wasserhaushalt, Wasserwirtschaft“ heraus, welches die meisten ausgehenden Wirkungen aufweist. Besonders stark wirken dabei die Klimawirkungen „Hochwasser“, „Niedrigwasser“ und „Gewässertemperatur und Eisbedeckung und biologische Wasserqualität“ auf andere Handlungsfelder ein. Bei den genannten Klimawirkungen handelt es sich um Klimawirkungen, welche stark durch drei der sechs identifizierten vorrangigen klimatischen Einflüsse beeinflusst werden: Starkregen, durchschnittliche Niederschlagsabnahme und den Temperaturanstieg (siehe 3.1). Viele Verknüpfungen der aufgeführten Klimawirkungen ergeben sich zu den Bereichen Verkehr und Industrie, zum Beispiel durch niedrig- oder hochwasserbedingte Einschränkungen im Warentransport, Beeinträchtigungen der Verkehrswege sowie Schäden an gewerblichen Infrastrukturen. Die Klimawirkung „Gewässertemperatur und Eisbedeckung und biologische Wasserqualität“ wirkt besonders auf aquatische Systeme und auf den Badetourismus (in Zusammenhang mit Themen der menschlichen Gesundheit, zum Beispiel durch die Förderung der Entwicklung „Potenziell schädlicher Mikroorganismen und Algen“) ein. Eine zentrale Bedeutung in der Gesamtbetrachtung aller Handlungsfelder hat die vorgelagerte Klimawirkung „Hochwasser“, die sich auf die meisten anderen Klimawirkungen auswirkt.

Neben dem Handlungsfeld „Wasserhaushalt, Wasserwirtschaft“ ist auch der Küsten- und Meeresschutz mit vergleichsweise vielen Klimawirkungen anderer Handlungsfelder verknüpft. Klimawirkungen des Handlungsfeldes „Küsten- und Meeresschutz“ beeinflussen vor allem die Tourismuswirtschaft und die Seeschifffahrt an der Küste und führen zu Veränderungen an Küstenökosystemen (unter anderem „Schiffbarkeit der Seewasserstraßen“, „Schäden an touristischen Infrastrukturen und Betriebsunterbrechungen“, „Schäden an Küstenökosystemen“). Enge Verbindungen mit anderen Handlungsfeldern weisen dabei die Klimawirkungen „Meerestemperatur und Eisbedeckung“, „Meeresspiegelhöhe“, „Sturmfluten“ und „Wasserqualität und Grundwasserversalzung“ auf, die unter anderem einen engen Bezug zu den klimatischen Einflüssen Temperaturanstieg und Starkwind haben (siehe 3.1).

Ebenfalls eine hohe Anzahl an Querverbindungen finden sich in den Handlungsfeldern „Boden“ (speziell bei den Klimawirkungen „Wassermangel im Boden“, „Vernässung“, „Sickerwasser“ und „Rutschungen und Muren“) und „Biologische Vielfalt“ (vor allem „Verschiebung von Arealen und Rückgang der Bestände“ und „Veränderung der Länge der Vegetationsperiode und Phänologie“). Beide Handlungsfelder sind eng mit der Landwirtschaft verflochten und können letztendlich Auswirkungen auf den landwirtschaftlichen Ertrag und die Qualität der Ernteprodukte haben. Weitere Auswirkungen können sich in Bezug auf „Holzerträge“ in der Forstwirtschaft ergeben. Im Handlungsfeld „Boden“ wirken zudem noch viele Klimawirkungen auf das Handlungsfeld „Wasserhaushalt, Wasserwirtschaft“ ein (insbesondere auf die Klimawirkung „Grundwasserstand und Grundwasserqualität“).

Alle Handlungsfelder mit verhältnismäßig vielen ausgehenden Wirkbeziehungen sind Teil der Cluster Wasser und Land, welche zukünftig besonders stark vom Klimawandel betroffen sein werden (siehe 2.1). Dies kann unter Umständen Kaskadeneffekte bei einer Vielzahl der mit ihnen verknüpften Klimawirkungen und Handlungsfelder auslösen. Im Cluster Land finden sich zudem viele Wirkbeziehungen innerhalb des Clusters (zum Beispiel zwischen den Handlungsfeldern „Boden“, „Biologische Vielfalt“ und „Landwirtschaft“), was den oben genannten Effekt noch verstärken könnte. Bei der Betrachtung der betroffenen Systeme wird dies noch deutlicher: fast

---

<sup>21</sup> Überschneidungen sind dabei möglich. So kann eine Klimawirkung eine ausgehende Wirkbeziehung zu einer anderen Klimawirkung aufweisen, gleichzeitig aber auch selbst von anderen Klimawirkungen beeinflusst werden.



alle Klimawirkungen mit den meisten ausgehenden Wirkbeziehungen zählen zu den natürlichen Systemen und Ressourcen.

Das Handlungsfeld, welches am meisten von anderen Handlungsfeldern beeinflusst wird, ist die Tourismuswirtschaft. Wie bereits erwähnt, finden sich hier viele eingehende Wirkungen aus dem Bereich Küsten- und Meeresschutz, aber auch die Handlungsfelder „Biologische Vielfalt“ und „Wasserhaushalt, Wasserwirtschaft“ wirken auf den Tourismus ein. Ein Grund hierfür ist die vielseitige Ausrichtung der deutschen Tourismuslandschaft. Veränderungen verschiedener Ökosysteme und Naturräume haben oft auch Auswirkungen auf den touristischen Wert der jeweiligen Region.

Auch für das Handlungsfeld „Industrie und Gewerbe“ sind viele eingehende Wirkbeziehungen erkennbar. Die eingehenden Wirkungen stammen vor allem aus den Handlungsfeldern „Wasserhaushalt, Wasserwirtschaft“ und „Energiewirtschaft“. Klimatische Auswirkungen, die zu Einschränkungen der Wasser- oder Energieversorgung führen, betreffen unter anderem die nachgelagerte wirtschaftliche Produktion. Zudem können durch Überschwemmungen oder Niedrigwasserereignisse der Warentransport beeinträchtigt und Produktionsabläufe verzögert werden.

Die enge Verflechtung der Handlungsfelder „Boden“ und „Biologische Vielfalt“ mit dem Handlungsfeld „Landwirtschaft“ wurde bereits oben hervorgehoben. Es überrascht daher nicht, dass insbesondere landwirtschaftliche Ertragsausfälle von vielen Klimawirkungen dieser Handlungsfelder beeinflusst werden und das Handlungsfeld eine hohe Anzahl an eingehenden Wirkbeziehungen aufweist.

Schlussendlich finden sich auch im Bereich menschliche Gesundheit viele eingehende Wirkbeziehungen, unter anderem aus dem Küsten- und Meeresschutz, dem Bauwesen, der biologischen Vielfalt und dem Wasserhaushalt. Ein zunehmender urbaner Wärmeinseleffekt kann beispielsweise zu einem Anstieg der Hitzebelastung in urbanen Räumen führen und die Verlängerung der Vegetationsperiode allergische Reaktionen durch Pollen verstärken. Weiterhin können Hochwasserereignisse oder Sturzfluten zu Verletzungen und Todesfällen infolge von Extremereignissen führen.

Alle genannten Handlungsfelder mit einer hohen Anzahl an eingehenden Wirkungen gehören bis auf die Landwirtschaft zu den Clustern Wirtschaft und Gesundheit. Ausgehende Wirkungen finden sich also vor allem in Bezug auf natürliche Systeme und Ressourcen, während eingehende Wirkungen naturnutzende Wirtschaftssysteme, Infrastrukturen und Gebäude sowie Menschen und soziale Systeme betreffen.

Neben den bisher aufgeführten einseitigen Querverbindungen wurden die Klimawirkungen auch auf mögliche gegenseitige Wechselwirkungen und damit Rückkopplungsschleifen untersucht. Zusätzlich zu der zu Beginn des Kapitels bereits erläuterten Wirkbeziehung zwischen steigenden Gewässertemperaturen (Handlungsfeld „Wasserhaushalt, Wasserwirtschaft“) und Einschränkungen bei der Entnahme und Einleitung von Kühlwasser (Handlungsfeld „Energiewirtschaft“) (LAWA 2017) wurden noch weitere wechselseitige Verknüpfungen identifiziert: Eine gegenseitige Beeinflussung ist bei den Klimawirkungen „Bedarf an Kühlenergie“ (Handlungsfeld „Energiewirtschaft“) und „Stadtklima/Wärmeinseln“ (Handlungsfeld „Bauwesen“) zu erkennen. Ein wärmeres Stadtklima, beziehungsweise ein verstärkter Wärmeinseleffekt, kann den Bedarf an Kühlenergie steigern. Ein erhöhter Kühlenergieverbrauch, insbesondere durch den Einsatz von Klimaanlageanlagen, kann gleichzeitig zu Temperaturerhöhungen im innerstädtischen Raum führen und zur Erhöhung der CO<sub>2</sub>-Emissionen beitragen (Salamanca et al. 2014; IEA und OECD 2018). Zusammen mit der Klimawirkung „Hitzebelastung“, die durch die oben genannte Temperaturerhöhung in Städten verstärkt auftreten kann und sich wiederum auf den Bedarf an Kühlenergie

auswirkt, bildet die genannte Wechselwirkung einen Kreislauf an Querbezügen. Der in Abbildung 9 dargestellte Rückkopplungskreislauf stellt den einzigen dieser Art in der Gesamtauswertung aller Querverbindungen dar. Er verdeutlicht die starke Belastung urbaner Räume durch hitzebedingte Folgen des Klimawandels und zeigt mögliche selbstverstärkende Einflüsse innerhalb der Querverbindungen der Klimawirkungen auf. Neben dem Bund würde Anpassung an diesen dargestellten Kreislauf auch in der Verantwortlichkeit der Kommunen liegen. Die Relevanz kommunaler Akteure zur Anpassung an die Auswirkungen des Klimawandels wird dadurch noch einmal hervorgehoben.

**Abbildung 9: Kreislauf der Querverbindungen zwischen den Klimawirkungen „Hitzebelastung“, „Bedarf an Kühlenergie“ und „Stadtklima/Wärmeinseln“**

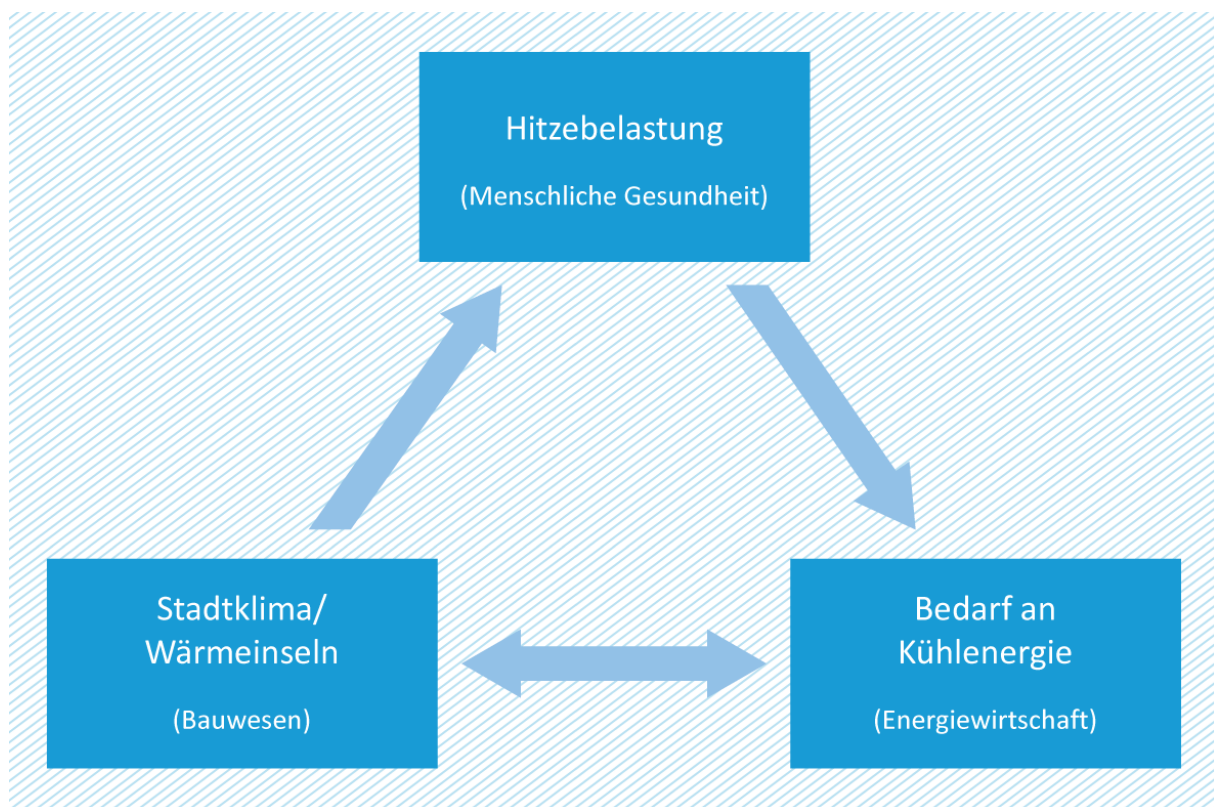

Quelle: eigene Darstellung, adelphi

Eine letzte, jedoch etwas schwächer ausgeprägte, Wechselwirkung besteht zwischen den Klimawirkungen „Verschiebung von Arealen und Rückgang der Bestände“ (Handlungsfeld „Biologische Vielfalt“) und „Vegetation in Siedlungen“ (Handlungsfeld „Bauwesen“). Eine stark durch Klimafolgen beeinträchtigte Stadtvegetation (speziell größere Flächen wie Gärten oder Stadtparks) kann zu einem Rückgang der Bestände beitragen. Werden durch den Klimawandel Arealverschiebungen, insbesondere bei Arten der Stadt- und Siedlungsvegetation, begünstigt, können diese gegebenenfalls nicht mehr optimale Wachstumsbedingungen aufweisen (LWG 2018; Schönfeld 2019).

Zusätzlich zu der Gesamtbetrachtung aller Klimawirkungen wurden in einem weiteren Analyseschritt die Querverbindungen der im Rahmen der Bewertung der Klimarisiken als hoch bewerteten Klimawirkungen (Zeitscheiben Gegenwart, Mitte und Ende des Jahrhunderts) betrachtet. Unterschiede ergaben sich dabei vor allem für die eingehenden Wirkbeziehungen. Auffällig ist, dass das Handlungsfeld „Biologische Vielfalt“ in dieser Auswertung die höchste Gesamtzahl an Querverbindungen aufweist (Summe aus eingehenden und ausgehenden Wirkbeziehungen) und am

häufigsten von anderen hoch bewerteten Klimawirkungen beeinflusst wird. Besonders viele eingehende Wirkbeziehungen lassen sich bei den Klimawirkungen „Schäden an Küstenökosystemen“, „Schäden an Feuchtgebieten und wassergebundenen Habitaten“, „Schäden an Wäldern“ und „Verschiebung von Arealen und Rückgang der Bestände“ feststellen. Wichtige Einflussfaktoren kommen dabei insbesondere aus den vorgelagerten Klimawirkungen in den Handlungsfeldern „Küsten- und Meeresschutz“ und „Wasserhaushalt, Wasserwirtschaft“. Dadurch ergibt sich eine engere Verflechtung der Cluster Land und Wasser bei Betrachtung der hohen Klimarisiken. Zudem verdeutlicht dies die vielfältige Betroffenheit der natürlichen Systeme durch viele klimatische Einflüsse (siehe 3.1) und vorgelagerte Klimawirkungen und zeigt gleichzeitig die Notwendigkeit von Anpassung bezogen auf die hoch bedeutenden Klimawirkungen der beiden Cluster auf. Durch die vielen ausgehenden Wirkbeziehungen wird noch einmal die bereits hervorgehobene Relevanz der beiden Cluster und mögliche Auswirkungen auf die Entwicklung von Klimarisiken anderer Handlungsfelder verstärkt. Gleichzeitig ist festzustellen, dass speziell die Klimawirkung „Verschiebung von Arealen und Rückgang der Bestände“ nicht nur von vielen anderen Klimawirkungen beeinflusst wird, sondern auch ausgehende Wirkbeziehungen zu den Handlungsfeldern „Landwirtschaft“, „Wald- und Forstwirtschaft“, „Fischerei“, „Bauwesen“ und „Menschliche Gesundheit“ aufweist. Damit scheint die Klimawirkung eine zentrale Position innerhalb der hoch bewerteten Klimawirkungen einzunehmen und verweist auf Auswirkungen auf die Entwicklung von Klimarisiken anderer Handlungsfelder sowie die Notwendigkeit, Maßnahmen zur Anpassung bereits hier anzusetzen (siehe 6.2).

Vergleicht man die hier dargestellten Ergebnisse mit den Resultaten der Auswertung der Querverbindungen in der VA 2015, so lassen sich mit Bezug auf die fünf Cluster grundsätzlich ähnliche Muster erkennen. Ein detaillierter Vergleich der Ergebnisse lässt sich jedoch aufgrund einiger Unterschiede in der Vorgehensweise nicht durchführen. So wurden in der VA 2015 die Querverbindungen der gesamten Wirkungsketten ausgezählt und dabei auch Wirkbeziehungen auf Ebene der Handlungsfelder sowie Überlappungen von Handlungsfeldern mit gemeinsamen Auswirkungen mit eingerechnet. Durch die detaillierte Betrachtung der 102 untersuchten Klimawirkungen war es in der KWRA 2021 möglich, spezifische Wirkbeziehungen zwischen einzelnen Klimawirkungen aufzuführen, welche durch den bereits in der Operationalisierung erfolgten Fokus auf Querbezüge noch fundierter betrachtet wurden. Dies ist auch der Grund dafür, warum im Gegensatz zur VA 2015 bei der aktuellen Auswertung die Querschnittsfelder „Finanzwirtschaft“, „Bevölkerungsschutz“ und „Raumordnung“, für welche nur die Beiträge zur Anpassungskapazität dargestellt wurden, nicht betrachtet worden sind. Vergleicht man jedoch die grundsätzlichen Aussagen der Analyse der Querverbindungen der VA 2015, so wird ersichtlich, dass auch in der damaligen Auswertung ein kaskadenartiger Effekt ausgehender Wirkbeziehungen der Cluster Land und Wasser auf die Cluster Wirtschaft, Gesundheit und Infrastruktur festgestellt wurden. Auch die zentrale Rolle des Handlungsfeldes „Wasserhaushalt, Wasserwirtschaft“ bleibt in beiden Auswertungen bestehen. Ein wesentlicher Unterschied ergibt sich in Bezug auf das Handlungsfeld „Energiewirtschaft“, welches in der VA 2015 noch eine zentralere Position im Vergleich zur aktuellen Auswertung eingenommen hat.

### Kernaussagen der Analyse der Querverbindungen

- ▶ Insgesamt bestehen 257 Querverbindungen zwischen den 102 Klimawirkungen der 13 Handlungsfelder, wobei aus- und eingehende Wirkbeziehungen unterschieden werden können und somit von vor- und nachgelagerten Klimawirkungen gesprochen werden kann.
- ▶ Ausgehende Wirkbeziehungen finden sich vor allem bei natürlichen Systemen und Ressourcen in den Handlungsfeldern „Wasserhaushalt, Wasserwirtschaft“, „Küsten- und Meereschutz“, „Boden“ und „Biologische Vielfalt“. Die Klimawirkung „Hochwasser“ weist die meisten ausgehenden Wirkbeziehungen auf.
- ▶ Eingehende Wirkbeziehungen betreffen besonders naturnutzende Wirtschaftssysteme, Infrastrukturen und Gebäude sowie Menschen und soziale Systeme („Tourismuswirtschaft“, „Industrie und Gewerbe“, „Landwirtschaft“ und „Menschliche Gesundheit“). Die Klimawirkung „Schäden an touristischen Infrastrukturen und Betriebsunterbrechungen“ wird dabei von den meisten anderen Klimawirkungen beeinflusst, was ihre Abhängigkeit von Aktivitäten in anderen Handlungsfeldern, auch bei der Anpassung, verdeutlicht.
- ▶ Die Handlungsfelder mit verhältnismäßig vielen ausgehenden Wirkbeziehungen sind Teil der Cluster Wasser und Land, welche zukünftig besonders stark vom Klimawandel betroffen sein werden. Dies kann unter Umständen Kaskadeneffekte bei einer Vielzahl der mit ihnen verknüpften Klimawirkungen und Handlungsfelder in den Clustern Wirtschaft, Infrastruktur und Gesundheit auslösen.
- ▶ Bei Betrachtung der hohen Klimarisiken bestehen die meisten Querbezüge im Handlungsfeld „Biologische Vielfalt“. Die vielen eingehenden Wirkbeziehungen weisen auf die vielfache Gefährdung durch den Klimawandel hin. Die Klimawirkung „Verschiebung von Arealen und Rückgang der Bestände“ nimmt eine zentrale Position mit vielen ausgehenden und eingehenden Wirkbeziehungen ein.
- ▶ In urbanen Räumen scheint es eine enge Verknüpfung der Wirkbeziehungen zwischen den Klimawirkungen „Hitzebelastung“, „Bedarf an Kühlenergie“ und „Stadtklima/Wärmeinseln“ und dadurch sogar einen sich selbst verstärkenden Rückkopplungskreislauf zu geben.

## 4 Auswertung räumlicher Muster

Autoren: Alice Crespi, Kathrin Renner, Marc Zebisch | Eurac Research, Bozen  
Maiko Voß, Walter Kahlenborn | adelphi, Berlin

### 4.1 Hintergrund, Ziel und Datengrundlage

Im Rahmen der KWRA 2021 wurden kartographische Darstellungen von Klimaräumen in Deutschland erarbeitet. Die Karten bilden die möglichen künftigen Veränderungen des Klimas in Deutschland anhand mehrerer Klimaindikatoren ab. Zu diesem Zweck wurden (wie auch schon für die VA 2015) Klimaraumtypen für drei Zeiträume berechnet. Unter Klimaraumtypen sind hinsichtlich ihres Klimas homogene, voneinander abgrenzbare Räume zu verstehen, die mittels Clusteranalyse identifiziert wurden. Die Erstellung der Klimaraumtypen der KWRA 2021 erfolgte in Anlehnung an die in der VA 2015 angewandte Methodik, mit dem Unterschied der Verwendung der in der gesamten KWRA 2021 zugrundeliegenden Klimaprojektionen und -indikatoren für Deutschland und eines erweiterten Sets an Indikatoren, für den Bezugszeitraum (1971 bis 2000), die Mitte des Jahrhunderts (2031 bis 2060) und das Ende des Jahrhunderts (2071 bis 2100) (siehe Teilbericht 1, „Klimaprojektionen“).

Zusätzlich zur Analyse der Klimaraumtypen wurden sogenannte klimatische Hotspot-Karten erstellt. Diese bilden jene Räume in Deutschland ab, in denen einzelne Klimaindikatoren extreme Werte oder starke Änderungen aufweisen (siehe 4.2). Gewichtete aggregierte klimatische Hotspot-Karten zeigen die Regionen in Deutschland, in denen Extreme beziehungsweise starke Änderungen der für die hohen Klimarisiken relevanten Klimaindikatoren auftreten können (siehe 4.3). Hierbei ist hervorzuheben, dass ausschließlich meteorologische Variablen in diese Analysen eingeflossen sind.

Grundlage der Berechnung der Klimaraumtypen und der klimatischen Hotspot-Karten sind die in der KWRA 2021 der Klimawirkungsanalyse zugrundeliegenden, vom Deutschen Wetterdienst bereitgestellten Referenzdaten für den Bezugszeitraum (1971 bis 2000), Mitte des Jahrhunderts (2031 bis 2060) und Ende des Jahrhunderts (2071 bis 2100) in fünf mal fünf Kilometer räumlicher Auflösung. Die methodischen Grundlagen der Berechnungen sind im Teilbericht 1 im Kapitel „Klimaprojektionen“ beschrieben.

### 4.2 Klimaraumtypen

#### 4.2.1 Klassifizierung der Klimaraumtypen und Ergebnisdarstellung

Die Berechnung der Klimaraumtypen mittels Clusteranalyse ergab die in Abbildung 10 dargestellten Klimaraumtypen.



Abbildung 10: Kartendarstellung der sieben Klimaraumtypen als Ergebnis der k-means Clusteranalyse der 14 Klimaindikatoren für den Bezugszeitraum (1971 bis 2000)

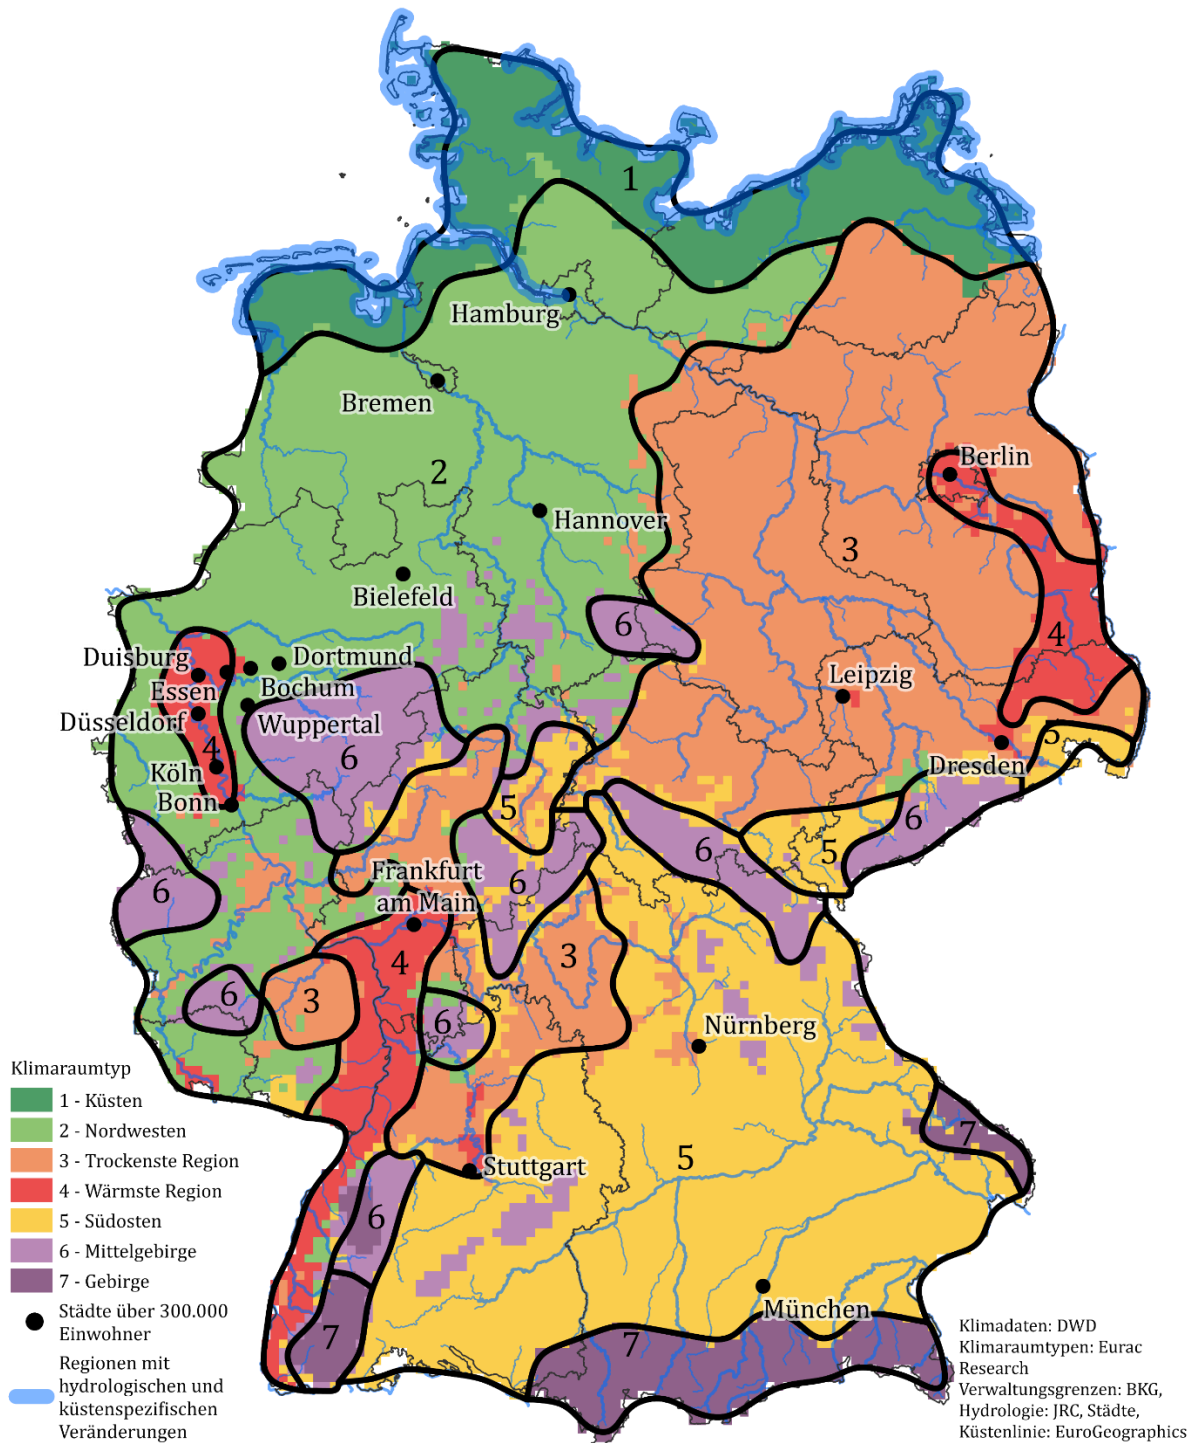

Quelle: eigene Darstellung, Eurac Research

Um das Klima des Bezugszeitraums für jedes Cluster zu beschreiben und um die für jedes Cluster relevantesten Indikatoren zu identifizieren, wurde für jeden Indikator der Mittelwert aller Rasterzellen innerhalb eines Clusters bestimmt. Die Ergebnisse sind in Tabelle 18 abgebildet. Entsprechend der Mittelwerte der Indikatoren, der geographischen Lage und der Topographie wurden den sieben Clustern Namen zugeordnet.



**Tabelle 18: Mittelwerte der Klimaindikatoren für den Bezugszeitraum (1971 bis 2000) für alle Rasterzellen innerhalb eines Klimaraumtyps**

Maximum- und Minimumwerte sind jeweils in orange beziehungsweise blau hinterlegt

| Indikator                               | Süd-<br>osten | Mittelg<br>ebirge | Küste | Trockenste<br>Region | Nord-<br>westen | Gebirge | Wärmste<br>Region |
|-----------------------------------------|---------------|-------------------|-------|----------------------|-----------------|---------|-------------------|
| Mittlere Niederschlagssumme Winter (mm) | 176,3         | 269,5             | 166,4 | 131,9                | 189,4           | 324,3   | 156,0             |
| Mittlere Niederschlagssumme Sommer (mm) | 268,7         | 255,9             | 204,9 | 182,3                | 210,7           | 491,6   | 205,3             |
| Mittlere Temperatur Winter (°C)         | -0,2          | -0,1              | 1,4   | 0,9                  | 1,9             | -1,1    | 2,0               |
| Mittlere Temperatur Sommer (°C)         | 16,5          | 15,3              | 16,2  | 17,2                 | 16,7            | 14,8    | 18,2              |
| Trockentage im Winter (Anzahl Tage)     | 57,5          | 50,7              | 56,4  | 60,7                 | 54,7            | 53,4    | 58,7              |
| Anzahl Trockentage im Sommer            | 56,4          | 56,7              | 59,8  | 62,8                 | 58,7            | 47,2    | 61,2              |
| Jährliche Anzahl Starkregentage         | 5,2           | 7,1               | 2,7   | 2,4                  | 3,3             | 17,7    | 3,3               |
| Extremer Wind (m/s)                     | 6,3           | 6,6               | 8,5   | 6,8                  | 7,1             | 5,9     | 6,1               |
| Jährliche Anzahl Heiße Tage             | 4,2           | 1,8               | 1,8   | 6,5                  | 4,5             | 1,4     | 9,2               |
| Jährliche Anzahl Tropische Nächte       | 0,0           | 0,0               | 0,1   | 0,1                  | 0,1             | 0,0     | 0,5               |
| Jährliche Anzahl Frosttage              | 105,2         | 102,8             | 68,2  | 81,6                 | 68,9            | 130,4   | 66,0              |
| Kontinentalität (°C)                    | 19,1          | 16,2              | 13,9  | 17,4                 | 14,5            | 17,9    | 17,6              |
| Tägliche Temperaturspanne Winter (°C)   | 5,9           | 5,2               | 4,5   | 5,3                  | 5,1             | 7,3     | 5,3               |
| Tägliche Temperaturspanne Sommer (°C)   | 10,9          | 9,7               | 8,7   | 10,7                 | 10,0            | 10,0    | 10,5              |

#### 4.2.2 Beschreibung der Klimaraumtypen

In der nachfolgenden Beschreibung der Klimaraumtypen sind stets die mittleren Werte je Klimaraumtyp zugrunde gelegt.

Das Klima der „**Küsten**“ ist – bei Betrachtung der räumlichen Mittelwerte - durch die höchsten extremen Windgeschwindigkeiten und die geringste Temperaturschwankungsbreite sowohl im Jahres- als auch im Tagesmittel gekennzeichnet. Hier sind in Zukunft ein vergleichsweise geringer Temperaturanstieg, der zu weniger Frosttagen führt, und geringe durchschnittliche Niederschlagsänderungen aber mehr Starkregentage zu erwarten, mit einer Tendenz zu feuchteren Wintern.

Das Klima des „**Nordwestens**“, einschließlich der Nordwestdeutschen Tiefebene bis hin zum Pfälzer Wald im Westen, ist durch ein ähnlich gemäßigtes Klima wie die Küste gekennzeichnet, jedoch weniger windig und mit etwas höheren Temperaturen. In Zukunft wird es auch hier zu einem vergleichsweise moderaten Temperaturanstieg und weniger Frosttagen kommen, aber mit deutlich häufigeren Temperaturextremen als an der Küste. Wie an der Küste sinken die Frosttage und steigen die Starkregentage.

Das Klima der „**Trockensten Region**“ weist im Durchschnitt die geringsten Niederschläge und die meisten Trockentagen auf sowie hohe Sommertemperaturen. Auch in Zukunft wird diese Region, zu der der größte Teil Ostdeutschlands sowie Teile der Mitte Deutschlands gehören, die trockenste in Deutschland bleiben. Trotzdem steigen die Starkregentage. Die Erwärmung und Veränderung des Niederschlags liegen im deutschen Durchschnitt. Die Anzahl der Hitzetage und tropischen Nächte steigt überdurchschnittlich.

Das Klima der „**Wärmsten Region**“ weist die höchsten mittleren Temperaturen und meisten Hitzetage und tropischen Nächte in Deutschland auf. Sie findet sich im Westen Deutschlands entlang des Rheins und im Osten in Nähe der Spree. Dies wird voraussichtlich auch in Zukunft die wärmste Region bleiben, denn hier ist der größte Zuwachs an heißen Tagen und Tropennächten zu erwarten. Gleichzeitig kann dort der mittlere Niederschlag im Winter relativ stark zunehmen.

Das Klima des „**Südostens**“, der von Baden-Württemberg bis Sachsen reicht, zeichnet sich durch eine relativ hohe Kontinentalität (Spannweite zwischen Sommer- und Wintertemperatur) aus. Es ist eine der Regionen, die sich in Zukunft voraussichtlich am stärksten erwärmen, mit deutlich mehr Hitzetagen. Im Sommer ist außerdem mit zurückgehenden Niederschlägen und häufigeren Trockenperioden zu rechnen.

Das Klima des "**Mittelgebirges**" ist kühl-gemäßigt mit hohen Winterniederschlägen und relativ häufigen Starkniederschlägen. In Zukunft können hier die Niederschläge im Winter sowie die Starkregentage ganzjährig deutlich zunehmen, während im Sommer die Niederschläge stark zurückgehen und die Anzahl der Trockentage zunimmt.

Das Klima des "**Gebirges**" ist durch feuchte Bedingungen sowohl im Hinblick auf den mittleren Niederschlag als auch auf die Niederschlagsextreme sowie durch niedrige Temperaturen definiert. In Zukunft können insbesondere die sommerlichen Niederschläge abnehmen, die Trockentage im Sommer und die Winterniederschläge zunehmen, die dann auf Grund der höheren Temperaturen verstärkt als Regen fallen werden. Auch die Starkregentage nehmen überdurchschnittlich zu während Frosttage überdurchschnittlich abnehmen. Die absolute, durchschnittliche Erwärmung und der relative Anstieg der Hitzetage sind hier am größten.

#### **4.2.3 Auswertung der Änderungen bis Mitte und Ende des Jahrhunderts**

Für die Beschreibung der Klimaänderungen je Klimaraumtyp für die Mitte und das Ende des Jahrhunderts wurden die Klimaprojektionen für RCP8.5-Szenario herangezogen. Die Änderungswerte wurden für die 14 zur Erzeugung der Klimaraumtypen des Bezugszeitraums verwendeten Indikatoren für das 50. Perzentil der Projektionen dieses Szenarios berechnet. Um die Breite der Modelvariabilität in den zukünftigen Änderungen abzubilden, wurden zusätzlich noch das 15. und 85. Perzentil der Projektionen berechnet. Für jeden mit der k-means Clusteranalyse berechneten Klimaraumtyp für den Bezugszeitraum wurden die mittleren Abweichungen der Indikatoren in beiden Zukunftszeitscheiben berechnet und in Absolut- sowie Änderungswerten dargestellt. Für Indikatoren, die auf der Temperatur basieren und die in Grad Celsius ausgedrückt werden, werden nur absolute Änderungen abgebildet. Abbildung 11 zeigt, wie sich Temperatur, Hitze, Trockenheit und Starkregen in den Klimaraumtypen bis zur Mitte des Jahrhunderts ändern werden.

**Abbildung 11: Durchschnittliche Veränderung ausgewählter Klimaparameter (2031 bis 2060) im Vergleich zum Bezugszeitraum (1971 bis 2000)**

|                                                                                                                                       | Küsten                                                                            | Nordwesten                                                                        | Trockenste Region                                                                 | Wärmste Region                                                                     | Südosten                                                                            | Mittelgebirge                                                                       | Gebirge                                                                             |
|---------------------------------------------------------------------------------------------------------------------------------------|-----------------------------------------------------------------------------------|-----------------------------------------------------------------------------------|-----------------------------------------------------------------------------------|------------------------------------------------------------------------------------|-------------------------------------------------------------------------------------|-------------------------------------------------------------------------------------|-------------------------------------------------------------------------------------|
|  Durchschnittliche Temperatur im Sommer              |  |  |  |  |  |  |  |
|  Hitze (Anzahl Heißer Tage)                          |  |  |  |  |  |  |  |
|  Trockenheit (Anzahl der Trockentage im Sommer)      |  |  |  |  |  |  |  |
|  Starkregen (Anzahl der Tage mit Niederschlag >20mm) |  |  |  |  |  |  |  |

 Fast gleichbleibend  
 Durchschnittlich zunehmend (die durchschnittliche Veränderung ist ungefähr gleich dem Mittelwert)  
 Stark zunehmend (die Veränderung ist ungefähr größer als der Mittelwert plus ½ Standardabweichung)  
 Sehr stark zunehmend (die Veränderung ist größer als der Mittelwert plus Standardabweichung)

Quelle: eigene Darstellung, Eurac Research

Die Änderungen aller in die Analyse eingegangenen Indikatoren sind für die Mitte des Jahrhunderts für das 50. Perzentil in Tabelle 19 dargestellt. Die größten Änderungen (Absolutwerte und relative Änderungen) über alle Klimaraumtypen hinweg sind beim mittleren Niederschlag im Winter, bei der Anzahl der Heißen Tage und der tropischen Nächten sowie bei den Frosttagen festzustellen. Die insgesamt größten Änderungen werden für die Anzahl an tropischen Nächten projiziert. Hinsichtlich der einzelnen Klimaraumtypen weist der Südosten besonders hohe Zunahmen bei der Mittleren Temperatur im Winter (2,1 Grad Celsius) und im Sommer (zwei Grad Celsius) auf. Die Mittelgebirge verzeichnen im Vergleich mit den anderen Klimaraumtypen die größte relative Abnahme des Mittleren Niederschlags im Sommer (-3 Prozent), wenn auch im einstelligen Bereich. Für die Küsten zeigen die Berechnungen die höchsten Abnahmen in der Anzahl der Frosttage (-40 Prozent). Ebenso auffällig sind die starken Zunahmen an Starkregentagen (30 Prozent) im Klimaraumtyp „Küsten“. Für die trockenste Region werden die höchsten absoluten Abnahmen an Trockentagen im Winter (-0,9 Tage) ausgewiesen. Gleichzeitig ist laut Berechnungen eine hohe Zunahme an Starkregentagen (30 Prozent) festzustellen. Ebenso hoch sind die relativen Abnahmen an Frosttagen (-35 Prozent) und die absolute Zunahme an Heißen Tagen (8 Tage). Der Nordwesten sticht durch hohe relative Abnahmen bei den Frosttagen (-37 Prozent) und relative hohe Zunahmen an Starkregentagen (25 Prozent) hervor. Für den Klimaraumtyp „Gebirge“ sind die absoluten Abnahmen an Frosttagen (-31,8 Tage) zu bemerken. Auch die Trockentage im Sommer sollen laut Berechnungen mit fünf Prozent im Gebirge am meisten zunehmen. In der wärmsten Region nimmt der mittlere Niederschlag im Winter mit 11 Prozent besonders stark zu, und die absoluten Änderungen sind für die tropischen Nächte (5 Tage) und heißen Tage (10,4 Tage) am höchsten projiziert. Für die klimatischen Einflüsse Kontinentalität, Temperaturspanne im Winter und Temperaturspanne im Sommer zeigen die Berechnungen für Mitte des Jahrhunderts für alle Klimaraumtypen nur sehr geringe Änderungen.

**Tabelle 19: Absolute und relative Änderungen für Mitte des Jahrhunderts in den sieben Klimaraumtypen im RCP8.5-Szenario bezogen auf den Bezugszeitraum (1971 bis 2000)**

Alle Indikatoren wurden vom 50. Perzentil der Projektionen berechnet. Absolutwerte für Niederschlag sind in Millimeter, für Temperatur in Grad Celsius und für Windgeschwindigkeit in Meter pro Sekunde angegeben. Temperaturänderungen sind nur absolut ausgedrückt. Relative Änderungen größer als 500 Prozent sind mit ## dargestellt.

| Änderungen                       | Südosten      |     | Mittelgebirge |     | Küsten |      | Trockenste Region |     | Nordwesten |     | Gebirge |     | Wärmste Region |     |
|----------------------------------|---------------|-----|---------------|-----|--------|------|-------------------|-----|------------|-----|---------|-----|----------------|-----|
|                                  | 50. Perzentil |     |               |     |        |      |                   |     |            |     |         |     |                |     |
|                                  | Abs           | %   | Abs           | %   | Abs    | %    | Abs               | %   | Abs        | %   | Abs     | %   | Abs            | %   |
| Mittlere Niederschlag Winter     | 18,3          | 10  | 23,1          | 9   | 19,1   | 11   | 16,0              | 12  | 19,3       | 10  | 26,1    | 8   | 17,3           | 11  |
| Mittlere Niederschlag Sommer     | -1,1          | 0   | -8,0          | -3  | 3,7    | 1    | 2,4               | 1   | -3,6       | -2  | -9,6    | -2  | -1,2           | -1  |
| Mittlere Temperatur Winter       | 2,1           |     | 2,0           |     | 2,0    |      | 2,1               |     | 1,9        |     | 2,1     |     | 1,9            |     |
| Mittlere Temperatur Sommer       | 2,0           |     | 1,9           |     | 1,9    |      | 1,9               |     | 1,8        |     | 2,0     |     | 1,9            |     |
| Trockentage im Winter            | -0,7          | -1  | -0,2          | 0   | -0,3   | -1   | -0,9              | -1  | -0,2       | 0   | -0,2    | 0   | -0,6           | -1  |
| Trockentage im Sommer            | 2,4           | 4   | 2,5           | 4   | 1,7    | 3    | 1,9               | 3   | 2,2        | 4   | 2,6     | 5   | 2,1            | 3   |
| Starkregentage                   | 1,0           | 20  | 1,2           | 17  | 0,8    | 30   | 0,7               | 30  | 0,8        | 25  | 1,4     | 8   | 0,8            | 25  |
| Extremer Wind                    | 0,0           | 0   | 0,0           | 0,4 | 0,0    | 0    | 0,0               | 0   | 0,0        | 0   | 0,0     | 0   | 0,0            | 0   |
| Heiße Tage                       | 8,7           | 204 | 4,7           | 256 | 2,8    | 159  | 8,0               | 123 | 5,9        | 130 | 4,8     | 354 | 10,4           | 112 |
| Tropische Nächte                 | 0,9           | ##  | 0,8           | ##  | 1,1    | 1241 | 2,1               | ##  | 1,4        | ##  | 0,3     | ##  | 5,0            | 922 |
| Frosttage                        | -30,4         | -29 | -32,6         | -32 | -27,5  | -40  | -28,4             | -35 | -25,3      | -37 | -31,8   | -24 | -24,1          | -37 |
| Kontinentalität                  | -0,2          |     | -0,2          |     | -0,2   |      | -0,3              |     | -0,1       |     | -0,1    |     | -0,1           |     |
| Tägliche Temperaturspanne Winter | -0,1          |     | -0,2          |     | 0,0    |      | -0,1              |     | 0,0        |     | -0,3    |     | 0,0            |     |
| Tägliche Temperaturspanne Sommer | 0,0           |     | 0,0           |     | -0,2   |      | -0,2              |     | -0,2       |     | 0,1     |     | -0,1           |     |

Die Änderungen für das Ende des Jahrhunderts für das 50. Perzentil sind in Tabelle 20 dargestellt. Insgesamt die größten Änderungswerte sind wie in der Mitte des Jahrhunderts bei der Anzahl an Heißen Tagen und tropischen Nächten sowie den Frosttagen festzustellen. Für die einzelnen Klimaraumtypen sind folgende Ausprägungen bemerkenswert. Für den Südosten werden die höchsten relativen Zunahmen an Niederschlag im Winter (21 Prozent) projiziert sowie hohe Zunahmen an tropischen Nächten. Bei den Mittelgebirgen sind die absoluten Abnahmen an Frosttagen (-63 Tage) sowie des Niederschlags im Sommer (-23 Millimeter) bemerkenswert. Die Küsten weisen die vergleichsweise größten relativen Zunahmen an tropischen Nächten sowie Starkregentagen (56 Prozent), aber auch relativen Abnahmen an Frosttagen (-65 Prozent) auf. Den Berechnungen können wir für diesen Klimaraumtyp zudem eine abnehmende Kontinentalität (-0,7 Prozent) sowie tägliche Temperaturspanne im Sommer (-0,4 Grad Celsius) entnehmen. Für die trockenste Region und den Nordwesten werden hohe relative Abnahmen bei den Frosttagen (-61 und -63 Prozent) und hohe relative Zunahmen der tropischen Nächte sowie Heißen Tage erwartet. Für den Klimaraumtyp „Gebirge“ werden die höchsten relativen Zunahmen an

Heißen Tagen sowie Trockentagen im Sommer (14 Prozent) und höchsten relativen Abnahmen an Niederschlag im Sommer (-10 Prozent) projiziert. Bei der wärmsten Region fallen die hohen absoluten Zunahmen an Heißen Tagen (27,8 Tage) und tropischen Nächten (19,1 Tage) auf. Für den mittleren Niederschlag im Winter wurde eine Zunahme von 20 Prozent bis Ende des Jahrhunderts berechnet.

**Tabelle 20: Absolute und relative Änderungen für Ende des Jahrhunderts in den sieben Klimaraumtypen im RCP8.5-Szenario bezogen auf den Bezugszeitraum (1971 bis 2000)**

Alle Indikatoren wurden vom 50. Perzentil der Projektionen berechnet. Absolutwerte für Niederschlag sind in Millimeter, für Temperatur in Grad Celsius und für Windgeschwindigkeit in Meter pro Sekunde angegeben. Temperaturänderungen sind nur absolut ausgedrückt. Relative Änderungen größer als 500 Prozent sind mit ## dargestellt.

| Änderungen                       | Südosten      |     | Mittelgebirge |     | Küsten |     | Trockenste Region |     | Nordwesten |     | Gebirge |     | Wärmste Region |     |
|----------------------------------|---------------|-----|---------------|-----|--------|-----|-------------------|-----|------------|-----|---------|-----|----------------|-----|
|                                  | 50. Perzentil |     |               |     |        |     |                   |     |            |     |         |     |                |     |
|                                  | Abs           | %   | Abs           | %   | Abs    | %   | Abs               | %   | Abs        | %   | Abs     | %   | Abs            | %   |
| Mittlere Niederschlag Winter     | 36,7          | 21  | 37,8          | 14  | 29,1   | 17  | 25,4              | 19  | 29,8       | 16  | 47,8    | 15  | 31,6           | 20  |
| Mittlere Niederschlag Sommer     | -17,1         | -6  | -22,7         | -9  | -14,0  | -5  | -4,6              | -3  | -15,8      | -7  | -50,9   | -10 | -12,5          | -6  |
| Mittlere Temperatur Winter       | 4,1           |     | 3,9           |     | 3,8    |     | 3,9               |     | 3,7        |     | 4,3     |     | 3,8            |     |
| Mittlere Temperatur Sommer       | 4,1           |     | 3,9           |     | 3,4    |     | 3,7               |     | 3,7        |     | 4,3     |     | 3,9            |     |
| Trockentage im Winter            | -1,7          | -3  | -0,9          | -2  | -1,0   | -2  | -1,7              | -3  | -1,1       | -2  | -0,9    | -2  | -1,5           | -3  |
| Trockentage im Sommer            | 5,6           | 10  | 5,4           | 10  | 4,3    | 7   | 4,0               | 6   | 4,9        | 8   | 6,7     | 14  | 5,0            | 8   |
| Starkregentage                   | 1,9           | 38  | 2,2           | 31  | 1,5    | 56  | 1,2               | 52  | 1,6        | 50  | 2,2     | 12  | 1,5            | 44  |
| Extremer Wind                    | 0,1           | 1   | 0,1           | 1,3 | 0,0    | 0   | 0,0               | 1   | 0,0        | 0   | 0,0     | 0   | 0,0            | 0   |
| Heiße Tage                       | 26,9          | ##  | 15,7          | ##  | 8,3    | 464 | 21,7              | 333 | 16,6       | 365 | 19,8    | ##  | 27,8           | 301 |
| Tropische Nächte                 | 7,7           | ##  | 5,2           | ##  | 6,9    | ##  | 10,4              | ##  | 7,6        | ##  | 3,8     | ##  | 19,1           | ##  |
| Frosttage                        | -59,6         | -57 | -63,0         | -61 | -44,5  | -65 | -50,1             | -61 | -43,6      | -63 | -70,1   | -54 | -42,2          | -64 |
| Kontinentalität                  | 0,1           |     | 0,0           |     | -0,7   |     | -0,4              |     | -0,1       |     | 0,1     |     | 0,2            |     |
| Tägliche Temperaturspanne Winter | 0,0           |     | -0,1          |     | 0,0    |     | 0,0               |     | 0,0        |     | -0,2    |     | 0,1            |     |
| Tägliche Temperaturspanne Sommer | 0,2           |     | 0,1           |     | -0,4   |     | -0,2              |     | -0,2       |     | 0,4     |     | 0,0            |     |

#### 4.2.4 Auswertung der Änderungen je klimatischer Einfluss für Ende des Jahrhunderts

Die bisherige Auswertung der Änderungswerte je Klimaraumtyp bezog sich auf die Berechnungen für das 50. Perzentil. Um die ganze Spannbreite der möglichen projizierten Änderungen abzubilden, sind im folgenden Abschnitt die absoluten Änderungen einzelner klimatischer Einflüsse für das Ende des Jahrhunderts für das 15. und 85. Perzentil des RCP8.5 in Form von Karten dargestellt.

Die größten Zunahmen an Heißen Tagen im Jahresmittel finden sich im Klimaraumtyp „Wärmste Region“ und schwanken von 20 Tagen 15. Perzentil bis maximal 56 Tagen im 85. Perzentil. Im Klimaraumtyp „Südosten“ werden für das Unterbayerische Hügelland, die Schwäbische Alb und Teile des Schwarzwaldes ebenfalls hohe Zunahmen an Heißen Tagen projiziert (Abbildung 12).



**Abbildung 12: Projizierte absolute Änderungen der mittleren jährlichen Anzahl Heißer Tage (RCP 8.5) für das Ende des Jahrhunderts**

Linke Abbildung: 15. Perzentil, rechte Abbildung: 85. Perzentil.

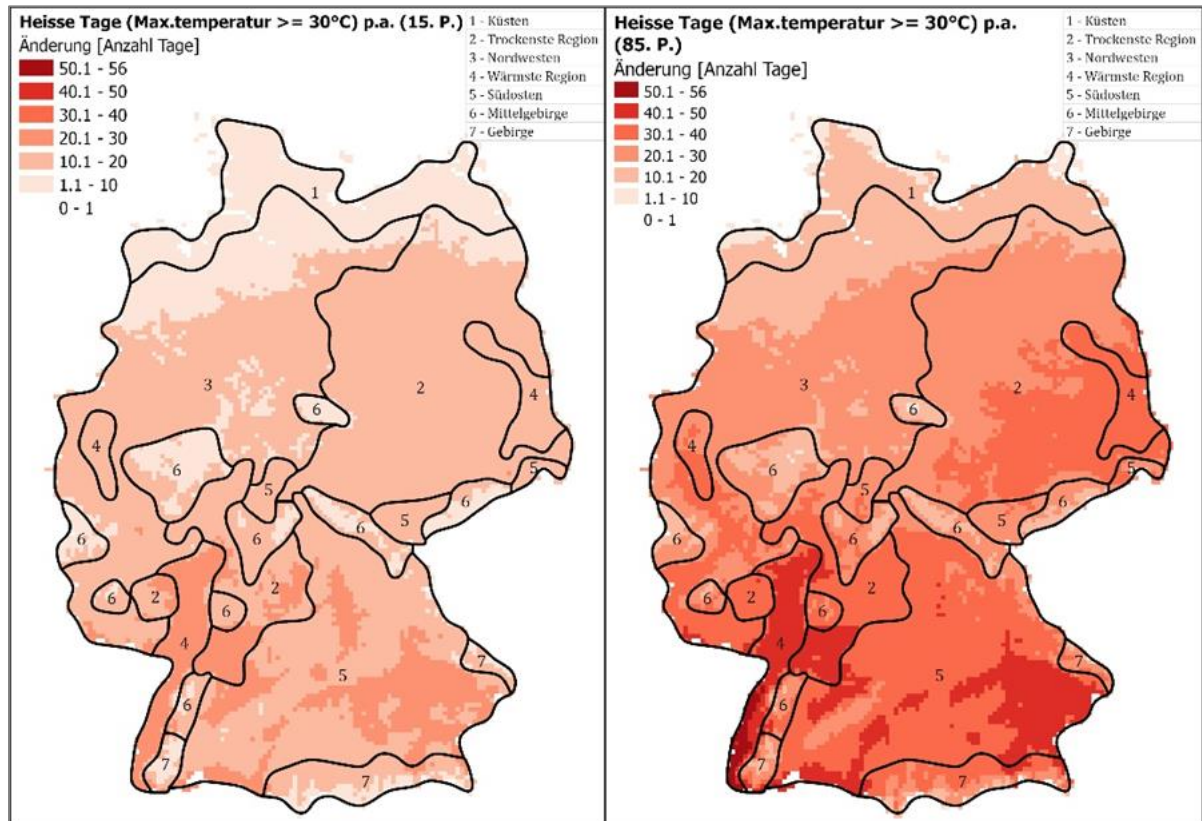

Quelle: eigene Darstellung, Eurac Research



Abbildung 13 zeigt die projizierten Änderungen der mittleren jährlichen Frosttage für Ende des Jahrhunderts. Am stärksten von hohen Abnahmen an Frosttagen betroffen sind die Klimaraumtypen „Gebirge“ und „Mittelgebirge“ für die im 15. Perzentil Werte von -80 bis -120 Tage im jährlichen Mittel berechnet wurden. Im 85. Perzentil ist neben den Gebirgen und Mittelgebirgen auch der Osten und Südosten Deutschlands mit Abnahmen von maximal bis -60 Tagen betroffen. Größere Abnahmen sagen die Berechnungen im 15. Perzentil ausschließlich für vereinzelte kleine Gebiete in den Alpen und im Bayrischen Wald voraus.

**Abbildung 13: Projizierte absolute Änderungen der mittleren jährlichen Anzahl Frosttage (RCP 8.5) für das Ende des Jahrhunderts**

Linke Abbildung: 15. Perzentil, rechte Abbildung: 85. Perzentil.

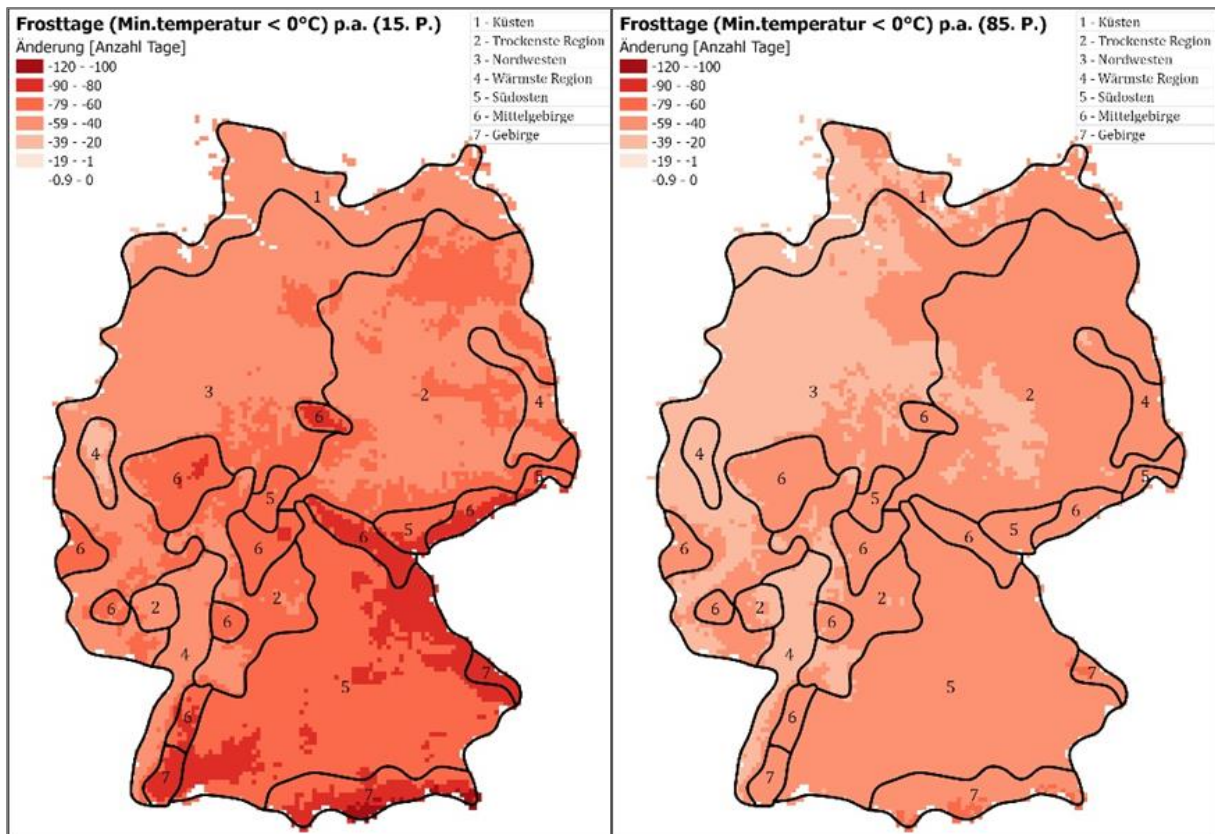

Quelle: eigene Darstellung, Eurac Research

Bezüglich der Änderungen der mittleren Temperatur im Sommer zeigen die Modellierungen im 15. Perzentil das südliche Deutschland und im 85. Perzentil das südliche Deutschland und den Südosten als die am stärksten von Zunahmen betroffenen Regionen (Abbildung 14).

**Abbildung 14: Projizierte absolute Änderungen der mittleren jährlichen Temperatur im Sommer (RCP 8.5) für das Ende des Jahrhunderts**

Linke Abbildung: 15. Perzentil, rechte Abbildung: 85. Perzentil.

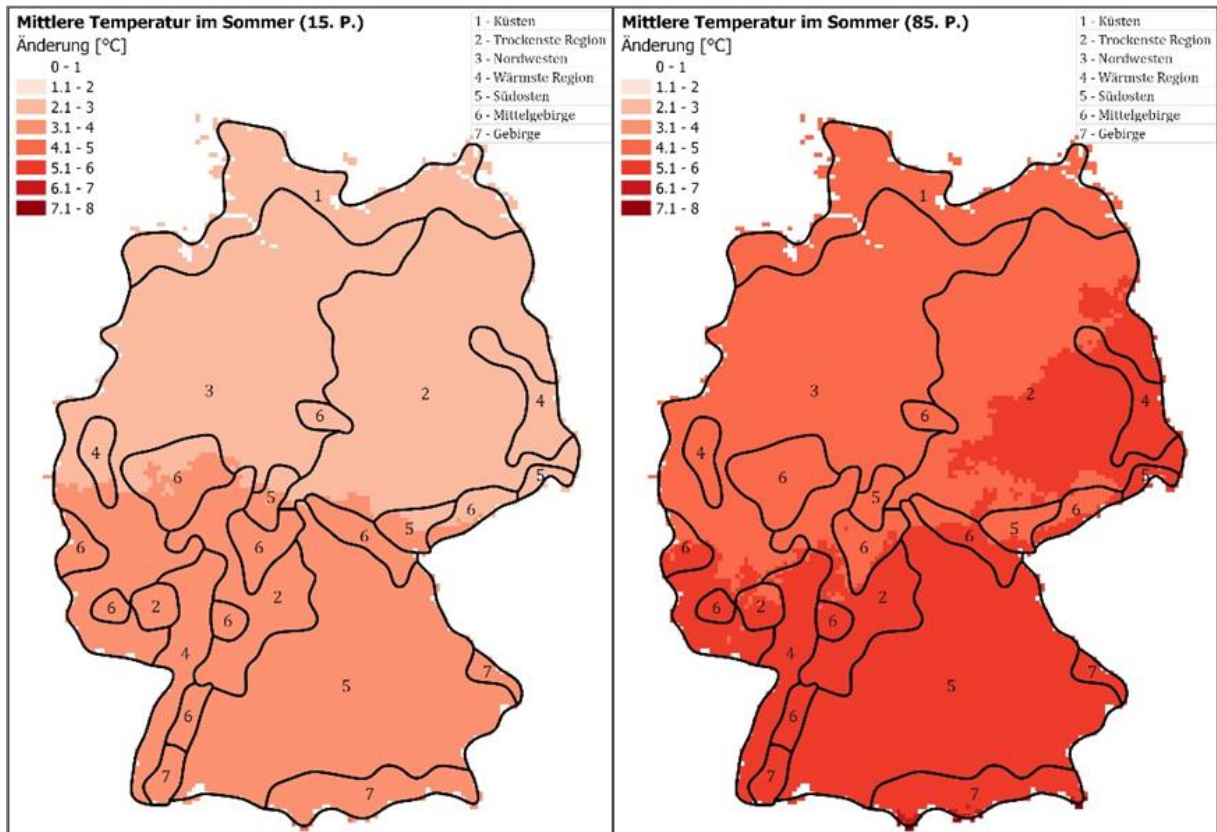

Quelle: eigene Darstellung, Eurac Research

An Abbildung 15 lässt sich bei den Projektionen der Änderungen der mittleren Temperatur im Winter ein homogenes Bild für fast ganz Deutschland feststellen. Einzig im 85. Perzentil sind die Zunahmen in den Alpen, im Bayrischen Wald und im Erzgebirge höher als im Rest des Landes.

**Abbildung 15: Projizierte absolute Änderungen der mittleren jährlichen Temperatur im Winter (RCP 8.5) für das Ende des Jahrhunderts**

Linke Abbildung: 15. Perzentil, rechte Abbildung: 85. Perzentil.

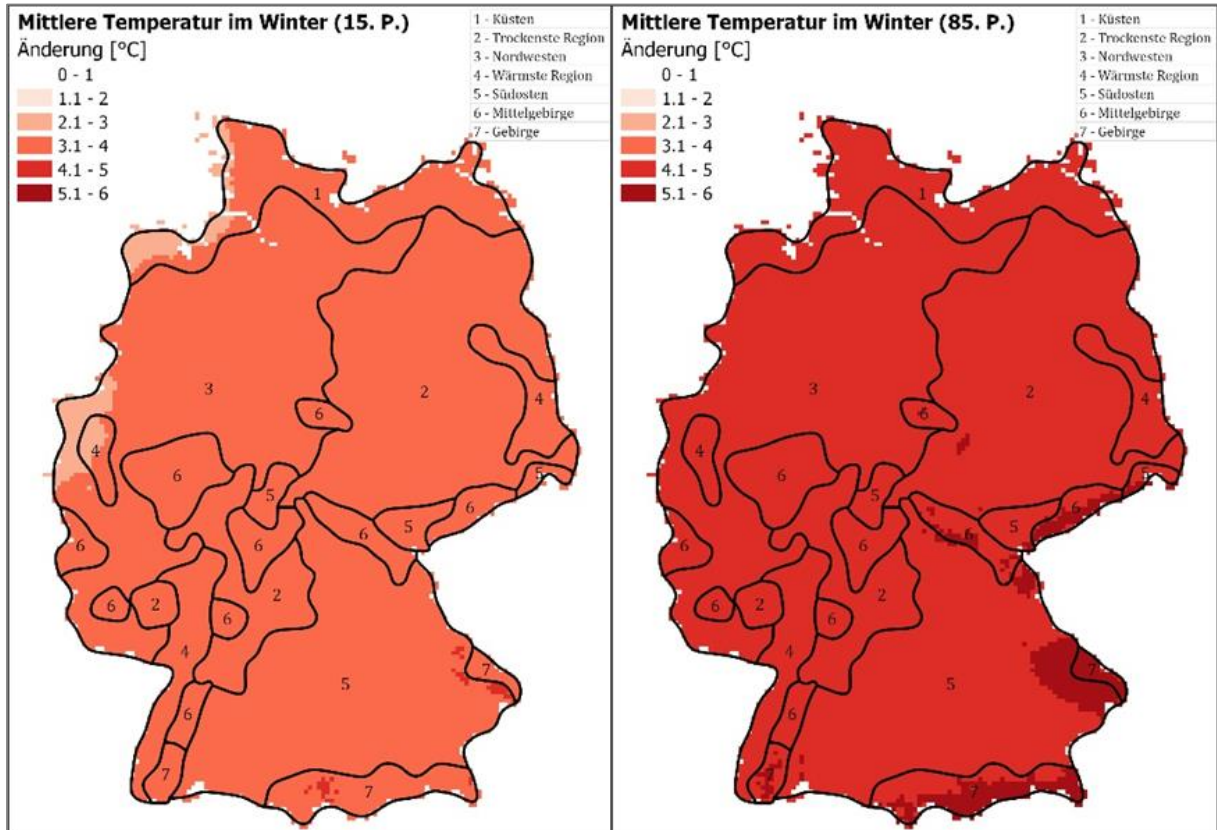

Quelle: eigene Darstellung, Eurac Research

Ein heterogeneres Bild zeigt sich bei den Projektionen der Änderungen des mittleren Niederschlags im Sommer. Die Abnahmen werden für den äußeren Westen Deutschlands als am höchsten berechnet mit besonders hohen Werten in Teilen des Schwarzwalds und des Hunsrücks. Zunahmen zeigen die Modellierungen für den Osten Deutschlands mit Spitzenwerten für die Insel Rügen und ein kleines Gebiet um Magdeburg (Abbildung 16).

**Abbildung 16: Projizierte Änderungen des mittleren jährlichen Niederschlags im Sommer (RCP 8.5) für das Ende des Jahrhunderts**

Linke Abbildung: 15. Perzentil, rechte Abbildung: 85. Perzentil.

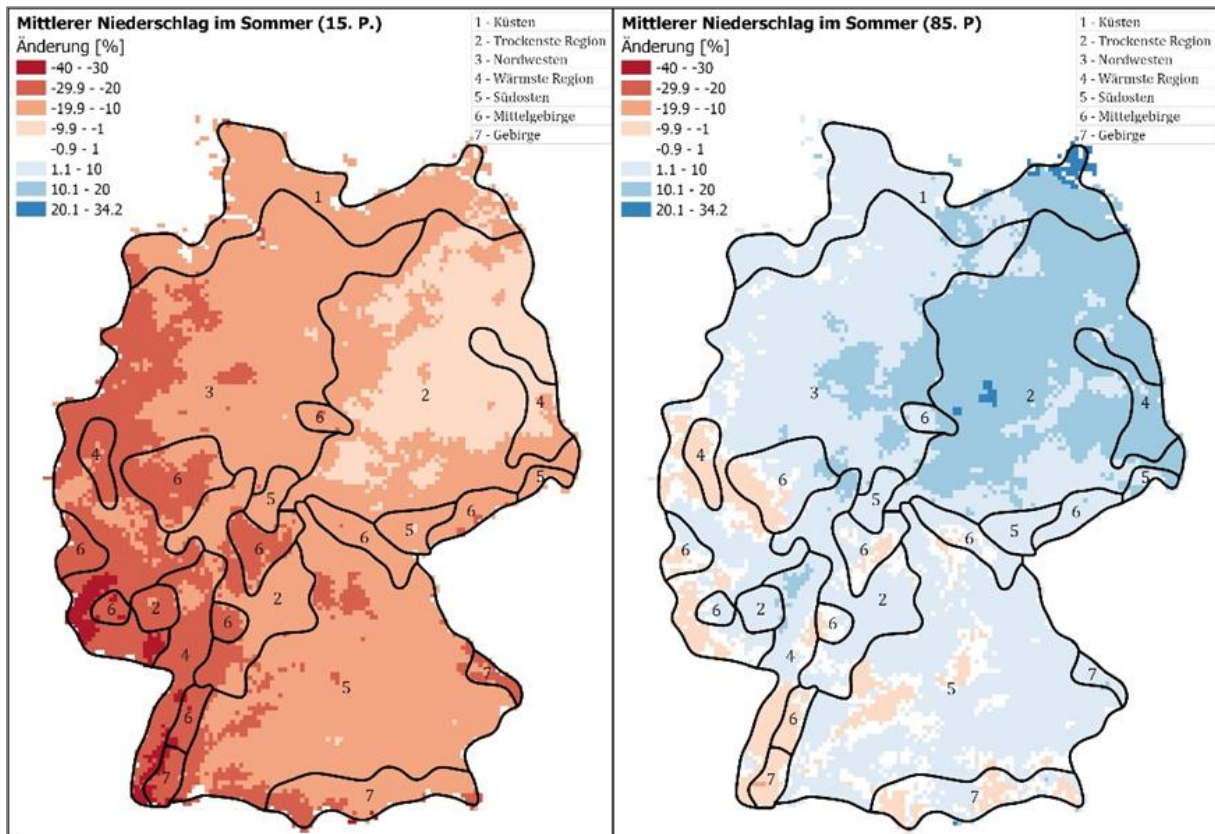

Quelle: eigene Darstellung, Eurac Research



Abbildung 17 zeigt, dass laut Projektionen der mittlere Niederschlag im Winter im 15. Perzentil in kleinen Teilen der Gebirge von geringen Abnahmen, in weiten Teilen des Landes von geringen Zunahmen gekennzeichnet ist. Im 85. Perzentil nimmt der Niederschlag in weiten Teilen Deutschlands mehr als 30 Prozent zu. Besonders hohe Zunahmen zeigen die Modellierungen für die Pfalz und den Schwarzwald.

**Abbildung 17: Projizierte Änderungen des mittleren jährlichen Niederschlags im Winter (RCP 8.5) für das Ende des Jahrhunderts**

Linke Abbildung: 15. Perzentil, rechte Abbildung: 85. Perzentil.

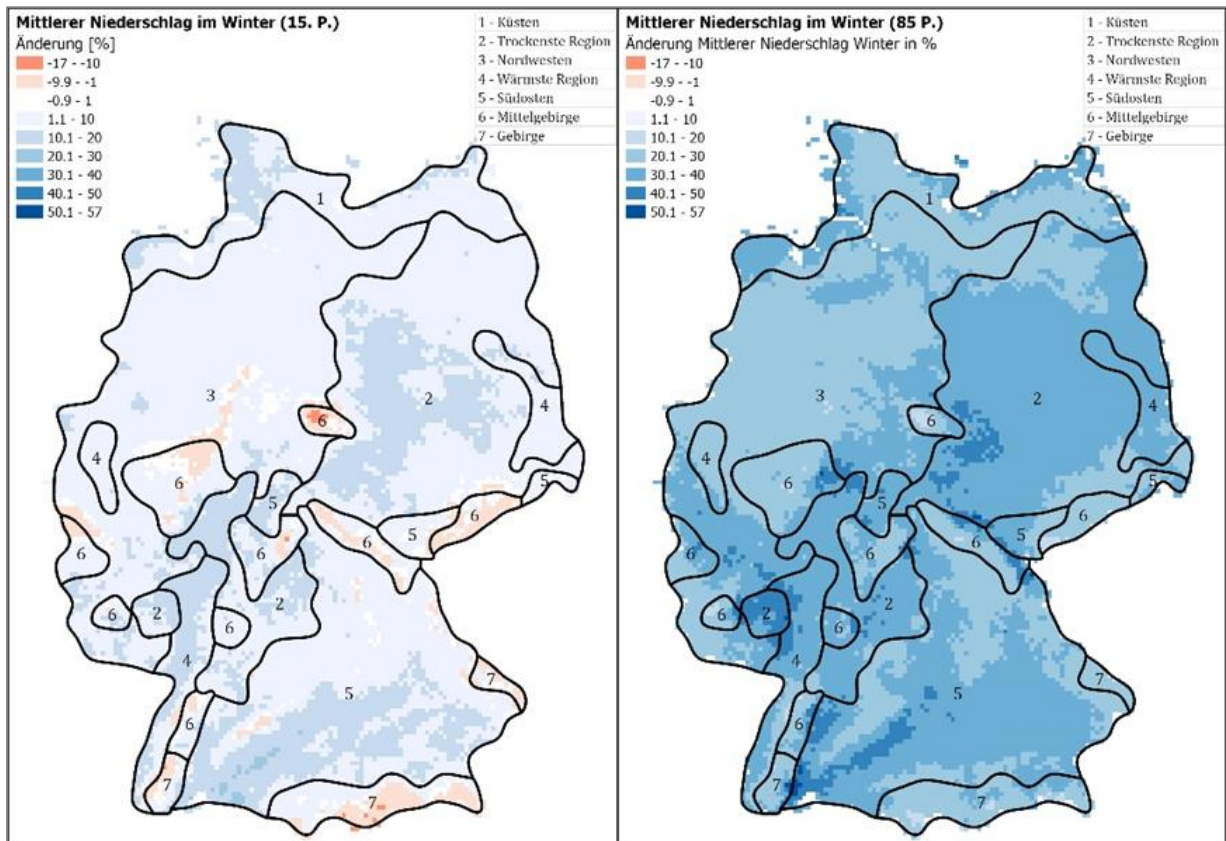

Quelle: eigene Darstellung, Eurac Research

Die Karte der Trockentage im Sommer zeigt im 85. Perzentil die größten Zunahmen in den Klimaraumtypen „Gebirge“ und „Mittelgebirge“. Von teilweise hohen Werten betroffen sind der äußerste Westen der „Küsten“ und ein kleiner Teil im Westen des „Nordwestens“. Im 15. Perzentil ist der Bereich der Ostseeküste von keiner Änderung betroffen und weite Bereiche der nördlichen Hälfte Deutschlands nur von sehr geringen Zunahmen an Trockentagen (Abbildung 18).

**Abbildung 18: Projizierte Änderungen der mittleren Anzahl der Trockentage im Sommer (RCP 8.5) für das Ende des Jahrhunderts**

Linke Abbildung: 15. Perzentil, rechte Abbildung: 85. Perzentil.

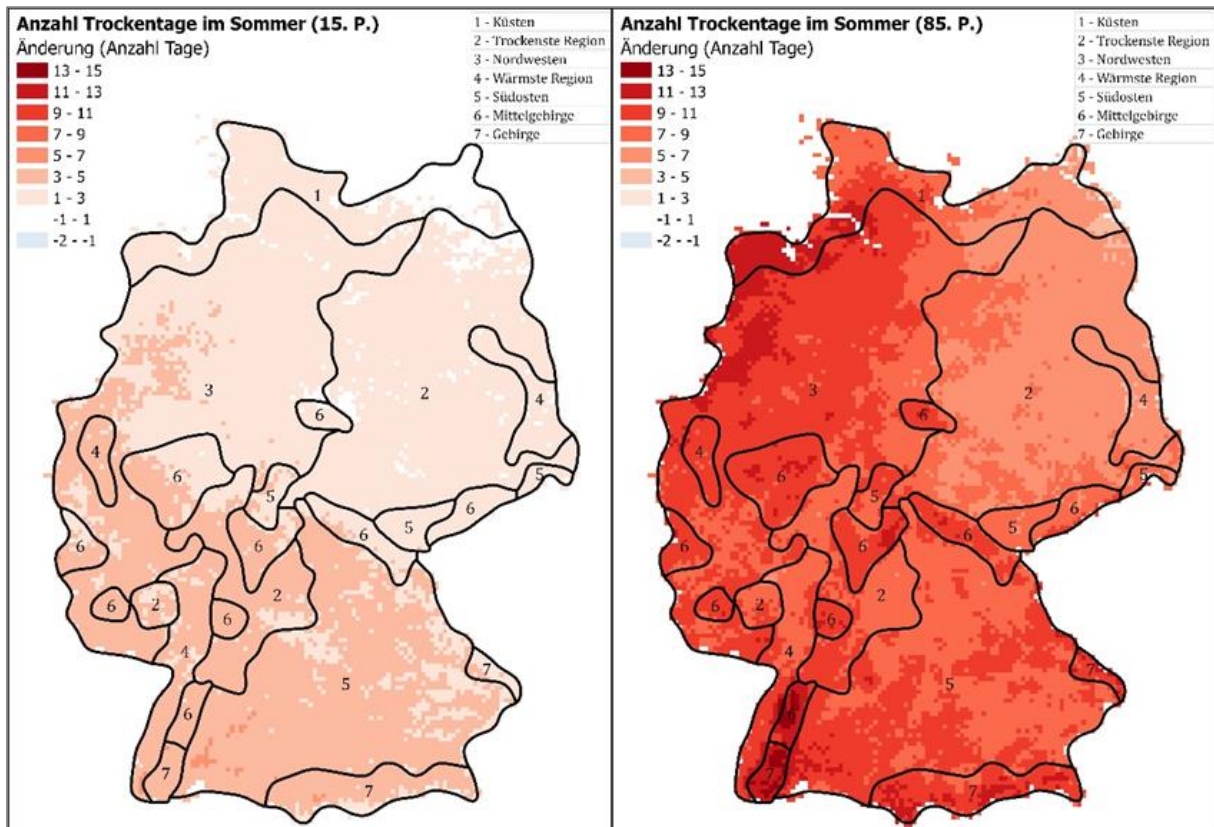

Quelle: eigene Darstellung, Eurac Research



Ein heterogenes Muster zeigt sich für die Projektionen der Anzahl der Trockentage im Winter. Im 15. Perzentil kommt es in ganz Deutschland zu einer leichten Abnahme an Trockentagen. Im 85. Perzentil kommt es zu leichten Zunahmen mit den Mittelgebirgen als am stärksten betroffene Gebiete. Keine Änderungen werden für Teile der Wärmsten Region, der Trockensten Region und den Südosten projiziert (Abbildung 19).

**Abbildung 19: Projizierte Änderungen der mittleren Anzahl der Trockentage im Winter (RCP 8.5) für das Ende des Jahrhunderts**

Linke Abbildung: 15. Perzentil, rechte Abbildung: 85. Perzentil.

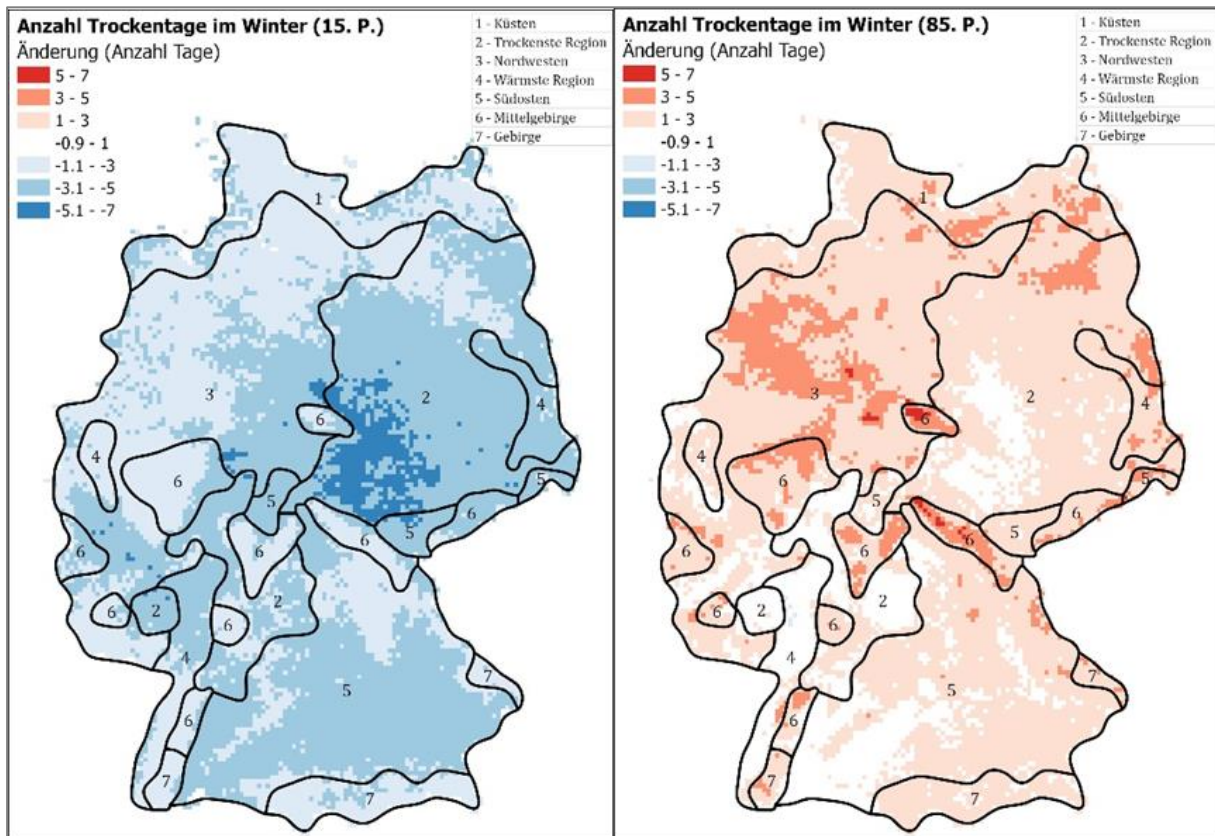

Quelle: eigene Darstellung, Eurac Research

Zunahmen an Starkniederschlägen werden im pessimistischen Fall insbesondere für die Gebirge und Mittelgebirge prognostiziert. Im optimistischen Fall sind vor allem der Südosten, die Mittelgebirge und der westliche Teil der Küsten von leichten Zunahmen betroffen (Abbildung 20).

**Abbildung 20: Projizierte Änderungen der mittleren Anzahl der Starkniederschlagstage (RCP 8.5) für das Ende des Jahrhunderts**

Linke Abbildung: 15. Perzentil, rechte Abbildung: 85. Perzentil.

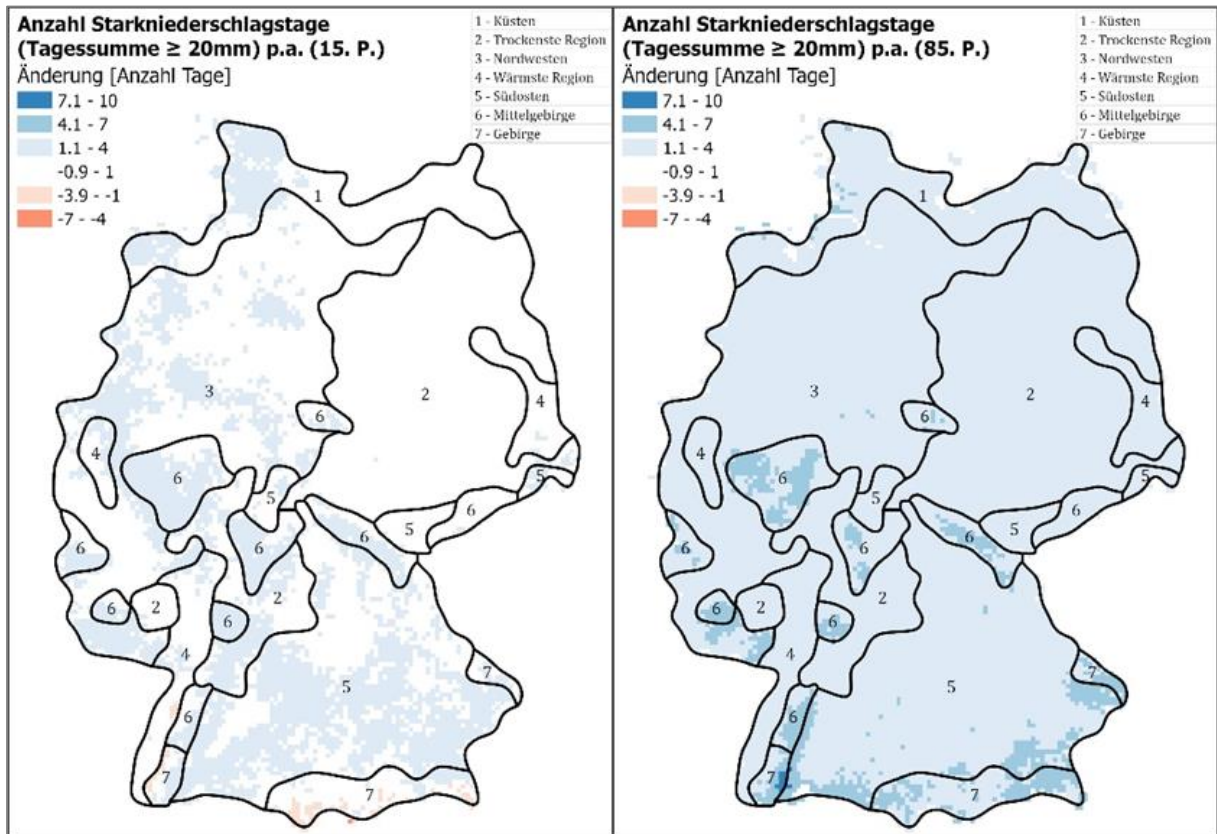

Quelle: eigene Darstellung, Eurac Research

In Abbildung 21 werden im 85. Perzentil insbesondere Zunahmen der extremen Windgeschwindigkeiten für die Mittelgebirge und die Gebirge projiziert, wobei die südlichen Alpen nicht betroffen sind. Im 15. Perzentil nehmen die extremen Windgeschwindigkeiten in ganz Deutschland ab mit den größten Abnahmen in den Allgäuer Alpen und dem Unterbayerischen Hügelland. Aussagen zu zukünftigen Entwicklungen von Windgeschwindigkeiten sind mit größeren Unsicherheiten verbunden. Insbesondere das Auftreten lokaler Starkwinde ist bisher aufgrund der Auflösung der vorhandenen Modelle nur begrenzt simulierbar. Teils werden hochaufgelöste Klimamodellläufe verwendet, die aber nicht biasadjustiert sind (Hänsel et al. 2020) (siehe Teilbericht 1, „Klimaprojektionen“).

**Abbildung 21: Projizierte Änderungen der mittleren täglichen extremen Windgeschwindigkeiten (RCP 8.5) für Ende des Jahrhunderts**

Linke Abbildung: 15. Perzentil, rechte Abbildung: 85. Perzentil.

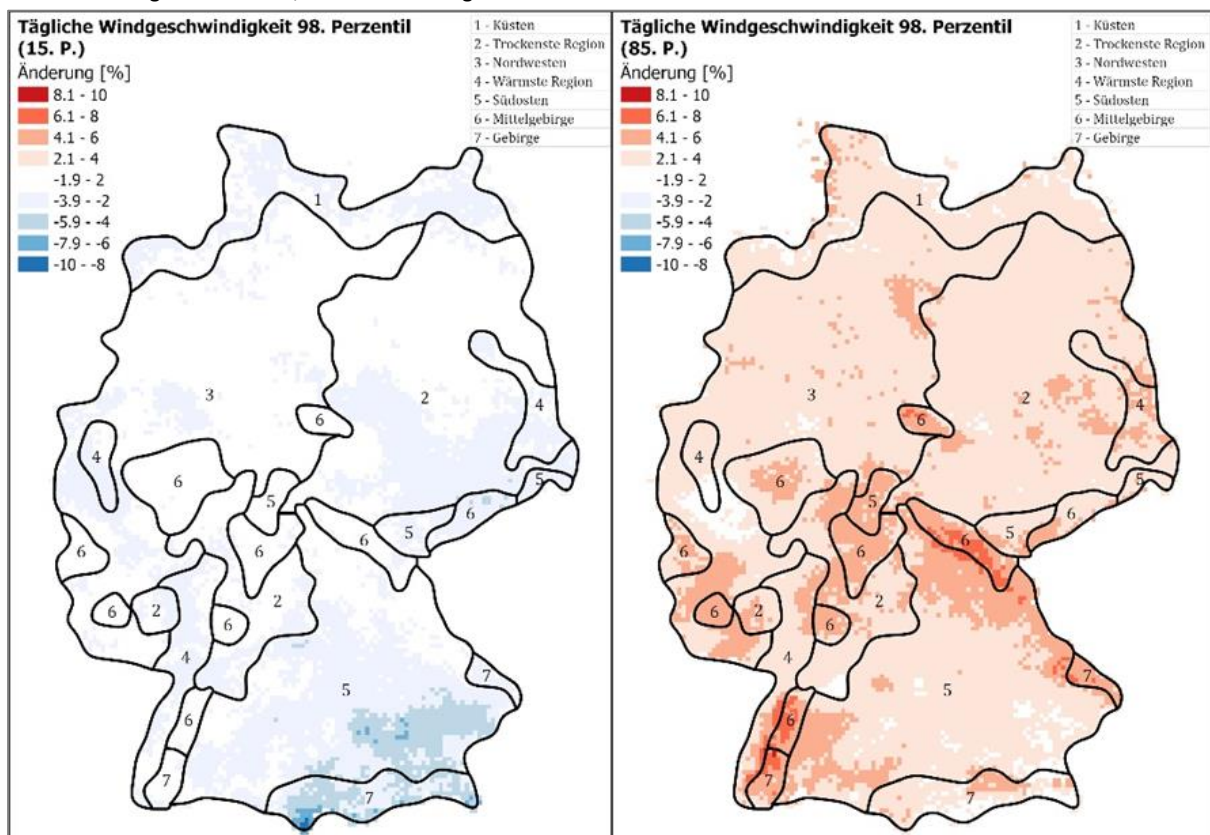

Quelle: eigene Darstellung, Eurac Research

## 4.3 Klimatische Hotspot-Karten

### 4.3.1 Grundlage, Methodik zur Erstellung der klimatischen Hotspot-Karten

Ziele der klimatischen Hotspot-Karten war i) jene Räume zu identifizieren, für die besonders extreme Werte sowie starke Klimaänderungen einzelner Klimavariablen projiziert werden und ii) unter Berücksichtigung der Ergebnisse der Klimarisikobewertungen vorwiegend vom Klimawandel betroffene Gebiete auszuweisen. Datengrundlage sind die unter Kapitel 4.1 genannten Klimaprojektionen für das Szenario RCP8.5. Es wurde stets der pessimistische Fall zugrunde gelegt, da hier ausdrücklich negative klimatische Einflussfaktoren werden sollten. Für den pessi-

mistischen Fall wurde das 85. Perzentil bei allen klimatischen Einflüssen mit Ausnahme des abnehmenden durchschnittlichen Niederschlags, für den das 15. Perzentil betrachtet wurde. Hydrologische und Ozeanographische Informationen sind nicht in die Analyse eingeflossen.

Entsprechend der handlungsfeldübergreifenden Auswertung wurden in der Hotspotanalyse jene klimatischen Einflüsse verwendet, die bei hohen Klimarisiken besonders häufig auftreten (siehe 3.1), mit Ausnahme der Starkwinde, da für diese keine Klimaprojektionen vorliegen, die ein robustes Änderungssignal erkennen lassen. Die anderen fünf vorrangigen klimatischen Einflüsse (Hitze, Trockenheit, durchschnittlicher Temperaturanstieg, durchschnittliche Niederschlagsabnahme, Starkregen) wurden mit Indikatoren unterlegt, für die entsprechende Berechnungen des Deutschen Wetterdienstes vorliegen:

- ▶ Mittlere Tagestemperatur [Grad Celsius]
- ▶ Heiße Tage [maximale Tagestemperatur über 30 Grad Celsius]
- ▶ Tropische Nächte [minimale Temperatur 20 Grad Celsius]
- ▶ Trockentage [Tagessumme des Niederschlags gleich 0 Millimeter]
- ▶ Mittlerer Tagesniederschlag, 15. Perzentil [Millimeter]
- ▶ Starkregentage [Tagessumme des Niederschlags größer als 20 Millimeter]

Zunächst wurden Hotspot-Karten für einzelne klimatische Einflüsse wie folgt erstellt. Für die Zukunft wurde für jeden Klimaparameter die extremsten 15 Prozent der Rasterzellen als Hotspot angezeigt (zum Beispiel die 15 Prozent trockensten oder wärmsten Rasterzellen). Dafür wurde für den pessimistischen Fall in der Mitte des Jahrhunderts für jeden der ausgewählten Indikatoren sowohl für die Absolut- als auch für Änderungswerte der Projektionen (im Vergleich zum Bezugszeitraum) das 85. Perzentil berechnet (beziehungsweise das 15. Perzentil für den abnehmenden mittleren Tagesniederschlag). Anschließend wurden jene Rasterzellen, die Werte größer als das 85. Perzentil (beziehungsweise das 15. Perzentil für den abnehmenden Niederschlag) haben, in Karten abgebildet. Der jeweilige Hotspot-Schwellenwert für die Mitte des Jahrhunderts wurde entsprechend für die Definition von Hotspots für das Ende des Jahrhunderts zugrunde gelegt (Abbildung 22).

Um Hotspots über alle ausgewählten klimatischen Einflüsse hinweg auszuweisen, wurden die sechs Hotspot-Karten aggregiert. Hierfür wurde eine Gewichtung der klimatischen Einflüsse entsprechend den Ergebnissen der Bewertung der Klimarisiken für die drei Zeitscheiben Gegenwart, Mitte und Ende des Jahrhunderts vorgenommen. Die klimatischen Einflüsse einer Klimawirkung mit einem geringen Klimarisiko wurden mit 1, mit einem mittleren Klimarisiko mit 2 und mit einem hohen Klimarisiko mit 3 gewichtet.

#### **4.3.2 Hotspot-Karten einzelner Klimasignale**

Die Karten zeigen für die mittlere Tagestemperatur Mitte des Jahrhunderts besonders heiße Gebiete hinsichtlich der Absolutwerte im Ober- und Niederrhein, in der Westfälischen Bucht, im Gebiet um Berlin und im Harz, entsprechend dem Klimaraumtyp „Wärmste Regionen“. Die größten Änderungswerte werden für die Mitte des Jahrhunderts für den Alpenraum und den Bayerischen Wald projiziert. Ende des Jahrhunderts hat ganz Deutschland die Schwellenwerte für die höchsten Absolutwerte (11,7 Grad Celsius) und für die größten Änderungen (plus 2,3 Grad Celsius) überschritten.

Der Schwellenwert für die Hotspots der Heißen Tage liegt für die Mitte des Jahrhunderts bei 21,1 Heißen Tagen, was den Oberrheingraben sowie Teile von Süd- und Südostdeutschland betrifft. Ende des Jahrhunderts liegt, bis auf den Küstenraum, ganz Deutschland über diesem Wert.



Der Schwellenwert für die größten Änderungen liegt bei 14,8 zusätzlichen Heißen Tagen für Mitte des Jahrhunderts und betrifft in Deutschland weitestgehend ähnliche Räume wie die Hotspots der Absolutwerte.

Gebiete, die in der Mitte des Jahrhunderts von einer besonders hohen Anzahl an tropischen Nächten gekennzeichnet sein werden, sind ähnlich den beiden vorangegangenen Indikatoren der Ober- und Unterrhein, der Harz, sowie als weitere Gebiete ein größeres Gebiet um Berlin und der äußerste Osten Deutschlands. Aufgrund des niedrigen Ausgangswerts im Bezugszeitraum sind die Schwellenwerte für Absolut- und Änderungswerte fast gleich und daher dieselben Gebiete betroffen.

Die oberen 15 Prozent der absoluten Anzahl der Trockentage beginnen ab einem Wert von 264 Tagen für die Mitte des Jahrhunderts. Besonders stark sind einige Teile Ostdeutschlands sowie punktuell der Oberrheingraben betroffen. Ende des Jahrhunderts dehnt sich die betroffene Fläche auf fast ganz Ostdeutschland, die Küsten und das Erzgebirge aus. Die Änderungen ergeben ein anderes Bild: Der Schwellenwert für die Änderung der Anzahl an Trockentagen liegt in der Mitte des Jahrhunderts bei plus 15,4 Tagen. Die stärksten Änderungen in der Mitte des Jahrhunderts werden weite Teile Westdeutschlands (das Rheingebiet, Westfalen) sowie das Thüringische Mittelgebirge und der Harz erfahren. Ende des Jahrhunderts dehnt sich das Gebiet auf ganz Westdeutschland und das Erzgebirge aus. Der Osten Deutschlands liegt weitestgehend unter dem Schwellenwert.

Bei dem abnehmenden mittleren Tagesniederschlag liegt der Schwellenwert der untersten 15 Prozent der Absolutwerte, also den trockensten Gebieten, in der Mitte des Jahrhunderts bei 575 Millimeter. In der Mitte wie am Ende des Jahrhunderts können weite Teile Ostdeutschlands besonders betroffen sein. Ein anderes Muster ergibt sich für die stärksten Änderungswerte. Besonders hohe relative Abnahmen betreffen in der Mitte des Jahrhunderts vor allem den oberen Rheingraben, die Eifel, das Niedersächsische Bergland sowie den Bayerischen Wald und das Erzgebirge. Ende des Jahrhunderts vergrößern sich die in der Mitte des Jahrhunderts gekennzeichneten Gebiete und es kommen Alpenraum und das Thüringische Becken hinzu.

Von einer besonders hohen Anzahl an Starkregentagen werden Mitte des Jahrhunderts die Gebirgsregionen betroffen sein. Das Änderungssignal ist in der Mitte des Jahrhunderts im Alpenraum und im Schwarzwald besonders stark und für das Ende des Jahrhunderts werden für fast ganz Westdeutschland, das Erzgebirge und die Ostseeküste hohe Werte projiziert.



**Abbildung 22: Hotspot-Karten der einzelnen Klimaindikatoren mit den extremsten 15 Prozent als Bezug für das Ende des Jahrhunderts**

Datengrundlage ist stets der pessimistische Fall und Szenario RCP8.5.

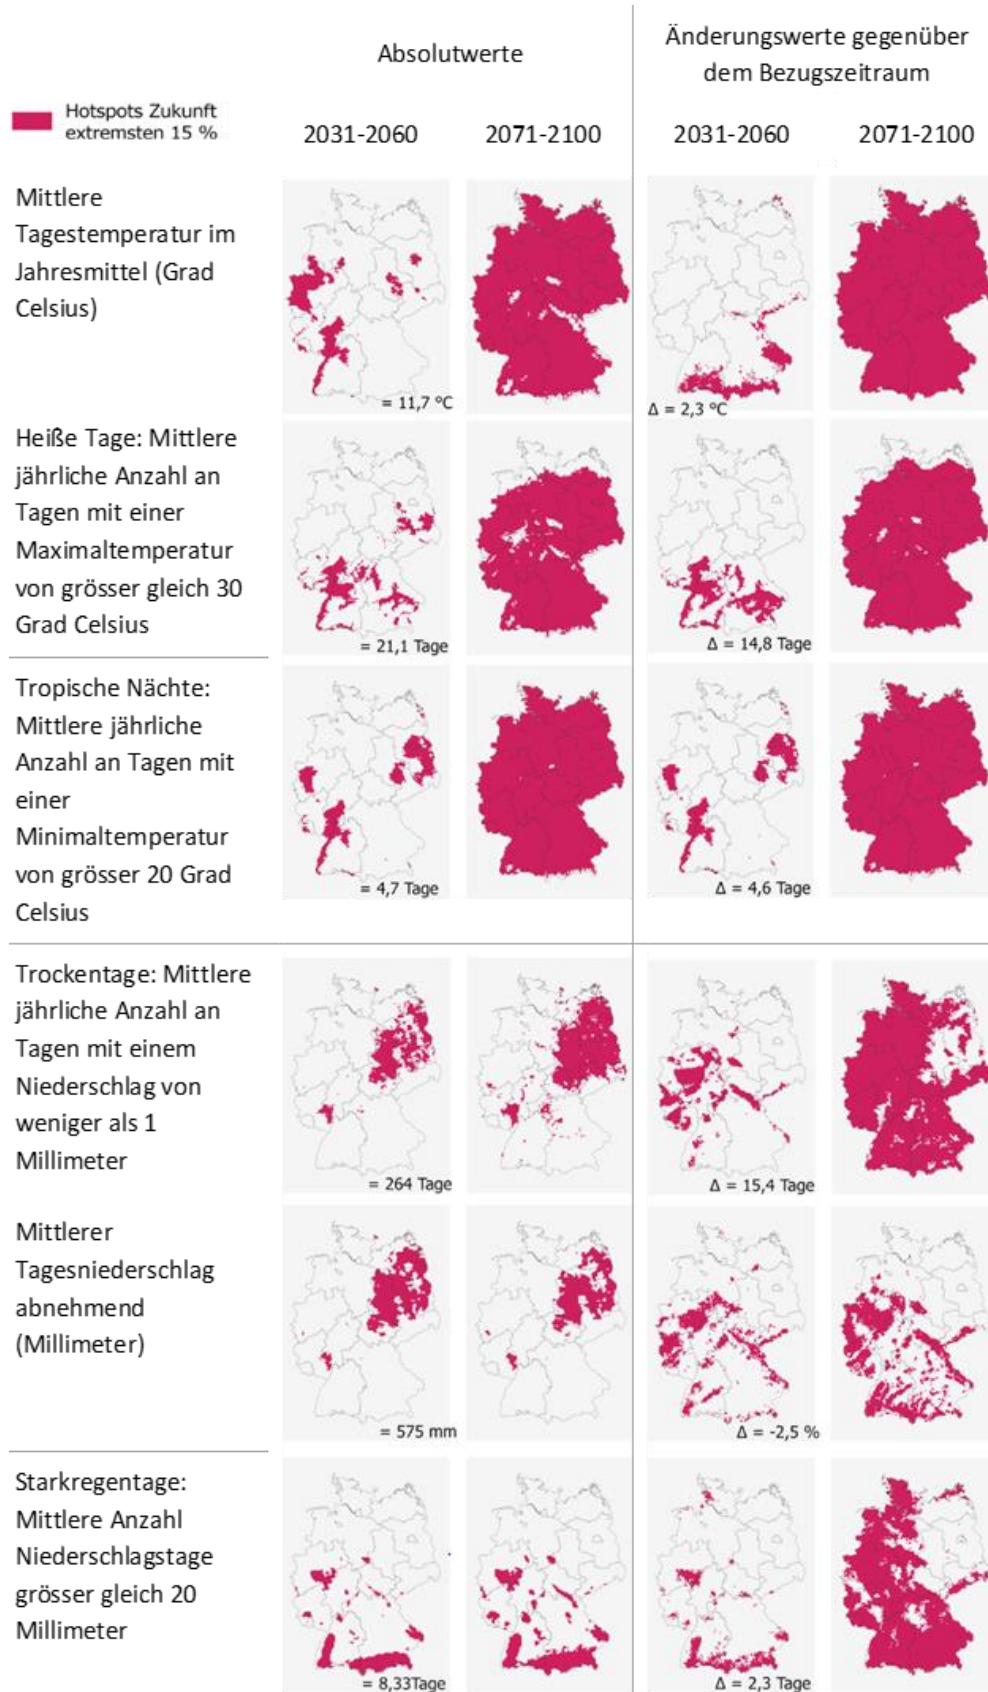

Quelle: eigene Darstellung, Eurac Research

### **4.3.3 Aggregierte klimatische Hotspot-Karten ausgewählter Klimaindikatoren für Mitte und Ende des Jahrhunderts**

Um das zweite Ziel, eine Ausweisung von klimatischen Hotspots über alle für Deutschland wichtigsten Klimarisiken hinweg darzustellen, wurden die Einzelindikatoren entsprechend der Auswertung gewichtet und für die Mitte und Ende des Jahrhunderts für die Absolutwerte und Änderungswerte aggregiert. Es ist hervorzuheben, dass aggregierter Hotspot nicht bedeutet, dass die hohen Werte einzelner Klimaindikatoren gleichzeitig auftreten. Aggregierter Hotspot heißt vielmehr, dass für mehrere klimatische Einflüsse unter Szenario RCP8.5 und dem 85. Perzentil der Modellberechnungen (beziehungsweise dem 15. Perzentil beim Indikator abnehmender mittlerer Niederschlag) für 30-jährige zukünftige Zeitscheiben die deutschlandweit relativ gesehen höchsten mittleren Änderungen in Absolut- beziehungsweise Änderungswerten projiziert werden.

**Abbildung 23: Gewichtet-aggregierte Hotspots der sechs Klimaindikatoren für Mitte und Ende des Jahrhunderts; Absolut- und Änderungswerte**

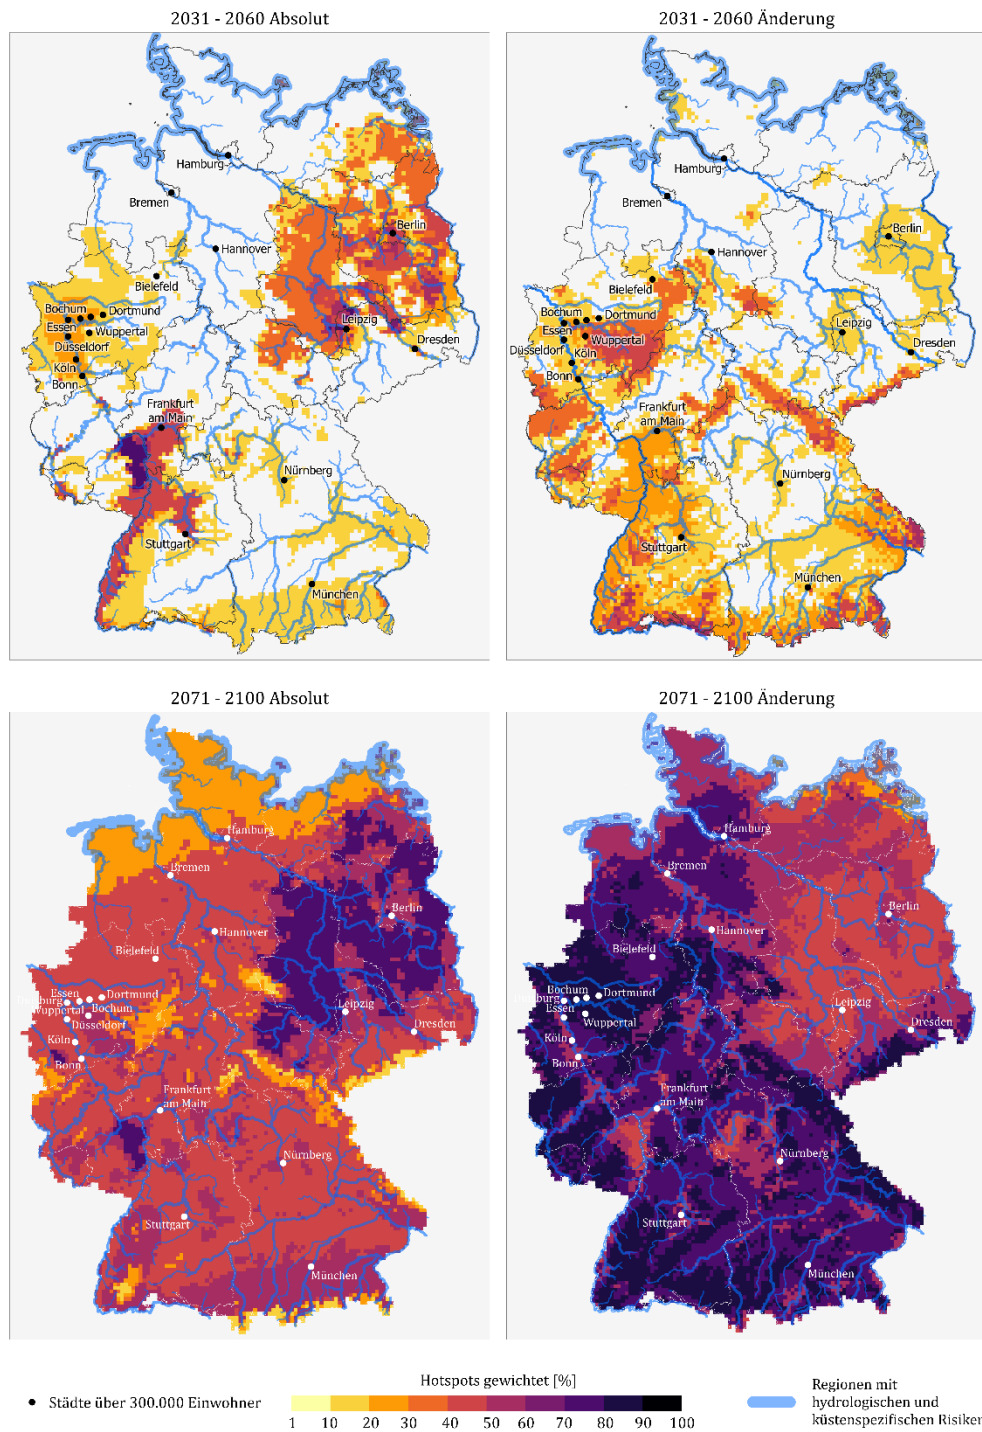

Links (Absolutwerte): Regionen, die von besonders vielen klimatischen Extremen betroffen sein könnten;  
 Rechts (Änderungswerte): Regionen, die von besonders hohen Veränderungen der Klimaparameter betroffen sein könnten.  
 100 Prozent bedeutet maximale Betroffenheit, also Überschreiten der Schwellenwerte bei allen betrachteten Klimaparametern. Berücksichtigt wurden die Klimaparameter hohe mittlere Jahrestemperatur, Anzahl Heißer Tage, Anzahl tropischer Nächte, geringer Jahresniederschlag, Anzahl trockener Tage, Tage mit Starkregen sowie die Bedeutung, die diese Klimaparameter für alle untersuchten Klimawirkungen haben.  
 Datengrundlage: 85. Perzentil des aufbereiteten DWD-Referenz-Ensemble v2018 (Brienen et al. 2020) für das RCP8.5-Szenario des IPCC AR5 (IPCC 2013)

Quelle: eigene Darstellung, Eurac Research

Interessant bei den aggregierten klimatischen Hotspot-Karten in Abbildung 23 sind die unterschiedlichen räumlichen Muster der projizierten Absolut- und Änderungswerte. Zur Mitte des Jahrhunderts weist der obere Rheingraben, der Niederrhein und, bis auf die Ostseeküsten und das Erzgebirge, fast ganz Ostdeutschland viele hohe Absolutwerte der nach Bedeutung der Klimawirkung gewichteten sechs Indikatoren auf. Zum Ende des Jahrhunderts ist von diesen sechs Klimaindikatoren fast ganz Deutschland ähnlich stark betroffen, wobei besonders viele Hotspots im Osten Deutschlands und dem Rhein-Main-Tiefland liegen. Ein anderes Bild zeigt sich bei den projizierten Änderungen. In der Mitte des Jahrhunderts zeichnen sich viele hohe Änderungen der sechs aggregierten und gewichteten Klimaindikatoren vor allem in den Gebirgsregionen Deutschlands sowie im Rheingebiet ab. Der Osten Deutschlands ist kaum betroffen. Zum Ende des Jahrhunderts ist nahezu ganz Westdeutschland von hohen Änderungswerten gekennzeichnet. Im Osten Deutschlands sticht das Erzgebirge hervor.

#### **Kernaussagen zu den räumlichen Mustern**

- ▶ Zur Mitte des Jahrhunderts befinden sich klimatische Hotspots insbesondere im Süden, Südwesten und Osten Deutschlands. Verschiedene urbane Agglomerationsräume sind deutlich betroffen.
- ▶ Zum Ende des Jahrhunderts werden die klimatischen Hotspots deutlich intensiver und dehnen sich stark aus.
- ▶ Zum Ende des Jahrhunderts finden sich besonders viele klimatische Hotspot-Regionen in Süddeutschland und im Westen, betroffen ist aber faktisch das gesamte Bundesgebiet.

## 5 Gesamtbetrachtung der Klimarisiken mit Anpassung

Autoren: Luise Porst, Walter Kahlenborn | adelphi, Berlin

### 5.1 Übersicht der Anpassungskapazität

Nach der Bewertung des Klimarisikos ohne Anpassung erfolgte die fachliche Analyse der Anpassungskapazität für 33 ausgewählte Klimarisiken und für alle 13 Handlungsfelder. Ausgewählt wurden die Klimarisiken, die durch das Behördennetzwerk für die Gegenwart und/oder für die Mitte des Jahrhunderts im pessimistischen Fall als „hoch“ eingeschätzt wurden. Klimarisiken, deren Bewertung erst zum Ende des Jahrhunderts „hoch“ ausfiel, wurden dann in die Untersuchung der Anpassungskapazität einbezogen, wenn sich aus der Analyse der Klimawirkungen ableiten ließ, dass die betroffenen Systeme sehr lange Anpassungsdauern aufweisen und (dringliche) Anpassungsmaßnahmen gegebenenfalls schon jetzt einsetzen müssen.

Unabhängig davon erfolgte auch eine Betrachtung der Anpassungskapazität auf generischer Ebene, einschließlich der Beiträge der Querschnittsfelder Bevölkerungsschutz, Raumordnung, Finanzwirtschaft, die zum Teil selbst direkt oder sekundär von den Folgen des Klimawandels betroffen sind, aber durch deren Aktivitäten Anpassungskapazitäten in den anderen Handlungsfeldern auch erhöht werden können. Die Analyseergebnisse zu generischen Anpassungskapazitäten in den Querschnittsfeldern wurden auch bei der Bewertung der Anpassungskapazität der ausgewählten Klimawirkungen und der Handlungsfelder berücksichtigt (siehe unten).

Wie im Kapitel zur Methodik erläutert, werden zwei Möglichkeitsräume von Anpassungskapazität angenommen: die beschlossenen Maßnahmen und die weiterreichende Anpassung. Mit Blick auf diese beiden Fälle wurde Anpassungskapazität analysiert und bewertet, inwieweit sie ausreicht, um Klimawandelrisiken (substantiell) zu reduzieren. Für die Beschreibung und Bewertung der beschlossenen Maßnahmen wurde der Aktionsplan Anpassung (APA) III der Deutschen Anpassungsstrategie (DAS) zugrunde gelegt und in Ausnahmefällen wurden weitere Planungsdokumente berücksichtigt. Diese Maßnahmen liegen fast nur in der Zuständigkeit des Bundes. Es wird davon ausgegangen, dass diese unter aus heutiger Sicht plausiblen Bedingungen umgesetzt werden. Weiterreichende Anpassung umfasst Klimaanpassungsmaßnahmen, die die beschlossenen Maßnahmen einschließen und über diese hinausgehen. Sie können unter den angenommenen sozioökonomischen Entwicklungen und gegenwärtigen politischen Rahmenbedingungen als plausibel angesehen werden. Unter weiterreichender Anpassung werden auch andere Akteure als diejenigen auf Bundesebene berücksichtigt.<sup>22</sup> Die Wirksamkeit der Anpassung wird in fünf Stufen eingeschätzt: *gering*, *gering-mittel*, *mittel*, *mittel-hoch* und *hoch*. Der Wert „gering“ würde das angenommene Klimarisiko ohne Anpassung nicht reduzieren, „gering-mittel“ würde eine Reduzierung um eine halbe Stufe bedeuten, „mittel“ um eine Stufe und so weiter (siehe Teilbericht 1, „Konzept und Methodik“). Die Einschätzung der Wirksamkeit der Anpassung wurde separat für den Zeitraum 2020 bis 2030 und für die Mitte des Jahrhunderts (2031 bis 2060) und dabei für den optimistischen und den pessimistischen Fall<sup>4</sup> vorgenommen.

#### **Generische Anpassungskapazität und Beiträge der Querschnittshandlungsfelder Bevölkerungsschutz, Raumordnung und Finanzwirtschaft zur Anpassungskapazität**

##### **Generische Anpassungskapazität**

Unter generischer Anpassungskapazität werden im Rahmen der KWRA 2021 allgemeine anpassungsrelevante Faktoren und Rahmenbedingungen für Anpassung in Deutschland verstanden.

---

<sup>22</sup> Das methodische Vorgehen bei der Analyse und Bewertung der Anpassungskapazität ist im Kapitel zur Methodik der KWRA 2021 umfassend beschrieben (Teilbericht 1, „Konzept und Methodik“).



Um diese zu erfassen, wurden Indikatoren ausgewählt, für die räumlich differenzierbare quantitative Daten verfügbar waren (auf Landkreis- oder Bundeslandebene für ganz Deutschland). Die Auswahl der Indikatoren orientierte sich an den sechs Anpassungsdimensionen (Wissen, Motivation und Akzeptanz, Technologie und natürliche Ressourcen, Finanzielle Ressourcen, Institutionelle Strukturen und personelle Ressourcen, Rechtliche Rahmenbedingungen und politische Strategien), sodass sich die herangezogenen Datensätze letztlich auf grundlegende strukturelle, sozioökonomische Kennzeichen beziehen. Wenngleich die Verfügbarkeit passender, das heißt hinsichtlich Anpassungskapazität tatsächlich aussagekräftiger und räumlich aufgelöster Daten (auf Bundesebene/für Deutschland insgesamt) beschränkt ist, lassen sich aus dieser quantitativen Analyse annäherungsweise Hinweise auf grundsätzliche Voraussetzungen für die Verwirklichung von Anpassung ableiten. Erkennbar sind die drei folgenden (groben) räumlich-strukturellen Muster förderlicher beziehungsweise weniger förderlicher Voraussetzungen: Erstens besteht hinsichtlich der wirtschaftlichen und wissens-/technologiefördernden Dynamiken ein Süd-Nord-Gefälle. Betrachtet wurde hier die Anzahl der in forschungs- und wissensintensiven Industrien beschäftigten Einwohner (Dimension „Wissen“) und Investitionen im verarbeitenden Gewerbe (Dimension „Technologie und natürliche Ressourcen“). Beides zeigt geringere Werte in norddeutschen Bundesländern beziehungsweise Landkreisen (gegenüber denjenigen im Süden Deutschlands). Zweitens zeichnet sich ein West-Ost-Gefälle bei der finanziellen Ausstattung – ausgehend von Bruttoinlandsprodukt und gemeindlicher Steuerkraft – ab. Dies lässt auf tendenziell ungünstigere Voraussetzungen zur Bewältigung mit Anpassung einhergehender finanzieller Herausforderungen im östlichen Teil Deutschlands schließen. Demgegenüber sind hinsichtlich der Dimension Technologie und natürliche Ressourcen, zumindest ausgehend von Daten zu öffentlichen Ausgaben für Wissenschaft, Forschung und Entwicklung pro Einwohner, in östlichen Bundesländern vergleichsweise günstige Voraussetzungen festzustellen. Drittens ist ein Stadt-Land-Gefälle hinsichtlich finanzieller Ressourcen und Wissen auf struktureller Ebene erkennbar, zumindest gemessen an Bruttoinlandsprodukt beziehungsweise Hochschulabschlüssen.

### **Raumordnung**

Klimaanpassung ist im Raumordnungsgesetz und in den Leitbildern der Raumordnung (auf Bundesebene) verankert. Die konkrete planerische Berücksichtigung der Erfordernisse der Klimawandelanpassung erfolgt auf Ebene der Regionalplanung und der Bauleitplanung. Anpassungsrelevante Festlegungen gewannen in den vergangenen zehn Jahren in der Regionalplanung bereits an Bedeutung, insbesondere hinsichtlich des vorbeugenden Hochwasserschutzes in Flussgebieten (Sicherung von Retentionsflächen), des Küstenschutzes und Erhalts der Wasserressourcen sowie der Minderung thermischer Belastung in Verdichtungsräumen. Auch zur Verschiebung der Lebensräume von Tieren und Pflanzen treffen die meisten Regionalpläne bereits Festlegungen (Knieling et al. 2013; Schmitt 2016; Knieling et al. 2018; Ahlhelm et al. 2020).

Anhand der Ergebnisse der im Rahmen der KWRA durchgeführten Erhebung unter Regionalplanungsbeauftragten zur Berücksichtigung von Klimawandelanpassung regionalen Planwerken (siehe Teilbericht 1, Kapitel 5.2) lässt sich dies noch konkretisieren. Bisher richtet sich der Fokus regionalplanerischer Festlegungen vornehmlich auf folgende inhaltliche Schwerpunkte aus den Handlungsfeldern der Raumordnung, welche Relevanz für die Klimawandelanpassung haben: die Sicherung von Überschwemmungsbereichen als Retentionsräume, die Steuerung der Siedlungs- und Infrastrukturentwicklung sowie der Schutz klimawirksamer Freiräume. Auch Risikovorsorge in Überflutungsbereichen und die Minimierung weiterer Zerschneidung von Lebensräumen finden vergleichsweise häufig Berücksichtigung bei der Festlegung von Vorbehalts- und Vorrangflächen. Darüber hinaus ergab besagte Erhebung, dass das Augenmerk regionalplanerischer Aktivitäten auch auf anpassungsrelevante Themen wie die Sicherung zusammenhän-

gender Netze ökologisch bedeutsamer Freiräume und die verstärkte Sicherung von Wasserressourcen gerichtet ist, wobei, im Unterschied zu den vorher genannten Themen, verstärkt informelle Instrumente der Regionalplanung zum Einsatz kommen. Im Rahmen ihres Instrumentariums kann die Regionalplanung also durchaus zur Klimaanpassung in Deutschland beitragen. Konkret wird Klimaanpassung bereits in über drei Viertel der beteiligten Regionen<sup>23</sup> in Zielen, Grundsätzen oder Hinweisen der Regionalpläne (formelle Instrumente) Rechnung getragen oder ist dies geplant. Und in etwas mehr als der Hälfte der beteiligten Regionen sind klimaanpassungsrelevante Themen über informelle Instrumente<sup>24</sup> in Planungsprozessen berücksichtigt oder ist dies geplant.

Grundsätzlich bestehen regionalplanerische Beiträge zur Klimaanpassung also in der Ausweisung, Freihaltung oder Sicherung von Flächen für Nutzungen, durch die Schadenspotenziale und Klimarisiken reduziert werden, insbesondere hinsichtlich Ökosystemen (Wald, Boden, Biodiversität, terrestrische, aquatische Lebensräume), Hochwasserschutz und Infrastrukturen (Verkehrsflächen, Siedlungsflächen). Nichtsdestotrotz wird es überwiegend als weiterhin erforderlich erachtet, die Berücksichtigung von Klimaanpassung in Regionalplanungsprozessen auszubauen, beispielsweise indem Klimaanpassung ein expliziter Abwägungsgrund würde beziehungsweise Klimaanpassung als Abwägungsgrund gestärkt würde. Angesichts der für die Zukunft in Deutschland angenommenen Klimarisiken besteht insbesondere Bedarf an der Abwägung von Nutzungen natürlicher Ressourcen (Wasser, Boden) und vorhandener Flächen, was über die Regionalplanung koordiniert und gesteuert werden kann.

Auf Ebene der Bauleitplanung wirken sich insbesondere die beiden Novellen zum Baugesetzbuch (2011, 2013) stärkend auf die Umsetzung von Klimaanpassung aus, da diese die Begründbarkeit klimaanpassungsrelevanter Darstellungen und Festsetzungen in Bauleitplänen und deren Durchsetzung gegenüber anderen Belangen erleichtern. Beiträge der Bauleitplanung zur Klimafolgenanpassung gehen insbesondere von Festsetzungsmöglichkeiten in den Plänen beziehungsweise von der Verfolgung bestimmter Ziele auf Ebene der Bauleitplanung aus. Dazu zählen die Reduzierung von Flächeninanspruchnahme und Bodenversiegelung, der Erhalt und die Sicherung von Biotopverbundsystemen, die Förderung zusammenhängender Netze ökologisch bedeutsamer Freiräume sowie Wasserrückhalt in der Fläche und dezentrale Regenwasserbewirtschaftung (für den Umgang mit Starkniederschlägen, aber auch Trockenheit). Weiterhin bestehen anpassungsrelevante Festsetzungen in der Sicherung von Verkehrsflächen und der Verlegung oder Aufgabe vulnerabler Verkehrsinfrastruktur, in Baubeschränkungen in überschwemmungs- und stark hitzegefährdeten Bereichen beziehungsweise der Rücknahme bereits bestehender Flächenausweisungsrechte, in Dach- und Fassadenbegrünungen, der Sicherung von Luftleitbahnen sowie der Aufrüstung von Hochwasserschutzanlagen.

### **Bevölkerungsschutz**

Die zentrale Aufgabe des Bevölkerungsschutzes ist die Bewältigung von aktuellen und die bestmögliche Vorbereitung auf zukünftige Schadensereignisse, zu denen auch klimatisch bedingte extreme Wetterereignisse gehören. Hierbei sind Bewältigungs-<sup>25</sup> und Anpassungskapazität eng miteinander verknüpft, wobei die Bewältigung in diesem Kontext als Vorstufe zur Anpassung

---

<sup>23</sup> n= 58 (von insgesamt 107 Regionalplanungseinheiten in Deutschland)

<sup>24</sup> dazu zählen die Erstellung Regionaler Entwicklungskonzepte, die Mitwirkung an Regionalkonferenzen, die Entwicklung räumlicher Leitbilder und Szenarien, Beratung, Moderation von regionalen Prozessen, vertragliche Vereinbarungen, informelle Fachplanungen wie Klimaschutz- und Klimaanpassungskonzepte.

<sup>25</sup> Bewältigungskapazität wird definiert als das Vermögen, vorhandene Ressourcen und Fähigkeiten zu nutzen, um die Einwirkungen eines katastrophalen Ereignisses kurz- bis mittelfristig zu mindern beziehungsweise zu vermeiden (UNDRR 2004).

verstanden werden kann. So können beispielsweise Einsatzerfahrungen eine verbesserte Vorbereitung auf zukünftige Schadensereignisse ermöglichen. Ein zentraler Beitrag des Bevölkerungsschutzes zur Anpassung ist daher, basierend auf Einsatzerfahrungen und dem Wissen zu Einsatzabläufen, die Zusammenarbeit mit anderen Akteursgruppen zur Entwicklung und/oder Planung von Anpassungsmaßnahmen. Dies bezieht sich insbesondere auf Schadensfälle, die durch extreme Wetterereignisse wie Hitzewellen, Dürreperioden, Starniederschläge, Flusshochwasser oder Stürme ausgelöst wurden. Konkret können Austausch von Feuerwehren und Rettungsdiensten unter anderem mit kommunalen Behörden und Infrastrukturbetreibern eine wichtige Anpassungsunterstützung darstellen. Auch Leitfäden zur Identifizierung geeigneter Anpassungsmaßnahmen oder Verhaltensempfehlungen, zum Beispiel für Hitzewellen, welche von den Organisationen des Bevölkerungsschutzes erstellt werden, können zur Anpassung beitragen. Zukünftige Beiträge des Bevölkerungsschutzes zur Klimaanpassung könnten sich im Hinblick auf eine verstärkte Nutzung der Einsatzerfahrungen über die kommunale Ebene hinaus auf Grundlage einer verbesserten Datenlage ergeben. Hierfür wird eine höhere Kompatibilität der bundesweit verwendeten Erfassungssysteme und der erhobenen Einsatzinformationen benötigt. Weiterhin kann eine Fortführung und Verstärkung der Kommunikation mit der Öffentlichkeit über Klimarisiken und Möglichkeiten zur Erhöhung des Selbstschutzes durch zielgruppenspezifische Kommunikationsmaterialien zukünftig zur Stärkung der Anpassungskapazität beitragen.

### **Finanzwirtschaft**

Die Institutionen der Finanzwirtschaft sind wichtige Akteure zur Lenkung und Verwaltung von Kapitalströmen und sind dementsprechend auch für die Finanzierung von Klimaanpassungsmaßnahmen von großer Bedeutung. Beiträge zur Klimaanpassung ergeben sich sowohl für die Banken- wie auch für die Versicherungswirtschaft. Zudem können sich durch die Eigenschaft von Banken und Versicherungen als institutionelle Investoren Beiträge dadurch ergeben, indem Kapital in Anpassungsprojekte investiert wird.

Die Versicherungswirtschaft leistet mit ihren Produkten grundsätzlich einen Beitrag zum gesellschaftlichen Risikotransfer. Versicherungspolice erfassen Risiken, wie etwa das Risiko möglicher Elementarschäden an einem Gebäude, und führen im Schadensfall zu einer Transferierung der Kosten. Versicherungen können sich beispielsweise auf das Risiko klimabedingter Ertragsausfälle in der Landwirtschaft, Schäden durch Waldbrände oder Stürme in der Forstwirtschaft oder Schäden an Gebäuden aufgrund von Hochwasserereignissen beziehen. Die von Versicherern zur Risikoprojektion verwendeten Modelle zur Quantifizierung von Klimarisiken können zudem als Planungsgrundlage, zum Beispiel für die Festlegung von Hochwasser-Risikozonen im Rahmen der Stadtplanung verwendet werden. Aufklärungskampagnen und Verhaltensempfehlungen wie etwa von Krankenversicherungen können einen Beitrag zur Steigerung des Risikobewusstseins innerhalb der Bevölkerung leisten.

Die Bankenwirtschaft kann durch die Vergabe von Krediten und Förderzuschüssen in allen Handlungsfeldern einen Beitrag zur Anpassung leisten. Zudem bündeln Banken zunehmend in Finanzprodukten wie Green Bonds privates Kapital zur Investition in Anpassungsmaßnahmen. Förderbanken bieten Förderprogramme für Klimaanpassungs-Projekte an oder können in ihrer Rolle als Investoren die Anpassung an den Klimawandel unterstützen.

In Zukunft kann die Finanzwirtschaft unter anderem durch die Bereitstellung von fachspezifischem Wissen zur Planung von Anpassungsmaßnahmen einen Beitrag zur Anpassung leisten. Für die Versicherungswirtschaft ergeben sich zukünftige Beiträge in der Weiterentwicklung des bestehenden Versicherungsangebots, wie etwa in der Landwirtschaft, oder der Konzeption neuer Versicherungslösungen, welche beispielsweise den Erhalt von Ökosystemen und deren Anpassungsleistungen unterstützen können. Zusätzlich können Versicherungen den Abschluss

von Versicherungspolicen an bestimmte Standards zur Anpassung knüpfen und Förderbanken in ihren Maßnahmenpaketen Anpassungsstandards für Akteure der Privatwirtschaft setzen.

### **Ebene der Handlungsfelder**

Für die Mitte des Jahrhunderts wird das Anpassungspotenzial der beschlossenen Maßnahmen (APA III) im optimistischen Fall (also im Falle einer günstigen Kombination aus Klimaszenario und sozioökonomischem Szenario) in fast allen Handlungsfeldern als gering-mittel eingeschätzt, in den Handlungsfeldern „Verkehr, Verkehrsinfrastruktur“ sowie „Menschliche Gesundheit“ sogar als mittel (siehe Tabelle 21, auch für die folgenden Aussagen). Gegenüber dem Zeitraum bis 2030 wird damit bei einem größeren Teil der Handlungsfelder eine Steigerung der Wirksamkeit der beschlossenen Maßnahmen (APA III) gesehen, insbesondere im Cluster Land, aber auch in den bereits genannten Handlungsfeldern „Verkehr, Verkehrsinfrastruktur“ sowie „Menschliche Gesundheit“. Über einen längeren Zeitraum (also bis 2060) können die für diese Handlungsfelder relevanten beschlossenen Maßnahmen (APA III) eine noch größere Wirksamkeit (im Sinne einer Reduktion des Klimarisikos) entfalten.

Im pessimistischen Fall wird für etwa die Hälfte der Handlungsfelder von einer geringeren Wirksamkeit beschlossener Maßnahmen (APA III) ausgegangen als im optimistischen Fall. Dies trifft zu für die Handlungsfelder „Landwirtschaft“, „Wald- und Forstwirtschaft“, „Biologische Vielfalt“ sowie „Verkehr, Verkehrsinfrastruktur“, „Energiewirtschaft“, „Industrie und Gewerbe“ und „Tourismuswirtschaft“. Einer der Hauptgründe dafür ist die (Nicht-)Verfügbarkeit natürlicher Ressourcen beziehungsweise wesentlicher (natürlicher) Produktionsfaktoren wie Wasser und Boden, da diese durch einen stärkeren Klimawandel in größerem Ausmaß in ihrer Funktionsweise beeinträchtigt oder in ihrer Verfügbarkeit beeinflusst werden, was auch bestimmte Anpassungsmaßnahmen entweder hinsichtlich ihrer Umsetzbarkeit oder Wirksamkeit einschränkt. Dies betrifft beispielsweise Maßnahmen(-bündel) wie den Waldumbau, Bewässerung in der Landwirtschaft, Renaturierung von Auen, Vorkehrungen gegenüber Niedrigwasser, die nur bis zu einem bestimmten Extremwertniveau greifen können oder Angebotserweiterungen/-substitutionen im Tourismus, wenn diese auf dem Vorhandensein bestimmter Landschaftsbilder oder der Vitalität bestimmter Naturräume beruhen.

In einer weiterreichenden Anpassung wird in fast allen Handlungsfeldern zusätzliches Anpassungspotenzial (gegenüber den im APA III vorgesehen Instrumenten) gesehen. Weiterreichende Anpassung im Handlungsfeld „Menschliche Gesundheit“ stellt diesbezüglich eine Ausnahme dar; hier wird die Wirksamkeit der beschlossenen Maßnahmen (APA III) und der weiterreichenden Anpassung gleich eingeschätzt, das heißt, das über die beschlossenen Maßnahmen hinausgehende Anpassungspotenzial der weiterreichenden Maßnahmen scheint begrenzt zu sein. Dies liegt vermutlich auch an dem relativ hohen Anpassungspotenzial der beschlossenen Maßnahmen (APA III). Auch im Handlungsfeld „Fischerei“ wird im pessimistischen Fall in der weiterreichenden Anpassung kein zusätzliches Anpassungspotenzial gesehen. Hier könnten die Grenzen der physischen Anpassungsfähigkeit erreicht sein (Klein et al. 2014).

Während im optimistischen Fall durchweg eine mittlere, teils sogar eine mittel-hohe, Wirksamkeit weiterreichender Anpassung angenommen wird, fällt die Einschätzung des Anpassungspotenzials im pessimistischen Fall geringer aus. Dies betrifft insbesondere die Handlungsfelder „Wald- und Forstwirtschaft“, „Biologische Vielfalt“, „Fischerei“, „Bauwesen“ und „Tourismuswirtschaft“; für diese wird eine gering-mittlere Wirksamkeit weiterreichender Anpassung angenommen, für alle anderen Handlungsfelder eine mittlere. Gründe sind, ähnlich wie oben angedeutet, in den Grenzen der Wasser- und Flächenverfügbarkeit und der gezielten Steuerbarkeit durch Verwaltung und Gesetzgebung zu sehen (beispielsweise aufgrund von Eigentumsstrukturen,

was die Wirksamkeit von Anpassungsmaßnahmen unter anderem im Gebäudebereich oder in der Privatwirtschaft einschränken kann).

**Tabelle 21: Anpassungskapazität auf Ebene der Handlungsfelder**

| Handlungsfeld                    | Klimarisiken ohne Anpassung |                        |               | Anpassungskapazität                           |                        |                                                           |              |               |
|----------------------------------|-----------------------------|------------------------|---------------|-----------------------------------------------|------------------------|-----------------------------------------------------------|--------------|---------------|
|                                  |                             |                        |               | Wirksamkeit beschlossener Maßnahmen (APA III) |                        | Wirksamkeit (heute absehbarer) weiterreichender Anpassung |              |               |
|                                  | Gegenwart                   | Mitte des Jahrhunderts |               | 2020-2030                                     | Mitte des Jahrhunderts |                                                           |              |               |
|                                  |                             | optimistisch           | pessimistisch |                                               | optimistisch           | pessimistisch                                             | optimistisch | pessimistisch |
| Landwirtschaft                   | mittel                      | mittel                 | hoch          | gering                                        | gering-mittel          | gering                                                    | mittel-hoch  | mittel        |
| Wald- und Forstwirtschaft        | mittel                      | mittel                 | hoch          | gering                                        | gering-mittel          | gering                                                    | mittel       | gering-mittel |
| Biologische Vielfalt             | gering                      | mittel                 | mittel-hoch   | gering                                        | gering-mittel          | gering                                                    | mittel       | gering-mittel |
| Boden                            | gering-mittel               | gering-mittel          | mittel-hoch   | gering                                        | gering-mittel          | gering-mittel                                             | mittel       | mittel        |
| Fischerei                        | gering-mittel               | mittel                 | hoch          | gering                                        | gering-mittel          | gering-mittel                                             | mittel       | gering-mittel |
| Küsten- und Meeresschutz         | mittel                      | mittel                 | hoch          | gering-mittel                                 | gering-mittel          | gering-mittel                                             | mittel       | mittel        |
| Wasserhaushalt, Wasserwirtschaft | mittel                      | mittel                 | hoch          | gering-mittel                                 | gering-mittel          | gering-mittel                                             | mittel       | mittel        |
| Verkehr, Verkehrsinfrastruktur   | gering-mittel               | gering                 | mittel        | gering-mittel                                 | mittel                 | gering-mittel                                             | mittel       | mittel        |
| Bauwesen                         | mittel                      | mittel                 | mittel-hoch   | gering-mittel                                 | gering-mittel          | gering-mittel                                             | mittel       | gering-mittel |
| Energiewirtschaft                | gering                      | gering                 | gering        | gering                                        | gering-mittel          | gering                                                    | mittel-hoch  | mittel        |
| Industrie und Gewerbe            | mittel                      | gering                 | mittel        | gering-mittel                                 | gering-mittel          | gering                                                    | mittel       | mittel        |
| Menschliche Gesundheit           | mittel                      | mittel                 | hoch          | gering-mittel                                 | mittel                 | mittel                                                    | mittel       | mittel        |
| Tourismuskapazität               | gering                      | gering                 | mittel        | gering-mittel                                 | gering-mittel          | gering                                                    | mittel-hoch  | gering-mittel |

### Ebene der Klimawirkungen

#### *Anpassungskapazität im Zeitraum 2020 bis 2030 – Fokus: beschlossene Maßnahmen (APA III)*

Auf der Ebene der Klimawirkungen wird in den beschlossenen Maßnahmen (APA III) im Zeitraum bis 2030 überwiegend ein geringes Potenzial für die Reduktion der Klimarisiken ohne Anpassung gesehen (siehe Tabelle 22, auch für die nachfolgenden Aussagen). Dies liegt erstens an der Dauer der Implementierung und des Wirksamwerdens von Maßnahmen. Diese Anpassungsdauer wird bei den ausgewählten Klimarisiken vornehmlich als mittel bis lang eingestuft, das heißt es wird deutlich mehr als zehn Jahre dauern, die Klimarisiken großräumig in Deutschland wirksam zu reduzieren. Zweitens ist Klimaanpassung eine Gemeinschaftsaufgabe, die eines koordinierten Handelns auf allen staatlichen und nicht-staatlichen Ebenen bedarf. Bei vielen Klimawirkungen ist der Bund lediglich für die politische Rahmensetzung zuständig. Hauptakteure



und wesentliche Ebene für die Umsetzung sind Länder, Kommunen und die Zivilgesellschaft.<sup>26</sup> Drittens umfassen die beschlossenen Maßnahmen des Bundes im Sinne der Rahmensetzung häufig weiche Instrumente und Maßnahmen (zum Beispiel zur Kommunikation und Kooperation), die wichtige Grundlagen für eine wirksame Anpassung liefern, aber für eine effektive Reduzierung des Klimarisikos nicht ausreichen und von anderen Akteuren aufgegriffen werden müssen. Ähnlich verhält es sich mit den vielfach beschlossenen Wissens-generierenden Maßnahmen (APA III), die ebenfalls wichtige Grundlagen für die Konkretisierung von Anpassungsmaßnahmen schaffen, dementsprechend aber zunächst (bis 2030) noch keine deutliche Reduzierung von Klimarisiken herbeiführen können. Ein vierter Grund für das gering eingestufte Potenzial der beschlossenen Maßnahmen zur Reduzierung der Klimarisiken ist der Wissenszuwachs über Klimarisiken. So wurden im Rahmen der KWRA 2021 mehr Klimawirkungen analysiert und teils als höhere Risiken bewertet als in der VA 2015. Die im APA III abgebildeten Maßnahmen waren aber an die VA 2015 gekoppelt, sodass der Wissensfortschritt hinsichtlich Klimarisiken noch nicht im APA III abgebildet ist und manche der ausgewählten Klimarisiken kaum im APA III adressiert werden.

Teilweise wird zumindest von einer geringen-mittleren Wirksamkeit der beschlossenen Maßnahmen ausgegangen, nämlich bei Klimawirkungen, denen mit relativ kurzfristig realisierbaren Maßnahmen begegnet werden kann (im Gesundheitsbereich sowie beispielsweise gegenüber Waldbrandrisiko).

In Einzelfällen ist bereits bis 2030 eine mittlere Wirksamkeit der beschlossenen Maßnahmen absehbar, so bei der Schiffbarkeit von Binnenschiffahrtsstraßen (woran auch der Warenverkehr über Wasserstraßen geknüpft ist). Hierfür befinden sich bereits relativ umfassende Anpassungsinstrumente in Umsetzung (Aktionsplan Niedrigwasser Rhein, DAS-Basisdienst, Transportkonzepte). Außerdem kann in der unmittelbaren Zukunft unter anderem verschiedenen Hitze-/Sonneneinstrahlungs-verknüpften Klimawirkungen „Stadtklima/Wärmeinseln“, „Hitzebelastung“ und „UV-bedingte Gesundheitsschädigungen“ mithilfe beschlossener Maßnahmen (APA III) entgegengewirkt werden.

---

<sup>26</sup> Eine Betrachtung des gesamten Anpassungspotenzials für die Reduktion von Klimarisiken durch bereits beschlossene oder geplante Maßnahmen der Länder und Kommunen wurde nicht vorgenommen. Dies wird gegebenenfalls bei einer Weiterentwicklung der Methodik einer künftigen KWRA vorgenommen werden.

**Tabelle 22: Anpassungskapazität auf Ebene der Klimawirkungen**

| Klimawirkung                                                                   | Klimarisiken ohne Anpassung |                        |               | Anpassungskapazität                           |                        |                                        |               |               | Anpassungs-dauer <sup>3</sup> |
|--------------------------------------------------------------------------------|-----------------------------|------------------------|---------------|-----------------------------------------------|------------------------|----------------------------------------|---------------|---------------|-------------------------------|
|                                                                                |                             |                        |               | Wirksamkeit beschlossener Maßnahmen (APA III) |                        | Wirksamkeit weiterreichender Anpassung |               |               |                               |
|                                                                                | Gegenwart                   | Mitte des Jahrhunderts |               | 2020-2030                                     | Mitte des Jahrhunderts |                                        |               |               |                               |
|                                                                                |                             | optimistisch           | pessimistisch |                                               | optimistisch           | pessimistisch                          | optimistisch  | pessimistisch |                               |
| <b>Landwirtschaft</b>                                                          |                             |                        |               |                                               |                        |                                        |               |               |                               |
| Abiotischer Stress (Pflanzen)                                                  | mittel                      | mittel                 | hoch          | gering                                        | gering                 | gering                                 | mittel-hoch   | mittel        | 10-50 Jahre                   |
| Ertragsausfälle                                                                | mittel                      | mittel                 | hoch          | gering                                        | gering-mittel          | gering-mittel                          | mittel-hoch   | mittel        | 10-50 Jahre                   |
| <b>Wald- und Forstwirtschaft</b>                                               |                             |                        |               |                                               |                        |                                        |               |               |                               |
| Hitze- und Trockenstress                                                       | mittel                      | mittel                 | hoch          | gering                                        | mittel                 | gering-mittel                          | mittel        | gering-mittel | > 50 Jahre                    |
| Stress durch Schädlinge/Krankheiten                                            | mittel                      | mittel                 | hoch          | gering                                        | gering-mittel          | gering-mittel                          | mittel        | gering-mittel | > 50 Jahre                    |
| Waldbrandrisiko                                                                | gering                      | gering                 | mittel        | gering-mittel                                 | gering-mittel          | gering                                 | mittel        | gering-mittel | > 50 Jahre                    |
| Nutzfunktion: Holzertrag                                                       | mittel                      | mittel                 | hoch          | gering                                        | mittel                 | gering-mittel                          | mittel        | gering-mittel | 10-50 Jahre                   |
| <b>Biologische Vielfalt</b>                                                    |                             |                        |               |                                               |                        |                                        |               |               |                               |
| Ausbreitung invasiver Arten                                                    | mittel                      | mittel                 | hoch          | gering                                        | gering-mittel          | gering                                 | mittel        | gering-mittel | 10-50 Jahre                   |
| Verlust an genetischer Vielfalt                                                | gering                      | gering                 | mittel        | gering                                        | gering                 | gering                                 | gering-mittel | gering-mittel | 10-50 Jahre                   |
| Verschiebung von Arealen und Rückgang der Bestände                             | gering                      | mittel                 | mittel        | gering                                        | gering-mittel          | gering                                 | mittel        | gering-mittel | 10-50 Jahre                   |
| Schäden an wassergebundenen Habitaten und Feuchtgebieten                       | mittel                      | mittel                 | hoch          | gering                                        | gering-mittel          | gering-mittel                          | mittel        | mittel        | 10-50 Jahre                   |
| Schäden an Wäldern                                                             | mittel                      | mittel                 | hoch          | gering                                        | gering-mittel          | gering-mittel                          | mittel        | gering-mittel | > 50 Jahre                    |
| <b>Boden</b>                                                                   |                             |                        |               |                                               |                        |                                        |               |               |                               |
| Bodenerosion durch Wasser                                                      | mittel                      | mittel                 | hoch          | gering                                        | gering-mittel          | gering-mittel                          | mittel        | gering-mittel | 10-50 Jahre                   |
| Wassermangel im Boden                                                          | mittel                      | mittel                 | hoch          | gering                                        | gering-mittel          | gering-mittel                          | mittel        | mittel        | 10-50 Jahre                   |
| Bodenerosion durch Wind                                                        | mittel                      | mittel                 | hoch          | gering                                        | gering                 | gering                                 | mittel        | mittel        | 10-50 Jahre                   |
| Produktionsfunktionen                                                          | mittel                      | mittel                 | hoch          | gering                                        | gering-mittel          | gering-mittel                          | mittel        | gering-mittel | 10-50 Jahre                   |
| <b>Fischerei</b>                                                               |                             |                        |               |                                               |                        |                                        |               |               |                               |
| Entkopplung von Nahrungsbeziehungen in der Ostsee                              | mittel                      | hoch                   | hoch          | gering                                        | gering                 | gering                                 | mittel        | gering-mittel | < 10 Jahre                    |
| Verbreitung von Fischarten in Fließgewässern                                   | gering                      | mittel                 | hoch          | gering-mittel                                 | gering-mittel          | gering-mittel                          | mittel        | gering-mittel | 10-50 Jahre                   |
| <b>Küsten- und Meeresschutz</b>                                                |                             |                        |               |                                               |                        |                                        |               |               |                               |
| Wasserqualität und Grundwasserversalzung                                       | mittel                      | mittel                 | hoch          | gering                                        | gering-mittel          | gering-mittel                          | mittel        | mittel        | > 50 Jahre                    |
| Naturräumliche Veränderungen an Küsten                                         | mittel                      | mittel                 | hoch          | gering                                        | gering                 | gering                                 | mittel        | mittel        | > 50 Jahre                    |
| Überlastung der Entwässerungseinrichtungen in überflutungsgefährdeten Gebieten | mittel                      | mittel                 | hoch          | gering-mittel                                 | gering-mittel          | gering-mittel                          | mittel-hoch   | mittel-hoch   | 10-50 Jahre                   |

<sup>3</sup> Umfassende Maßnahmen zur Reduzierung des Klimarisikos werden wirksam.

| Klimawirkung                                                                         | Klimarisiken ohne Anpassung |                        |               | Anpassungskapazität                           |                        |               |                                        |               |             | Anpassungsdauer <sup>3</sup> |
|--------------------------------------------------------------------------------------|-----------------------------|------------------------|---------------|-----------------------------------------------|------------------------|---------------|----------------------------------------|---------------|-------------|------------------------------|
|                                                                                      |                             |                        |               | Wirksamkeit beschlossener Maßnahmen (APA III) |                        |               | Wirksamkeit weiterreichender Anpassung |               |             |                              |
|                                                                                      | Gegenwart                   | Mitte des Jahrhunderts |               | 2020-2030                                     | Mitte des Jahrhunderts |               |                                        |               |             |                              |
|                                                                                      |                             | optimistisch           | pessimistisch |                                               | optimistisch           | pessimistisch | optimistisch                           | pessimistisch |             |                              |
| <b>Wasserhaushalt, Wasserwirtschaft</b>                                              |                             |                        |               |                                               |                        |               |                                        |               |             |                              |
| Belastung oder Versagen von Hochwasserschutzsystemen                                 | mittel                      | mittel                 | hoch          | gering-mittel                                 | mittel-hoch            | mittel-hoch   | mittel-hoch                            | mittel-hoch   | 10-50 Jahre |                              |
| Sturzfluten (Versagen von Entwässerungseinrichtungen und Überflutungsschutzsystemen) | mittel                      | mittel                 | hoch          | gering                                        | gering                 | gering        | gering-mittel                          | gering-mittel | 10-50 Jahre |                              |
| Gewässertemperatur und Eisbedeckung und biologische Wasserqualität                   | mittel                      | mittel                 | hoch          | gering                                        | gering-mittel          | gering        | mittel                                 | mittel        | 10-50 Jahre |                              |
| Grundwasserstand und Grundwasserqualität                                             | gering                      | gering                 | hoch          | gering                                        | gering                 | gering        | gering-mittel                          | gering        | 10-50 Jahre |                              |
| <b>Verkehr, Verkehrsinfrastruktur</b>                                                |                             |                        |               |                                               |                        |               |                                        |               |             |                              |
| Schiffbarkeit der Binnenschiff-fahrtsstraßen (Niedrigwasser)                         | mittel                      | mittel                 | hoch          | mittel                                        | mittel-hoch            | mittel        | mittel-hoch                            | hoch          | 10-50 Jahre |                              |
| <b>Bauwesen</b>                                                                      |                             |                        |               |                                               |                        |               |                                        |               |             |                              |
| Schäden an Gebäuden aufgrund von Flusshochwasser                                     | mittel                      | mittel                 | hoch          | gering                                        | gering-mittel          | gering-mittel | mittel                                 | mittel        | 10-50 Jahre |                              |
| Vegetation in Siedlungen                                                             | gering                      | mittel                 | mittel        | gering                                        | gering-mittel          | gering        | mittel                                 | gering-mittel | > 50 Jahre  |                              |
| Stadtklima/Wärmeinseln                                                               | mittel                      | mittel                 | hoch          | gering-mittel                                 | mittel                 | gering-mittel | mittel                                 | mittel        | 10-50 Jahre |                              |
| <b>Industrie und Gewerbe</b>                                                         |                             |                        |               |                                               |                        |               |                                        |               |             |                              |
| Beeinträchtigung der Versorgung mit Rohstoffen und Zwischenprodukten (international) | mittel                      | mittel                 | hoch          | gering                                        | gering                 | gering        | mittel                                 | gering-mittel | < 10 Jahre  |                              |
| Beeinträchtigung des Warenverkehrs über Wasserstraßen (Inland)                       | mittel                      | mittel                 | hoch          | mittel                                        | mittel                 | gering-mittel | mittel                                 | mittel        | 10-50 Jahre |                              |
| <b>Menschliche Gesundheit</b>                                                        |                             |                        |               |                                               |                        |               |                                        |               |             |                              |
| Hitzebelastung                                                                       | hoch                        | mittel                 | hoch          | gering-mittel                                 | mittel                 | gering-mittel | mittel                                 | mittel        | 10-50 Jahre |                              |
| UV-bedingte Gesundheitsschädigungen (insb. Hautkrebs)                                | mittel                      | mittel                 | hoch          | gering-mittel                                 | gering-mittel          | gering-mittel | mittel                                 | mittel        | 10-50 Jahre |                              |
| Allergische Reaktionen durch Aeroallergene pflanzlicher Herkunft (z. B. Pollen)      | gering                      | mittel                 | hoch          | gering-mittel                                 | mittel                 | mittel        | mittel                                 | mittel        | 10-50 Jahre |                              |

<sup>3</sup> Umfassende Maßnahmen zur Reduzierung des Klimarisikos werden wirksam.

### Mitte des Jahrhunderts, optimistischer Fall

Für den Zeitraum bis 2060 zeigt sich im optimistischen Fall fast durchweg zumindest eine gering-mittlere Wirksamkeit der beschlossenen Maßnahmen (APA III), das heißt die beschlossenen Maßnahmen haben das Potenzial die Klimarisiken zumindest leicht zu senken.<sup>27</sup> In vielen Fällen ergibt sich aufgrund des langen Zeitraums bis zum Wirksamwerden der beschlossenen Maßnahmen sogar eine bessere Situation als gegenwärtig (Überkompensation durch beschlossene Maßnahmen) und eine höhere Wirksamkeit der beschlossenen Maßnahmen als im Zeitraum 2020 bis 2030.

<sup>27</sup> Bei der Interpretation dieser Ergebnisse zur Wirksamkeit sollten die zuvor für den Zeitraum 2020 bis 2030 angeführten Erwägungen ebenfalls in den Blick genommen werden.

Bei der weiterreichenden Anpassung wird überwiegend von einer mittleren Wirksamkeit ausgegangen. Bei Klimawirkungen, für die Anpassung zu einem beträchtlichen Teil mithilfe technischer, technologischer und/oder baulicher Maßnahmen erzielt werden kann (Hochwasser, Niedrigwasser, Landwirtschaft), wird sogar eine mittlere-hohe Wirksamkeit weiterreichender Anpassung angenommen.

Für die überwiegende Anzahl von Klimawirkungen übersteigt das eingeschätzte Potenzial der weiterreichenden Anpassung zur Reduzierung der Klimarisiken dasjenige der im APA III verankerten beschlossenen Maßnahmen. Ausnahmen stellen hier Anpassung in den Bereichen Hochwasser und Niedrigwasser (Schiffbarkeit, Warentransport, Hochwasserschutzsysteme) sowie hitze- und trockenheitsbeeinflusste Klimawirkungen dar (Forstwirtschaft, Stadtklima, Menschliche Gesundheit). In diesen Bereichen scheint das Anpassungspotenzial der beschlossenen Maßnahmen (APA III) im Verhältnis zum Klimarisiko schon relativ hoch zu sein oder weiterreichende Anpassung scheint wenig zusätzliches Anpassungspotenzial zu haben.

#### *Mitte des Jahrhunderts, pessimistischer Fall*

Im pessimistischen Fall wird das Potenzial der beschlossenen Maßnahmen zur Reduzierung der Klimarisiken bis 2060 überwiegend als gering-mittel eingeschätzt. Beschlossene Maßnahmen können bestimmte Klimarisiken zwar teils senken. Mehrheitlich wird aber von einer begrenzten Wirksamkeit der beschlossenen Maßnahmen zur Reduzierung der Klimarisiken ausgegangen. Dies hat mehrere Gründe: Zum einen sind Maßnahmen (noch) nicht umfassend genug, das heißt sie sind auf Teilaspekte der Gesamtwirkzusammenhänge, also beispielsweise Teildynamiken von Ökosystemen, bestimmte Habitate oder Biotoptypen, Teilflächen oder ähnliche Ausschnitte aus dem jeweiligen Gesamtsystem, beschränkt, können aber nicht überall im Zeitraum bis 2060 vollumfänglich wirksam werden. Das gilt beispielsweise für Maßnahmen gegen Hitze- und Trockenstress in Wäldern oder gegen die klimawandelbedingte zusätzliche Ausbreitung invasiver Arten, die Verschiebung von Arealen und den Rückgang der Bestände von Arten. Maßnahmen wirken hier jeweils nur auf einer begrenzten Fläche oder sind auf ein Teilsystem fokussiert, beispielsweise hinsichtlich genetischer Vielfalt zielen Maßnahmen auf den Erhalt forstgenetischer Ressourcen ab. Auch mit Blick auf klimaresilientes Bauen ist die Wirksamkeit beziehungsweise der Einflussbereich von Anpassungsmaßnahmen aufgrund von Eigentumsstrukturen und Denkmalschutz eingeschränkt.

Außerdem wird für den pessimistischen Fall infolge eines stärkeren Klimawandels teilweise von einer eingeschränkten Wirksamkeit der beschlossenen Anpassungsmaßnahmen ausgegangen. Dies gilt zum Beispiel für Maßnahmen in der Forstwirtschaft, wie dem Waldumbau: Hier sind die wesentlichen Produktionsfaktoren, also Bodenfunktionen und Wasserverfügbarkeit, im pessimistischen Fall selbst stark beeinträchtigt, weshalb Anpassung dann weniger wirksam ist. Bei Wäldern wird davon ausgegangen, dass bis 2060 bereits ein deutlich höherer Anteil umgebaut und naturnäher sein wird als heute, dadurch mehr und vielfältigere Habitate bereitstehen und diese Wälder einen Reifegrad erreicht haben werden, durch den ein mäßiger Klimawandel schon recht gut abgepuffert werden kann. Bei einem starken Klimawandel (wie im pessimistischen Fall) ist die Resilienz dennoch naturgemäß geringer beziehungsweise begrenzt. Auch Maßnahmen zur Wiedervernässung (von degradierten Mooren oder ehemaligen Feuchtgebieten) können im pessimistischen Fall aufgrund eines generellen Wasserdefizits in der Landschaft insgesamt weniger umgesetzt und wirksam werden. Zwar kann veränderten Niederschlagsverteilungen (in zeitlicher Hinsicht und mengenmäßig je Niederschlagsereignis) mithilfe von Anpassungsmaßnahmen bis zu einem gewissen Grad begegnet werden, wenn zumindest die durchschnittliche jährliche Niederschlagsmenge in etwa gleich bleibt, aber auch solche Eingriffe können bei starken, langanhaltenden Niederschlagsdefiziten an Grenzen geraten. Die Wirksamkeit zahlreicher Anpassungsmaßnahmen hängt also von der Stärke des Klimawandels ab, auf den die

jeweilige Maßnahme trifft. Erfolgreicher Klimaschutz ist wichtig für eine erfolgreiche Anpassung.

Bestimmte Elemente beschlossener Maßnahmen können mittelfristig auch im pessimistischen Fall gute Wirksamkeit entfalten. Hierzu zählt zum Beispiel die Sensibilisierung der Bevölkerung als wesentliche Komponente von Anpassung bei bestimmten Klimawirkungen, wie beispielsweise Waldbrandrisiko, allergische Reaktionen gegenüber Aeroallergenen, Hitzebelastung und Gebäudeschadensrisiken durch Hochwasser. Ebenso fallen Maßnahmen im Zusammenhang mit Niedrig- und Hochwassermanagement darunter, für die es bereits vergleichsweise umfassende Konzepte gibt.

Im Vergleich zur Anpassung durch die beschlossenen Maßnahmen wird das Potenzial weiterreichender Anpassung zur Reduzierung von Klimarisiken – auch im pessimistischen Fall – höher eingeschätzt. Besonders in den Handlungsfeldern „Landwirtschaft“ und „Küsten- und Meeresschutz“, bei einzelnen Klimawirkungen im Handlungsfeld „Boden“ (Winderosion, Wassermangel im Boden) sowie bei nahezu allen Klimawirkungen mit Infrastrukturbezug (in den Handlungsfeldern „Wasserhaushalt, Wasserwirtschaft“, „Bauwesen“, „Verkehr, Verkehrsinfrastruktur“, „Industrie und Gewerbe“) und gegenüber „UV-bedingten Gesundheitsschädigungen“ wird sowohl im optimistischen als auch im pessimistischen Fall eine höhere Wirksamkeit weiterreichender Anpassung (gegenüber den beschlossenen Maßnahmen) angenommen und zwar mindestens eine mittlere Wirksamkeit. In diesen Bereichen, also insbesondere in den anthropogenen Systemen und teils auch in naturbasierten Systemen (Landwirtschaft) erwächst Anpassungspotenzial zum einen aus technologischem Fortschritt und schöpft sich zum anderen aus naturbasierten Lösungen (Ufervegetation, Lahnungsfelder, Sandaufspülungen, blau-grün-graue Infrastrukturen beim Küstenzonenmanagement, Renaturierung von Flussauen, blaue und grüne Strukturen in urbanen Räumen) sowie einer Verbesserung der rechtlichen Rahmenbedingungen.

Im Gegensatz dazu wird auch für weiterreichende Anpassung bei Klimawirkungen, bei denen Hitze- und Trockenheitsschädigung und deren Folgewirkungen eine Rolle spielen (zum Beispiel Schaderreger in der Forstwirtschaft) oder bei Klimawirkungen in komplexen natürlichen Systemen (zum Beispiel im Handlungsfeld „Fischerei“, bei den Klimawirkungen „Grundwasserstand und Grundwasserqualität“ und „Ausbreitung invasiver Arten“) eine begrenzte Wirksamkeit angenommen. Hier kann lediglich an Teilsystemen oder Teilflächen angesetzt und nicht umfassend auf die gesamte Dynamik des Systems eingewirkt werden.

Zu berücksichtigen ist darüber hinaus, dass die Verwirklichung weiterreichender Anpassung nicht unbedingt für alle Klimawirkungen gleichzeitig erfolgen kann, da sich bestimmte Maßnahmen zum Teil gegenseitig ausschließen oder hinsichtlich des Flächenbedarfs entweder in Konkurrenz zueinander oder zu anderen Raumnutzungsansprüchen stehen. Beispiele hierfür sind die Renaturierung von Überschwemmungsflächen, die Entsiegelung von Flächen im Hochwasserschutz oder die Wiedervernässung von degradierten Mooren – also Maßnahmen, die Anpassungspotenzial besitzen, aber in Konkurrenz zu anderen Nutzungsinteressen stehen (Siedlungsbau, Landwirtschaft). Auch in der Forstwirtschaft kann beispielsweise klimawandelbedingt potenziell rückläufigen Holzserträgen durch den Anbau fremdländischer hitze- und trockenresistenterer Arten (Douglasie, Zeder) oder intensivere Schaderregerbekämpfung entgegengewirkt werden. Letzteres steht allerdings dem Erhalt der genetischen Vielfalt entgegen und ersteres kann im Konflikt zur Eindämmung der Verdrängung von Arten und der Ausbreitung invasiver Arten stehen. Weiterhin stellt die Vernetzung der Landschaft (Biotopvernetzung) eine Maßnahme zum Erhalt der biologischen Vielfalt unter Klimawandelbedingungen dar, die gleichzeitig die Ausbreitung invasiver Arten fördern und damit der Prävention und dem Management der Ausbreitung invasiver Arten zuwiderlaufen kann.



Abgesehen von solchen Herausforderungen bei der Konzipierung und Umsetzung von Anpassungsmaßnahmen wird bei allen Klimawirkungen das Potenzial gesehen, dass sich die Wirksamkeit von Anpassungsmaßnahmen bis zum Ende des Jahrhunderts steigern lässt. Diesen Einschätzungen liegen vor allem Annahmen von Technik- und Erkenntnisfortschritten (im Allgemeinen), von Fortschritten im Wasser- und Bewässerungsmanagement sowie von Veränderungen in den Produktions- und Konsumstrukturen zugrunde, letzteres beispielsweise mit Blick auf landwirtschaftliche Erträge. Während technische und Forschungsfortschritte zur Klimawandelanpassung in sehr vielen verschiedenen Bereichen beitragen können, gilt dies ganz besonders für die Entwicklung von Impfstoffen oder Medikamenten gegen bestimmte vektorübertragene Infektionskrankheiten oder Allergien, die klimawandelbedingt vermehrt auftreten können. Darüber hinaus kann beispielsweise im Stadtumbau langfristig der Flächenanteil von grüner und blauer Infrastrukturen gegenüber grauer Infrastruktur gesteigert werden. Für den Rück- und Umbau grauer Infrastrukturen im Rahmen von Sanierungen und die Umsetzung klimaangepasster städtebaulicher Konzepte ist allerdings von einem langen Zeithorizont auszugehen. Mit Blick auf klimawandelbedingt häufigere Hochwasserereignisse ist langfristig Steigerungspotenzial der Anpassung in der Rücknahme von Siedlungsbereichen zu sehen, die als Bestand in Überschwemmungsgebieten liegen. Auch hierbei spielen insbesondere langfristige Planungs- und Abwägungsprozesse (also auch gesellschaftliche Akzeptanz) eine wesentliche Rolle (siehe Grenzen der Anpassung und tiefgreifende Anpassung).

## 5.2 Gesamtbild der Klimarisiken mit Anpassung

Aus der Kombination der Klimarisiken ohne Anpassung und der im vorigen Abschnitt geschilderten Anpassungskapazität ergeben sich die Klimarisiken mit Anpassung, also die verbleibenden Restrisiken (siehe hierzu Teilbericht 1, „Konzept und Methodik“).

### Ebene der Handlungsfelder

Auf Ebene der Handlungsfelder können die Klimarisiken mit Anpassung auf ein gering-mittleres beziehungsweise auf ein geringes Ausmaß reduziert werden, da die Klimarisiken ohne Anpassung im optimistischen Fall relativ gering sind und die Wirksamkeit der beschlossenen Maßnahmen (APA III) und der weiterreichenden Anpassung relativ hoch ist. Im pessimistischen Fall hingegen sind die Klimarisiken größer und die Wirksamkeit der Anpassung geringer, sodass für die Klimarisiken mit beschlossenen Maßnahmen (APA III) größtenteils mittlere, mittel-hohe und hohe Werte angenommen werden. Weiterreichende Anpassung kann die Klimarisiken im pessimistischen Fall teils auf gering und überwiegend auf gering-mittel und mittel senken, teilweise nimmt auch das reduzierte Risiko noch ein mittel-hohes Ausmaß an (siehe Tabelle 23, auch für nachfolgende Aussagen).

Für den Zeitraum bis 2060 zeigt sich im optimistischen Fall, dass die Klimarisiken ohne Anpassung entweder im Vergleich zur Gegenwart nicht steigen oder dass der Anstieg durch die beschlossenen Maßnahmen kompensiert werden kann, sodass die Restrisiken nicht höher sind als die Klimarisiken ohne Anpassung im Gegenwartszeitraum. Es ergeben sich also nach Umsetzung der beschlossenen Maßnahmen geringe beziehungsweise gering-mittlere Klimarisiken. Wenn weiterreichende Anpassung berücksichtigt wird, werden im optimistischen Fall bis 2060 durchweg geringe Klimarisiken erwartet.

Im pessimistischen Fall sind die Klimarisiken ohne Anpassung höher und die Wirksamkeit der Anpassung geringer als im optimistischen Fall, sodass die Klimarisiken mit beschlossenen Maßnahmen (APA III) größtenteils bei mittel, mittel-hoch und hoch liegen. In manchen Handlungsfeldern wird so mit höheren Klimarisiken mit beschlossenen Maßnahmen als im optimistischen

Fall gerechnet. In den Handlungsfeldern „Landwirtschaft“ und „Wald- und Forstwirtschaft“ bleiben die Klimarisiken im Zeitraum Mitte des Jahrhunderts auch nach beschlossenen Anpassungsmaßnahmen hoch und in den Handlungsfeldern „Biologische Vielfalt“, „Fischerei“, „Wasserhaushalt, Wasserwirtschaft“ und „Küsten- und Meeresschutz“ mittel-hoch. Die hohen Klimarisiken mit Anpassung in diesen Handlungsfeldern zeigen, dass natürliche Systeme beziehungsweise Systeme, die natürliche Ressourcen nutzen, von einer pessimistischen Szenarienkombination nicht nur besonders negativ beeinträchtigt wären, sondern dass dann hier auch oft die Notwendigkeit weiterreichender Anpassung besteht.

**Tabelle 23: Klimarisiken mit Anpassung auf Ebene der Handlungsfelder**

| Handlungsfeld                    | Klimarisiken ohne Anpassung |                        |              | Klimarisiken mit Anpassung            |                        |                                |               |               | Gewissheit der Bewertung (Klimarisiken mit Anpassung) |                        |
|----------------------------------|-----------------------------|------------------------|--------------|---------------------------------------|------------------------|--------------------------------|---------------|---------------|-------------------------------------------------------|------------------------|
|                                  |                             |                        |              | mit beschlossenen Maßnahmen (APA III) |                        | mit weiterreichender Anpassung |               |               |                                                       |                        |
|                                  | Gegenwart                   | Mitte des Jahrhunderts |              | 2020-2030                             | Mitte des Jahrhunderts |                                |               |               | 2020-2030                                             | Mitte des Jahrhunderts |
| Optimistisch                     |                             | Pessimistisch          | Optimistisch |                                       | Pessimistisch          | Optimistisch                   | Pessimistisch |               |                                                       |                        |
| Landwirtschaft                   | mittel                      | mittel                 | hoch         | mittel                                | gering-mittel          | hoch                           | gering        | mittel        | mittel                                                | mittel                 |
| Wald und Forstwirtschaft         | mittel                      | mittel                 | hoch         | mittel                                | gering-mittel          | hoch                           | gering        | mittel-hoch   | mittel                                                | gering                 |
| Biologische Vielfalt             | gering                      | mittel                 | mittel-hoch  | gering                                | gering-mittel          | mittel-hoch                    | gering        | mittel        | mittel                                                | gering                 |
| Boden                            | gering-mittel               | gering-mittel          | mittel-hoch  | gering-mittel                         | gering                 | mittel                         | gering        | gering-mittel | mittel                                                | gering                 |
| Fischerei                        | gering-mittel               | mittel                 | hoch         | gering-mittel                         | gering-mittel          | mittel-hoch                    | gering        | mittel-hoch   | mittel                                                | gering                 |
| Küsten- und Meeresschutz         | mittel                      | mittel                 | hoch         | gering-mittel                         | gering-mittel          | mittel-hoch                    | gering        | mittel        | mittel                                                | mittel                 |
| Wasserhaushalt, Wasserwirtschaft | mittel                      | mittel                 | hoch         | gering-mittel                         | gering-mittel          | mittel-hoch                    | gering        | mittel        | mittel                                                | gering                 |
| Verkehr, Verkehrsinfrastruktur   | gering-mittel               | gering                 | mittel       | gering                                | gering                 | gering-mittel                  | gering        | gering        | mittel                                                | gering                 |
| Bauwesen                         | mittel                      | mittel                 | mittel-hoch  | gering-mittel                         | gering-mittel          | mittel                         | gering        | gering-mittel | mittel                                                | gering                 |
| Energiewirtschaft                | gering                      | gering                 | gering       | gering                                | gering                 | gering                         | gering        | gering        | mittel                                                | mittel                 |
| Industrie und Gewerbe            | mittel                      | gering                 | mittel       | gering-mittel                         | gering                 | mittel                         | gering        | gering        | mittel                                                | gering                 |
| Menschliche Gesundheit           | mittel                      | mittel                 | hoch         | gering-mittel                         | gering                 | mittel                         | gering        | mittel        | mittel                                                | gering                 |
| Tourismuswirtschaft              | gering                      | gering                 | mittel       | gering                                | gering                 | mittel                         | gering        | gering-mittel | gering                                                | sehr gering            |

Mit weiterreichender Anpassung werden auch im pessimistischen Fall in keinem Handlungsfeld hohe Risiken angenommen, in der „Wald- und Forstwirtschaft“ sowie „Fischerei“ wird aber von mittel-hohen Klimarisiken ausgegangen. Für die weiteren mit natürlichen Systemen eng verbundenen Handlungsfelder, also „Landwirtschaft“, „Biologische Vielfalt“, „Küsten- und Meeres-

schutz“ und „Wasserhaushalt, Wasserwirtschaft“, ergeben sich nach Wirksamwerden weiterreichender Anpassung mittlere Risiken, für das Handlungsfeld „Boden“ gering-mittlere. Damit weisen diese Handlungsfelder trotz weiterreichender Anpassung höhere Risiken auf als gegenwärtig.

In den Handlungsfeldern „Landwirtschaft“, „Küsten- und Meeresschutz“, „Wasserhaushalt, Wasserwirtschaft“ birgt das Wirksamwerden weiterreichender Anpassung auf Ebene der Handlungsfelder das Potenzial, Klimarisiken auch im pessimistischen Fall deutlich zu reduzieren. Außerdem kann dadurch eine Verschlechterung gegenüber den gegenwärtigen Klimarisiken in diesen Sektoren trotz des fortschreitenden Klimawandels bis 2060 und der Annahme des Eintretens der ungünstigeren Szenarienkombination verhindert werden. In den infrastruktur- und wirtschaftsbezogenen Handlungsfeldern wie „Verkehr, Verkehrsinfrastruktur“, „Bauwesen“, „Industrie und Gewerbe“ bestehen sogar deutliche Risikoreduzierungspotenziale durch weiterreichende Anpassung auf geringe beziehungsweise gering-mittlere Klimarisiken. Damit kann sich die Situation bei diesen Klimarisiken sogar gegenüber der Gegenwart durch das Wirksamwerden weiterreichender Anpassung bis 2060 (trotz fortschreitenden Klimawandels in diesem Zeitraum) deutlich verbessern. Bis auf „Fischerei“ und „Menschliche Gesundheit“ können in allen Handlungsfeldern die Risiken mit weiterreichender Anpassung gegenüber dem Risikoausmaß nach Umsetzung der im APA III verankerten Maßnahmen noch einmal (deutlich) reduziert werden. Insgesamt wird deutlich, dass Klimarisiken zumindest mittelfristig auf einem mittleren oder teils sogar gering-mittleren Niveau gehalten werden können, wenn sie sich mithilfe baulicher und technischer Maßnahmen wirksam regulieren lassen.

Im Vergleich zur Gegenwart steigen bis zur Mitte des Jahrhunderts die Klimarisiken im pessimistischen Fall trotz Anpassung jedoch, wie bereits zuvor angedeutet, in den Handlungsfeldern „Wald- und Forstwirtschaft“, „Biologische Vielfalt“ und „Fischerei“. Für natürliche Systeme und teilweise für davon direkt abhängige wirtschaftliche Aktivitäten (Forstwirtschaft, Fischerei) ergeben sich also trotz weiterreichender Anpassung höhere Risiken als gegenwärtig, wenn von einem starken Klimawandel bis zur Mitte des Jahrhunderts ausgegangen wird (im pessimistischen Fall). Dem Trend der zunehmenden Klimarisiken (auch nach Wirksamwerden weiterreichender Anpassung), insbesondere bei natürlichen Systemen, müsste daher auch nach 2060 mit einer weiteren Steigerung der Anpassungsbemühungen begegnet werden (siehe Kapitel 6).

### **Ebene der Klimawirkungen**

Bis 2030 ergeben sich mit Anpassung im Rahmen der beschlossenen Maßnahmen (APA III) überwiegend mittlere oder gering-mittlere Klimarisiken (siehe Tabelle 24, auch für die nachfolgenden Aussagen). Geringe Klimarisiken werden bis 2030 nur in den Bereichen erwartet, in denen die Risiken auch gegenwärtig gering eingeschätzt werden. In der Kürze der Zeit, also bis 2030, lassen sich insbesondere Klimarisiken mithilfe beschlossener Maßnahmen (APA III) verringern, an die sich unter anderem über Wasserstands-regulierende (bauliche, technische) Eingriffe angepasst werden kann („Überlastung der Entwässerungseinrichtungen in überflutungsgefährdeten Gebieten“, „Belastung oder Versagen von Hochwasserschutzsystemen“, „Schiffbarkeit der Binnenschiffahrtsstraßen (Niedrigwasser)“) sowie solche, die mit Hitze und starker Sonneneinstrahlung in Zusammenhang stehen (Hitze-, UV-Strahlungsbelastung, Stadtklima).

#### *Mitte des Jahrhunderts, optimistischer Fall*

Bis 2060 werden im optimistischen Fall mit Anpassung in Form der beschlossenen Maßnahmen (APA III) größtenteils gering-mittlere und mittlere Klimarisiken erwartet.

Vielfach kann sich das Risiko gegenüber heute verringern, das heißt die beschlossenen Maßnahmen werden erst über den längeren Zeitraum bereits wirksam und können die Situation im Vergleich zur Gegenwart verbessern, was aber auch daran liegt, dass die Risiken bei diesen Klimawirkungen im optimistischen Fall nicht steigen (also auch ohne Anpassung wird keine Steigerung der Risiken erwartet). Bei einigen Klimawirkungen kann sich das Klimarisiko durch die beschlossenen Maßnahmen deutlich verringern („Hitze- und Trockenstress“ von Wäldern, „Nutzfunktion: Holztrag“, „Belastung oder Versagen von Hochwasserschutzsystemen“, „Schiffbarkeit der Binnenschiffahrtsstraßen (Niedrigwasser)“, „Stadtklima/Wärmeinseln“, „Beeinträchtigung des Warenverkehrs über Wasserstraßen (Inland)“, „Allergische Reaktionen durch Aeroallergene pflanzlicher Herkunft“). Wenn Klimarisiken gegenüber dem Gegenwartszeitraum bis zur Mitte des Jahrhunderts im optimistischen Fall zunehmen, können die beschlossenen Maßnahmen dies nicht vollständig kompensieren, aber teilweise eine leichte Verringerung des Risikos gegenüber der angenommenen Situation ohne Anpassung herbeiführen („Verschiebung von Arealen und Rückgang der Bestände“, „Verbreitung von Fischarten in Fließgewässern“, „Vegetation in Siedlungen“). Bei manchen Klimawirkungen ist im Verhältnis zum Klimarisiko großes Anpassungspotenzial vorhanden („Waldbrandrisiko“, „Belastung oder Versagen von Hochwasserschutzsystemen“ und „Schiffbarkeit der Binnenschiffahrtsstraßen (Niedrigwasser)“). Die Klimarisiken mit Anpassung würden teils rein rechnerisch auf einen Wert gesenkt, der kleiner wäre als „gering“. Da dies in der Methodik nicht vorgesehen ist, spiegelt sich im Klimarisikowert mit Anpassung nicht das gesamte (für den optimistischen Fall) angenommene Potenzial der Anpassung wider. Hier ist also durch die beschlossenen Maßnahmen bereits eine relativ gute Vorbereitung gegeben. Mit den genannten Klimarisiken könnte mithilfe der beschlossenen Maßnahmen (APA III) vergleichsweise gut umgegangen werden. Im Fall des Niedrigwassers bei Binnenschiffahrtsstraßen könnte sich gar ein ökonomischer Vorteil ergeben.

Weiterreichende Anpassung kann die Klimarisiken im optimistischen Fall überwiegend auf ein geringes Ausmaß reduzieren. Auch steigende Klimarisiken können durch weiterreichende Anpassung kompensiert werden. In manchen Fällen zeigt sich erneut ein relativ großes Anpassungspotenzial im Verhältnis zum Klimarisiko. Neben den zuvor genannten Klimawirkungen trifft dies außerdem auf „Abiotischen Stress (Pflanzen)“ und „Ertragsausfälle“ (Handlungsfeld „Landwirtschaft“) sowie „Überlastung der Entwässerungseinrichtungen in überflutungsgefährdeten Gebieten“ zu.

#### *Mitte des Jahrhunderts, pessimistischer Fall*

Im pessimistischen Fall wird auch nach Umsetzung der beschlossenen Maßnahmen bis 2060 fast durchweg eine Steigerung der Klimarisiken gegenüber der gegenwärtigen Situation angenommen. Obwohl die Wirksamkeit der beschlossenen Maßnahmen bei etlichen Klimawirkungen zumindest auf gering-mittel, teils sogar auf mittel, eingeschätzt wird, ergeben sich mehrheitlich mittel-hohe und hohe Restrisiken, da für den pessimistischen Fall von einem stärkeren Klimawandel ausgegangen wird. Die mit Anpassung verbleibenden Klimarisiken können dadurch gegenüber der gegenwärtigen Situation deutlich zunehmen und die beschlossenen Maßnahmen (APA III) allein können dies in den meisten Fällen nur bedingt oder auch gar nicht ausgleichen.

Nur in wenigen Einzelfällen deutet sich nach Umsetzung der beschlossenen Maßnahmen eine Verbesserung gegenüber der gegenwärtigen Risikosituation („Belastung oder Versagen von Hochwasserschutzsystemen“) oder zumindest keine Verschlechterung gegenüber der gegenwärtigen Risikosituation („Schiffbarkeit der Binnenschiffahrtsstraßen (Niedrigwasser)“) oder ein deutlich geringeres Risiko, als es für den pessimistischen Fall zur Mitte des Jahrhunderts ohne Anpassung anzunehmen wäre („Allergische Reaktionen durch Aeroallergene pflanzlicher Herkunft (z. B. Pollen)“), an.

Durch Umsetzung und Wirksamwerden weiterreichender Anpassung kann sich das Bild gegenüber den Klimarisiken nach Anwendung der im APA III vorgesehenen Anpassungsmaßnahmen insofern verändern, als dass das Risikoniveau insgesamt, also über alle ausgewählten Klimawirkungen hinweg, fast überall geringer ist. Bis auf eine Ausnahme kämen keine hohen Risiken mehr vor und der Anteil der mittleren (und gering-mittleren) Risiken wäre höher. Klimarisiken, für die technische und bauliche Weiterentwicklungen, Forschungsfortschritte oder Verbesserungen im Wassermanagement Anpassung begünstigen (Infrastruktur-bezogene Klimawirkungen, Gesundheit, Landwirtschaft, zum Teil Biologische Vielfalt und Boden), können auf einem mittleren und teils gering-mittleren Ausmaß gehalten werden. Durch weiterreichende Maßnahmen können die Restrisiken nach beschlossenen Maßnahmen reduziert werden, aber nicht auf das Niveau der gegenwärtigen Klimarisiken ohne Anpassung. Eine Verbesserung gegenüber der Gegenwart durch das Wirksamwerden weiterreichender Anpassung kann sich lediglich für einzelne Risiken ergeben, denen mit Wasserbewirtschaftung und Flussbaumaßnahmen beziehungsweise mit gezielter Vorbeugung begegnet werden kann, wie „Überlastung der Entwässerungseinrichtungen in überflutungsgefährdeten Gebieten“, „Belastung oder Versagen von Hochwasserschutzsystemen“ sowie „Schiffbarkeit der Binnenschiffahrtsstraßen (Niedrigwasser)“. Im Fall der „Hitzebelastung“ (Handlungsfeld „Menschliche Gesundheit“) kann durch weiterreichende Anpassung bis 2060 eine Reduzierung des heute bereits hohen Risikos vollzogen werden, trotz des voranschreitenden Klimawandels. Entscheidend sind hierbei die weitere Verbreitung und Nutzung von Hitzeaktionsplänen und eine klare Zuständigkeitsregelung und Akteursvernetzung in diesem Zusammenhang sowie Maßnahmen zum Schutz besonders vulnerabler Gruppen und der Ausbau von Akutmaßnahmen.

Mittel-hohe Klimarisiken – und damit deutliche höhere Risiken als gegenwärtig – werden auch mit weiterreichender Anpassung im pessimistischen Fall angenommen, wenn ein enger Bezug der Klimawirkung zu natürlichen Systemen oder zur Verfügbarkeit natürlicher Ressourcen, insbesondere Wasser, oder Anfälligkeit für Hitze- und Trockenschädigung besteht. Dies betrifft insbesondere Wälder, bestimmte marine/aquatische Lebensräume und -gemeinschaften, Böden sowie Grundwasserstände. Mittel-hohe Risiken ergeben sich außerdem bei Klimawirkungen, die durch Extremereignisse, beispielsweise extreme Niederschläge, hervorgerufen werden. Heute absehbare weiterreichende Anpassung kann solche Risiken – zum Beispiel Sturzfluten und Bodenerosion durch Wasser – nur mit begrenzter Wirksamkeit reduzieren.

Da sich die Klimarisiken vorrangig bei natürlichen Systemen wie Wäldern, Böden, terrestrischen oder aquatischen Ökosystemen auch durch weiterreichende Anpassung nicht oder kaum reduzieren lassen, ist es ratsam, hier Beeinträchtigungen in Folge von anthropogener (Über-)Nutzung zu minimieren, um die Resilienz dieser Systeme zu stärken. Die mittel-hohen und hohen Klimarisiken, die insbesondere im pessimistischen Fall auch nach weiterreichender Anpassung in diesen Fällen bestehen, sind zudem ein Zeichen für die geringe Effektivität von Anpassung bei einem starken Klimawandel. Für diesen Fall wird von einer starken Schädigung der Systeme ausgegangen, sodass sich Anpassungsmaßnahmen nicht/kaum entfalten können. Dies unterstreicht die Notwendigkeit von Klimaschutzmaßnahmen für eine effektive Anpassung.



**Tabelle 24: Klimarisiken mit Anpassung auf Ebene der Handlungsfelder**

| Klimawirkung                                                                   | Klimarisiken ohne Anpassung |                        |               | Klimarisiken mit Anpassung            |                        |                                |              |               | Gewissheit der Bewertung (Klimarisiken mit Anpassung) |                        |
|--------------------------------------------------------------------------------|-----------------------------|------------------------|---------------|---------------------------------------|------------------------|--------------------------------|--------------|---------------|-------------------------------------------------------|------------------------|
|                                                                                |                             |                        |               | mit beschlossenen Maßnahmen (APA III) |                        | mit weiterreichender Anpassung |              |               |                                                       |                        |
|                                                                                | Gegenwart                   | Mitte des Jahrhunderts |               | 2020-2030                             | Mitte des Jahrhunderts |                                |              |               | 2020-2031                                             | Mitte des Jahrhunderts |
|                                                                                |                             | Optimistisch           | Pessimistisch |                                       | Optimistisch           | Pessimistisch                  | Optimistisch | Pessimistisch |                                                       |                        |
| <b>Landwirtschaft</b>                                                          |                             |                        |               |                                       |                        |                                |              |               |                                                       |                        |
| Abiotischer Stress (Pflanzen)                                                  | mittel                      | mittel                 | hoch          | mittel                                | mittel                 | hoch                           | gering       | mittel        | mittel                                                | mittel                 |
| Ertragsausfälle                                                                | mittel                      | mittel                 | hoch          | mittel                                | gering-mittel          | mittel-hoch                    | gering       | mittel        | mittel                                                | mittel                 |
| <b>Wald- und Forstwirtschaft</b>                                               |                             |                        |               |                                       |                        |                                |              |               |                                                       |                        |
| Hitze- und Trockenstress                                                       | mittel                      | mittel                 | hoch          | mittel                                | gering                 | mittel-hoch                    | gering       | mittel-hoch   | mittel                                                | gering                 |
| Stress durch Schädlinge/Krankheiten                                            | mittel                      | mittel                 | hoch          | mittel                                | gering-mittel          | mittel-hoch                    | gering       | mittel-hoch   | mittel                                                | gering                 |
| Waldbrandrisiko                                                                | gering                      | gering                 | mittel        | gering                                | gering                 | mittel                         | gering       | gering-mittel | mittel                                                | gering                 |
| Nutzfunktion: Holztrag                                                         | mittel                      | mittel                 | hoch          | mittel                                | gering                 | mittel-hoch                    | gering       | mittel-hoch   | mittel                                                | gering                 |
| <b>Biologische Vielfalt</b>                                                    |                             |                        |               |                                       |                        |                                |              |               |                                                       |                        |
| Ausbreitung invasiver Arten                                                    | mittel                      | mittel                 | hoch          | mittel                                | gering-mittel          | hoch                           | gering       | mittel-hoch   | mittel                                                | mittel                 |
| Verlust an genetischer Vielfalt                                                | gering                      | gering                 | mittel        | gering                                | gering                 | mittel                         | gering       | gering-mittel | mittel                                                | gering                 |
| Verschiebung von Arealen und Rückgang der Bestände                             | gering                      | mittel                 | mittel        | gering                                | gering-mittel          | mittel                         | gering       | gering-mittel | gering                                                | gering                 |
| Schäden an wassergebundenen Habitaten und Feuchtgebieten                       | mittel                      | mittel                 | hoch          | mittel                                | gering-mittel          | mittel-hoch                    | gering       | mittel        | mittel                                                | gering                 |
| Schäden an Wäldern                                                             | mittel                      | mittel                 | hoch          | mittel                                | gering-mittel          | mittel-hoch                    | gering       | mittel-hoch   | mittel                                                | gering                 |
| <b>Boden</b>                                                                   |                             |                        |               |                                       |                        |                                |              |               |                                                       |                        |
| Bodenerosion durch Wasser                                                      | mittel                      | mittel                 | hoch          | mittel                                | gering-mittel          | mittel-hoch                    | gering       | mittel-hoch   | mittel                                                | gering                 |
| Wassermangel im Boden                                                          | mittel                      | mittel                 | hoch          | mittel                                | gering-mittel          | mittel-hoch                    | gering       | mittel        | mittel                                                | gering                 |
| Bodenerosion durch Wind                                                        | mittel                      | mittel                 | hoch          | mittel                                | mittel                 | hoch                           | gering       | mittel        | mittel                                                | gering                 |
| Produktionsfunktionen                                                          | mittel                      | mittel                 | hoch          | mittel                                | gering-mittel          | mittel-hoch                    | gering       | mittel-hoch   | gering                                                | gering                 |
| <b>Fischerei</b>                                                               |                             |                        |               |                                       |                        |                                |              |               |                                                       |                        |
| Entkopplung von Nahrungsbeziehungen in der Ostsee                              | mittel                      | hoch                   | hoch          | mittel                                | hoch                   | hoch                           | mittel       | mittel-hoch   | mittel                                                | sehr gering            |
| Verbreitung von Fischarten in Fließgewässern                                   | gering                      | mittel                 | hoch          | gering                                | gering-mittel          | mittel-hoch                    | gering       | mittel-hoch   | mittel                                                | gering                 |
| <b>Küsten- und Meeresschutz</b>                                                |                             |                        |               |                                       |                        |                                |              |               |                                                       |                        |
| Wasserqualität und Grundwasserversalzung                                       | mittel                      | mittel                 | hoch          | mittel                                | gering-mittel          | mittel-hoch                    | gering       | mittel        | mittel                                                | mittel                 |
| Naturräumliche Veränderungen an Küsten                                         | mittel                      | mittel                 | hoch          | mittel                                | mittel                 | hoch                           | gering       | mittel        | mittel                                                | mittel                 |
| Überlastung der Entwässerungseinrichtungen in überflutungsgefährdeten Gebieten | mittel                      | mittel                 | hoch          | gering-mittel                         | gering-mittel          | mittel-hoch                    | gering       | gering-mittel | hoch                                                  | mittel                 |

| Klimawirkung                                                                         | Klimarisiken ohne Anpassung |                        |              | Klimarisiken mit Anpassung            |                        |                                |               |               | Gewissheit der Bewertung (Klimarisiken mit Anpassung) |                        |
|--------------------------------------------------------------------------------------|-----------------------------|------------------------|--------------|---------------------------------------|------------------------|--------------------------------|---------------|---------------|-------------------------------------------------------|------------------------|
|                                                                                      |                             |                        |              | mit beschlossenen Maßnahmen (APA III) |                        | mit weiterreichender Anpassung |               |               |                                                       |                        |
|                                                                                      | Gegenwart                   | Mitte des Jahrhunderts |              | 2020-2030                             | Mitte des Jahrhunderts |                                |               |               | 2020-2031                                             | Mitte des Jahrhunderts |
| Optimistisch                                                                         |                             | Pessimistisch          | Optimistisch |                                       | Pessimistisch          | Optimistisch                   | Pessimistisch |               |                                                       |                        |
| <b>Wasserhaushalt, Wasserwirtschaft</b>                                              |                             |                        |              |                                       |                        |                                |               |               |                                                       |                        |
| Belastung oder Versagen von Hochwasserschutzsystemen                                 | mittel                      | mittel                 | hoch         | gering-mittel                         | gering                 | gering-mittel                  | gering        | gering-mittel | mittel                                                | gering                 |
| Sturzfluten (Versagen von Entwässerungseinrichtungen und Überflutungsschutzsystemen) | mittel                      | mittel                 | hoch         | mittel                                | mittel                 | hoch                           | gering-mittel | mittel-hoch   | gering                                                | gering                 |
| Gewässertemperatur und Eisbedeckung und biologische Wasserqualität                   | mittel                      | mittel                 | hoch         | mittel                                | gering-mittel          | hoch                           | gering        | mittel        | mittel                                                | mittel                 |
| Grundwasserstand und Grundwasserqualität                                             | gering                      | gering                 | hoch         | gering                                | gering                 | hoch                           | gering        | hoch          | gering                                                | gering                 |
| <b>Verkehr, Verkehrsinfrastruktur</b>                                                |                             |                        |              |                                       |                        |                                |               |               |                                                       |                        |
| Schiffbarkeit der Binnenschiffahrtsstraßen (Niedrigwasser)                           | mittel                      | mittel                 | hoch         | gering                                | gering                 | mittel                         | gering        | gering        | hoch                                                  | hoch                   |
| <b>Bauwesen</b>                                                                      |                             |                        |              |                                       |                        |                                |               |               |                                                       |                        |
| Schäden an Gebäuden aufgrund von Flusshochwasser                                     | mittel                      | mittel                 | hoch         | mittel                                | gering-mittel          | mittel-hoch                    | gering        | mittel        | mittel                                                | mittel                 |
| Vegetation in Siedlungen                                                             | gering                      | mittel                 | mittel       | gering                                | gering-mittel          | mittel                         | gering        | gering-mittel | hoch                                                  | mittel                 |
| Stadtklima/Wärmeinseln                                                               | mittel                      | mittel                 | hoch         | gering-mittel                         | gering                 | mittel-hoch                    | gering        | mittel        | mittel                                                | mittel                 |
| <b>Industrie und Gewerbe</b>                                                         |                             |                        |              |                                       |                        |                                |               |               |                                                       |                        |
| Beeinträchtigung der Versorgung mit Rohstoffen und Zwischenprodukten (international) | mittel                      | mittel                 | hoch         | mittel                                | mittel                 | hoch                           | gering        | mittel-hoch   | hoch                                                  | mittel                 |
| Beeinträchtigung des Warenverkehrs über Wasserstraßen (Inland)                       | mittel                      | mittel                 | hoch         | gering                                | gering                 | mittel-hoch                    | gering        | mittel        | hoch                                                  | mittel                 |
| <b>Menschliche Gesundheit</b>                                                        |                             |                        |              |                                       |                        |                                |               |               |                                                       |                        |
| Hitzebelastung                                                                       | hoch                        | mittel                 | hoch         | mittel-hoch                           | gering                 | mittel-hoch                    | gering        | mittel        | mittel                                                | mittel                 |
| UV-bedingte Gesundheitsschädigungen (insb. Hautkrebs)                                | mittel                      | mittel                 | hoch         | gering-mittel                         | gering-mittel          | mittel-hoch                    | gering        | mittel        | mittel                                                | mittel                 |
| Allergische Reaktionen durch Aeroallergene pflanzlicher Herkunft (z. B. Pollen)      | gering                      | mittel                 | hoch         | gering                                | gering                 | mittel                         | gering        | mittel        | gering                                                | gering                 |

### Vergleich der Klimarisiken mit Anpassung bezogen auf die betroffenen Systeme

Mit Blick auf die betroffenen Systeme lässt sich feststellen, dass das Anpassungspotenzial bei den zehn untersuchten Klimawirkungen aus dem Bereich der natürlichen Systeme und Ressourcen bei beschlossenen Maßnahmen (APA III) nur gering oder gering-mittel und bei weiterreichender Anpassung gering-mittel oder mittel ist. Dies ist im Verhältnis zu den relativ hohen Risiken und auch im Vergleich zu den anderen betroffenen Systemen relativ wenig. Zugleich haben die meisten betroffenen Systeme eine mittlere (zehn bis 50 Jahre) und teils sogar lange Anpassungsdauer (über 50 Jahre). Daher bleiben auch bei sechs Klimawirkungen die Restrisiken nach weiterreichender Anpassung mittel-hoch im pessimistischen Fall in der Mitte des Jahrhunderts. Dies betrifft die Handlungsfelder „Boden“, „Biologische Vielfalt“ und „Wasserhaushalt, Wasserwirtschaft“ mit den Klimawirkungen „Bodenerosion durch Wasser“, „Produktionsfunktionen“ (Boden), „Ausbreitung invasiver Arten“, „Schäden an Wäldern“, „Sturzfluten (Versagen von Entwässerungseinrichtungen und Überflutungsschutzsystemen)“. Das Restrisiko der Klimawirkung „Grundwasserstand und Grundwasserqualität“ bleibt sogar hoch. Drei weitere Klimawirkungen

wurden nicht hinsichtlich der Anpassungskapazität untersucht, da bei ihnen kaum Anpassungspotenziale gesehen wurden (siehe unten „Grenzen der Anpassung“). Dies betrifft ebenfalls Klimawirkungen mit hohen Risiken im Handlungsfeld „Biologische Vielfalt“ („Veränderung der Länge der Vegetationsperiode und Phänologie“ und „Schäden an Gebirgsökosystemen“) sowie eine Klimawirkung mit mittlerem Risiko im Handlungsfeld „Boden“ („Bodenbiologie“). Auch dies unterstreicht die teilweise sehr geringen Anpassungspotenziale bei natürlichen Systemen und Ressourcen.

Die Anpassungspotenziale bei den elf untersuchten Klimawirkungen im Bereich der naturnutzenden Wirtschaftssysteme sind teils deutlich höher: die Wirksamkeit der beschlossenen Maßnahmen (APA III) wurde größtenteils mit gering-mittel bewertet und die der weiterreichenden Anpassung sogar mit mittel oder mittel-hoch. Trotzdem sind auch hier bei fünf Klimawirkungen trotz weiterreichender Anpassung mittel-hohe Restrisiken bereits in der Mitte des Jahrhunderts im pessimistischen Fall im Handlungsfeld „Wald- und Forstwirtschaft“ („Hitze und Trockenstress im Wald“, „Nutzfunktion: Holzertrag“, „Stress durch Schädlinge/Krankheiten“) sowie im Handlungsfeld „Fischerei“ („Entkopplung von Nahrungsbeziehungen in der Ostsee“, „Verbreitung von Fischarten in Fließgewässern“) zu erwarten. Dies hängt auch mit der teils langen Anpassungsdauer der betroffenen Systeme zusammen.

Bei Infrastrukturen und Gebäuden und den naturfernen Wirtschaftssystemen sind, wie zu erwarten, die Anpassungspotenziale ebenfalls höher als bei den natürlichen Systemen und für die beschlossenen Maßnahmen (APA III) sogar höher als bei den naturnutzenden Systemen. Bei den sechs untersuchten Klimawirkungen wird die Wirksamkeit der beschlossenen Maßnahmen (APA III) gering-mittel oder mittel-hoch und die der weiterreichenden Anpassung mittel oder mittel-hoch eingeschätzt. Die Anpassungsdauer der Systeme ist größtenteils kurz oder mittel, das heißt unter 50 Jahre. Durch Anpassung kann daher bei allen untersuchten Klimawirkungen auch im pessimistischen Fall in der Mitte des Jahrhunderts das Klimarisiko auf mittel oder niedriger reduziert werden.

Auch die Anpassungskapazität der menschlichen und sozialen (auf das menschliche Wohlergehen bezogenen) Systeme ist höher als die der natürlichen Systeme. Die drei untersuchten Klimawirkungen zeigten bei den beschlossenen Maßnahmen eine gering-mittlere oder mittlere Wirksamkeit und bei der weiterreichenden Anpassung eine mittlere Wirksamkeit. Hier ist die Anpassungsdauer sogar größtenteils kurz, das heißt sie liegt unter zehn Jahren, sodass die Systeme relativ schnell verändert werden können. Auch hier können durch Anpassung alle Restrisiken der untersuchten Klimawirkungen auch im pessimistischen Fall in der Mitte des Jahrhunderts auf mittel und niedriger reduziert werden.

### **Gewissheit**

Analog zur Einschätzung der Gewissheit im Rahmen der Bewertung der Klimarisiken (siehe 3.3 und Teilbericht 1, „Klimaprojektionen“) wurde auch bei der Bewertung der Anpassungskapazität angegeben, wie gewiss/sicher die jeweiligen Aussagen zur Wirksamkeit der Anpassung waren. Die Einschätzung der Gewissheit stützte sich vor allem auf das Vorhandensein von Informationen und die Zuverlässigkeit dieser sowie auf Kenntnisse über Wirkzusammenhänge. Es wurde unterschieden zwischen einer sehr geringen, einer geringen, mittleren und hohen Gewissheit (für die Definition des Wertebereichs siehe Kapitel „Konzept und Methodik“, Teilbericht 1). Die Einschätzungen zur Gewissheit der Bewertung der Anpassungskapazität beziehen sich auf die Zeiträume 2020 bis 2030 und 2031 bis 2060 (Mitte des Jahrhunderts).

Insgesamt lässt sich feststellen, dass die Einschätzung der Wirksamkeit des jeweiligen Maßnahmenbündels je Zeitraum umso weniger gewiss ist, je komplexer die in den Anpassungsmaßnahmen enthaltenen Wirkzusammenhänge sind. Tendenziell sind die Aussagen zur Wirksamkeit der

Anpassung für den Zeitraum Mitte des Jahrhunderts (2031 bis 2060) ungewisser als für das unmittelbar bevorstehende Jahrzehnt (2020 bis 2030).

Auf der Ebene der Handlungsfelder wurden die Aussagen zu den Klimarisiken mit Anpassung für die unmittelbare Zukunft (2020 bis 2030) in fast allen Handlungsfeldern mit mittlerer Gewissheit getroffen und für die Mitte des Jahrhunderts mit geringer Gewissheit. Lediglich im Handlungsfeld „Tourismuswirtschaft“ ist die Unsicherheit größer, da hier ökologische, soziodemographische und sozioökonomische Faktoren eng ineinandergreifen, sowohl die Angebots- als auch die Nachfrageseite zu berücksichtigen sind und zusätzlich eine hohe Heterogenität und Dynamik herrscht.

In der Gesamtbetrachtung der Gewissheitseinschätzungen auf Ebene der Klimawirkungen zeigt sich, dass Aussagen zur Wirksamkeit von Anpassungsmaßnahmen zur Reduzierung der Klimarisiken für die unmittelbare Zukunft (bis 2030) überwiegend mit mittlerer, teils sogar mit hoher Gewissheit getroffen wurden. Letzteres betrifft Anpassungsmaßnahmen, deren Wirkmechanismen relativ eindeutig sind oder die sich bereits in Umsetzung befinden. Für den Zeitraum Mitte des Jahrhunderts fiel die Gewissheit der Aussagen zur Wirksamkeit der Anpassung häufiger gering aus, anders als dies etwa bei der Einschätzung der Gewissheit der Bewertung des Klimarisikos ohne Anpassung zur Mitte des Jahrhunderts der Fall war. Die systemisch bedingte höhere Komplexität bei Fragen der Anpassung dürfte hier vermutlich eine Rolle spielen.

Insbesondere bei Klimarisiken, die natürliche Systeme betreffen, sind die Aussagen zur Wirksamkeit der Anpassung im Zeitraum Mitte des Jahrhunderts mit größeren Unsicherheiten verbunden. Hier sind die Wirkzusammenhänge komplex, Anpassungsmaßnahmen sind (zwangsläufig) darauf ausgelegt, eher auf Teildynamiken einzuwirken, wodurch schwer abschätzbar ist, welche Rolle diese Eingriffe im gesamten betroffenen System spielen und ob dadurch Dynamiken verändert und damit auch Klimarisiken gesenkt werden können. Wenn Anpassung hingegen eher mithilfe des Einsatzes von Technologien ermöglicht werden kann oder von baulichen Lösungen abhängt, wurden Aussagen zur Anpassungskapazität und damit zum Ausmaß der Klimarisiken auch für den zeitlich entfernten Zeitraum (Mitte des Jahrhunderts) mit mittlerer Gewissheit getroffen. Das Verständnis und damit auch die Überschaubarkeit der Wirkzusammenhänge sind hier ausgeprägter, da Maßnahmen angewandt werden können, deren grundsätzliche Funktionsweise bekannt (erprobt) ist (zum Beispiel bestimmte fluss-/bauliche Hochwasserschutzmaßnahmen oder Techniken zum Schutz vor Überflutung oder baulich-technische Lösungen im Umgang mit Niedrigwasser oder Maßnahmen zur Bewusstseinssteigerung, gesundheitlichen Aufklärung oder Gesundheits-Monitoring).

### **Grenzen der Anpassung und tiefgreifende Anpassung**

Mit Blick auf die Anpassungskapazität gegenüber Klimarisiken sind in verschiedener Hinsicht Grenzen festzustellen. Dabei können absolute und relative Grenzen unterschieden werden. Außerdem kämen bei bestimmten Klimawirkungen zur gezielten Risikoreduzierung lediglich Klimaschutzstrategien und -maßnahmen in Betracht. Dies trifft auf die rein vorgelagerten Klimawirkungen zu, die physische Effekte darstellen und direkt von Änderungen der klimatischen Einflüsse ausgelöst werden, also „Meerestemperatur und Eisbedeckung“, „Meeresspiegelhöhe“, „Strömungen und Gezeitendynamik“, „Seegang“, „Sturmfluten“, „Niedrigwasser“, „Hochwasser“ sowie „Sickerwasser“ und „Vernässung“. Diese wurden folglich bei der Analyse der Anpassungskapazitäten trotz größtenteils hohen Klimarisiken nicht berücksichtigt.

Absolute (oder natürliche) Grenzen betreffen die physische Anpassungsfähigkeit von Organismen und/oder Ökosystemen, also etwa thermische Belastungsgrenzen oder Grenzen der Trockenheitstoleranz von Organismen (Mathey et al. 2011). Eine absolute Grenze der Anpassungs-



fähigkeit kann auch erreicht werden, wenn für die betroffenen Arten keine Ausweichmöglichkeiten bestehen (Bröcker et al. 2011) und auch künstlich (durch externe Eingriffe des Menschen) nicht geschaffen werden können, zum Beispiel wenn Gewässer trotz Grabungen für Tiefenwasserströme trockenfallen oder sich verbleibende Gewässerabschnitte so extrem erwärmen, dass Maßnahmen nicht genügen, um Fischsterben zu verhindern (Basen und Brinker 2019), wie beim Äschenbestand im Schweizer Oberrhein (Wirth 2019). An solche absoluten Grenzen können auch Arten in Hochgebirgsarealen und oberen Mittelgebirgslagen geraten oder hoch spezialisierte Arten, die ökologische Nischen besetzen und deren Lebensräume klimawandelbedingt verschwinden (würden). Ähnliches gilt, wenn klimawandelbedingt sogenannte Mismatches auftreten, also bestimmte Arten ausfallen oder sich Vegetationsperioden oder phänologische Phasen so verschieben, dass daran angepasste beziehungsweise in der Nahrungskette nachgelagerte Arten so massiv betroffen sind, dass Anpassung nicht möglich ist. Da die Klimawirkungen „Veränderung der Länge der Vegetationsperiode und Phänologie“ und „Schäden an Gebirgsökosystemen“ im Handlungsfeld „Biologische Vielfalt“ aufgrund hoher Klimarisiken in der Mitte des Jahrhunderts auf solche absoluten Grenzen stoßen können und keine Anpassungsoptionen gesehen werden, wurden diese nicht auf Anpassungskapazität hin untersucht. Weitere absolute Grenzen der Anpassung treten beim Erhalt der genetischen Vielfalt durch ex-situ-Optionen zutage, wie bei der Klimawirkung „Verlust an genetischer Vielfalt“. Natürlich bedingt können solche Maßnahmen nicht bei Arten greifen, die nur selten oder gar keine Samen ausbilden oder in Fließgewässern vorkommen. Auch der Erhalt in Genbanken ist begrenzt, da bei einigen Arten eine Tiefkühlung nicht möglich ist. (Natürlich) Begrenzt sind auch Maßnahmen zur Anpassung an die klimawandelbedingte Herabsetzung der biologischen Aktivität im Boden und der biologischen Funktionalität des Bodens, wie bei der Klimawirkung „Bodenbiologie“. Zwar kann die Aktivität der Bodenlebewesen durch angepasste Landnutzung und Bodenbearbeitungsintensität gefördert beziehungsweise deren Schädigung und Inaktivität entgegengewirkt werden, aber den weitaus größeren Hebel bietet hier die Umsetzung von Klimaschutzmaßnahmen. Zum einen beeinträchtigen extreme Witterungsbedingungen wie längere Trockenperioden bei gleichzeitiger Hitze oder höhere Niederschlagsmengen im Winter die Aktivität der Bodenlebewesen enorm, was die Zersetzung stark einschränkt. Zum anderen könnten höhere Kohlenstoffdioxidkonzentrationen in der Atmosphäre zu einer verlangsamten Zersetzung der organischen Substanz und einer Reduzierung der bodenbiologischen Funktionalität führen (Cousteaux und Bolger 2000; Storch et al. 2018). Klimaanpassung kann hier an (absolute/natürliche) Grenzen stoßen.

Darüber hinaus kann das Fehlen natürlicher Ressourcen wie Wasser oder Boden/Sedimenten eine absolute Grenze für bestimmte Anpassungsmaßnahmen darstellen, beispielsweise Bewässerung oder Sedimentmanagement, Deicherhöhung oder -verbreiterung (Sanchez-Arcilla 2016). Bei solchen mit der Verfügbarkeit natürlicher Ressourcen verknüpften Grenzen ist die Unterscheidung zwischen absoluter und relativer Grenze jedoch nicht ganz eindeutig, denn häufig spielen dabei auch Fragen der Rentabilität, also die Abwägung zwischen ökonomischen und ökologischen Prioritäten und demnach normative Setzungen eine Rolle.

Grenzen der Anpassungskapazität sind dann als relativ zu verstehen, wenn sie von Prioritäten(-setzung), finanziellen oder personellen Kapazitäten, Akzeptanz(-mangel), konkurrierenden Nutzungsinteressen, Rentabilitätsüberlegungen, Eigentumsstrukturen oder Zielkonflikten abhängen, sodass von verschiebbaren Grenzen (beziehungsweise Hindernissen) zu sprechen wäre. Dementsprechend können die auf Bundesebene beschlossenen Maßnahmen (APA III) nur ein bestimmtes Ausmaß von Anpassung erreichen, weil der Bund bei vielen Klimawirkungen nicht der wichtigste Akteur ist. Diesem Teil der Anpassungskapazität sind also relative Grenzen gesetzt, sodass es weiterreichender Anpassung unter Beteiligung anderer Akteure bedarf. Insbesondere um Klimarisiken im Bereich der natürlichen Systeme und natürliche Ressourcen nut-



zenden Systeme zu reduzieren, sind – im Sinne der weiterreichenden Anpassung – beispielsweise weitere Akteursgruppen (außer der Bundesebene) einzubeziehen, mehr (finanzielle und personelle) Ressourcen zu mobilisieren oder Bewusstsein und Akzeptanz in der Bevölkerung zu steigern. Jedoch kann auch weiterreichende Anpassung an (wenngleich immer noch relative) Grenzen geraten. Gründe dafür können Zielkonflikte sein, die auf normativen Setzungen beruhen, also entsprechend schwierig (und/oder langsam) aufzulösen sind. Exemplarisch steht dafür der Einsatz von Pflanzenschutzmitteln oder neuen Arten in der Land- und Forstwirtschaft, um ein, durch trockenheit- und hitzebedingte Schwächung bestimmter Arten oder Kulturen erhöhtes, Schaderregerbefallrisiko zu reduzieren, was wiederum das Risiko birgt, die heimische biologische Vielfalt zu schädigen.

Eine weitere (relative) Grenze weiterreichender Anpassung erwächst aus der begrenzten Flächen- und/oder Wasserverfügbarkeit und konkurrierenden Nutzungsansprüchen. Wenn aufgrund dessen über ein bestimmtes Ausmaß der Klimarisikoreduzierung durch weiterreichende Anpassung nicht hinausgegangen werden kann, können tiefgreifendere Veränderungen mithilfe transformativer Anpassung oder einer transformationsorientierten Herangehensweise erwogen werden. So wird aus verschiedenen Gründen bei elf Klimawirkungen trotz weiterreichender Anpassung bereits Mitte des Jahrhunderts, ein mittel-hohes bis hohes Klimarisiko erwartet. Dies betrifft natürliche und naturnutzende Systeme in den Handlungsfeldern „Boden“, „Biologische Vielfalt“, „Wasserhaushalt, Wasserwirtschaft“, „Wald- und Forstwirtschaft“ sowie „Fischerei“.

Ein einheitliches allgemeines Verständnis oder ein solches Konzept von transformativer Anpassung existieren bisher nicht. Im Rahmen der KWRA 2021 werden darunter Handlungsansätze verstanden, die aktuelle Systemgrenzen (das, was unter aktuellen politischen Rahmenbedingungen für plausibel gehalten wird) überschreiten, also über die Möglichkeiten der (weiterreichenden) Anpassung noch hinausgehen. Im Unterschied zu weiterreichender Anpassung kann transformative Anpassung also beispielsweise die folgenden Ansätze oder tiefgreifenden Veränderungen umfassen:

Mit Blick auf die natürlichen Systeme und Ressourcen würde die drastische Minderung (beziehungsweise Beendigung) der systemschädigenden (Über-)Beanspruchung natürlicher Ressourcen eine transformative Herangehensweise an Klimawandelanpassung darstellen, um die Resilienz von Ökosystemen gegenüber klimawandelbedingten Veränderungen zu erhöhen. Konkret könnte dies beispielsweise die Form vollständiger Revitalisierungen von Ökosystemen annehmen, die über punktuelle und kleinräumige Renaturierungsmaßnahmen hinausgeht (beispielsweise Revitalisierung ganzer Flusssysteme, höherer Anteil nicht bewirtschafteter Wälder). Dementsprechend fielen unter transformative Anpassung auch die stärkere Gewichtung ökologischer Belange gegenüber ökonomischen Interessen.

Hinsichtlich menschlicher Nutzungsformen von natürlichen Systemen (naturnutzende Wirtschaftssysteme) könnte transformative Anpassung unter anderem eine deutliche Stärkung eines ökologischen Landbaus beinhalten, einhergehend mit den erforderlichen tiefgreifenden Veränderungen auf der Nachfrageseite (Bewusstsein, Veränderung von Konsumgewohnheiten, Preisniveau). Im Umgang mit einem geringeren Wasserdargebot entspräche die Erschließung neuer Wasserquellen, etwa Meerwasserentsalzung oder Tiefenwasser, einer transformativen Herangehensweise.

Bezogen auf menschengemachte beziehungsweise künstliche Systeme könnten transformative Anpassungspfade vor allem im Siedlungs-/Städtebau und in der Wirtschaft zum Tragen kommen. Neben der Veränderung von landwirtschaftlichen Anbauformen in hochwasser-/überflutungsgefährdeten Gebieten, könnte man auch die gänzliche Aufgabe landwirtschaftlicher Aktivitäten in solchen Gebieten als transformative Anpassung verstehen. Ähnliches gilt für Siedlungen,

deren Aufgabe oder Rückbau im Sinne einer transformativen Anpassung denkbar wären (wenn Deichneubau oder umfassender Bestandsumbau nicht ausreichen). Der Umbau von Städten würde auf einer transformationsorientierten Herangehensweise („Leben mit Wasser in der Stadt“) basieren, wenn unter anderem eine flächendeckende und umfassende Umsetzung des Schwammstadtkonzepts berücksichtigt würde, also die konsequente Entsiegelung von Flächen, die großflächige Schaffung von blau-grünen Infrastrukturen, Kühlungsstrukturen und multifunktional genutzten (vertikalen und horizontalen) urbanen Flächen. Bezüglich wirtschaftlicher/Handelsbeziehungen könnten transformative Ansätze der Klimawandelanpassung insofern über weiterreichende Anpassung hinausgehen, als dabei eine risikobezogene Ausrichtung der nationalen und regionalen (europäischen) Handelspolitik Berücksichtigung findet und dezentrale (und, womöglich, re-regionalisierte) Handelsbeziehungen und eine Angleichung der Marktmacht in den Fokus rücken.

Insgesamt zeigt sich, dass technisch etliche Möglichkeiten der Anpassung (weiterreichend und transformativ) bestehen, zumindest sofern auch der politische und gesellschaftliche Wille besteht, die nötige lokale Akzeptanz vorhanden ist (oder geschaffen werden kann) und finanzielle Ressourcen zur Verfügung gestellt werden. Nichtsdestotrotz können in manchen Bereichen – absolute – Grenzen der Anpassung erreicht werden.

#### Kernaussagen zu Klimawirkungen mit Anpassung

- ▶ Die Einschätzung der beschlossenen Anpassungsmaßnahmen (APA III) des Bundes deuten darauf hin, dass diese bis Mitte des Jahrhunderts vielfach eine begrenzte Wirksamkeit erzielen. Für darüberhinausgehende Anpassungserfolge bedarf es insbesondere auch der Anpassungsleistung anderer Akteure. Die beschlossenen Maßnahmen (APA III) umfassen häufig Instrumente und Maßnahmen, die wichtige Grundlagen für eine wirksame Anpassung liefern (zur Kooperation und Kommunikation oder Forschung), aber alleine nicht ausreichen.
- ▶ Die Potenziale der beschlossenen Maßnahmen (APA III) werden bei Infrastrukturen und Gebäuden sowie menschlichen und sozialen Systemen als relativ hoch eingeschätzt. Bei natürlichen Systemen und naturnutzenden Wirtschaftssystemen können die Restrisiken nach den beschlossenen Anpassungsmaßnahmen jedoch relativ hoch bleiben, und es besteht die Notwendigkeit weiterreichender Anpassung.
- ▶ Ein deutliches Potenzial weiterreichender Anpassung zur Risikoreduzierung, sowohl absolut gesehen als auch relativ zu dem, was durch beschlossene Maßnahmen (APA III) bereits möglich ist, wird im optimistischen Fall bei den Klimarisiken „Abiotischer Stress (Pflanzen)“ und „Ertragsausfälle“ (Landwirtschaft) sowie „Überlastung von Entwässerungseinrichtungen in überflutungsgefährdeten Gebieten“ erwartet.
- ▶ Geringes (zusätzliches) Anpassungspotenzial (durch weiterreichende Anpassung) wird im pessimistischen Fall in den Handlungsfeldern „Biologische Vielfalt“, „Wald- und Forstwirtschaft“, „Fischerei“ und „Bauwesen“ gesehen sowie bei einzelnen Klimawirkungen im Handlungsfeld „Boden“ und bei der Klimawirkung „Grundwasserstand und Grundwasserqualität“.
- ▶ Relativ hohe Restrisiken werden trotz weiterreichender Anpassung bei Klimawirkungen erwartet, bei denen entweder Starkregen oder eine verminderte Wasserverfügbarkeit infolge von Hitze und Trockenheit sowie Folgeschädigungen eine Rolle spielen, wie in den Handlungsfeldern „Wasserhaushalt, Wasserwirtschaft“, „Boden“, „Wald- und Forstwirtschaft“, oder bei Klimawirkungen auf komplexe natürliche Systeme wie in den Handlungsfeldern „Biologische Vielfalt“ und „Fischerei“.

- ▶ Relativ hohe Restrisiken nach weiterreichender Anpassung (im pessimistischen Fall) weisen auf die geringe Effektivität von Anpassung bei einem starken Klimawandel hin, da die betroffenen (natürlichen) Systeme dadurch so geschädigt oder verändert werden können, dass sich aus heutiger Sicht plausible Anpassungsmaßnahmen kaum entfalten können. Angesichts dessen sollten durch anthropogene (Über-)Nutzung bedingte Beeinträchtigungen minimiert werden, um die Resilienz dieser Systeme zu stärken.
- ▶ Die Reduktion der Wirksamkeit von Anpassungsmaßnahmen und die hohen Unterschiede bei den Restrisiken zwischen dem optimistischen und dem pessimistischen Fall unterstreichen die Notwendigkeit von Klimaschutzmaßnahmen für eine effektive Anpassung.
- ▶ Die Anpassungsdauer wird bei den ausgewählten Klimarisiken fast immer als mittel bis lang eingestuft, das heißt es wird deutlich mehr als zehn Jahre dauern, die Klimarisiken großräumig in Deutschland wirksam zu reduzieren.
- ▶ Bei drei Klimawirkungen im Handlungsfeld „Biologische Vielfalt“ und „Boden“ kann Anpassung aufgrund fehlender Ausweichmöglichkeiten oder physischer Belastungsgrenzen von Organismen an absolute Grenzen der Anpassung stoßen. Bei anderen Klimawirkungen in den Clustern Land und Wasser werden im pessimistischen Fall voraussichtlich transformative Ansätze benötigt, um die Klimarisiken auf mittel oder niedriger zu reduzieren.

## 6 Identifizierung von Handlungserfordernissen

Autoren: Linda Hölscher, Walter Kahlenborn | adelphi, Berlin

Auf Basis der bisherigen Auswertungen lassen sich Aussagen bezüglich zukünftiger Handlungserfordernisse treffen. Zum einen, kann aus der Bewertung der Klimarisiken und der Anpassungsdauer abgeleitet werden, wo besonders dringende Bedürfnisse für zusätzliche Anpassungsaktivitäten bestehen. Zum anderen lässt sich aus der Bewertung der Anpassungskapazität auch ableiten, wie diese Handlungserfordernisse zu charakterisieren sind und in welchen Anpassungsdimensionen Potenzial für zusätzliche Maßnahmen besteht. Die Auswahl, welche Maßnahmen letztendlich geeignet sind für die Anpassung an den Klimawandel, bedarf allerdings noch weiterer Analyseschritte und obliegt der Anpassungsplanung. Im Rahmen der KWRA 2021 werden daher keine konkreten Anpassungsmaßnahmen vorgeschlagen.

### 6.1 Priorisierung von Handlungserfordernissen

#### Priorisierung aufgrund der Bewertungen der Klimarisiken

Um eine präzisere Vorstellung davon zu erhalten, welche Klimawirkungen mit vorrangigen Handlungserfordernissen verknüpft sind, wurde eine Priorisierung der untersuchten Klimawirkungen durchgeführt. Für eine genauere Ausdifferenzierung wurden zwei Priorisierungs-Kategorien definiert: Klimawirkungen mit sehr dringenden Handlungserfordernisse und mit dringenden Handlungserfordernissen.

Die Priorisierung erfolgte auf Basis der Bewertung der Klimarisiken ohne Anpassung sowie den Bewertungen zur Anpassungsdauer. Als Grundlage für die Priorisierung diente die Betrachtung des pessimistischen Falls, da sich aus diesem die deutlicheren Handlungserfordernisse ableiten lassen.

Für die Zuordnung zu den Klimawirkungen mit sehr dringenden Handlungserfordernissen, so dass potenzielle Anpassungsmaßnahmen bereits zum jetzigen Zeitpunkt begonnen werden müssten, wurden folgende Bedingungen zu Grunde gelegt (normative Setzung):

- ▶ Ein Klimarisiko wird bereits in der Gegenwart (bis 2030) als hoch bewertet.
- ▶ Es besteht ein hohes Klimarisiko in der Mitte des Jahrhunderts bei gleichzeitig einer mittleren oder langen Anpassungsdauer.
- ▶ Es besteht ein hohes Klimarisiko Ende des Jahrhunderts und einer langen Anpassungsdauer.

Dringende Handlungserfordernisse, welche die zweite Priorisierungsstufe darstellten, liegen vor, wenn

- ▶ das Klimarisiko in der Gegenwart mittel ist,
- ▶ zur Mitte des Jahrhunderts entweder ein mittleres Klimarisiko und eine mittlere oder lange Anpassungsdauer, oder ein hohes Klimarisiko und eine kurze Anpassungsdauer zu erwarten ist.
- ▶ Ende des Jahrhunderts ein mittleres Klimarisiko und eine lange Anpassungsdauer oder ein hohes Klimarisiko und eine mittlere Anpassungsdauer zu erwarten ist.

Sofern keine Reaktionsmöglichkeiten bestehen, wurden die jeweiligen Klimawirkungen nicht mit in die Gruppe der sehr dringenden Handlungserfordernisse aufgenommen, auch wenn sie ansonsten die Einstufungskategorien erfüllten.

Keine Anpassungsmöglichkeiten bestehen bei den sogenannten rein vorgelagerten Klimawirkungen auf der Ebene physischer Veränderungen von natürlichen Systemen, obwohl bei vielen ein hohes Klimarisikopotenzial gesehen wird. Die Veränderungen dieser Systeme können meist nur durch Klimaschutzbemühungen aufgehalten werden. Da dort keine Anpassungsmöglichkeiten gesehen werden, konnte ihnen auch keine Anpassungsdauer zugeordnet werden. Hierzu gehört beispielsweise der Meeresspiegelanstieg selbst. Die rein vorgelagerten Wirkungen befinden sich in den Handlungsfeldern „Boden“, „Biologische Vielfalt“, „Küsten- und Meeresschutz“ sowie „Wasserhaushalt, Wasserwirtschaft“.

Auch bei anderen Klimawirkungen, bei denen keine Möglichkeit der Anpassung gesehen wurde, kam eine Zuordnung zur Gruppe der sehr dringenden oder dringenden Handlungserfordernisse nicht in Betracht, selbst wenn die jeweiligen Klimarisiken teils als hoch (h) beziehungsweise mittel (m) eingestuft wurden. Dies gilt für „Bodenbiologie“ (m), „Bodenfunktionen: Filter- und Pufferfunktionen“ (m), „Veränderung der Länge der Vegetationsperiode und Phänologie“ (h) und für „Schäden an Gebirgsökosystemen“ (h). Hier zeigen sich ganz besonders die bestehenden Grenzen der Anpassung an den Klimawandel auch in Deutschland.

### **Ergebnisse der Priorisierung**

Die nachfolgenden Tabellen (Tabelle 25 und Tabelle 26) stellen die Zuordnung der Klimawirkungen zu den beiden Gruppen prioritärer Handlungserfordernisse dar.



**Tabelle 25: 31 Klimawirkungen mit sehr dringenden Handlungserfordernissen**

\* Die Klimawirkung ist erst in einer zweiten Bewertungsschleife der Anpassungsdauer hochgestuft worden und dadurch in den Kreis der sehr dringenden Handlungserfordernisse eingeflossen. Eine Bewertung der Anpassungskapazität erfolgte für diese Klimawirkung nicht. Kursive Schrift: lange Anpassungsdauer, fett: entsprechende Einstufung im pessimistischen und im optimistischen Fall, nicht-fett: nur im pessimistischen Fall.

| Handlungsfeld                    | Klimawirkung                                                                         | Klimarisiko Mitte d. Jh. (pess. Fall) | Klimarisiko Ende d. Jh. (pess. Fall) | Anpassungsdauer |
|----------------------------------|--------------------------------------------------------------------------------------|---------------------------------------|--------------------------------------|-----------------|
| Boden                            | Bodenerosion durch Wasser                                                            | hoch                                  | hoch                                 | mittel          |
|                                  | Wassermangel im Boden                                                                | hoch                                  | hoch                                 | mittel          |
|                                  | Bodenerosion durch Wind                                                              | hoch                                  | hoch                                 | mittel          |
|                                  | Produktionsfunktion                                                                  | hoch                                  | hoch                                 | mittel          |
| Biologische Vielfalt             | Ausbreitung invasiver Arten                                                          | hoch                                  | hoch                                 | mittel          |
|                                  | Schäden an wassergebundenen Habitaten und Feuchtgebieten                             | hoch                                  | hoch                                 | mittel          |
|                                  | <i>Schäden an Wäldern</i>                                                            | hoch                                  | hoch                                 | lang            |
| Landwirtschaft                   | Abiotischer Stress (Pflanzen)                                                        | hoch                                  | hoch                                 | mittel          |
|                                  | Ertragsausfälle                                                                      | hoch                                  | hoch                                 | mittel          |
| Wald- und Forstwirtschaft        | <i>Hitze- und Trockenstress</i>                                                      | hoch                                  | hoch                                 | lang            |
|                                  | <i>Stress durch Schädlinge / Krankheiten</i>                                         | hoch                                  | hoch                                 | lang            |
|                                  | Waldbrandrisiko                                                                      | mittel                                | hoch                                 | lang            |
|                                  | Nutzfunktion: Holzertrag                                                             | hoch                                  | hoch                                 | mittel          |
| Wasserhaushalt, Wasserwirtschaft | Gewässertemperatur und Eisbedeckung und biologische Wasserqualität                   | hoch                                  | hoch                                 | mittel          |
|                                  | Belastung oder Versagen von Hochwasserschutzsystemen                                 | hoch                                  | hoch                                 | mittel          |
|                                  | Sturzfluten (Versagen von Entwässerungseinrichtungen und Überflutungsschutzsystemen) | hoch                                  | hoch                                 | mittel          |
|                                  | Grundwasserstand und Grundwasserqualität                                             | hoch                                  | hoch                                 | mittel          |
| Küsten- und Meeresschutz         | <b><i>Wasserqualität und Grundwasserversalzung</i></b>                               | hoch                                  | hoch                                 | lang            |
|                                  | <i>Naturräumliche Veränderungen an Küsten</i>                                        | hoch                                  | hoch                                 | lang            |
|                                  | Beschädigung oder Zerstörung von Siedlung und Infrastruktur an der Küste*            | mittel                                | hoch                                 | lang            |
|                                  | Überlastung der Entwässerungseinrichtungen in überflutungsgefährdeten Gebieten       | hoch                                  | hoch                                 | mittel          |
| Fischerei                        | Verbreitung von Fischarten in Fließgewässern                                         | hoch                                  | hoch                                 | mittel          |
| Verkehr, Verkehrsinfrastruktur   | Schiffbarkeit der Binnenschiffahrtsstraßen (Niedrigwasser)                           | hoch                                  | hoch                                 | mittel          |
| Bauwesen                         | Schäden an Gebäuden aufgrund von Flusshochwasser                                     | hoch                                  | hoch                                 | mittel          |
|                                  | Vegetation in Siedlungen                                                             | mittel                                | hoch                                 | lang            |
|                                  | Stadtklima/Wärmeinseln                                                               | hoch                                  | hoch                                 | mittel          |
|                                  | Innenraumklima*                                                                      | hoch                                  | hoch                                 | mittel          |
| Industrie und Gewerbe            | Beeinträchtigung des Warenverkehrs über Wasserstraßen (Inland)                       | hoch                                  | hoch                                 | mittel          |
| Menschliche Gesundheit           | Hitzebelastung                                                                       | hoch                                  | hoch                                 | mittel          |
|                                  | Allergische Reaktionen durch Aeroallergene pflanzlicher Herkunft                     | hoch                                  | hoch                                 | mittel          |
|                                  | UV-bedingte Gesundheitsschädigungen (insb. Hautkrebs)                                | hoch                                  | hoch                                 | mittel          |

Sehr dringende Handlungserfordernisse gibt es in allen Handlungsfeldern außer der Tourismuswirtschaft und der Energiewirtschaft. Besonders häufig kommen sie bei den Handlungsfeldern „Boden“, „Wald- und Forstwirtschaft“, „Wasserhaushalt, Wasserwirtschaft“, „Küsten- und Meeresschutz“ sowie „Bauwesen“ vor. Ebenfalls noch relativ häufig sind sie in den Handlungsfeldern „Biologische Vielfalt“ und „Menschliche Gesundheit“. Für die allermeisten Klimawirkungen, bei denen sehr dringende Handlungserfordernisse vorliegen, ergeben sich diese aus der Kombina-

tion eines hohen Klimarisikos zur Mitte des Jahrhunderts bei gleichzeitiger mittlerer Anpassungsdauer. In drei Fällen ergibt sich eine Zuordnung zu sehr dringenden Handlungserfordernissen aus der langen Anpassungsdauer, trotz eines nur mittleren Klimarisikos zur Mitte des Jahrhunderts. Dies gilt für die Klimawirkungen „Vegetation in Siedlungen“, „Waldbrandrisiko“ und „Beschädigung oder Zerstörung von Siedlung und Infrastruktur an der Küste“. Für die in kursiver Schrift gedruckten Klimawirkungen besteht zudem eine nochmal besondere zeitliche Dringlichkeit, da eine Anpassungsdauer von über 50 Jahren angenommen wird und das Klimarisiko schon zu Mitte des Jahrhunderts als hoch bewertet wird. Die Klimawirkung „Wasserqualität und Grundwasserversalzung“ überschreitet auch im optimistischen Fall die Parameter zur Einstufung von „sehr dringend“, sie ist deshalb fett gedruckt.

Die Auswertung bezüglich der dringenden Handlungserfordernisse ergibt insbesondere für Klimawirkungen in den Handlungsfeldern „Biologische Vielfalt“, „Wasserhaushalt, Wasserwirtschaft“, „Verkehr, Verkehrsinfrastruktur“ sowie für das Handlungsfeld „Industrie und Gewerbe“ diese Prioritätsstufe. Darüber hinaus gibt es mehrere Klimawirkungen mit dringenden Handlungserfordernissen in den Handlungsfeldern „Wald- und Forstwirtschaft“, und „Menschliche Gesundheit“.

**Tabelle 26: 23 Klimawirkungen mit dringenden Handlungserfordernissen**

Fett: entsprechende Einstufung im optimistischen und im pessimistischen Falle, nicht fett: nur im pessimistischen Fall.

| Handlungsfeld                    | Klimawirkung                                                                                | Klimarisiko Mitte d. Jh. (pess. Fall) | Klimarisiko Ende d. Jh. (pess. Fall) | Anpassungsdauer |
|----------------------------------|---------------------------------------------------------------------------------------------|---------------------------------------|--------------------------------------|-----------------|
| Boden                            | Rutschungen und Muren                                                                       | mittel                                | mittel                               | mittel          |
| Biologische Vielfalt             | <b>Schäden an Küstenökosystemen</b>                                                         | mittel                                | hoch                                 | mittel          |
|                                  | Ökosystemleistungen                                                                         | mittel                                | hoch                                 | mittel          |
|                                  | <b>Verschiebung von Arealen und Rückgang der Bestände</b>                                   | mittel                                | hoch                                 | mittel          |
|                                  | Verlust an genetischer Vielfalt                                                             | mittel                                | hoch                                 | mittel          |
| Wald- und Forstwirtschaft        | <b>Schäden durch Windwurf</b>                                                               | mittel                                | mittel                               | mittel/lang     |
|                                  | Nutzfunktion: Erholung                                                                      | mittel                                | mittel                               | mittel/lang     |
| Wasserhaushalt, Wasserwirtschaft | Mangel an Bewässerungswasser                                                                | mittel                                | hoch                                 | mittel          |
|                                  | <b>Chemische Wasserqualität</b>                                                             | mittel                                | mittel                               | kurz            |
|                                  | Einschränkungen der Funktionsfähigkeit von Kanalnetzen und Vorflutern und Kläranlagen       | mittel                                | mittel                               | mittel          |
| Fischerei                        | <b>Entkopplung von Nahrungsbeziehungen in der Ostsee</b>                                    | hoch                                  | hoch                                 | kurz            |
| Küsten- und Meeresschutz         | <b>Höhere Belastung oder Versagen von Küstenschutzsystemen</b>                              | mittel                                | mittel                               | mittel/lang     |
| Verkehr, Verkehrsinfrastruktur   | Schäden/Hindernisse bei Straßen und Schienenwegen (Hochwasser)                              | mittel                                | mittel                               | mittel          |
|                                  | Schäden/Hindernisse bei Straßen und Schienenwegen (gravitative Massenbewegungen)            | mittel                                | mittel                               | mittel          |
|                                  | Schäden an Verkehrsleitsystemen, Oberleitungen und Stromversorgungsanlagen                  | mittel                                | mittel                               | mittel          |
| Bauwesen                         | <b>Schäden an Gebäuden aufgrund von Starkregen</b>                                          | mittel                                | mittel                               | mittel          |
| Tourismuswirtschaft              | <b>Wirtschaftliche Chancen und Risiken für die Tourismuswirtschaft</b>                      | mittel                                | hoch                                 | kurz            |
| Industrie und Gewerbe            | <b>Beeinträchtigung der Versorgung mit Rohstoffen und Zwischenprodukten (international)</b> | hoch                                  | hoch                                 | kurz            |
|                                  | Beeinträchtigung des internationalen Warentransports                                        | mittel                                | mittel                               | mittel          |
|                                  | <b>Wasserbedarf</b>                                                                         | mittel                                | mittel                               | kurz            |
|                                  | <b>Leistungseinbußen von Beschäftigten</b>                                                  | mittel                                | hoch                                 | kurz            |
| Menschliche Gesundheit           | <b>Atembeschwerden (aufgrund von Luftverunreinigungen)</b>                                  | mittel                                | hoch                                 | kurz            |
|                                  | <b>Auswirkungen auf das Gesundheitssystem</b>                                               | mittel                                | hoch                                 | kurz            |

Wie oben erwähnt, dienen als Grundlage der Priorisierung die Bewertungen im pessimistischen Fall des Klimawandels. Für die Klimawirkung „Wasserqualität und Grundwasserversalzung“ lassen sich jedoch auch im optimistischen Fall sehr dringende Handlungserfordernisse ableiten. Bei fast allen weiteren Klimawirkungen aus Tabelle 26 gilt, dass im optimistischen Fall keine sehr dringenden, sondern nur dringende Handlungserfordernisse vorliegen. Einzig für die Klimawirkung „Grundwasserstand und Grundwasserqualität“ bestehen im optimistischen Fall auch keine dringenden Handlungserfordernisse mehr. Für alle Klimawirkungen, die in Tabelle 26 durch fette Schrift hervorgehoben sind, lassen sich bereits im optimistischen Fall dringende Handlungserfordernisse ableiten.

## 6.2 Charakterisierung der Handlungserfordernisse

### Charakterisierung aufgrund des Anpassungspotenzials

Auf der Basis der Analyse der Anpassungskapazitäten (siehe Kapitel 5) lassen sich zu den identifizierten Klimawirkungen mit sehr dringenden Handlungserfordernissen ergänzende Aussagen treffen. Diese betreffen zunächst einmal folgende Fragestellungen:

- ▶ Reichen die beschlossenen Maßnahmen im optimistischen und im pessimistischen Fall aus, um das Restrisiko auf ein bestimmtes, gesetztes Niveau zu reduzieren?
- ▶ Reichen die weiterreichenden Maßnahmen im optimistischen und im pessimistischen Fall aus, um das Restrisiko auf ein bestimmtes, gesetztes Niveau zu reduzieren?
- ▶ Wie sicher sind die getroffenen Aussagen?

Anhand dieser Fragen können die Klimawirkungen mit sehr dringenden Handlungserfordernissen in fünf Gruppen unterteilt werden:

- I. **Umsetzung:** In dieser Kategorie reichen die beschlossenen Maßnahmen aus, um das Klimarisiko durch Anpassung auf ein zuvor festgesetztes Restrisiko zu reduzieren. Bei Klimawirkungen in dieser Gruppe geht es insbesondere darum, die Umsetzung der bestehenden Planungen sicherzustellen. Dies kann etwa darauf hinzielen, die Finanzierung der Maßnahmen zu gewährleisten, ein laufendes Monitoring durchzuführen oder zu klären, dass Akteure jenseits der Ebene des Bundes in ausreichendem Maße in die Implementierung der Maßnahmen eingebunden sind.
- II. **Entwicklung:** Bei dieser Kategorie reichen die beschlossenen Maßnahmen zum Erreichen des anvisierten Restrisikos nicht aus, sodass darüber hinaus gehende, weiterreichende Maßnahmen in Betracht gezogen werden müssen. Neben der Umsetzung der beschlossenen Maßnahmen geht es also vor allem um die Entwicklung und Implementierung neuer Maßnahmen. Die weiterreichenden Maßnahmen sollten bei der Anpassungsplanung berücksichtigt werden, auch wenn sie gegebenenfalls mit (deutlichen) zusätzlichen Kosten verknüpft sind und nur im Falle des Klimawandels Vorteile erbringen (high-regret).
- III. **Entwicklung unter Unsicherheit:** Bei dieser Gruppe von Klimawirkungen mit sehr dringenden Handlungserfordernissen ist die Gewissheit bei der Bewertung des Restrisikos gering, sodass sich weitere Forschung zur Entwicklung und vor beziehungsweise zum Aufgreifen weiterreichender Maßnahmen empfiehlt. Gleichzeitig ist es erforderlich, die Umsetzung der beschlossenen Maßnahmen sicherzustellen.
- IV. **Innovation:** Bei Klimawirkungen mit sehr dringenden Handlungserfordernissen aus dieser Gruppe ist es relativ sicher, dass das Ziel der Anpassung, das Restrisiko auf ein be-

stimmtes vorgegebenes Maß zu verringern, selbst bei der Umsetzung aller beschlossenen und weiterreichenden Maßnahmen nicht erreicht wird. Soweit möglich ist hier tiefgreifende Anpassung in Betracht zu ziehen. Hierzu gilt es, Forschung zu entsprechenden Anpassungsansätzen voranzutreiben sowie einen fachlichen und gegebenenfalls gesellschaftlichen Diskurs zur Notwendigkeit solcher tiefgreifenden Anpassungsmaßnahmen und dafür notwendige Veränderungen in den Rahmenbedingungen zu starten.

- V. **Innovation unter Unsicherheit:** Für Klimawirkungen mit sehr dringenden Handlungserfordernissen, die dieser Kategorie zuzuordnen sind, ist das vorhandene Wissen noch gering. Dennoch scheint es so, dass das Ziel der Anpassung nicht erreicht werden kann. Weitere intensive Forschung sowohl mit Blick auf mögliche weiterreichende Anpassungsmaßnahmen als auch mit Blick auf tiefgreifende Anpassung erscheint sinnvoll. Darüber hinaus empfiehlt sich die Umsetzung beschlossener Maßnahmen und die Einbeziehung weiterreichender Maßnahmen in die Anpassungsplanung.

Welche Klimawirkung auf Basis der Betrachtung der Anpassungskapazität welcher Gruppe von Handlungserfordernissen zugeordnet wird, hängt davon ab, welches Restrisiko im optimistischen oder im pessimistischen Fall akzeptiert werden soll und welche Gewissheit bei der Bewertung ausreichend für eine weitere Anpassungsplanung erscheint. Für die Betrachtung der Gewissheit wurde eine Gesamtgewissheit der Bewertungen abgeleitet, die sich aus der Kombination der Gewissheit der Bewertung des Klimarisikos ohne Anpassung sowie der Gewissheit der Bewertung der Anpassungskapazität ergibt. Den Skalenwerten der Einordnung der Gewissheit (*sehr gering, gering, mittel, hoch*) wurden die Werte 0, 1, 2 und 3 zugeordnet. Erst ab einem Mittelwert von über 1,5 wurde die Gesamtgewissheit hier als „mittel“ eingestuft.<sup>28</sup>

Die im Folgenden beispielhaft dargestellten Ergebnisse beruhen auf der (normativen) Vorgabe, dass

- ▶ im optimistischen Fall ein gering-mittleres Restrisiko nicht überschritten werden soll und
- ▶ im pessimistischen Fall ein mittleres Restrisiko durch die Umsetzung von Anpassungsmaßnahmen angestrebt wird sowie
- ▶ eine mittlere Gesamtgewissheit ausreicht, um nicht zu einer der beiden Gruppen „unter Unsicherheit“ zu zählen.

---

<sup>28</sup> Ausnahmen in der Berechnung erfolgten bei Klimawirkungen, bei denen die beschlossenen Maßnahmen (APA III) ausschlaggebend für die Zuordnung waren. Für die Details der Bewertungen der Gewissheit und der Gesamtgewissheit siehe Teilbericht 1, „Konzept und Methodik“.

Die unter diesen Vorgaben resultierende Zuordnung wird beispielhaft in Tabelle 27 dargestellt.

**Tabelle 27: Kategorien von sehr dringenden Handlungserfordernissen**

| Gruppe der Handlungserfordernisse | Handlungsfeld                                                                        | Klimawirkung                                                                   |
|-----------------------------------|--------------------------------------------------------------------------------------|--------------------------------------------------------------------------------|
| Umsetzung                         | Wasserhaushalt, Wasserwirtschaft                                                     | Belastung oder Versagen von Hochwasserschutzsystemen                           |
|                                   | Verkehr, Verkehrsinfrastruktur                                                       | Schiffbarkeit der Binnenschiffahrtsstraßen (Niedrigwasser)                     |
|                                   | Menschliche Gesundheit                                                               | Allergische Reaktionen durch Aeroallergene pflanzlicher Herkunft (z.B. Pollen) |
| Entwicklung                       | Landwirtschaft                                                                       | Abiotischer Stress (Pflanzen)                                                  |
|                                   |                                                                                      | Wasserqualität und Grundwasserversalzung                                       |
|                                   | Küsten- und Meeresschutz                                                             | Naturräumliche Veränderungen an Küsten                                         |
|                                   |                                                                                      | Überlastung der Entwässerungseinrichtungen in überflutungsgefährdeten Gebieten |
|                                   | Wasserhaushalt, Wasserwirtschaft                                                     | Gewässertemperatur und Eisbedeckung und biologische Wasserqualität             |
|                                   | Bauwesen                                                                             | Schäden an Gebäuden aufgrund von Flusshochwasser                               |
|                                   |                                                                                      | Stadtklima/Wärmeinseln                                                         |
| Industrie und Gewerbe             | Beeinträchtigung des Warenverkehrs über Wasserstraßen (Inland)                       |                                                                                |
| Menschliche Gesundheit            | Hitzebelastung                                                                       |                                                                                |
|                                   | UV-bedingte Gesundheitsschädigungen (insb. Hautkrebs)                                |                                                                                |
| Entwicklung mit Unsicherheit      | Landwirtschaft                                                                       | Ertragsausfälle                                                                |
|                                   | Biologische Vielfalt                                                                 | Schäden an wassergebundenen Habitaten und Feuchtgebieten                       |
|                                   | Boden                                                                                | Wassermangel im Boden                                                          |
| Bodenerosion durch Wind           |                                                                                      |                                                                                |
| Innovation                        | Biologische Vielfalt                                                                 | Ausbreitung invasiver Arten                                                    |
|                                   | Fischerei                                                                            | Verbreitung von Fischarten in Fließgewässern                                   |
|                                   | Bauwesen                                                                             | Vegetation in Siedlungen                                                       |
| Innovation unter Unsicherheit     | Wald- und Forstwirtschaft                                                            | Hitze- und Trockenstress                                                       |
|                                   |                                                                                      | Stress durch Schädlinge / Krankheiten                                          |
|                                   |                                                                                      | Nutzfunktion: Holztertrag                                                      |
|                                   | Biologische Vielfalt                                                                 | Waldbrandrisiko                                                                |
|                                   |                                                                                      | Schäden an Wäldern                                                             |
|                                   | Boden                                                                                | Bodenerosion durch Wasser                                                      |
| Produktionsfunktion               |                                                                                      |                                                                                |
| Wasserhaushalt, Wasserwirtschaft  | Grundwasserstand und Grundwasserqualität                                             |                                                                                |
|                                   | Sturzfluten (Versagen von Entwässerungseinrichtungen und Überflutungsschutzsystemen) |                                                                                |

Unter den erwähnten Vorgaben sind der Kategorie „Umsetzung“ vier Klimawirkungen aus unterschiedlichen Handlungsfeldern zugeordnet, insgesamt als nur ein kleiner Anteil aller Klimawirkungen mit sehr dringenden Handlungserfordernissen.

Die meisten der Klimawirkungen mit sehr dringenden Handlungserfordernissen können der Gruppe „Entwicklung“ zugeordnet werden, das heißt hier werden bei der weiterreichenden Anpassung ausreichend hohe Potenziale gesehen, um die Restrisiken entsprechend der normativen Setzung reduzieren zu können. Mehrere Klimawirkungen wurden in den Handlungsfeldern „Küsten- und Meeresschutz“, „Bauwesen“ und „Menschliche Gesundheit“ dieser Kategorie zugeordnet.

Die Kategorie „Entwicklung“ wird ergänzt durch die Kategorie „Entwicklung unter Unsicherheit“, wo ebenfalls hohe Anpassungspotenziale im Bereich der weiterreichenden Anpassung gesehen werden, aber aufgrund der geringen Gewissheit zunächst mittels Forschung die Wissensgrundlagen gestärkt werden sollten. Dies betrifft bei der oben geschilderten normativen Setzung unter anderem zwei Klimawirkungen des Handlungsfelds „Boden“.



In der Kategorie „Innovation“ reichen die Anpassungspotenziale der beschlossenen Maßnahmen (APA III) und der weiterreichenden Anpassung nicht aus, die anvisierten Restrisiken zu erreichen, so dass darüber hinausgehende tiefgreifende Anpassung notwendig sein wird. Dies betrifft im Beispiel drei Klimawirkungen.

In der ergänzenden Kategorie „Innovation unter Unsicherheit“ finden sich relativ viele Klimawirkungen, was schlicht die Tatsache widerspiegelt, dass die Gesamtgewissheit in knapp der Hälfte der Fälle gering ist. Dies deutet auf einen ausgeprägten Bedarf nach zusätzlicher Forschung besonders in den Handlungsfeldern „Wald- und Forstwirtschaft“, „Boden“ sowie „Wasserhaushalt, Wasserwirtschaft“ hin, um die Möglichkeit zu wahren, das Restrisiko der verschiedenen Klimawirkungen auf das hier gewünschte Niveau zu reduzieren.

Betrachtet man die beiden Kategorien „Entwicklung unter Unsicherheit“ und „Innovation unter Unsicherheit“ gemeinsam, wird deutlich, dass besonders in den Handlungsfeldern „Boden“ sowie „Wald- und Forstwirtschaft“ viele Klimawirkungen mit relativ geringer Gewissheit und daher hohem Forschungsbedarf trotz hohen Klimarisiken und sehr dringenden Handlungserfordernissen zu finden sind.

Die in Tabelle 27 präsentierte Zuordnung der Klimawirkungen reagiert in hohem Maße sensitiv auf Änderungen des akzeptierten Restrisikos sowie auf die Festlegung der gewünschten Gewissheit. Wird einer dieser Parameter geändert, verschieben sich die Gruppenzuordnungen erheblich. Der Festlegung der Zielwerte kommt damit eine hohe Bedeutung zu. Im Rahmen einer Sensitivitätsanalyse konnten allerdings einige Klimawirkungen identifiziert werden, deren Zuordnung auch bei Änderung der Zielvorstellungen für die Parameter relativ robust ist.

Für vier Klimawirkungen gilt, dass sie so stark von Unsicherheit geprägt sind, dass sie auch bei einer relativ geringen Gewissheitsschwelle, das heißt bei einem Mittelwert von über eins, nicht ohne weitere Forschung auskommen. Dies betrifft im Handlungsfeld „Boden“ „Wassermangel im Boden“ und „Produktionsfunktionen“, außerdem im Handlungsfeld „Wasserhaushalt, Wasserwirtschaft“ „Sturzfluten (Versagen von Entwässerungseinrichtungen und Überflutungsschutzsystemen)“ sowie „Grundwasserstand und Grundwasserqualität“.<sup>29</sup> Für diese Klimawirkungen ist daher das vorrangige Handlungserfordernis, weitere Forschung durchzuführen. Werden die Gesamtwerte der Gewissheiten jedoch erst bei einer relativen hohen Gewissheit, das heißt ab mehr als 1,5, als ausreichend eingestuft, um ohne weitere Forschung auszukommen, kommen, wie oben dargestellt, neun Klimawirkungen hinzu. Es zeigt sich also, dass die Festlegung des akzeptierten Wertes für die Gewissheit einen signifikanten Einfluss auf die Zuordnung der Klimawirkungen in die Gruppen von Handlungserfordernissen hat.

Auch die Veränderung des normativen Zielwertes für das Restrisiko beeinflusst das Ergebnis der Zuordnung erheblich und damit die Aussage, ob die beschlossenen allein oder mit weiterreichenden Maßnahmen zusammen als ausreichend für die Erreichung des normativ gesetzten Zielwertes sind oder nicht. Wird beispielsweise der Zielwert auch für den pessimistischen Fall von mittel auf gering-mittel reduziert, wie beim optimistischen Fall, sind die beschlossenen Maßnahmen nur noch für eine Klimawirkung („Belastung oder Versagen von Hochwasserschutzsystemen“) ausreichend, um dieses Restrisiko zu erreichen. Gleichzeitig wird dieser Zielwert nur bei fünf von 30 untersuchten Klimawirkungen durch weiterreichende Anpassung erreicht. Bei der Annahme eines geringen Restrisikos als Zielwert, sowohl im optimistischen als

---

<sup>29</sup> Die Klimawirkungen „Allergische Reaktionen durch Aeroallergene pflanzlicher Herkunft (z. B. Pollen)“ im Handlungsfeld „Menschliche Gesundheit“ und „Belastung oder Versagen von Hochwasserschutzsystemen“ im Handlungsfeld „Wasserhaushalt, Wasserwirtschaft“ stellen Ausnahmefälle dar, weil hier die Bewertung auf der Basis der beschlossenen Maßnahmen erfolgt (siehe auch Fußnote 28)).

auch im pessimistischen Fall, reichen bis auf eine Klimawirkung die beschlossenen und weiterreichenden Maßnahmen nicht aus, um diesen Zielwert zu erlangen, das heißt nur für die Klimawirkung „Schiffbarkeit der Binnenschiffahrtsstraßen (Niedrigwasser)“ kann durch Umsetzung beschlossener Maßnahmen und die Entwicklung von weiterreichenden Maßnahmen das Restrisiko entsprechend gesenkt werden.

Insgesamt zeigt die beispielhafte Setzung eines akzeptierten Restrisikos im pessimistischen Fall von „mittel“ auf, dass auch bei einer gewissen Risikobereitschaft bei relativ vielen sehr dringlichen Handlungserfordernissen weiterreichende Anpassung erforderlich sein wird. Dieses Bild ändert sich nur, wenn man für die Festlegung von Handlungserfordernissen den pessimistischen Fall weitgehend ausblendet.

### **Charakterisierung aufgrund der Anpassungsdimensionen**

Im Rahmen der Bewertung der Anpassungskapazität wurde durch eine Einordnung von 1 (gering) bis 5 (hoch) eingeschätzt, in welchem Ausmaß Maßnahmen in den sechs Anpassungsdimensionen (Wissen, Motivation und Akzeptanz, Technologie und natürliche Ressourcen, Finanzielle Ressourcen, Institutionelle Strukturen und personelle Ressourcen, Rechtliche Rahmenbedingungen und politische Strategien) in Zukunft wirksam das Klimarisiko reduzieren können. Dabei wurde sowohl nach einer Einschätzung bezüglich der beschlossenen Maßnahmen (APA III) als auch der weiterreichenden Anpassungsmaßnahmen gefragt, das heißt, die Einschätzung erfolgte jeweils für ein großes und heterogenes Maßnahmenbündel (siehe auch Teilbericht 1, „Konzept und Methodik“).

Soweit es zu unterschiedlichen Einschätzungen durch die Netzwerkpartner kam, wurden die Netzwerkpartner gebeten, ihre Bewertung zu überdenken. Danach wurden die Bandbreiten der Einschätzungen ausgewiesen. Die Einschätzungen waren sehr komplex und fehleranfällig für Missverständnisse und Fehlinterpretationen, da sie einen hohen Abstraktionsgrad erforderten. Daher sind diese Bewertungen mit hohen Unsicherheiten verbunden und die darauf basierenden Aussagen können nur als Tendenzen angesehen werden.

Aus den Einschätzungen lässt sich zum einen erkennen, welche Anpassungsdimensionen durch die beschlossenen Anpassungsmaßnahmen bereits schwerpunktmäßig adressiert werden, das heißt, ob die Maßnahmen unter realistischen Umsetzungserwartungen eine positive Veränderung in einer Dimension erreichen und diese Veränderung auch zu einer Reduktion des Klimarisikos führt. Zum anderen kann aus der Bewertung der Dimensionen der weiterreichenden Anpassung abgelesen werden, in welchen Dimensionen insbesondere Potenziale für weitere Maßnahmen bestehen, die zu einer wirksamen Reduktion des Klimarisikos führen. Dabei ist allerdings zu berücksichtigen, dass die Dimensionen miteinander verknüpft sind und zum Beispiel eine ausreichende Finanzierung in den anderen Dimensionen oft vorausgesetzt beziehungsweise mitgedacht wurde.

Die Auswertung der Einschätzungen der Anpassungsdimensionen für alle Klimawirkungen mit sehr dringenden Handlungserfordernissen zeigt, dass bei den beschlossenen Maßnahmen alle Dimensionen bereits durch Maßnahmen angesprochen werden. Der Mittelwert über alle betrachteten Klimawirkungen und alle Dimensionen beträgt 2,3. Der höchste Mittelwert (2,8) wird in der Dimension „Wissen“ erreicht. Mit dem Wert 2,5 folgt die Dimension „Technologie und natürliche Ressourcen“, „Rechtliche Rahmenbedingungen und politische Strategien“ folgt mit dem Wert 2,4 und „Finanzielle Ressourcen“ mit dem Wert 2,3. Die Dimensionen „Motivation und Akzeptanz“ (2,1) sowie „Institutionelle Strukturen und personelle Ressourcen“ (2,1) haben die niedrigsten Werte.

Die Einschätzung der Wirksamkeit der weiterreichenden Anpassung in den einzelnen Dimensionen weicht erkennbar davon ab. Betrachtet man den Mittelwert aller Klimawirkungen mit sehr dringenden Handlungserfordernissen über alle Dimensionen hinweg, so liegt er bei 2,7. Die zwei Dimensionen mit den höchsten Mittelwerten sind „Technologie und natürliche Ressourcen“ (3,4) sowie „Rechtliche Rahmenbedingungen und politische Strategien“ (3,1), gefolgt von „Motivation und Akzeptanz“ (2,7), „Finanzielle Ressourcen“ (2,6) sowie „Institutionelle Strukturen und personelle Ressourcen“ (2,5). An letzter Stelle steht die Anpassungsdimension „Wissen“ (2,2).

Betrachtet man die Dimensionen getrennt nach den fünf Systembereichen, so ist festzustellen, dass natürliche Systeme und Ressourcen bei den rechtlichen Rahmenbedingungen und politischen Strategien, der Mobilisierung von Technologien und natürlichen Ressourcen sowie bei Motivation und Akzeptanz hohe weitere Anpassungspotenziale haben können. Bei naturnutzen- den Wirtschaftssystemen werden insbesondere im Bereich Technologien und natürlichen Ressourcen weitere Anpassungspotenziale gesehen. Gleiches gilt für den Bereich Infrastrukturen, wo zusätzlich auch bei den Dimensionen „Rechtliche Rahmenbedingungen und politische Strategien“ sowie „Finanzielle Ressourcen“ noch relativ hohe Anpassungspotenziale erwartet werden. Zu den anderen Systembereichen (naturferne Wirtschaftssysteme sowie Menschen und soziale Systeme) lassen sich aufgrund der niedrigen Fallzahlen (weniger als fünf bewertete Klimawirkungen) keine sinnvollen Aussagen treffen.

## 7 Querbetrachtung der Systembereiche

Autoren: Walter Kahlenborn | adelphi, Berlin  
Inke Schauser | Umweltbundesamt, Dessau-Roßlau

Wie in Kapitel 2.1 ausgeführt, können die einzelnen Klimawirkungen verschiedenen Gruppen zugeordnet werden. Grundsätzlich lassen sich fünf übergeordnete Systembereiche relativ gut unterscheiden, die unterschiedlich stark dem Klimawandel ausgesetzt sind und unterschiedlich gut auf ihn reagieren können.

### Natürliche Systeme und Ressourcen

„Natürliche Systeme und Ressourcen“, wie Grundwasser, Böden oder Ökosysteme sind sehr direkt vom Klimawandel betroffen. Klimawirkungen, die hier zugeordnet werden können, finden sich vor allem in den Handlungsfeldern „Boden“, „Biologische Vielfalt“, „Wasserhaushalt, Wasserwirtschaft“ sowie „Küsten- und Meeresschutz“.

Bei den 30 hier untersuchten Klimawirkungen lassen sich an vielen Stellen bereits heute deutlich sichtbare Auswirkungen des Klimawandels beobachten, zum Beispiel bei den Fischbeständen in der Nord- und Ostsee, den Wäldern in den trockenen Regionen Ostdeutschlands und den Mittelgebirgen (Fichtensterben, Absterben alter Buchen, Waldbrände) oder den Grundwasserspeichern der karstigen Regionen im Süden Deutschlands.

Bei sehr vielen natürlichen Systemen – 60 Prozent der untersuchten Klimawirkungen – werden bereits zur Mitte des Jahrhunderts hohe Klimarisiken erwartet und die Zahl steigt bis zum Ende des Jahrhunderts auf 70 Prozent. Insbesondere der graduelle Temperaturanstieg, aber auch Extreme wie Hitze und Trockenheit sowie potentiell auch Starkwind bedrohen die natürlichen Systeme.

Der graduelle Temperaturanstieg wirkt sich besonders deutlich auf biologische Systeme aus, die direkt von der Temperatur gesteuert werden. Dies betrifft vor allem Systeme im Handlungsfeld „Biologische Vielfalt“ und führt beispielsweise zum Artenwandel. Die stetige Temperaturzunahme ist aber auch Ursache für den Meeresspiegelanstieg im Handlungsfeld „Küsten- und Meeresschutz“ und beeinflusst damit dort unter anderem „Naturräumliche Veränderungen an Küsten“. Trockenheit wirkt sich vor allem auf die Handlungsfelder „Boden“ und „Wasserhaushalt, Wasserwirtschaft“ aus, weil dadurch sowohl die Wassermenge im Boden, Grundwasser und in Oberflächengewässern als auch die Wasserqualität von Gewässern beeinflusst wird. Zudem beeinträchtigt Trockenheit Wälder und wassergebundene Habitate. Starkwindereignisse haben eine besondere Bedeutung für Waldregionen und für Küsten, wo sie zu Sturmfluten führen können, deren Scheitelwasserstände durch den Meeresspiegelanstieg noch erhöht werden.

Die Systeme selbst haben zumeist ein relativ geringes eigenes Anpassungspotential gegenüber den Folgen des Klimawandels, da dieser sich in vielerlei Hinsicht zu schnell für eine autonome Anpassung vollzieht. Die Anpassungsmöglichkeiten sind tendenziell eher geringer als bei den anderen (nachfolgend diskutierten) Systemen. So wird die durchschnittliche Wirksamkeit von weiterreichender Anpassung als deutlich niedriger eingeschätzt als bei anderen Systembereichen. Vielfach müssen Anpassungsmaßnahmen darauf abzielen, die eigenen Fähigkeiten der Systeme zur Anpassung zu stärken. Dies bedeutet, sie vom bestehenden Nutzungsdruck (Zerschneidung von Lebensräumen, Verschmutzung oder Übernutzung von Ressourcen) zu entlasten. Die beschlossenen Anpassungsmaßnahmen sind bei diesen Systemen weniger wirksam als bei den Klimawirkungen anderer Systeme. Weiterreichende, aber auch tiefergehende Anpassung ist daher stärker gefordert.

Die Anpassungsdauer ist bei diesen Systemen zumeist relativ lange, das heißt meist über zehn und teils über 50 Jahre, und im Durchschnitt deutlich länger als bei den anderen Systembereichen. Dies wiederum führt bei einigen Klimawirkungen („Schäden an Wäldern“, „Wasserqualität und Grundwasserversalzung“, „Naturräumliche Veränderungen an Küsten“) dazu, dass schon jetzt kaum noch die Zeit besteht, um bei einem starken Klimawandel die Klimarisiken noch rechtzeitig umfassend einzudämmen.

Bei vier untersuchten Klimawirkungen aus diesem Bereich werden auch die Grenzen der Anpassung absehbar überschritten, weil Anpassungsmaßnahmen grundsätzlich nicht zur Verfügung stehen („Veränderung der Länge der Vegetationsperiode und Phänologie“, „Schäden an Gebirgsökosystemen sowie „Bodenbiologie“ und „Bodenfunktionen: Filter- und Pufferfunktionen“). Bei fünf anderen Klimawirkungen wird trotz weiterreichender Anpassung bereits zur Mitte des Jahrhunderts mit mittel-hohen oder hohen Klimarisiken im pessimistischen Fall gerechnet („Bodenerosion durch Wasser“, „Ausbreitung invasiver Arten“, „Schäden an Wäldern“, „Sturzfluten (Versagen von Entwässerungseinrichtungen und Überflutungsschutzsystemen)“, „Grundwasserstand und Grundwasserqualität“). Der Bedarf nach mehr und tiefgreifender Anpassung ist groß, insbesondere für den Erhalt der Biologischen Vielfalt sowie im Bereich des Wasser- und Bodenschutzes. Die Gewissheit bei den Bewertungen des Klimarisikos ohne Anpassung wie auch bei der Bewertung der Anpassungskapazität ist jeweils tendenziell geringer als in den anderen Bereichen.

Ein besonderes Kennzeichen des Bereichs „Natürliche Systeme und Ressourcen“ ist, dass von hier aus besonders viele Klimawirkungen ausgehen und auf andere Bereiche einwirken. Da alle neun untersuchten rein vorgelagerten Klimawirkungen wie zum Beispiel „Niedrigwasser“, „Hochwasser“ oder „Meeresspiegelhöhe“ diesem Bereich zugeordnet sind, wird die Aussage zunächst nicht überraschen. Sie gilt aber auch unter Vernachlässigung der rein vorgelagerten Klimawirkungen. Selbst dann gehen etwa 50 Prozent der knapp 160 identifizierten ausgehenden Wirkbeziehungen von hier aus. Eine besonders enge Verknüpfung besteht mit den „Naturnutzenden Wirtschaftssystemen“, zu denen 50 Wirkbeziehungen hinführen. Ein gutes Beispiel dafür ist die Klimawirkung „Verschiebung von Arealen und Rückgang der Bestände“, die eine recht zentrale Position mit vielen ausgehenden Wirkbeziehungen einnimmt (siehe 3.4). Andere Beispiele sind die Klimawirkungen „Wassermangel im Boden“ und „Veränderung der Länge der Vegetationsperiode und Phänologie“.

Aus der Kombination von langer Anpassungsdauer und hohen Klimarisiken ergeben sich speziell für die natürlichen Systeme und Ressourcen relativ und absolut gesehen sehr viele (11) sehr dringende Handlungserfordernisse. Hinzu kommen fünf dringende Handlungserfordernisse. Zieht man noch die (13) Klimawirkungen ab, bei denen keine Anpassungsmöglichkeiten bestehen, weil Grenzen erreicht werden (4) oder die Klimawirkungen vorgelagert sind (9), das heißt ihr Klimarisiko nur durch Klimaschutzmaßnahmen vermindert werden könnte, wird ersichtlich, dass bei fast allen Klimawirkungen, bei denen Anpassung möglich wäre, auch Handlungserfordernisse bestehen.

### **Naturnutzende Wirtschaftssysteme**

„Naturnutzende Wirtschaftssysteme“ sind der größte übergeordnete Bereich mit 31 Klimawirkungen. Die meisten Klimawirkungen dieser Gruppe stammen aus den Handlungsfeldern „Landwirtschaft“, „Wald- und Forstwirtschaft“ und „Fischerei“, es kommen aber noch diverse aus verschiedenen weiteren Handlungsfeldern hinzu.

Die Klimarisiken ohne Anpassung sind in diesem Bereich erkennbar geringer als bei den natürlichen Systemen und Ressourcen und zwar über alle Zeitscheiben hinweg und sowohl für den op-



timistischen wie auch den pessimistischen Fall. Gleichwohl sind die Klimarisiken keineswegs gering. Neun Klimawirkungen, das heißt knapp ein Drittel, können zur Mitte des Jahrhunderts im pessimistischen Fall ein hohes Klimarisiko aufweisen und die Zahl kann bis zum Ende des Jahrhunderts auf 16, also gut die Hälfte aller Klimawirkungen in diesem Bereich ansteigen.

Für die Klimawirkungen aus der Landwirtschaft, der Wald- und Forstwirtschaft und der Wasserwirtschaft ist Trockenheit dabei ein wichtiger Faktor. Viele dieser Systeme wurden in den letzten Jahren von der Trockenheit geschädigt. Dies gilt etwa für Fichtenforste in den Mittelgebirgen, aber auch für die landwirtschaftliche Produktion in Ostdeutschland. Teils wirkt sich hier die Kombination von Hitze und Trockenheit zusätzlich aus (zum Beispiel „Abiotischer Stress (Pflanzen)“ im Handlungsfeld „Landwirtschaft“ und „Hitze- und Trockenstress“ im Handlungsfeld „Wald- und Forstwirtschaft“). Trockenheit spielt aber auch für die Vegetation in Städten oder für die Schiffbarkeit von Binnenschiffahrtsstraßen eine Rolle.

Auch der graduelle Temperaturanstieg hat einen großen Einfluss auf sehr viele Klimawirkungen in diesem Systembereich. Dies wird etwa bei verschiedenen Klimawirkungen aus dem Handlungsfeld „Fischerei“ evident („Verbreitung von Fischarten in Fließgewässern“, „Stress durch Schädlinge/Krankheiten“ sowie bei „Schäden an Aquakulturen“). Es betrifft zudem die vorgenannten Handlungsfelder „Landwirtschaft“ und „Wald- und Forstwirtschaft“.

Anpassungsmaßnahmen sind in diesem Systembereich bereits vielfach initiiert. Die beschlossenen Anpassungsmaßnahmen werden voraussichtlich deutlich wirksamer sein als bei den „Natürlichen Systemen und Ressourcen“. Auch die Potentiale bei den weiterreichenden Anpassungsmaßnahmen sind grundsätzlich höher, aber in der Gesamtbetrachtung aller Systembereiche nicht überdurchschnittlich. Relativ hohe Anpassungspotentiale werden in der Landwirtschaft gesehen, geringe Anpassungspotentiale in der Wald- und Forstwirtschaft sowie in der Fischerei. Auffallend ist die erhebliche Diskrepanz zwischen der Wirksamkeit von Maßnahmen im optimistischen und im pessimistischen Fall. Die Wirksamkeit von Anpassungsmaßnahmen sinkt bei einem starken Klimawandel erheblich, vermutlich weil Trockenheit in diesem Systembereich eine große Rolle spielt und die Anpassungsvoraussetzungen sich gerade mit Blick auf Trockenheit zwischen den beiden Fällen stark unterscheiden können.

Insgesamt sieht die Situation mit Blick auf Klimarisiken mit Anpassung für diesen Systembereich aufgrund der etwas besseren Wirksamkeit von Anpassungsmaßnahmen und der im Durchschnitt geringeren Klimarisiken ohne Anpassung spürbar besser aus als im Fall der „Natürlichen Systeme und Ressourcen“. Im Unterschied zu den „Natürlichen Systemen und Ressourcen“ wurde in dem Systembereich auch keine Klimawirkung identifiziert, für die es keine Reaktionsmöglichkeiten gibt. Trotzdem ist es so, dass für sechs von 11 insgesamt bewerteten Klimawirkungen das Klimarisiko mit Anpassung Mitte des Jahrhunderts im pessimistischen Fall auf mittel-hoch eingeschätzt wurde: „Produktionsfunktionen“ (Handlungsfeld „Boden“), „Hitze und Trockenstress“, „Nutzfunktion: Holzertrag“ und „Stress durch Schädlinge/Krankheiten“ (alle drei im Handlungsfeld „Wald- und Forstwirtschaft“) sowie „Entkopplung von Nahrungsbeziehungen in der Ostsee“ und „Verbreitung von Fischarten“ (Handlungsfeld „Fischerei“).

Die mittlere Anpassungsdauer in diesem Systembereich liegt zwar im Durchschnitt aller Klimawirkungen, sie streut aber recht stark. So ergibt sich, dass für zwei Klimawirkungen („Hitze und Trockenstress“ sowie „Stress durch Schädlinge/Krankheiten“, beide im Handlungsfeld „Wald- und Forstwirtschaft“) die Zeit zur Anpassung jetzt schon kaum noch ausreicht bis zur Mitte des Jahrhunderts (Anpassungsdauer über 50 Jahre), sofern es zu einem starken Klimawandel kommt.

Die Gewissheit der Einschätzungen ist für die Gegenwart noch relativ hoch, sinkt aber für die Zukunft auf den Gesamtdurchschnitt aller Systembereiche. Mit zehn Klimawirkungen, die sehr

dringenden Handlungserfordernisse aufweisen, gibt es in diesem Systembereich absolut gesehen besonders viele Fälle, relativ gesehen sind es allerdings nicht mehr als in anderen Systembereichen auch. Hinzu kommen sechs Klimawirkungen mit dringendem Handlungsbedarf.

### **Infrastrukturen und Gebäude**

Die 23 Klimawirkungen im Systembereich „Infrastrukturen und Gebäude“ sind vor allem den Handlungsfeldern „Verkehr, Verkehrsinfrastruktur“, „Bauwesen“, „Energiewirtschaft“ sowie „Industrie und Gewerbe“ zugeordnet. Weitere kommen noch aus anderen Handlungsfeldern hinzu, so etwa aus der Wasserwirtschaft oder dem Küsten- und Meeresschutz. Typische Beispiele sind „Belastung oder Versagen von Hochwasserschutzsystemen“, „Beschädigung oder Zerstörung von Siedlung und Infrastruktur an der Küste“, „Schäden/Hindernisse bei Straßen und Schienenwegen (gravitative Massenbewegungen)“, „Schäden an Gebäuden aufgrund von Starkregen“ oder

„Ertragsminderung/-zunahme bei Photovoltaikanlagen und bei Windenergieanlagen an Land und auf See“. Räumlich sind diese Klimawirkungen an das Vorhandensein von Infrastrukturen oder Gebäuden, einschließlich von Anlagen, gebunden. Dies bedeutet aber nicht, dass sie allein gebündelt in urbanen Räumen auftreten würden. Verkehrswege oder Hochwasserschutzsysteme etwa sind großflächig verteilt.

Klimarisiken entstehen häufig im Zusammenhang mit Starkregen, Überschwemmungen und Überflutungen und damit verbunden Unterspülungen und Hangrutschungen. Hier ergeben sich Risiken für die gebaute Umwelt, etwa bei den Klimawirkungen „Belastung oder Versagen von Hochwasserschutzsystemen“ (Handlungsfeld „Wasserhaushalt, Wasserwirtschaft“), „Schäden an Gebäuden“ (Handlungsfeld „Bauwesen“) und „Schäden an Verkehrswegen“ (Handlungsfeld „Verkehr, Verkehrsinfrastruktur“). Eine größere Rolle spielt potentiell auch Starkwind, wengleich hierzu keine klaren Projektionen vorliegen. Speziell im Küstenbereich kommt der Meeresspiegelanstieg zum Tragen, der in Verbindung mit Sturmfluten zu Risiken etwa bei der Klimawirkung „Beschädigung oder Zerstörung von Siedlung und Infrastruktur an der Küste“ führt. Der Klimawandel reduziert aber auch Risiken in diesem Systembereich. Das gilt vor allem für das verringerte Auftreten von Frost, weniger Schneefall und eine Reduktion bei Schnee- und Eislasten.

Die Klimarisiken ohne Anpassung sind in diesem Bereich deutlich niedriger als der Durchschnitt aller Klimawirkungen. Im Schnitt sind sie etwa eine halbe Stufe niedriger bewertet als die Klimarisiken im Systembereich „Natürliche Systeme und Ressourcen“. Die vergleichsweise geringen Klimarisiken ergeben sich über alle Zeitscheiben und beide Fälle (optimistisch und pessimistisch). Mitte des Jahrhunderts sind sechs Klimawirkungen im pessimistischen Fall mit hoch bewertet, also etwa ein Viertel, Ende des Jahrhunderts dann acht, also etwa ein Drittel.

Den tendenziell geringeren Klimarisiken steht eine besonders hohe Wirksamkeit der Anpassung gegenüber, die auch wenig davon beeinflusst wird, ob der Klimawandel stärker oder schwächer ausfällt. Sowohl für die Gegenwart als auch für Mitte des Jahrhunderts und mit Blick auf beschlossene wie auch auf weiterreichende Maßnahmen im pessimistischen und im optimistischen Fall sind die Möglichkeiten der Klimaanpassung im Vergleich zu den anderen Systembereichen relativ hoch. Die beschlossenen Maßnahmen werden in diesem Systembereich bereits als recht wirksam eingeschätzt. Mit weiterreichender Anpassung können die Auswirkungen des Klimawandels noch weiter erheblich reduziert werden. Die Gewissheit bei den Bewertungen liegt bei den Anpassungsmaßnahmen (sowohl bei den beschlossenen als auch bei den weiterreichenden) deutlich über den anderen Systembereichen.

Die Kombination aus geringeren Risiken ohne Anpassung und hoher Wirksamkeit von Anpassung kann zu einer deutlich besseren Risikosituation zur Mitte des Jahrhunderts (im Vergleich

zu anderen Systembereichen) führen. Mit einer weiterreichenden Anpassung können die resultierenden Klimarisiken auch im pessimistischen Fall auf „mittel“ oder „gering-mittel“ eingegrenzt werden. Vor diesem Hintergrund ist auch die meist mittlere Anpassungsdauer (länger als in anderen Systembereichen) weniger kritisch. Mit seinen sieben sehr dringenden Handlungserfordernissen liegt der Bereich in etwa im Durchschnitt aller Systembereiche. Die ebenfalls sieben dringenden Handlungserfordernisse sind hingegen überdurchschnittlich viele.

### **Naturferne Wirtschaftssysteme**

„Naturferne Wirtschaftssysteme“ sind ein relativ kleiner Bereich mit nur sieben Klimawirkungen. Im Wesentlichen entstammen diese dem Handlungsfeld „Industrie und Gewerbe“; hinzu kommen noch Klimawirkungen aus den Handlungsfeldern „Tourismuswirtschaft“ und „Bauwesen“. Eine räumliche Zuordnung ist kaum möglich. Ein besonders relevanter klimatischer Einfluss in diesem Systembereich ist der graduelle Temperaturanstieg (zum Beispiel „Verlagerung der Nachfrage“ im Handlungsfeld „Tourismuswirtschaft“ und „Beeinträchtigung der Versorgung mit Rohstoffen und Zwischenprodukten (international)“ im Handlungsfeld „Industrie und Gewerbe“). Hinzu kommen Klimaextreme (zum Beispiel Hitze, Starkregen) die sich auf mehrere Klimawirkungen auswirken (zum Beispiel „Beeinträchtigung von Produktionsprozessen“ und „Aufwand für die betriebliche Planung“, beides aus dem Handlungsfeld „Industrie und Gewerbe“). Gleichzeitig gibt es in diesem Systembereich recht häufig auch positive Effekte von Änderungen der klimatischen Einflüsse, etwa durch geringeres Vorkommen von Frost, verringertem Schneefall und geringere Schnee- und Eislasten. Der Klimawandel kann hier (teils vermittelt über vorgelagerte Klimawirkungen) teils vorhandene Risiken beispielsweise bei den Klimawirkungen „Beeinträchtigung von Produktionsprozessen“ und „Aufwand für die betriebliche Planung“ (beides Handlungsfeld „Industrie und Gewerbe“) senken. Auch der Anstieg der Durchschnittstemperaturen kann partiell die Situation bei einigen Klimawirkungen wie „Zeiten für Bautätigkeit“ (Handlungsfeld „Bauwesen“) oder „Wirtschaftliche Chancen und Risiken für die Tourismuswirtschaft“ (Handlungsfeld „Tourismuswirtschaft“) verbessern.

Die Klimarisiken wurden insgesamt in diesem Systembereich als noch deutlich niedriger als im Systembereich „Infrastrukturen und Gebäude“ und mit Abstand als die niedrigsten von allen Systembereichen bewertet. Dies gilt über alle Zeitscheiben und in beiden der betrachteten Fälle (pessimistisch und optimistisch). Nur eine Klimawirkung scheint zur Mitte des Jahrhunderts bei starkem Klimawandel mit einem hohen Risiko behaftet zu sein („Beeinträchtigung der Versorgung mit Rohstoffen und Zwischenprodukten (international)“) und nur zwei zum Ende des Jahrhunderts. Die Gewissheit bei diesen Einschätzungen ist allerdings relativ gering, was daran liegen könnte, dass bei den „Naturfernen Wirtschaftssystemen“ sehr viele Faktoren zum Tragen kommen und der Einfluss der Klimawandels teils nur vermittelt stattfindet. In der Tat weist der Systembereich sehr viele eingehende Wirkbeziehungen von anderen Systembereichen auf, relativ gesehen deutlich mehr als jeder andere Systembereich.

Zum Anpassungspotential lässt sich bei diesem Systembereich keine Aussage treffen, da nur eine Klimawirkung („Beeinträchtigung der Versorgung mit Rohstoffen und Zwischenprodukten (international)“) mit Blick auf die Wirksamkeit von Anpassungsmaßnahmen untersucht wurde. Mit Blick auf die Anpassungsdauer zeichnet sich aber ein klares Bild: Kein Systembereich weist eine so kurze Anpassungsdauer auf. Bei allen Klimawirkungen werden (den Experteneinschätzungen zufolge) Anpassungsmaßnahmen in weniger als zehn Jahren wirksam. Angesichts der kurzen Anpassungsdauer und der relativ geringen Klimarisiken ohne Anpassung sind auch die Handlungserfordernisse in diesem Bereich gering: Sehr dringende Handlungserfordernisse existieren nicht und nur zwei dringende.

## Menschen und soziale Systeme

Neben allen ökologischen, technischen und wirtschaftlichen Systemen sind letztlich auch der Mensch selbst und das Gesundheitssystem unmittelbar vom Klimawandel betroffen. Der entsprechende Systembereich zählt neun Klimawirkungen, wie etwa „Hitzebelastung“, „Allergische Reaktionen durch Aeroallergene pflanzlicher Herkunft“ oder auch „Atembeschwerden (aufgrund von Luftverunreinigungen)“. Fast alle dieser Klimawirkungen gehören zum Handlungsfeld „Menschliche Gesundheit“. Einzige Ausnahme ist die Klimawirkung „Leistungseinbußen von Beschäftigten“ aus dem Handlungsfeld „Industrie und Gewerbe“.

Der mit Abstand wichtigste klimatische Einfluss für diesen Systembereich ist Hitze. Hitze ist die am stärksten unterschätzte Naturgefahr. Sie ist unter allen Naturgefahren die häufigste Todesursache in Deutschland. Entsprechend sind die Hotspots im Systembereich „Menschen und soziale Systeme“ auch vornehmlich Siedlungsflächen in den warmen Gegenden Deutschlands, insbesondere die städtischen Ballungszentren, wo Wärmeinseleffekte stärker auftreten.

Auch andere Wetterextreme, insbesondere Sturzfluten bedingt durch Starkregen, oder Stürme, können zu Todesfällen und Verletzten führen. Neben Hitze ist UV-Strahlung ein weiterer Einflussfaktor für die Gesundheit, da bei zunehmender Sonnenstrahlung die Hautkrebsgefahr steigt. Viele Klimarisiken werden zudem von dem graduellen Temperaturanstieg beeinflusst, der – meist über Veränderungen der natürlichen Systeme und Ressourcen – die Gesundheit der Menschen beeinträchtigt, beispielsweise durch die Verbreitung von Allergenen oder Vektoren sowie die Veränderung der Luftqualität.

Die Klimarisikosituation ohne Anpassung scheint insgesamt ungünstig zu sein. Für die Gegenwart weist der Bereich die höchsten Risiken von allen Systembereichen auf (bei gleichzeitig einer recht hohen Gewissheit in der Einschätzung). Die Klimawirkung „Hitzebelastung“ ist die einzige aller betrachteten Klimawirkungen, die schon in der Gegenwart mit hoch bewertet wurde. Zur Mitte des Jahrhunderts können im Falle eines starken Klimawandels ein Drittel der Klimawirkungen in dem Systembereich mit hohem Klimarisiko behaftet sein, was etwas unter dem Durchschnitt aller Systembereiche liegt. Gegen Ende des Jahrhunderts kann die Zahl aber stark ansteigen auf zwei Drittel. Für die ferne Zukunft ist die Bewertung der Klimarisiken auf gleicher Höhe mit der der „Natürlichen Systeme und Ressourcen“, also relativ hoch. Die Gewissheit der Bewertung ist Mitte des Jahrhunderts recht hoch, Ende des Jahrhunderts dann im Durchschnitt aller Systembereiche.

Da nur bei drei Klimawirkungen die Anpassungskapazität genauer betrachtet wurde, lassen sich keine validen Aussagen zu den Anpassungsmöglichkeiten in dem gesamten Systembereich machen. Bei den drei untersuchten Klimawirkungen können auch im pessimistischen Fall Mitte des Jahrhunderts die Klimarisiken durch weiterreichende Anpassung auf mittel reduziert werden. Offenkundig ist, dass schon viele Maßnahmen auf den Weg gebracht worden sind. Auch wird die Anpassungsdauer auf eher kurz eingeschätzt (in zwei Drittel der Fälle auf unter zehn Jahre), was für die künftige Anpassung vorteilhaft ist. Mit drei sehr dringenden Handlungserfordernissen liegt der Systembereich im Durchschnitt, mit drei dringenden Handlungserfordernissen allerdings deutlich höher als der Schnitt aller Systembereiche.



Abbildung 24: Klimarisiken von betroffenen Systemen, Wirkbeziehungen und Dringlichkeit von Anpassung

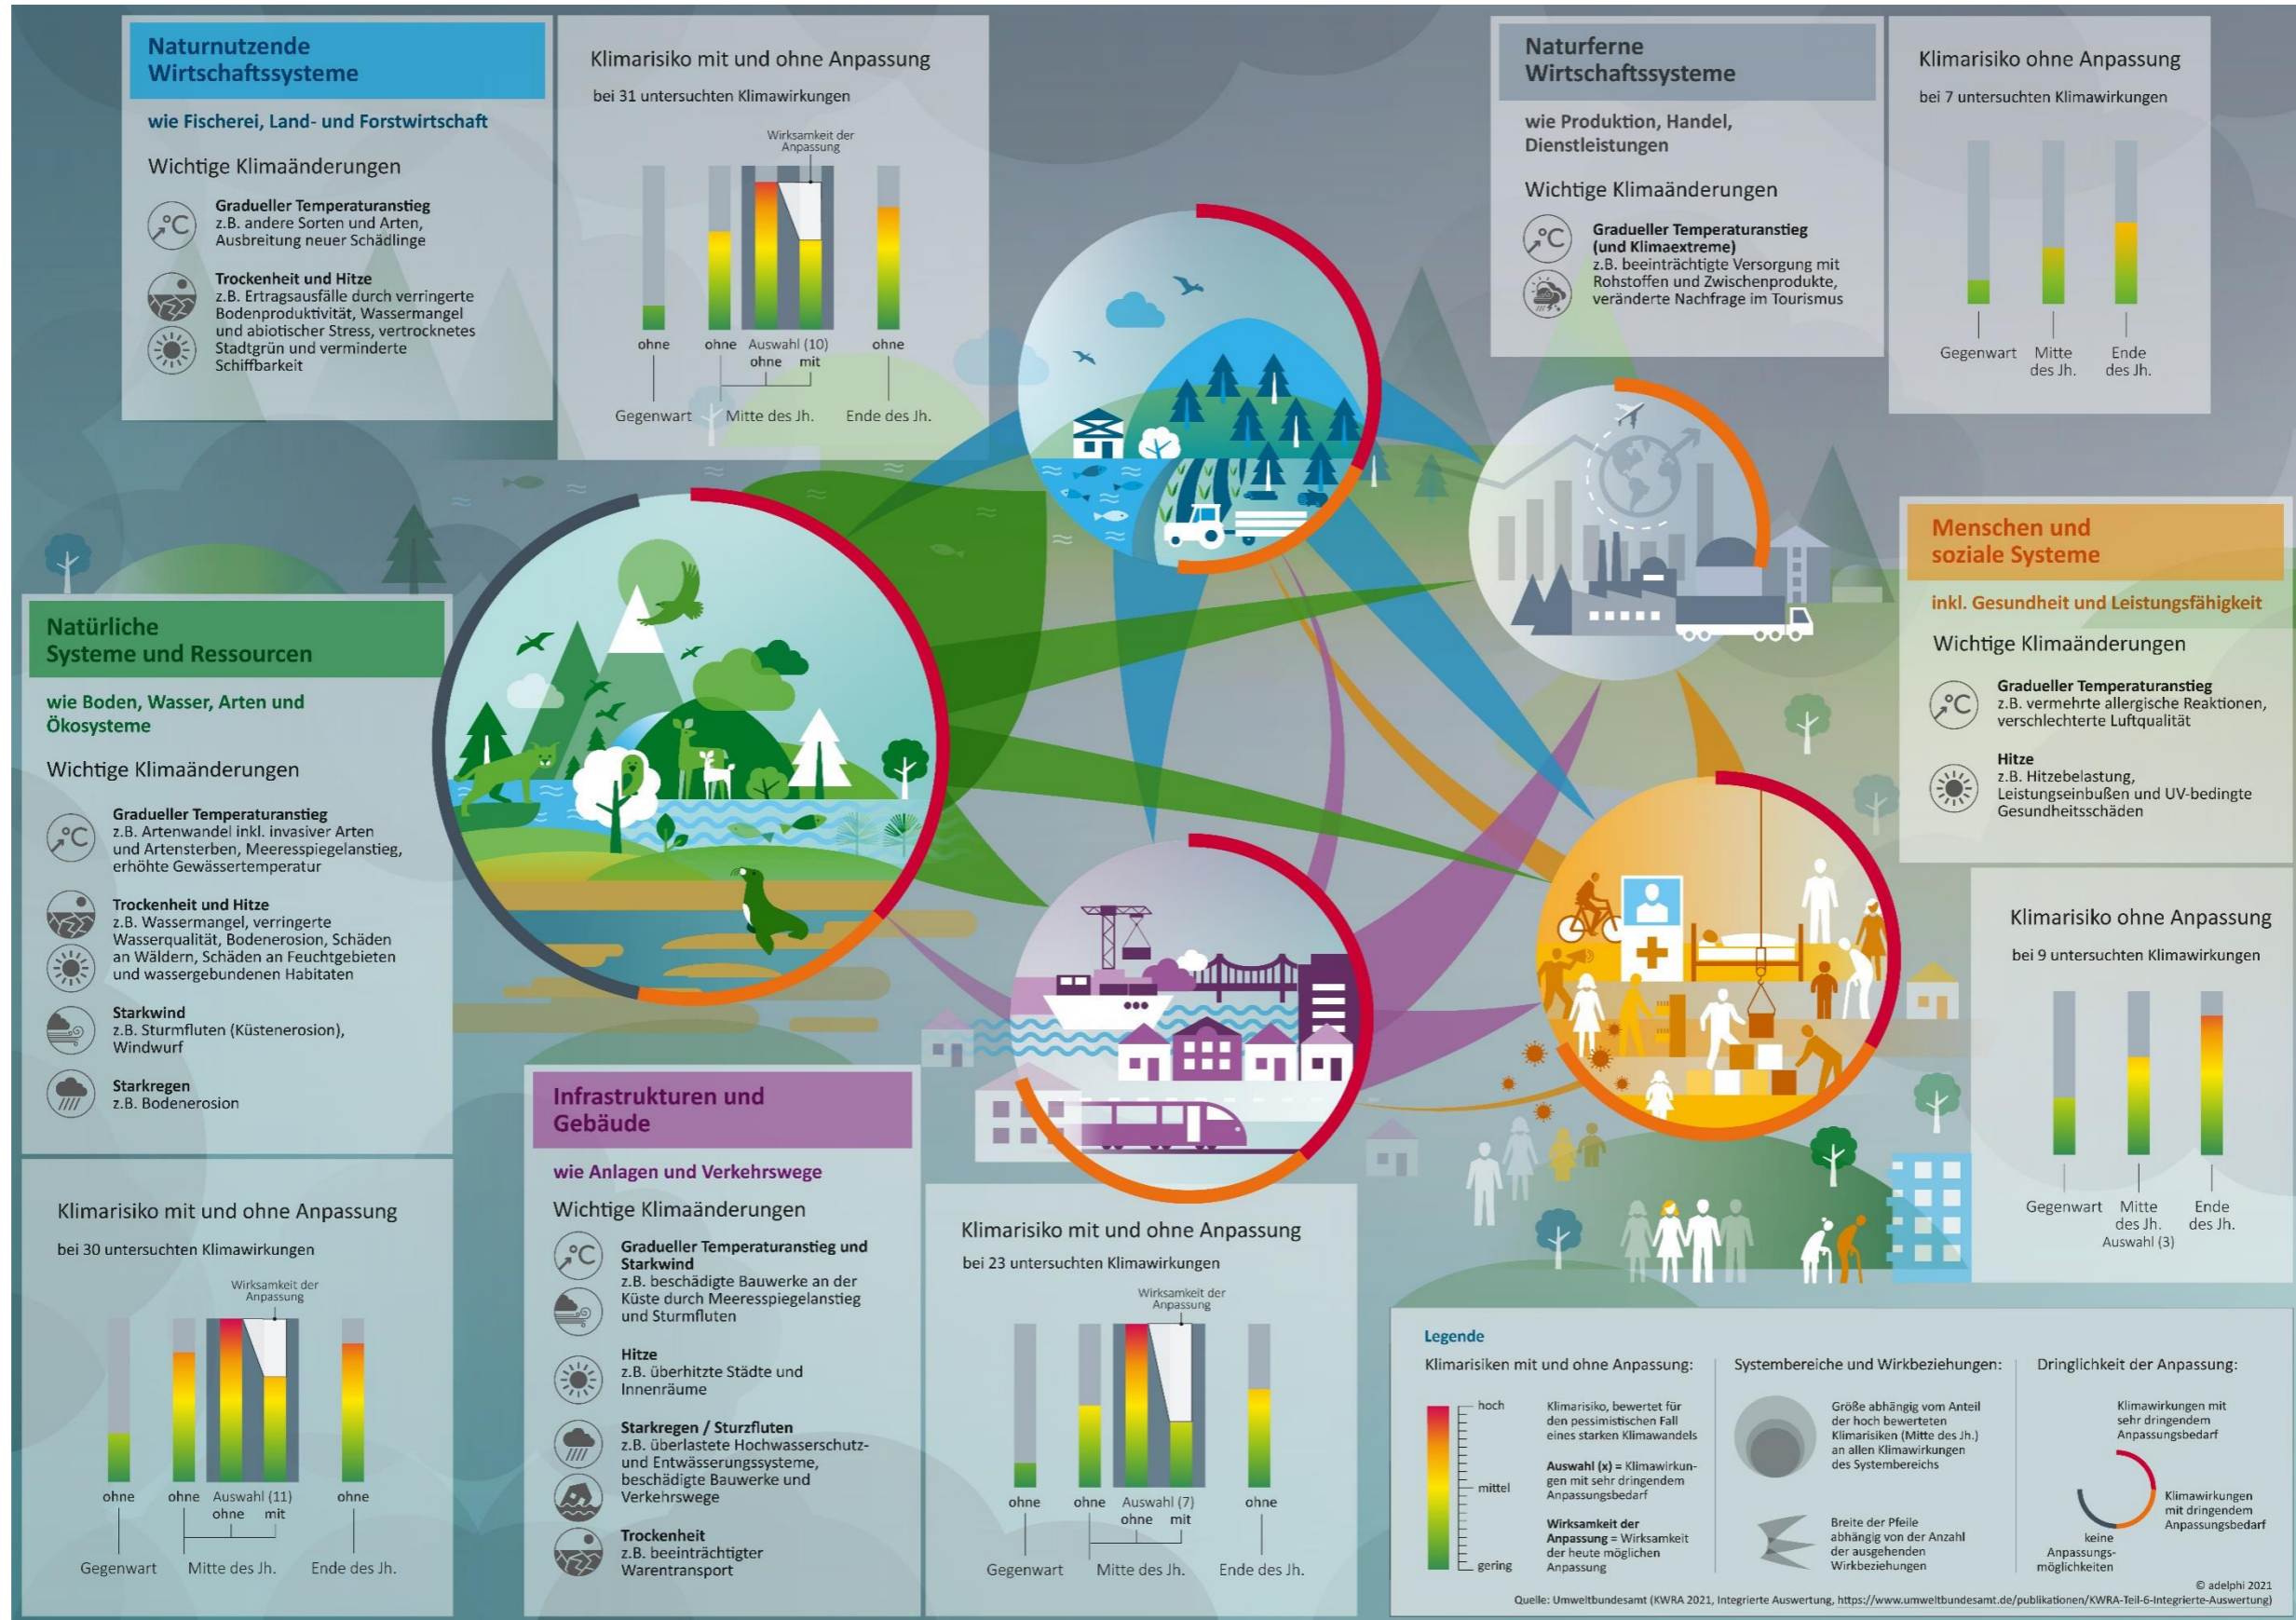



Die Analyse nach verschiedenen Systembereichen erlaubt es, verschiedene weitere Schlussfolgerungen zu ziehen, die für die Anpassungsplanung relevant sein können.

Wie aus den bisherigen Ausführungen hervorgeht, ist der Systembereich „Natürliche Systeme und Ressourcen“ grundsätzlich stärker vom Klimawandel betroffen als die anderen Systembereiche. Gleichzeitig ist hier die Anpassungsdauer tendenziell deutlich höher und es kommt hinzu, dass die Wirksamkeit von Anpassungsmaßnahmen vergleichsweise gering ist. Diese Situation ist in sich schon ungünstig. Besonderer Beachtung bedarf sie aufgrund der Verflechtungen der einzelnen Systeme.

Wie schon aus Kapitel 3.4 ersichtlich, gibt es eine relativ enge Verknüpfung zwischen den einzelnen Klimawirkungen und damit auch zwischen Handlungsfeldern und Systembereichen. Diese Verknüpfungen sind nicht gleichmäßig, bestimmte Klimawirkungen spielen eine vergleichsweise zentrale Rolle. Die Sortierung nach Systembereichen liefert hier ein recht deutliches Bild: Klimawirkungen aus dem Systembereich „Natürliche Systeme und Ressourcen“ haben viel häufiger ausgehende Wirkbeziehungen, das heißt, sie sind vorgelagert und wirken auf nachgelagerte Klimawirkungen in anderen Systembereichen ein. Mehr als die Hälfte aller ausgehenden Wirkbeziehungen entfallen auf diesen Systembereich (Tabelle 28).

**Tabelle 28: Ausgehende und eingehende Querverbindungen der fünf Systembereiche**

Die hier dargestellten Querverbindungen beziehen nicht diejenigen Klimawirkungen ein, die als vorgelagerte Wirkungen direkt von klimatischen Einflüssen ausgelöst werden und selbst nur physische Effekte darstellen. Die Spaltensumme beinhaltet die Anzahl der ausgehenden Wirkbeziehungen zu den jeweils vier anderen Systembereichen.

| von                               | zu | Natürliche Systeme und Ressourcen | Naturnutzende Wirtschaftssysteme | Infrastrukturen und Gebäude | Naturferne Wirtschaftssysteme | Menschen und soziale Systeme | Summe (ausgehend) |
|-----------------------------------|----|-----------------------------------|----------------------------------|-----------------------------|-------------------------------|------------------------------|-------------------|
| Natürliche Systeme und Ressourcen |    | 24                                | 50                               | 13                          | 9                             | 8                            | 80                |
| Naturnutzende Wirtschaftssysteme  |    | 6                                 | 44                               | 13                          | 8                             | 8                            | 35                |
| Infrastrukturen und Gebäude       |    | 3                                 | 3                                | 26                          | 13                            | 11                           | 30                |
| Naturferne Wirtschaftssysteme     |    | 0                                 | 0                                | 0                           | 5                             | 0                            | 0                 |
| Menschen und soziale Systeme      |    | 0                                 | 4                                | 1                           | 7                             | 6                            | 12                |

Teilweise sind die ausgehenden Effekte unmittelbar bemerkbar für die nachfolgenden Systeme, teilweise werden sich die entsprechenden Wirkungen erst mit Verzögerungen, gegebenenfalls erst viele Jahre später, wirklich niederschlagen.

Bei der Bewertung der Klimarisiken konnte schon systematisch kein Bezug darauf genommen werden, inwiefern die Anpassung an den Klimawandel bei den vorgelagerten Klimawirkungen erfolgreich sein wird oder nicht.<sup>30</sup> Es besteht vor diesem Hintergrund das Risiko, dass für nach-

<sup>30</sup> Die Einschätzung der Anpassungskapazitäten erfolgte (aus methodischen Gründen) zeitlich erst nach der Bewertung der Klimarisiken ohne Anpassung (siehe Teilbericht 1, „Konzept und Methodik“).

gelagerte Klimawirkungen das Bild verzerrt wurde in der Erwartung, dass sich nur geringe Effekte aus den vorgelagerten Klimawirkungen durchschlagen würden. Und obwohl in der KWRA 2021 Wirkbeziehungen wesentlich systematischer erfasst worden sind, als dies im Rahmen der VA 2015 der Fall war, kann nicht davon ausgegangen werden, dass alle Wirkbeziehungen tatsächlich berücksichtigt wurden.

Wichtiger noch als dieser (methodische) Hinweis ist die Erkenntnis, dass der Blick verstärkt auf vorgelagerte Klimawirkungen gerichtet werden sollte und hier insbesondere auf den Systembereich der „Natürlichen Systeme und Ressourcen“, von dem aus die meisten Klimawirkungen ausgehen. Wenn es gelingt, in diesem Bereich die Auswirkungen des Klimawandels einzugrenzen, dann kann dies für sehr viele Klimawirkungen in anderen Systembereichen positive Effekte haben und den Erfolg von Anpassung auch in diesen Systembereichen spürbar fördern. Umgekehrt gilt aber auch, wenn es nicht gelingt, im Bereich der „Natürlichen Systeme und Ressourcen“ zu einer wirksamen Anpassung an den Klimawandel zu gelangen, so wird dies Rückwirkungen auf alle anderen Systembereiche, also die „Naturnutzenden Wirtschaftssysteme“, „Infrastrukturen und Gebäude“, „Naturferne Wirtschaftssysteme“ und letztlich „Menschen und soziale Systeme“ haben.

Diese Aussage wird gestützt durch die Untersuchungen zu den Sensitivitätsfaktoren, das heißt der Faktoren, die die Empfindlichkeit der betroffenen Systeme gegenüber Klimaänderungen beeinflussen (siehe 3.2). Auch hier zeigte sich, dass gerade Faktoren, die natürliche Ressourcen betreffen, wie Landnutzung oder Wassernutzung, besonders häufig in verschiedenen Handlungsfeldern und bei vielen Klimawirkungen wichtig für die Empfindlichkeit der betroffenen Systeme sind. Der Schutz dieser Sensitivitätsfaktoren beziehungsweise ihre positive Beeinflussung in Richtung stärkerer Klimaresilienz wirkt sich also in vielfacher Hinsicht positiv aus.

Daher scheint es für die Anpassungsfähigkeit vieler betroffener Systeme wichtig zu sein, vorbeugend zukünftige Zielkonflikte, insbesondere bei der Nutzung von Wasserressourcen wie auch bei der Nutzung von Landressourcen, einzugrenzen. Im Zuge des Klimawandels werden beide Ressourcen künftig verstärkt beansprucht werden. Im Bereich Wasser ist dies bereits offenkundig, bei den Landressourcen wird es in der Zukunft noch deutlicher werden. Hier wird der Raumplanung künftig eine noch gewichtigere Rolle zukommen.

Verstärkend zu den in Kapitel 6 dargelegten Erörterungen zur Dringlichkeit von Klimaanpassung besteht aufgrund der geschilderten Effekte ein besonderes Handlungserfordernis im Bereich der „Natürlichen Systeme und Ressourcen“. Auch wenn die in der KWRA 2021 gewählte Methodik es nicht erlaubt, für einzelne Klimawirkungen Handlungserfordernisse aus Kaskadeneffekten heraus abzuleiten (nicht evaluiert wurde, wie genau und wie stark bestimmte Klimawirkungen auf andere einwirken und ob Verzögerungseffekte eintreten), so lässt sich für den gesamten Systembereich schließen, dass Klimaanpassung bei „Natürlichen Systemen und Ressourcen“ eine besonders große und wichtige Rolle spielt.

Wie erwähnt sind jedoch die Möglichkeiten erfolgreicher Klimaanpassung gerade in dem Systembereich „Natürliche Systeme und Ressourcen“ besonders eingeschränkt. Neben Klimaschutz scheint daher die hauptsächliche Einwirkungsmöglichkeit darin zu bestehen, die autonome Anpassungsfähigkeit sowie die Funktionsfähigkeiten der Systeme zu stärken und deren Einschränkungen zu reduzieren. Hierfür bedarf es einer grundsätzlichen Entlastung dieser Systeme von aktueller Übernutzung und Überbeanspruchung durch den Menschen.

## 8 Forschungsbedarf

Autoren: Walter Kahlenborn, Luise Porst, Maike Voß | adelphi, Berlin  
Uta Fritsch, Kathrin Renner, Marc Zebisch | Eurac Research, Bozen  
Mareike Wolf | Bosch & Partner, München

### 8.1 Einleitung

In den Teilberichten 1 bis 5 der KWRA 2021 wird der aktuelle Wissenstand des Bundes bezüglich der Auswirkungen des Klimawandels auf Deutschland und zu den Möglichkeiten der Anpassung dargestellt. Bei der Erarbeitung wurden neben vielen Erkenntnissen auch Wissensdefizite und damit verbundener Forschungsbedarf identifiziert.

Die Einschätzungen der verschiedenen Experten und Expertinnen der Netzwerkpartner zur Gewissheit bei der Bewertung des Klimarisikos ohne Anpassung und zur Gewissheit bei der Bewertung der Anpassungskapazitäten reflektieren den unterschiedlichen Wissenstand. In vielen Bereichen verfügen die Experten und Expertinnen schon heute über eine mittlere und teils auch hohe Gewissheit, viele andere Bereiche weisen jedoch noch erhebliche Ungewissheiten auf. Insgesamt ist der Kenntnisstand zu den Klimarisiken nicht ausreichend. Die weitere Verbesserung der Datengrundlagen und der Kenntnislage zu den Wirkzusammenhängen ist erforderlich.

Grundsätzlich sind integrierte Klimarisikoanalysen komplexe Untersuchungen mit dem Ziel, das Zusammenspiel einer Vielzahl verschiedener, mit Unsicherheiten behafteter Einflussfaktoren in die Zukunft zu projizieren. Die Anzahl der zu berücksichtigenden Faktoren und damit die Komplexität werden noch weiter erhöht, sobald Anpassungskapazität mit betrachtet wird. Die KWRA 2021 hat zudem – im Einklang mit verschiedenen internationalen Forschungsarbeiten (Ford et al. 2010; EEA 2017; Adger et al. 2018; EEA 2018) – die starke Kontextabhängigkeit von Klimarisiken verdeutlicht. Dies bedeutet, dass zur Generierung von belastbaren Aussagen die Betrachtung sowohl spezifischer Einflussfaktoren als auch ihrer Wechselwirkungen erforderlich ist und allgemeine Aussagen auf der Basis von wenigen Indikatoren kaum möglich sind.

Angesichts der geschilderten Komplexität ist eine kontinuierliche Fortführung der Forschung in zahlreichen Bereichen erforderlich. Im Vordergrund sollten dabei solche Klimawirkungen stehen, bei denen das erwartete zukünftige Risiko hoch ist. Ebenso kommt der Forschung da eine besondere Rolle zu, wo aufgrund von zu großen Unsicherheiten zurzeit eine Risikoabschätzung noch nicht möglich ist. Für die Untersuchung der komplexen, sektorenübergreifenden Wirkzusammenhänge zwischen Klimarisiken sind umfassende Forschungsansätze und längerfristig ausgerichtete Forschungsprogramme unerlässlich.

Dass ein breit und dauerhaft angelegtes Vorgehen wie bei den Klimawirkungs- und Risikoanalysen des Bundes grundsätzlich zielführend ist, zeigen die Fortschritte in dem Zeitraum zwischen der VA 2015 und der KWRA 2021. Forschungsfortschritte gab es in diesem Zeitraum in verschiedenen Bereichen, so etwa neuere und verbesserte Klimadaten (Hübener et al. 2017; Brien et al. 2020), deutlich bessere Kenntnisse der Wirkzusammenhänge (beispielsweise durch die Arbeiten des BMVI-Expertenetzwerks im Bereich Verkehr) sowie erste neue Einsichten zu bislang wenig betrachteten Klimawirkungen (beispielsweise zum Zusammenhang zwischen Klimawandel und UV-bedingten Gesundheitsschädigungen). Diese Fortschritte sind in die KWRA 2021 eingeflossen und haben zu einer Präzisierung der Ergebnisse und teils auch zu einer Veränderung der Bewertungen geführt (siehe 2.2).

Im Folgenden werden exemplarisch wichtige zukünftige Forschungsfragen, deren Aufarbeitung die wissenschaftliche Basis für künftige Klimarisikoanalysen noch einmal deutlich verbessern

könnte, benannt. Hinzuweisen ist gleichzeitig auf die vielen Forschungsthemen, die im APA III schon adressiert werden.

## 8.2 Forschungsbedarf zu Analyse- und Bewertungsverfahren

Die KWRA 2021 beinhaltet gegenüber der VA 2015 in methodischer Hinsicht mehrere Weiterentwicklungen (siehe Teilbericht 1, „Konzept und Methodik“). Bei der Konzeption der KWRA 2021 wurde auf den Erfahrungen der VA 2015, der Bundesländer und nationaler Klimarisikoanalysen anderer Länder aufgebaut. Die Erfahrungen mit der VA 2015, wie sie im „Vulnerability Sourcebook“ der Gesellschaft für Internationale Zusammenarbeit (GIZ) (Fritzsche et al. 2014) und den Leitfaden für Klimawirkungs- und Vulnerabilitätsanalysen (Buth et al. 2017) eingeflossen sind, gaben Hinweise, welche methodischen Bausteine und welche Prozessgestaltung für erfolgreiche Klimawirkungs- und Risikoanalysen nützlich sind. Diese Erfahrungen wurden in der KWRA 2021 nochmals bestätigt und sind auch international durch die ISO 14091 aufgegriffen worden.

Während hier also enge Bezüge hergestellt worden sind zu verschiedenen konzeptionellen Vorarbeiten, war der Rückgriff auf die Breite der bisherigen Forschungsliteratur zu methodischen Ansätzen von Klimarisikoanalysen schwierig. Eine systematische Aufbereitung der sehr zahlreichen internationalen Erfahrungen mit Klimarisikoanalysen liegt bisher nur sehr ausschnittsweise vor. Die aus Sicht der praktischen Anwendung wichtige Frage, welche methodischen Ansätze für bestimmte Zielsetzungen und unter bestimmten gegebenen Rahmenbedingungen (zeitliche, räumliche, resourcentechnische, vorhandene Wissensstände) besonders geeignet sind, ist bisher vonseiten der Forschung unbeantwortet. Die zahlreichen wissenschaftlichen Publikationen zu Klimarisikoanalysen erlauben dazu bislang auch keine gute Auswertung, denn die notwendigen Informationen liegen nur sehr heterogen vor. Aktuelle Bemühungen der GIZ, systematisch Klimarisiko- und Vulnerabilitätsanalysen zu erfassen und auszuwerten, sind ein Schritt in diese Richtung, es bedarf jedoch umfassenderer Metaanalysen, um genaue Aussagen treffen zu können. Eine spezifische Fragestellung, der in diesem Rahmen nachgegangen werden sollte, wäre eine Auswertung dazu, wie man quantitative und qualitative Verfahren zur Operationalisierung gut miteinander verknüpfen kann und wann sich welcher methodische Zugang besser eignet. Interessant wäre ferner eine Analyse der bisherigen Erfahrungen, wie Schwellenwerte zur Bedeutung von Klimawirkungen auch handlungsfeld- und schutzgutübergreifend so gesetzt werden können, dass sie auf ein hohes Maß von Akzeptanz treffen. Mit Blick auf qualitativ basierte Klimarisikoanalysen könnte ein Quervergleich bisheriger Studien auch Erkenntnisgewinne erbringen dazu, wie mögliche Bewertungsprobleme adressiert werden können, die sich aus einem Bias bei der Zusammensetzung von Expertengremien ergeben.

Ein weiterer Aspekt, der zukünftig im Kontext von Klimarisikoanalysen eine noch stärkere Rolle spielen sollte, ist die Frage, wie die Einschätzung der Gewissheit bei der Beurteilung von Klimarisiken durch Experten und Expertinnen möglichst zweckmäßig und objektiviert erfolgen kann. Das Vorgehen des IPCC ist an dieser Stelle beispielhaft, kann aber im Rahmen einzelner Klimarisikoanalysen aufgrund des hohen Aufwandes nicht analog umgesetzt werden. Eine genaue Betrachtung, wie methodisch möglichst fundiert Gewissheiten im Rahmen von einzelnen Klimarisikoanalysen abgeschätzt werden können, ist daher ein weiterer Forschungsauftrag.

Ein besonderer Schwerpunkt der KWRA 2021 lag im Bereich der Bewertung der Anpassungskapazität. Hierbei wurden über verschiedene methodische Zugänge, Aussagen zur Anpassungskapazität sowohl auf der Ebene der einzelnen Klimawirkungen als auch auf der Ebene der Handlungsfelder sowie schließlich auf generischer Ebene getroffen. Die Beurteilung auf generischer Ebene folgt einem ähnlichen, vorwiegend indikatorbasierten Ansatz wie dem innerhalb der VA 2015 und wie er auch andernorts in der Vergangenheit oftmals angewandt worden ist. Bei der

Implementierung des Ansatzes zeigte sich jedoch, dass erstens die Wirkzusammenhänge zwischen bestimmten übergeordneten Indikatoren, wie Wirtschaftskraft (Bruttoinlandsprodukt pro Einwohner) oder finanzielle Ausstattung öffentlicher Haushalte (Gemeindliche Steuerkraft pro Einwohner), und der tatsächlichen Anpassungskapazität nur sehr vermittelt bestehen und dass zweitens für verschiedene relevante Aspekte die notwendigen Daten fehlen. Quantitative Aussagen, die räumlich differenziert ein genaues Bild der Anpassungskapazität in Deutschland zeichnen, lassen sich auf der Basis des bisherigen Datenstands nicht treffen. Forschungsinhalt sollten daher zum einen Indikatoren sein, die enger an die tatsächliche Anpassungskapazität anknüpfen, und zum anderen die hierfür unmittelbar erforderlichen vergleichbaren Datensätze.

Ein weiterer Aspekt, der in methodischer Hinsicht noch stärkerer Beachtung bedarf, ist die Konzeption und Nutzung von Anpassungsdimensionen, um Aussagen über den Bedarf und das Potenzial an Anpassung treffen zu können. Die Verwendung von Anpassungsdimensionen als Analyseinstrument erfordert weitere konzeptionelle Klärungen. Insbesondere sind Vergleiche zwischen unterschiedlichen Definitionen einzelner Anpassungsdimensionen in verschiedenen Klimarisikoanalysen sinnvoll und Auswertungen zu den damit verbundenen methodischen Implikationen.

Mittels Anpassungsdimensionen lassen sich Aussagen von der Ebene der Klimawirkungen auf übergeordnete Ebenen (Handlungsfelder und generische Anpassungskapazität) übertragen. Angesichts der grundsätzlichen Komplexität der Erfassung von Anpassungskapazität auf generischer Ebene stellt die Verknüpfung von Anpassungsdimensionen auf der Ebene von Klimawirkungen hin zu Anpassungsdimensionen auf generischer Ebene allerdings noch eine besondere methodische Herausforderung dar. Sowohl mit Blick auf die konkrete Umsetzung als auch bei der konzeptionellen Herangehensweise gibt es daher noch ein Bündel offener Forschungsfragen.

### **8.3 Forschungsbedarf zu Klimaprojektionen, Sensitivitäten und Klimawirkungsketten**

#### **Klimaprojektionen**

Mit Blick auf Klimaprojektionen und den hier vorherrschenden Forschungsbedürfnissen aus Sicht von Klimarisikoanalysen hat sich die Situation in den letzten Jahren nicht grundsätzlich geändert. Besondere Bedeutung haben nach wie vor praxisnahe Empfehlungen zum Umgang mit unabdingbaren Unsicherheiten in den Szenarien und Modellen.

Weiterentwickelte Klima- und Klimafolgenmodelle erlauben die verbesserte Abbildung von (lokal auftretenden) Extremwetterereignissen. Präzisere Aussagen zu Intensität und Eintrittswahrscheinlichkeit von konvektiven Niederschlagsereignissen, zur Häufigkeit und Intensität von Starkwindereignissen sowie zur Intensität und Dauer von Perioden Heißer Tage sind von großer Bedeutung für künftige Klimarisikoanalysen. Die entsprechenden klimatischen Einflüsse sind für viele Klimawirkungen entscheidend. Es fehlen Projektionen, die in diesem Kontext Aufschluss über die genau bestehenden Klimarisiken geben könnten.

Ein weiterer wichtiger Aspekt, der speziell für Klimarisikoanalysen noch eine große Rolle spielt, ist die genauere Analyse, wie gut die Modelle die Klimavariabilität abbilden. Dafür besteht Bedarf an (zeitlich und räumlich) höher aufgelösten Referenzdaten, insbesondere bezogen auf Projektionen von Windfeldern.

#### **Sensitivitäten**

Trotz der hohen Bedeutung von Sensitivitätsfaktoren bei der Bewertung von Klimarisiken gibt es vergleichsweise wenig wissenschaftliche Literatur sowohl zur generellen Abgrenzung als auch zur Charakterisierung dieser Faktoren. Obwohl viele Klimarisiken sehr kontextspezifisch



sind, ist nicht auszuschließen, dass bestimmte Sensitivitätsfaktoren eine übergeordnete Rolle spielen und letztlich bei vielen Klimawirkungen (mit) ausschlaggebend sind. Dies wäre für die Anpassungsplanung potenziell relevant. Um hier zu weiteren Einsichten zu gelangen, bedarf es ihrer besseren Klassifikation sowie der weiteren Untersuchung, welche Arten von Sensitivitätsfaktoren potenziell besondere Bedeutung über ein breiteres Spektrum von Klimawirkungen hinweg haben. Eine besondere Herausforderung ist dann auch die Projektion dieser potenziell besonders bedeutenden Sensitivitätsfaktoren in die Zukunft.

### **Klimawirkungsketten**

Die KWRA 2021 hat bezüglich der zugrunde liegenden Wirkungsketten unmittelbar auf den Vorarbeiten der VA 2015 aufgebaut. Die damals erarbeiteten und im Anschluss noch weiter vervollständigten Klimawirkungsketten waren Basis der bestehenden Analyse, sie wurden in der KWRA 21 nur an ausgewählten Stellen überarbeitet. Für die Zukunft wird es wichtig sein, die genaue Ausgestaltung der einzelnen Klimawirkungsketten noch einmal zu überarbeiten und dabei mehrere Aspekte zu berücksichtigen: Der aktuelle Kenntnisstand sollte in die Gesamtdarstellung der Wirkungsketten eingearbeitet werden. Dies bedeutet unter anderem, dass einige Klimawirkungen differenzierter erfasst werden und dass eine klarere Abgrenzung zwischen ähnlichen Klimawirkungen in miteinander verknüpften Handlungsfeldern erfolgt. Ferner sollten rein vorgelagerte Klimawirkungen klarer von den nachgelagerten Klimawirkungen getrennt werden. Darüber hinaus müssen die Wirkbeziehungen der einzelnen Klimawirkungen untereinander genauer herausgearbeitet werden. Dabei gilt es, die in der KWRA 2021 erfolgte, intensive Analyse von Querbezügen fortzusetzen und nach Möglichkeit nicht nur Querbezüge grundsätzlich auszuweisen, sondern auch die Relevanz dieser Querbezüge genauer zu ermitteln, um bessere Aussagen zu möglichen Kaskadeneffekten machen zu können.

Neben der noch intensivierten Berücksichtigung von Querbeziehungen ist die verstärkte Anwendung von Wirkmodellen ein weiterer wichtiger Ansatzpunkt zur Verbesserung der Aussagekraft künftiger Klimarisikoanalysen. Darüber hinaus sind die Ausweitung von Datengrundlagen und -verfügbarkeit sowie parallel dazu weitere Anstrengungen zur Entwicklung geeigneter Indikatoren für Klimawirkungen mit bundesweit einheitlich erhobenen Daten ebenfalls Bereiche, bei denen es noch deutlicher Forschungsanstrengungen bedarf.

## **8.4 Forschungsbedarfe zu den Handlungsfeldern**

### **8.4.1 Handlungsfeld Biologische Vielfalt**

Zentrale Aspekte der weiteren Forschung zu den Zusammenhängen zwischen der Biodiversität und dem anthropogenen Klimawandel sind phänologische Prozesse, invasive Arten und genetische Vielfalt. Zeitliche Verschiebungen in der Phänologie von Pflanzen und Tieren infolge des Klimawandels sind bisher nur für einzelne Arten nachgewiesen und hinsichtlich der Auswirkungen auf die Funktionalität von Ökosystemen bisher nur ansatzweise untersucht. Um Auswirkungen des Klimawandels auf phänologische Prozesse in den verschiedenen Gliedern der Nahrungskette aufzuzeigen, bedarf es langer Zeitreihen zur Populationsentwicklung verschiedener Artengemeinschaften und zum Zustand beziehungsweise zur Veränderung von Ökosystemen sowie eines noch genaueren Verständnisses der Funktion und Rolle bestimmter Arten im Ökosystem. Gleiches gilt für die Veränderung der Struktur und Artenzusammensetzung von Ökosystemen und räumliche Verschiebung der Arten. Bezüglich des Themenbereichs der invasiven Arten fehlt es bisher an einer ausreichenden Datengrundlage, um deren räumliche Verbreitungsschwerpunkte innerhalb Deutschlands und deren Ausbreitung zu identifizieren. Auch zur Bewertung kritischer invasiver Arten hinsichtlich ihrer Auswirkungen zum Beispiel auf die menschliche Gesundheit oder die Land- und Forstwirtschaft gilt es Lücken im Kenntnisstand zu schließen. Nicht

zuletzt fehlt es bislang auch an Forschung zum möglichen Einfluss des Klimawandels auf die genetische Anpassung von Arten über mehrere Generationen hinweg.

#### **8.4.2 Handlungsfeld Boden**

Im Handlungsfeld „Boden“ stellen der Erhalt der Ökosystemleistungen wie Stoffkreisläufe und Wasserspeicher sowie Vermeidung von Bodenerosion vor dem Hintergrund des Klimawandels wichtige, weiter zu intensivierende Forschungsbereiche dar. Umfassender Analysen bedarf es zum Einfluss veränderter klimatischer Bedingungen auf die durch Böden miteinander verbundenen lokalen, regionalen und globalen Stoffkreisläufe und den davon abhängigen Ökosystemen. Auf Grundlage der Ergebnisse der deutschlandweiten Bodenzustandserhebung für landwirtschaftliche Flächen (Thünen Institut, Institut für Agrarklimaschutz) ist Forschung darüber erforderlich, wie mit den veränderten Bedingungen (etwa veränderte Wasser- und Nährstoffverfügbarkeiten infolge zunehmender sommerlicher Trockenheit sowie Auswaschung durch stärkere Herbst- und Winterniederschläge) zum Beispiel im Ackerbau umgegangen und wie bestmögliche Anpassung betrieben werden kann. Außerdem bedarf es erweiterter Kenntnisse zu gekoppelten Modellen zum Niederschlags-, Oberflächenwasser-, Grundwasser- und Bodenwasserhaushalt und der Optimierung der Erkenntnisse im Hinblick auf Klimaszenarien. Hierfür muss der Aufbau eines räumlich weitgreifenden Monitoringnetzes zum Bodenwasserhaushalt angestrebt werden, insbesondere in semiterrestrischen Bereichen und bei Mooren. Verstärkte Monitoringaktivitäten, einschließlich einer bundesweit einheitlichen Erfassungsmethodik, sind auch erforderlich, um den Kenntnisstand zum Erosionsgeschehen im Allgemeinen sowie speziell zum Auftreten von Rutschungen und Muren zu vertiefen. Zur genaueren Modellierung der zukünftigen Entwicklung von (Wasser-)Erosionsrisiken gilt es sowohl die zeitliche Dynamik von Gefügestabilität und Wasserspeicherfähigkeit des Bodens genauer und räumlich expliziter abzubilden als auch hochauflösende Datensätze und Projektionen zum Auftreten und zur Wahrscheinlichkeit von Starkniederschlägen zu entwickeln. Mit Blick auf verstärkt auftretende Trockenheit sind Methoden für einen ausgeglichenen Wasserhaushalt (Grundwasserspeisung, Landschaftswasserhaushalt) weiterzuentwickeln. Weiterer Forschung bedarf es hinsichtlich der Produktionsfunktion, der Speicherfunktion für klimarelevante Gase oder der Kühlfunktion von Böden in Städten. Letzteres beinhaltet differenzierte Analysen der Klimafunktion von Stadtböden unter Berücksichtigung der Einflussfaktoren Flächennutzung, Niederschlag, Wasserspeicherung, woraus auch Erkenntnisse für die Entwicklung von Anpassungsstrategien resultieren könnten. Um das Bewusstsein für die gesellschaftliche Bedeutung gesunder Böden und deren Ökosystemleistungen zu steigern, wäre eine ökonomische Bewertung hilfreich, wenn auch sehr kompliziert. Dafür wären fundierte transdisziplinäre und gut vermittelbare Ansätze zu entwickeln.

#### **8.4.3 Handlungsfeld Landwirtschaft**

Im Handlungsfeld „Landwirtschaft“ besteht sowohl mit Blick auf Nutztiere als auch Nutzpflanzen weiterer Forschungsbedarf zu den Auswirkungen des Klimawandels und Anpassungsmöglichkeiten. Hitzestress beziehungsweise thermoneutrale Zonen von Nutztieren stellen zwar bereits einen Forschungsschwerpunkt dar, so bestehen beispielsweise erste Züchtungsversuche zu hitzetoleranteren Rassen und der Temperatur-Feuchtigkeits-Index (THI) ist zumindest für Milchvieh Stand der Technik. Gleichzeitig berücksichtigt Letzterer aber bestimmte wichtige Parameter nicht (Belüftung, Luftbewegung) und wäre außerdem für andere Arten weiterzuentwickeln (Schweine). Bezüglich Nutzpflanzen ist das Erkenntnisinteresse unter anderem auf die Minderung der Empfindlichkeit gegenüber abiotischem Stress, vor allem Hitze, Frost und Trockenheit, gerichtet. Thematische Schwerpunkte stellen dabei die Optimierung von Anbausystemen, die Verbesserung des Wassermanagements, die Erprobung neuer Technologien und in Deutschland bisher nicht angebaute Arten und Sorten sowie die Züchtung von Nutzpflanzen dar, welche auf

die Eindämmung von Ernteaufgängen infolge des Klimawandels abzielen. Weiterhin bedarf es genauerer Kenntnisse zu den Auswirkungen des Klimawandels sowohl auf die Phänologie von Schaderregern und ihres Schadenspotenzials als auch auf die Etablierung neuer Schaderreger. Forschung zu resistenten Sorten spielt in dieser Hinsicht ebenfalls eine wichtige Rolle. Wissensdefizite existieren außerdem bezüglich der die Qualität von Ernteprodukten betreffenden Wechselwirkungen zwischen erhöhten Kohlenstoffdioxidkonzentrationen, dem Wasserbedarf von Pflanzen, den qualitätsbestimmenden Pflanzeninhaltsstoffen, Hitze- und Trockenperioden sowie steigenden bodennahen Ozonkonzentrationen.

Hinsichtlich Anpassungskapazitäten in der Landwirtschaft bedarf es der Forschung zum Zusammenspiel unterschiedlicher Anpassungsmaßnahmen (Wechselwirkungen, mögliche Synergieeffekte sowie Divergenzen), zum Einfluss agrarpolitischer Entwicklungen auf Anpassungsprozesse und -kapazitäten ebenso wie zu Rückkopplungseffekten über Agrarmärkte. Auch zur Akzeptanz der diversen Anpassungsmaßnahmen im Kontext des Klimawandels sowohl auf betrieblicher als auch auf Nachfrageseite gilt es Wissenslücken durch wissenschaftliche Erkenntnisse zu schließen.

#### **8.4.4 Handlungsfeld Wald- und Forstwirtschaft**

Im Handlungsfeld „Wald- und Forstwirtschaft“ ergibt sich weiterer Forschungsbedarf bezogen auf die Auswirkungen des Klimawandels auf Hitze- und Trockenstress bei Bäumen, Schädlingsbefall und die Implikationen von Extremereignissen. Neben Forschungsarbeiten zu den Folgen des Klimawandels auf deutsche Wälder ist auch die Identifikation von Möglichkeiten zur Anpassung von hoher Bedeutung. So könnte Forschung zu Provenienzen heimischer und gegebenenfalls auch nichtheimischer Baumarten, die weniger hitze- beziehungsweise trockenheitssensitiv sind, wichtige Hinweise für die zukünftige Forstwirtschaft bieten. Im Hinblick auf Schädlingsbefall in Wäldern ist der Buchdrucker, eine Borkenkäfer-Art, bereits gut untersucht. Vergleichbar systematische Untersuchungen von anderen Schädlingen, inklusive der Entwicklung eines entsprechenden Modells und Projektionen zu ihrer zukünftigen Verbreitung in Deutschland, bestehen bisher aber kaum. Gleiches gilt für das Einwanderungs- und Etablierungspotenzial nicht heimischer Schädlinge und Pathogene. Auch zum Thema Windwurf in Wäldern fehlen aktuell noch valide Projektionen zu Sturm- und Starkwindereignissen, um entsprechende Anpassungsmaßnahmen zu generieren. Neben einzelnen Extremereignissen, wie Stürmen, kann auch die Aufeinanderfolge von solchen Ereignissen negative Auswirkungen für die Forstwirtschaft haben. Beispielsweise sind Waldböden nach Starkregen aufgeweicht, wodurch diese Wälder dann eine höhere Sensitivität gegenüber Windwurf aufweisen. Auch kann nach einem Starkwindereignis entstehender Windbruch und das resultierende Sturmholz eine gute Brutstätte für Borkenkäfer sein, die bei darauffolgender Trockenheit die geschwächten Bäume befallen können. Da sich dieses Phänomen aber in bisherigen Klimamodellen kaum abbilden lässt, wäre hier weitere Forschung von Nöten. Auch besteht weiterhin Forschungsbedarf hinsichtlich der Wirkungszusammenhänge unterschiedlicher Stressoren, wie Stoffeinträge und Bewirtschaftungseinflüsse, auf die Waldökosysteme, und dem Ausmaß, in welchem diese den klimawandelbedingten Stress von Waldbäumen verstärken können.

#### **8.4.5 Handlungsfeld Fischerei**

Konkreter Forschungsbedarf im Handlungsfeld „Fischerei“ besteht bezüglich der Auswirkungen steigender Wassertemperaturen auf die Entkopplung von Nahrungsbeziehungen in der Ostsee, wobei sowohl die Entwicklung der Heringsbestände und -rekrutierung als auch die Betroffenheit anderer Fischarten zu berücksichtigen sind. Die Nordsee betreffend könnten die Auswirkungen einwandernder südlicher Arten auf das Ökosystem, vor allem auf heimische Fischarten,

untersucht werden. In Binnengewässern könnte die Kartierung bestehender Fischarten (einschließlich einer Datenbank zu Temperaturansprüchen verschiedener Arten in verschiedenen Lebenszyklusphasen) wichtige Erkenntnisse zu künftigen Klimarisiken liefern. Zu berücksichtigen sind in diesem Zusammenhang auch auf die Landwirtschaft und die Landnutzung am Gewässer zurückzuführende Nährstoffeinträge, die die Sauerstoffsättigung und Nahrungsverfügbarkeit in Gewässern beeinflussen. Beträchtlicher Forschungsbedarf besteht außerdem hinsichtlich schädigungs- und krankheitsbedingten Stresses, sowohl für die natürlich vorkommenden Bestände als auch bei Aquakulturen.

#### **8.4.6 Handlungsfeld Küsten- und Meeresschutz**

Im Handlungsfeld „Küsten- und Meeresschutz“ ergibt sich Forschungsbedarf bezüglich der Ermittlung der Beiträge des grönländischen und antarktischen Eisschildes zum globalen Meeresspiegelanstieg. Hinsichtlich der Auswirkungen des globalen Meeresspiegelanstiegs auf die deutschen Küsten ist die Eingrenzung der Unsicherheiten des regionalen Meeresspiegelanstiegs durch verbesserte Kenntnisse der Ursachen (zum Beispiel Einfluss der Atmosphäre, des regionalen Beitrags des grönländischen und antarktischen Eisschildes, sowie vertikaler Landsenkungen) ein wesentlicher Schritt zu verbesserten Projektionen. Auch weiterführende Forschung zu der Thematik, wie sich das Wattenmeer morphodynamisch entwickeln wird, erscheint notwendig, da bisher noch Unsicherheiten bestehen, ab welcher Meeresspiegelhöhe und in welchem Umfang ein Verlust von Wattflächen eintritt. In diesem Zusammenhang könnte auch die Wirksamkeit naturbasierter Küstenschutzlösungen (wie etwa Sandaufspülungen oder biologisch-technischer Ufersicherungen) betrachtet werden. Zudem bedarf es weiterer Forschung zu den Auswirkungen des Klimawandels auf die Entwässerung des Hinterlands, insbesondere bezüglich des kombinierten Eintretens von Extremwetterereignissen wie aufeinanderfolgende Sturmfluten und Starkregenereignisse in Abhängigkeit bestimmter Wetterlagen.

Forschungsbedarf besteht weiterhin bezüglich der klimawandelbedingten Entwicklung biochemischer Prozesse in den Meeren, insbesondere bezüglich der Ozeanversauerung. Weitere Forschung zur Abbildung des klimatischen Einflusses „Starkwind“ in Klimamodellen könnte zu verbesserten Projektionen für Starkwind-beeinflusste Klimawirkungen, wie zum Beispiel „Sturmfluten“, beitragen.

#### **8.4.7 Handlungsfeld Wasserhaushalt, Wasserwirtschaft**

Viele Wirkzusammenhänge im Handlungsfeld „Wasserhaushalt, Wasserwirtschaft“ sind noch nicht gut genug in Modellen abgebildet und können noch nicht gut genug für die Zukunft projiziert werden. Dies gilt umso mehr je extremer, kleinräumiger und kurzfristiger die betrachteten hydrologische Phänomene sind. Die Entwicklung von hochauflösenden Starkregenszenarien und deren Umsetzung in Sturzflutszenarien ist in diesem Zusammenhang ein wichtiger Baustein für zukünftige Forschungsarbeiten. Weiterer Forschungsbedarf besteht in der Ableitung extremer Hochwasserabflüsse aus Klima- beziehungsweise Abflussprojektionen, insbesondere bezogen auf Aussagen zu Wiederkehrintervallen anpassungsrelevanter Kennwerte und hydrodynamische Wirkungen. Hier sind unter anderem aufgrund aktueller teilweise gemeinsamer Aktivitäten von Bund und Bundesländern in den nächsten Jahren weitere wesentliche Entwicklungen zu erwarten. Weiterhin besteht Forschungsbedarf bezogen auf ein kontinuierliches, flächendeckendes, detailliertes und besser integriertes Monitoring- und Projektionssystem des Wasserhaushalts inklusive Grund- und Bodenwasser, der Wassertemperatur und Wassergüte und ökologischer Subsysteme und Ökosystemleistungen. Ein wichtiger Bestandteil zur Schließung dieser Lücke ist der im Jahr 2020 dauerhaft eingerichtete DAS-Basisdienst „Klima und Wasser“.

Um ein bewusstes Grundwassermanagement zu erreichen, bedarf es einer deutschlandweiten Erfassung der Menge und Qualität des zur Verfügung stehenden Grundwassers und einer Abschätzung der Grundwasserneubildungsraten. In diesem Kontext muss ein enges Messnetz zur Bodenfeuchte aufgebaut werden, um die Datenlage zum Wasserkreislauf zu komplettieren und diesen dezidiert abbilden zu können. Da mit steigenden Lufttemperaturen von einem höheren Bewässerungsbedarf ausgegangen wird, erscheint eine integrierte und regional differenzierte Betrachtung des Themas Bewässerungswasser als Querschnittsthema hilfreich.

#### **8.4.8 Handlungsfeld Bauwesen**

Grundlegend gilt es, das Auftreten von Extremereignissen räumlich und zeitlich präziser darstellen zu können (vor allem Starkregen, Hagel, Sturm, Schneefall, Hitze und UV-Belastung), um darauf aufbauend die Auswirkungen verstärkter Hitze und Trockenheit, intensiveren Starkniederschlags und Sturms auf Gebäude, Quartiere und ganze Stadtregionen genauer zu untersuchen. Gegenwärtige und künftige Risiken wären dabei ebenso herauszuarbeiten wie Strategien zur Minderung der Risiken. Auf diesen Grundlagen ließen sich etwa die Anforderungen an klimaanangepasstes Bauen, einschließlich der Materialwahl, räumlich differenzierter bestimmen.

Beispielsweise bedarf es räumlich und zeitlich hochaufgelöster Niederschlagsprojektionen, welche Überflutungen durch Starkregenereignisse berücksichtigen. Der bereits auf kommunaler Ebene verbreitete Ansatz der Starkregengefahrenkarten könnte – mithilfe der entsprechenden Daten – auf Bundesebene übertragen werden. Die derzeit noch hohen Unsicherheiten bei flusshochwasserverknüpften Schadensmodellierungen ließen sich unter anderem senken, indem Ensembles verschiedener Schadensmodelle gebildet (Figueiredo et al. 2018) und heterogene Daten vergangener Hochwasserereignisse in die Modelle einfließen würden (Wagenaar et al. 2018). Um den Kenntnisstand gebäudespezifischer Daten (bis hin zu Messungen der Innenraumtemperatur und Wärmebelastung) zu verbessern, sind deutlich mehr Gebäude- und Messdaten erforderlich. Dazu könnten verstärkt Simulationen mit dreidimensionalen Stadtklima- und Abflussmodellen eingesetzt und Fernerkundungsdaten genutzt werden (Schröter et al. 2018).

Aktuelle Forschungstätigkeiten befassen sich unter anderem mit der flächendeckenden Erfassung der Grünausstattung aller deutschen Städte mittels Satellitendaten (Sentinel-2), worauf basierend zukünftig ein bundesweites Monitoring von Stadtgrün entwickelt werden soll<sup>31</sup>. Darüber hinaus sind genauere Erkenntnisse zu Wirkbeziehungen zwischen den Auswirkungen gebauter-, grüner und blauer Infrastruktur auf das lokale Klima erforderlich. Aufmerksamkeit ist dabei etwa Konkurrenzsituationen und Zielkonflikten zwischen Klimaanpassungsmaßnahmen, Klimaschutzmaßnahmen und Ressourceneffizienz im Bauwesen sowie möglicher Lösungen solcher Konflikte zu schenken (etwa am Beispiel der CO<sub>2</sub>-Bilanz von Klimaschutz- und -anpassungsmaßnahmen, passiver und aktiver Wärme- und Energieeinsparung, Wärmedämmung oder Kühlfunktionen von Gebäuden). Forschungsbedarf besteht auch hinsichtlich Klimaanpassung in verdichteten Stadtquartieren.

#### **8.4.9 Handlungsfeld Energiewirtschaft**

Angesichts der sich inzwischen sehr rasch vollziehenden Transformation des Energiesystems haben sich die Forschungsbedarfe in diesem Bereich in den letzten Jahren verändert. Einflüsse des Klimawandels auf den Betrieb thermischer Großkraftwerke spielen künftig eine weitaus geringere Rolle. als neuere Forschungsschwerpunkte sind der Zusammenhang zwischen der Nutzung verschiedener Quellen erneuerbarer Energien (insbesondere Wind on-shore und off-shore

---

<sup>31</sup> Siehe auch: <https://www.bbsr.bund.de/BBSR/DE/forschung/programme/refo/staedtebau/2019/gruenmonitoring/01-start.html?nn=2541684#Projektsteckbrief>



sowie Solar) und einzelnen klimatischen Einflüssen sowie die Wechselwirkungen zwischen dem sich ändernden Energiesystem insgesamt und dem Klimawandel zu nennen. Erforderlich werden bessere Projektionen zukünftiger Windgeschwindigkeiten und Sonnenscheindauern, aber auch Prognosen zu Änderungen des Energiebedarfs infolge des Klimawandels (regional, tages- und jahreszeitlich, Energieträger, Gesamtverbräuche). Aufgrund der rückläufigen Nachfrage nach Heizenergie und der steigenden Nachfrage nach Kühlenergie eröffnet sich zudem Forschungsbedarf zu integrativen Systemen für den Heiz- und Kühlbedarf sowie effizienten Möglichkeiten der Bereitstellung von Kühlung. Zudem bedarf es Kenngrößen für das Kühlen und Heizen, die einen funktionalen Zusammenhang zum nutzungs- und gebäudespezifischen Energieverbrauch aufweisen.

#### **8.4.10 Handlungsfeld Verkehr, Verkehrsinfrastruktur**

Im Handlungsfeld „Verkehr, Verkehrsinfrastruktur“ ergibt sich weiterer Forschungsbedarf jeweils beim Straßen-, Schienen- und Schiffsverkehr sowie in einer verstärkt verkehrsträgerübergreifenden Sichtweise mit Blick auf kurz- und langfristige Verlagerungspotenziale bei extremwetterbedingten Beeinträchtigungen eines Verkehrsträgers.

Um die Schiffbarkeit der Binnenschiffahrtsstraßen auch zukünftig sicherstellen zu können, ergibt sich verstärkter Forschungsbedarf zur Ableitung extremer Hochwasserabflüsse aus Klima- beziehungsweise Abflussprojektionen sowie zu den volkswirtschaftlichen Kosten (ganzheitliche Kostenbetrachtungen) infolge anhaltender Niedrigwasserperioden.

An den Seeschiffahrtsstraßen besteht insbesondere bei der Bewertung des Zusammenspiels von Meeresspiegelanstieg und der morphologischen Entwicklung in den Ästuaren Forschungsbedarf. Die Unterhaltung (Sedimentmanagement) der Seehafenzufahrten ist primär von den Auswirkungen eines steigenden Meeresspiegels (Tidedynamik, Stofftransport), aber auch von langanhaltenden Niedrigwasserperioden im Binnenbereich betroffen (Stofftransport). Hier fehlen insbesondere quantitative Aussagen hinsichtlich der Auswirkungen auf den Schwebstofftransport in Ästuaren und der Entwicklung von Baggermengen in den deutschen Seehafenzufahrten.

Bezogen auf die Auswirkungen des Klimawandels auf den Schienenverkehr besteht Bedarf nach weiterführender Forschung zu den Sensitivitätsfaktoren von Schäden an Schienenwegen, insbesondere hinsichtlich der Höhenlage der Gleiskörper, die durch Hochwasser beeinträchtigt werden könnten sowie für Windbrüche besonders sensibler Vegetation in der Nähe von Oberleitungen. Auch im Straßenverkehr bestehen noch Wissenslücken zur Sensitivität von Straßenabschnitten gegenüber gravitativen Massenbewegungen und Hochwasserereignissen. Hier bedarf es vor allem flächendeckender Daten zur Höhenlage der Fahrbahnen sowie Daten zu Wasserspiegellagen, die sich bei extremen Hochwasserereignissen unter Klimawandeleinfluss ergeben.

#### **8.4.11 Handlungsfeld Industrie und Gewerbe**

Ein zentraler Forschungsbedarf für das Handlungsfeld „Industrie und Gewerbe“ ist Forschung zu verwendeten Rohstoffen, speziell solchen, die beinahe ausschließlich in hochvulnerablen Ländern vorkommen. Dabei geht es um die Entwicklung von alternativen Technologien oder Substituten, aber auch um Forschung zu neuen Recycling- und Rückgewinnungsprozessen für derartige Stoffe (BMW 2019; BMU 2020).

Forschungsbedarf ergibt sich zudem zu passgenauen Klimaberatungsdienstleistungen für verschiedene Branchen und Unternehmensgrößen. Diese sollten nicht nur die Folgen des Klimawandels für deutsche Standorte berücksichtigen, sondern im Rahmen der globalen Vernetzung

auch die Auswirkungen auf andere relevante Standorte der jeweiligen Lieferketten. Auch besteht Forschungsbedarf hinsichtlich der Verknüpfung der Analyse von Klimarisiken mit neuen Berichtspflichten von Unternehmen im Zuge sich verändernder EU-Regularien.

Ferner besteht im Handlungsfeld Bedarf für die verstärkte Erforschung von zukünftigen Wettbewerbsvorteilen innovativer Anpassungstechnologien. Dies betrifft insbesondere längerfristige Reaktionsmöglichkeiten auf einen stärkeren Klimawandel.

#### **8.4.12 Handlungsfeld Tourismuswirtschaft**

Mit Blick auf den Forschungsbedarf zu den Folgen des Klimawandels in der Tourismuswirtschaft stellt die genauere Untersuchung der Multikausalität von Reiseentscheidungen in Deutschland ein wichtiges Thema dar. Darauf basierend ließe sich die Identifizierung von Klimaanpassungsmaßnahmen verbessern. So wäre es für die Tourismuswirtschaft wertvoll, ein genaueres Verständnis davon zu haben, wann der Wegfall eines touristischen Angebots dazu führt, dass Touristen einer Destination fernbleiben und unter welchen Umständen, beispielsweise aufgrund anderer Angebote am selben Ort, Destinationen weiterhin aufgesucht werden. Besonderes Augenmerk ist dabei auf die Vielzahl individueller und sozioökonomischer Faktoren zu richten, die Reiseentscheidungen beeinflussen. Eng mit dieser Fragestellung verknüpft ist die Quantifizierung klimabedingter räumlicher Nachfrageverlagerungen, um diese besser einordnen zu können. Langfristige Klimaveränderungen können zu zeitlichen oder räumlichen Verlagerungen der Nachfrage, aber auch zu Verschiebungen der Nachfrage zwischen verschiedenen touristischen Segmenten führen. Auch eine Kombination dieser drei Verlagerungsmöglichkeiten kann sich ergeben. Aufgrund des komplexen Wirkungsgefüges von zugrunde liegenden Faktoren liegen solche Quantifizierungen bisher nicht vor.

#### **8.4.13 Handlungsfeld Menschliche Gesundheit**

Hinsichtlich der Zusammenhänge zwischen menschlicher Gesundheit und den Folgen des Klimawandels stellen Hitzebelastung, Allergien, UV-Strahlungsbelastung, Mikroorganismen und Vektoren wichtige Forschungsbereiche dar. Obwohl bereits durch aktuelle Forschung aufgegriffen, bestehen weiterhin offene Fragen bezüglich der Bewertung der thermischen Belastung für die Bevölkerung in Städten, insbesondere an sozial(räumlich) differenzierten Analysen mangelt es bisher. Wichtig wären Echtzeitdaten für eine schnelle Registrierung hitzeassoziierten Erkrankungen ebenso wie eine bundesweit möglichst kleinräumige Erfassung der hitzebedingten Übersterblichkeit. Überdies wären Untersuchungen mit Fokus auf zeitliche Parameter von Hitzewellen hilfreich (also beispielsweise deren Auftreten außerhalb des Zeitraums Juni bis August oder deren plötzliches Auftreten nach kühleren Phasen), um Risiken für die menschliche Gesundheit besser einschätzen zu können.

Für die Abschätzung der Exposition gegenüber neuen oder sich ausbreitenden Allergenquellen im Zuge des Klimawandels sollte ein repräsentatives kontinuierliches Sensibilisierungsmonitorings zu klimaassoziierten Allergenen beim Menschen über die Bestimmung allergenspezifischer IgE-Antikörper im Blutserum/Nasensekret erfolgen. Dies ermöglicht aktuelle Einschätzungen und zeitliche Trendanalysen. Um speziell den Kenntnisstand zu allergischen Reaktionen durch Aeroallergene pflanzlicher Herkunft vor dem Hintergrund des Klimawandels zu vertiefen, bedarf es der Entwicklung von Blühbeginnmodellen zu weiteren allergenen Pflanzen sowie der Verbesserung existierender Modelle (Hasel und Erle), die bisher zum Teil die zunehmende Variabilität des Blühbeginns noch nicht ausreichend abbilden. Auch in der Modellierung der Länge der Pollensaison wäre ein wichtiger Forschungsfortschritt zu sehen, ebenso wie in der Definition (entsprechend des europäischen Standards) der Pollensaison für weitere allergene Pollenarten (Hasel, Erle) und in der Bestimmung des Allergengehalts invasiver oder fremdländischer Arten (die

beispielsweise zu Anpassungszwecken Verwendung finden). Darüber hinaus mangelt es bisher an Kenntnissen zu den genauen Zusammenhängen zwischen dem Auftreten von Pollenallergiesymptomen, der Lufttemperatur und Luftschadstoffen wie Ozon.

Ein hoher Forschungsbedarf besteht überdies hinsichtlich der psychischen Auswirkungen von durch Klimawandel bedingten Extremereignissen (beispielsweise Krankheitsbilder wie Posttraumatische Belastungsstörungen, Depression). Dies kann zum Beispiel Schäden an oder Verluste von Gütern, Eigentum, Gesundheit und Leben betreffen (Erkrankungen, Unfälle, Verletzungen, Verlust von Angehörigen), die beispielsweise durch außergewöhnliche Hochwasser oder Überschwemmungen eintreten oder durch mögliche Binnenmigration zustande kommt, wenn Menschen infolge von unter anderem klimawandelbedingten Extremereignissen obdachlos oder einzelne Regionen unbewohnbar werden.

Auch hinsichtlich der aktuellen und künftigen UV-Strahlungsbelastung bestehen noch deutliche Wissensdefizite. Zum einen gilt es, die aktuell und in den letzten Jahrzehnten durch bodengestützte Messungen in Deutschland erhobenen UV-Strahlungsdaten der Wissenschaft für Auswertungen zugänglich zu machen. Aufbauend auf deren Analyse wären die Wirkzusammenhänge zwischen UV-Bestrahlungsstärke, stratosphärischem Ozon, Aerosolen und Bewölkung und der erdbodennahen Strahlungsbelastung zu modellieren und für die Zukunft zu projizieren (für Deutschland). Einen wichtigen Forschungsgegenstand in diesem Zusammenhang stellen Niedrigozonereignisse und deren zunehmende Häufigkeit dar, da hier der hypothetisch hergestellte Zusammenhang mit dem Klimawandel wissenschaftlich abzuklären ist. Zum anderen sind wetterabhängige Verhaltensgewohnheiten als entscheidender Faktor für die tatsächliche UV-Strahlungsbelastung genau in den Blick zu nehmen. Zu erforschen wäre diesbezüglich, inwieweit klimawandelbedingte Veränderungen des Wetters Verhaltensgewohnheiten beeinflussen und inwieweit sie die Wahrscheinlichkeit für Überbelastungen durch UV-Strahlung erhöhen (Leitlinienprogramm Onkologie 2021).

Der wissenschaftlichen Bearbeitung bedürfen außerdem offene Fragen bezüglich des Pathogenitätspotenzials von Vibrionen im VBNC-Zustand<sup>32</sup> oder des Zusammenhangs zwischen Vibrionenaktivität, Wassertemperatur, Salzgehalt und Zooplankton. Auch um räumlich und zeitlich (zukunftsbezogen) genauere Angaben zum Vorkommen beziehungsweise zur Populationsstärke, zum Vektorpotenzial und zur Erregerdurchseuchung potenzieller Krankheitsüberträger, etwa Zecken, Stechmücken (wie die Asiatische Tigermücke) oder Nagetieren vor dem Hintergrund des Klimawandels machen zu können, bedarf es weiterer Forschungsarbeit. In diesem Zusammenhang ist ein gezieltes und systematisches Monitoring der Vektoren zentral, um die Einschätzung potenzieller Risiken für den Menschen durch vektorübertragene Erreger zu erleichtern. Weitere Forschungsaktivitäten sollten Maßnahmen zur Verhinderung von vektorübertragbaren Infektionen gewidmet werden, unter anderem mithilfe der Entwicklung von Impfstoffen für klimawandelbedingt neu oder stärker verbreitete (vektorübertragene) Infektionskrankheiten.

Schließlich sind hinsichtlich der Auswirkungen des Klimawandels auf das Gesundheitssystem noch etliche Fragen offen, die der systematischen wissenschaftlichen Klärung bedürfen, unter anderem zu den ökonomischen Folgen für das Gesundheitssystem.

---

<sup>32</sup> Lebend, aber nicht kultivierbar („viable but non-culturable“).

## 9 Schlussbetrachtung

Autor: Walter Kahlenborn | adelphi, Berlin

Die KWRA 2021 hat eine große Bandbreite von Ergebnissen erbracht. Durch die Untersuchung konnte sowohl das Verständnis für künftige Klimarisiken deutlich verbessert als auch das Wissen zu Möglichkeiten und Grenzen von Anpassung an den Klimawandel erheblich erweitert werden.

Der in der KWRA 2021 gewählte methodische Ansatz, insbesondere der Schwerpunkt auf einer qualitativ orientierten Herangehensweise und die Kombination von fachlicher Analyse und normativer Bewertung, hat sich bewährt. Dieser Ansatz war hilfreich für die Identifizierung und Priorisierung von Klimarisiken und Handlungserfordernissen. Zudem konnten viele der ursprünglich angestrebten methodischen Verbesserungen gegenüber der VA 2015 umgesetzt werden, insbesondere bei der Bewertung der Anpassungskapazität und der Charakterisierung der Handlungserfordernisse. Dies hat zu einer Präzisierung, Ausdifferenzierung und Erweiterung der Ergebnisse geführt, was für die weitere Anpassungsplanung zahlreiche Vorteile bringt.

Die Erfolge der KWRA 2021 dokumentieren sich aber nicht alleine in den unmittelbaren Ergebnissen und in den sechs Teilberichten. Wichtig ist auch, dass die Untersuchung die Zusammenarbeit der beteiligten Bundesbehörden und -institutionen verstärkt hat. Das gemeinsame Verständnis mit Blick auf die Auswirkungen des Klimawandels wurde gefördert und aus der KWRA 2021 heraus ergaben sich neue Anstöße zur Kooperation zwischen einzelnen Netzwerkpartnern mit Blick auf die Bearbeitung spezifischer Fachfragen. Schon vor dem Start der Arbeiten an der KWRA 2021 und auch im Verlauf der Untersuchung ist das Behördennetzwerk „Klimawandel und Anpassung“ weiter angewachsen. Während an der VA 2015 noch 16 Netzwerkpartner mitgewirkt haben, waren es bei der KWRA 2021 25 aktive Netzwerkpartner. Die KWRA 2021 konnte damit auf ein deutlich breiteres und diversifizierteres Expertenwissen zurückgreifen.

Das Behördennetzwerk bietet jetzt institutionell eine gute Grundlage, um die Ergebnisse der Untersuchung behördenübergreifend weiterzuverfolgen. Wenn der Austausch des Netzwerks mit anderen relevanten Akteuren zukünftig weiter intensiviert und deren Anbindung an das Netzwerk gefördert würde, könnte dies die Basis für künftige Klimarisikoanalysen noch weiter verbessern. Dies betrifft insbesondere, aber nicht ausschließlich, das Zusammenspiel mit den Bundesländern.

Im Kontext der Auswertung und Weiterverfolgung der Ergebnisse der KWRA 2021 sowie mit Blick auf die Vorbereitung künftiger Klimarisikoanalysen sind vor allem fünf Themen von größter Bedeutung, denen sich das Behördennetzwerk in der Zukunft widmen könnte:

1. Die KWRA 2021 hat gezeigt, dass bei einigen Klimawirkungen gegebenenfalls schon zur Mitte des Jahrhunderts absolute und relative Grenzen der Anpassung erreicht werden. Bei vielen weiteren besteht die Gefahr, dass sie bis zum Ende des Jahrhunderts an solche Grenzen stoßen. Die Möglichkeiten der weiterreichenden Anpassung sind bei diversen Klimawirkungen begrenzt. Die weiterreichende Anpassung scheint hier nur eine geringe Senkung der künftigen Klimarisiken bewirken zu können. Vor diesem Hintergrund ist es ratsam, sich mit alternativen Konzepten auseinanderzusetzen und sich sowohl in der Forschung als auch im öffentlichen Diskurs stärker auch Fragen einer tiefergreifenden Anpassung zu widmen. Hierzu ist es allerdings erforderlich, dass zunächst ein gemeinsames Verständnis dazu geschaffen wird, was unter einer tiefgreifenden oder transformati-

von Anpassung zu verstehen ist. Bislang gibt es hierzu ein sehr unterschiedliches Verständnis in der wissenschaftlichen Literatur, aber auch zwischen den verschiedenen Netzwerkpartnern. Um gemeinsam Fortschritte in Richtung einer tiefgreifenden oder transformativen Anpassung zu machen, sind zunächst konzeptionelle Erörterungen zu dem Thema sinnvoll.

2. Die große Bedeutung von Wirkbeziehungen zwischen einzelnen Klimawirkungen, aber auch zwischen Handlungsfeldern und Systembereichen konnte in der KWRA 2021 deutlich gemacht werden. Die frühzeitige Einbeziehung von vorgelagerten Klimawirkungen hat zu einem besseren Verständnis der Wirkbeziehungen in den Wirkungsketten geführt. Gleichzeitig ergibt sich aus der KWRA 2021, dass diese Wirkbeziehungen noch stärker und noch systematischer in künftige Klimarisikoanalysen einfließen sollten. So wäre hilfreich, genau zu erheben, welche Bedeutung vorgelagerte Klimawirkungen im Einzelnen haben, inwiefern sie sich auf die nachgelagerten Klimawirkungen auswirken (zum Beispiel linear oder in Form von Sprungfunktionen) und ob Verzögerungseffekte zum Tragen kommen. Auch ist sicherzustellen, dass tatsächlich alle vorgelagerten Klimawirkungen erfasst werden. Auf diese Weise könnten dann Kaskadeneffekte exakt nachgezeichnet werden und es könnten Handlungserfordernisse, die sich aus solchen Kaskadeneffekten heraus ergeben, eindeutiger benannt werden.
3. Eine methodische Optimierung künftiger Klimarisikoanalysen sollte sich auch die bessere Nutzung für und Anbindung an die Anpassungsplanung zum Ziel machen. So gibt es verschiedene Optimierungsmöglichkeiten mit Blick auf die Analyse und Bewertung von Anpassungskapazität (zum Beispiel bei der Einschätzung von Beiträgen einzelner Anpassungsdimensionen). Eine mögliche Herangehensweise wäre, rückwärts denkend zu überlegen, welche Eingangsinformationen idealerweise für die Anpassungsplanung zur Verfügung stehen sollten, um davon ausgehend die konkreten Fragestellungen und das methodische Vorgehen der nächsten Klimarisikoanalyse zu überarbeiten.
4. Ein weiterer Schwerpunkt der Weiterentwicklung von künftigen Klimarisikoanalysen könnte in der stärkeren räumlichen Differenzierung der Aussagen liegen. Während die VA 2015 mit ihrem eher indikatorbasierten Ansatz noch häufiger Kartendarstellungen ermöglichte, war dies im Rahmen der eher qualitativ ausgerichteten Analyse der KWRA 2021 schwieriger. Eine räumliche Differenzierung erfolgt hier vor allem textlich sowie in einigen ausgewählten Fällen über beigefügte Karten. In Zukunft könnten Kartendarstellungen wieder eine größere Rolle spielen. Hierbei kann eine Ausweitung der Zusammenarbeit mit den Bundesländern und gegebenenfalls auch mit Kommunen einen wichtigen Beitrag leisten. Auch vermehrte exemplarische Darstellungen könnten hier das Verständnis für räumliche Differenzierungen verbessern.
5. Ein letzter, grundsätzlich hervorzuhebender Punkt für künftige Arbeiten zu Klimarisiken in Deutschland ist die handlungsfeldübergreifende Vergleichbarkeit der Ergebnisse. Über verschiedene methodische Ansätze wurde im Rahmen der KWRA 2021 die handlungsfeldübergreifende Vergleichbarkeit gefördert. Der intensive Austausch der Netzwerkpartner zu den unterschiedlichen Klimarisiken im Rahmen der Untersuchung, aber auch schon im Kontext der VA 2015, hat dazu beigetragen, dass gemeinsame fachliche Grundlagen und ein ähnliches Verständnis bei der Abschätzung von Klimarisiken zu Grunde gelegt wurden. Um die handlungsfeldübergreifende Vergleichbarkeit noch weiter zu stärken, gibt es jedoch weitere methodische Optionen, etwa in Form einer klaren Festlegung von Bewertungskategorien oder von Schwellenwerten. Im Rahmen der KWRA 2021 waren solche Ansätze aus verschiedenen Gründen nicht möglich. Bei zu-



künftigen Klimarisikoanalysen sollte diese Fragestellung allerdings noch einmal aufgeworfen werden und es sollten mögliche Ansatzpunkte frühzeitig im Kreis des gesamten Behördennetzwerks diskutiert werden.

## Quellenverzeichnis

- Adger, W. N.; Brown, I.; Surminski, S. (2018): Advances in risk assessment for climate change adaptation policy. *Philosophical transactions. Series A, Mathematical, physical, and engineering sciences* 376 (2121). doi:10.1098/rsta.2018.0106.
- Agard, J.; Schipper, L.; Birkmann, J.; Campos, M.; Dubeux, C.; Nojiri, Y.; Olsson, L.; Osman-Elasha, B.; Pelling, M.; Prather, M. J.; Rivera-Ferre, M.; Ruppel, O. C.; Sallenger, A.; Smith, K. R.; St. Clair, A. L. (2014): Annex II: Glossary. In: Intergovernmental Panel on Climate Change (IPCC) (Hrsg.) *Climate Change 2014: Impacts, Adaptation, and Vulnerability. Part A: Global and Sectoral Aspects. Contribution of Working Group II to the Fifth Assessment Report of the Intergovernmental Panel on Climate Change*. Cambridge, United Kingdom and New York, NY, USA. S. 1757–1776.
- Ahlhelm, I.; Frerichs, S.; Hinzen, A.; Noky, B.; Simon, A.; Riegel, C.; Trum, A.; Altenburg, A.; Janssen, G.; Rubel, C. (2020): *Praxishilfe – Klimaanpassung in der räumlichen Planung. Raum- und fachplanerische Handlungsoptionen zur Anpassung der Siedlungs- und Infrastrukturen an den Klimawandel*. Umweltbundesamt (UBA), Dessau-Roßlau.
- Basen, T.; Brinker, A. (2019): Folgen des Klimawandels in den Fließgewässern. *Arbeiten des Deutschen Fischereiverbandes e.V.* (98), S. 45–69.
- Bayerische Landesanstalt für Weinbau und Gartenbau (LWG) (Hrsg.) (2018): "Projekt Stadtgrün 2021". Selektion, Anzucht und Verwendung von Gehölzen unter sich ändernden klimatischen Bedingungen. Abschlussbericht zum Forschungsvorhaben Nr. KL/17/03., Veitshöchheim.
- Brienen, S.; Walter, A.; Brendel, C.; Fleischer, C.; Ganske, A.; Haller, M.; Helms, M. (2020): Klimawandelbedingte Änderungen in Atmosphäre und Hydrosphäre: Schlussbericht des Schwerpunktthemas Szenarienbildung (SP-101) im Themenfeld 1 des BMVI-Expertenetzwerks. Bundesministerium für Verkehr und digitale Infrastruktur (BMVI), Berlin. doi:10.5675/ExpNBS2020.2020.02.
- Bröcker, C.; Habener, A.; te Molder, A.; Philippi, S.; Schwarz, S. (2011): *Entwicklungsstrategien für den Biotopverbund im Grünland unter Berücksichtigung des Klimawandels. Endbericht. Klimaanpassung in Mittel- und Südhessen (KLAMIS)*.
- Bund/Länder-Arbeitsgemeinschaft Wasser (LAWA) (Hrsg.) (2017): *Auswirkungen des Klimawandels auf die Wasserwirtschaft. Bestandsaufnahme, Handlungsoptionen und strategische Handlungsfelder. LAWA-Experten-Gruppe "Auswirkungen des Klimawandels auf die Wasserwirtschaft"*, Berlin.
- Bundesamt für Bevölkerungsschutz und Katastrophenhilfe (BBK) (Hrsg.) (2015): *Risikoanalyse im Bevölkerungsschutz. Ein Stresstest für die Allgemeine Gefahrenabwehr und den Katastrophenschutz. Praxis im Bevölkerungsschutz 16*, Bonn.
- Bundesamt für Umwelt (BAFU) (Hrsg.) (2017): *Klimabedingte Risiken und Chancen. Eine schweizweite Synthese*, Bern.
- Bundesministerium für Umwelt, Naturschutz und nukleare Sicherheit (BMU) (Hrsg.) (2020): *Deutsches Ressourceneffizienzprogramm III 2020-2030. Programm zur nachhaltigen Nutzung und zum Schutz der natürlichen Ressourcen*, Berlin.
- Bundesministerium für Wirtschaft und Energie (BMWi) (Hrsg.) (2019): *Nationale Industriestrategie 2030. Strategische Leitlinien für eine deutsche und europäische Industriepolitik*, Berlin.
- Bundesregierung (Hrsg.) (2015): *Fortschrittsbericht zur Deutschen Anpassungsstrategie an den Klimawandel*.
- Buth, M.; Kahlenborn, W.; Greiving, S.; Fleischhauer, M.; Zebisch, M.; Schneiderbauer, S.; Schausser, I. (2017): *Leitfaden für Klimawirkungs- und Vulnerabilitätsanalysen*. Umweltbundesamt (UBA), Dessau-Roßlau.

- Buth, M.; Kahlenborn, W.; Savelsberg, J.; Becker, N.; Philip, B.; Bubeck, P.; Kabisch, S.; Kind, C.; Tempel, A.; Tucci, F.; Greiving, S.; Fleischhauer, M.; Lindner, C.; Lückenötter, J.; Schonlau, M.; Schmitt, H.; Hurth, F.; Othmer, F.; Augustin, R.; Becker, D.; Abel, M.; Bornemann, T.; Steiner, H.; Zebisch, M.; Schneiderbauer, S.; Kofler, C. (2015): Vulnerabilität Deutschlands gegenüber dem Klimawandel. Umweltbundesamt (UBA), Dessau-Roßlau.
- Couteaux, M.-M.; Bolger, T. (2000): Interactions between atmospheric CO<sub>2</sub> enrichment and soil fauna. *Plant and Soil* 224, S. 123–134.
- Cubasch, U.; Meehl, G. A.; Boer, G. J.; Stouffer, R. J.; Dix, M.; Noda, A.; Senior, C. A.; S; Raper, Y. K. S. (2001): Projections of Future Climate Change. In: J. T. Houghton, Y. Ding, D. J. Griggs, M. Noguer, P. J. van der Linden, X. Dai, K. Maskell, C. A. Johnson (Hrsg) *Climate Change 2001: The Scientific Basis. Contribution of Working Group I to the Third Assessment Report of the Intergovernmental Panel on Climate Change*. S. 525–582.
- European Environment Agency (EEA) (Hrsg.) (2017): *Climate change, impacts and vulnerability in Europe 2016. An indicator-based report*. EEA Report 1, Luxembourg. doi:10.2800/534806.
- European Environment Agency (EEA) (2018): *National climate change vulnerability and risk assessments in Europe, 2018*. EEA Report 1/2018.
- Figueiredo, R.; Schröter, K.; Weiss-Motz, A.; Martina, M. L. V.; Kreibich, H. (2018): Multi-model ensembles for assessment of flood losses and associated uncertainty. *Nat. Hazards Earth Syst. Sci.* 18 (5), S. 1297–1314. doi:10.5194/nhess-18-1297-2018.
- Flato, G.; Marotzke, J.; Abiodun, B.; Braconnot, P.; Rummukainen, M. (2013): Evaluation of Climate Models. In: Intergovernmental Panel on Climate Change (IPCC) (Hrsg) *Climate Change 2013: The Physical Science Basis. Contribution of Working Group I to the Fifth Assessment Report of the Intergovernmental Panel on Climate Change*. Cambridge, United Kingdom and New York, NY, USA.
- Ford, J. D.; Kesikitalo, E. C. H.; Smith, T.; Pearce, T.; Berrang-Ford, L.; Duerden, F.; Smit, B. (2010): Case study and analogue methodologies in climate change vulnerability research. *WIREs Clim Change* 1 (3), S. 374–392. doi:10.1002/wcc.48.
- Fritzsche, K.; Schneiderbauer, S.; Bubeck, P.; Kienberger, S.; Buth, M.; Zebisch, M.; Kahlenborn, W. (2014): *The Vulnerability Sourcebook. Concept and guidelines for standardised vulnerability assessments*. Deutsche Gesellschaft für Internationale Zusammenarbeit GmbH (GIZ), Bonn, Eschborn.
- Grime, M. M.; Wright, G. (2014): Delphi Method. In: N. Balakrishnan, T. Colton, B. Everitt, W. W. Piegorsch, F. Ruggeri, J. L. Teugels (Hrsg) *Wiley StatsRef. Statistics reference online*. Hoboken, NJ. S. 1–6. doi:10.1002/9781118445112.stat07879.
- Hänsel, S.; Brendel, C.; Fleischer, C.; Ganske, A.; Haller, M.; Helms, M.; Jensen, C.; Jochumsen, K.; Möller, J.; Krähenmann, S.; Nilson, E.; Rauthe, M.; Rasquin, C.; Rudolph, E.; Schade, N.; Stanley, K.; Wachler, B.; Deutschländer, T.; Tinz, B.; Walter, A.; Winkel, N.; Krahe, P.; Höpp, S. (2020): Vereinbarungen des Themenfeldes 1 im BMVI-Expertenetzwerk zur Analyse von klimawandelbedingten Änderungen in Atmosphäre und Hydrosphäre. doi:10.5675/EXPNHS2020.2020.01.
- Hausfather, Z.; Peters, G. P. (2020): RCP8.5 is a problematic scenario for near-term emissions. *PNAS* 117 (45), S. 27791–27792. doi:10.1073/pnas.2017124117.
- HM Government (Hrsg.) (2017): *UK climate change risk assessment 2017*. Presented to Parliament pursuant to Section 56 of the Climate Change Act 2008, London.
- Hübener, H.; Bülow, K.; Fooker, C.; Früh, B.; Hoffmann, P.; Höpp, S.; Keuler, K.; Menz, C.; Mohr, V.; Radtke, K.; Ramthun, H.; Spekat, A.; Steger, C.; Toussaint, F.; Warrach-Sagi, K.; Woldt, M. (2017): *ReKliEs-De Ergebnisbericht*. Bundesministerium für Bildung und Forschung (BMBF). doi:10.2312/WDCC/REKLIESDE\_ERGEBNISBERICHT.

- Intergovernmental Panel on Climate Change (IPCC) (Hrsg.) (2013): *Climate Change 2013: The Physical Science Basis. Contribution of Working Group I to the Fifth Assessment Report of the Intergovernmental Panel on Climate Change*. Cambridge University Press, Cambridge, United Kingdom and New York, NY, USA.
- International Energy Agency (IEA); Organisation for Economic Cooperation and Development (OECD) (Hrsg.) (2018): *The Future of Cooling. Opportunities for energie - efficient air conditioning*.
- Klein, R. J.; Midgley, G. F.; Preston, B. L.; Alam, M.; Berkhout, F.; Dow, K.; Shaw, M. R. (2014): *Adaptation Opportunities, Constraints, and Limits Climate Change 2014: Impacts, Adaptation, and Vulnerability. Part A: Global and Sectoral Aspects. Contribution of Working Group II to the Fifth Assessment Report of the Intergovernmental Panel on Climate Change*. S. 899–943.
- Knieling, J.; Kretschmann, N.; Zimmermann, T. (2013): *Regionalplanerische Festlegungen zur Anpassung an den Klimawandel. Neopolis working papers; urban and regional studies 14. Bundesministerium für Bildung und Forschung (BMBF), Hamburg*.
- Knieling, J.; Reitzig, F.; Zimmermann, T. (2018): *Der Regionalplan und die Klimaanpassung. RaumPlanung*, S. 61–65.
- Leitlinienprogramm Onkologie (Hrsg.) (2021): *S3-Leitlinie Prävention von Hautkrebs. Langversion 2.0 AWMF Registernummer: 032/052OL. (Deutsche Krebsgesellschaft, Deutsche Krebshilfe, AWMF)*.
- Mathey, J.; Röbber, S.; Lehmann, I.; Bräuer, A.; Goldberg, V.; Kurbjuhn, C.; Westbeld, A. (2011): *Noch wärmer, noch trockener? Stadtnatur und Freiraumstrukturen im Klimawandel. Abschlussbericht zum F+E-Vorhaben (FKZ 3508 821 800) "Noch wärmer, noch trockener? Stadtnatur und Freiraumstrukturen im Klimawandel". Bundesamt für Naturschutz (BfN), Bonn-Bad Godesberg*.
- Meehl, G. A.; Senior, C. A.; Eyring, V.; Flato, G.; Lamarque, J.-F.; Stouffer, R. J.; Taylor, K. E.; Schlund, M. (2020): *Context for interpreting equilibrium climate sensitivity and transient climate response from the CMIP6 Earth system models. Science advances 6 (26), eaba1981. doi:10.1126/sciadv.aba1981*.
- Randall, D. A.; Wood, R. A.; Bony, S.; Colman, R.; Fichefet, T.; Fyfe, J.; Kattsov, V.; Pitman, A.; Shukla, J.; Srinivasan, J.; Stouffer, R. J.; Sumi, A.; Taylor, K. E. (2007): *Climate Models and Their Evaluation. In: S. Solomon, D. Qin, M. Manning, Z. Chen, M. Marquis, K. B. Averyt, M. Tignor, H. L. Miller (Hrsg) Climate Change 2007: The Physical Science Basis. Contribution of Working Group I to the Fourth Assessment Report of the Intergovernmental Panel on Climate Change. Cambridge, United Kingdom and New York, NY, USA*.
- Salamanca, F.; Georgescu, M.; Mahalov, A.; Moustauoui, M.; Wang, M. (2014): *Anthropogenic heating of the urban environment due to air conditioning. J. Geophys. Res. Atmos. 119 (10), S. 5949–5965. doi:10.1002/2013JD021225*.
- Sanchez-Arcilla, A. (2016): *Responses to Coastal Climate Change: Innovative Strategies for High End Scenarios - Adaptation and Mitigation - . Final Project Report. RISES-AM*.
- Schmitt, H. C. (2016): *Klimaanpassung in der Regionalplanung – Eine deutschlandweite Analyse zum Implementationsstand klimaanpassungsrelevanter Regionalplaninhalte. Raumforsch Raumordn 74 (1), S. 9–21. doi:10.1007/s13147-015-0375-2*.
- Schönfeld, P. (2019): *"Klimabäume" - welche Arten können in Zukunft gepflanzt werden? LWF aktuell 2019*.
- Schröter, K.; Lüdtke, S.; Redweik, R.; Meier, J.; Bochow, M.; Ross, L.; Nagel, C.; Kreibich, H. (2018): *Flood loss estimation using 3D city models and remote sensing data. Environmental Modelling & Software 105, S. 118–131. doi:10.1016/j.envsoft.2018.03.032*.
- Schwalm, C. R.; Glendon, S.; Duffy, P. B. (2020): *RCP8.5 tracks cumulative CO2 emissions. PNAS 117 (33), S. 19656–19657. doi:10.1073/pnas.2007117117*.
- Storch, H. von; Meinke, I.; Claußen, M. (Hrsg.) (2018): *Hamburger Klimabericht. Wissen über Klima, Klimawandel und Auswirkungen in Hamburg und Norddeutschland. Springer Spektrum, Berlin*.

Taylor, K. E.; Stouffer, R. J.; Meehl, G. A. (2012): An Overview of CMIP5 and the Experiment Design. *Bulletin of the American Meteorological Society* 93 (4), S. 485–498. doi:10.1175/BAMS-D-11-00094.1.

Umweltbundesamt (UBA) (Hrsg.) (2016): Klimawirkungsketten. Eurac Research; Bosch & Partner GmbH, Dessau-Roßlau.

Umweltbundesamt (UBA) (Hrsg.) (2019a): Monitoringbericht 2019 zur Deutschen Anpassungsstrategie an den Klimawandel. Bericht der Interministeriellen Arbeitsgruppe Anpassungsstrategie der Bundesregierung, Dessau-Roßlau.

Umweltbundesamt (UBA) (Hrsg.) (2019b): Politikanalyse zur Evaluation der Deutschen Anpassungsstrategie an den Klimawandel (DAS). Evaluationsbericht, Dessau.

United Nations Office for Disaster Risk Reduction (UNDRR) (Hrsg.) (2004): Living with risk. A global review of disaster reduction initiatives, Genf.

van Vuuren, D. P.; Edmonds, J.; Kainuma, M.; Riahi, K.; Thomson, A.; Hibbard, K.; Hurtt, G. C.; Kram, T.; Krey, V.; Lamarque, J.-F.; Masui, T.; Meinshausen, M.; Nakicenovic, N.; Smith, S. J.; Rose, S. K. (2011): The representative concentration pathways: an overview. *Climatic Change* 109 (1-2), S. 5–31. doi:10.1007/S10584-011-0148-Z.

Wagenaar, D.; Lüdtke, S.; Schröter, K.; Bouwer, L. M.; Kreibich, H. (2018): Regional and Temporal Transferability of Multivariable Flood Damage Models. *Water Resour. Res.* 54 (5), S. 3688–3703. doi:10.1029/2017WR022233.

Wirth, D. (2019): Fischsterben im Rhein. Es geht um die Rettung der Äsche. *Luzerner Zeitung* 27.06.2019. Download unter <https://www.luzernerzeitung.ch/schweiz/es-geht-um-die-rettung-der-asche-Id.1130788>. Stand: 07.09.2020.

Wyser, K.; van Noije, T.; Yang, S.; Hardenberg, J. von; O'Donnell, D.; Döscher, R. (2020): On the increased climate sensitivity in the EC-Earth model from CMIP5 to CMIP6. *Geosci. Model Dev.* 13 (8), S. 3465–3474. doi:10.5194/gmd-13-3465-2020.

Zartha Sossa, J. W.; Halal, W.; Hernandez Zarta, R. (2019): Delphi method: analysis of rounds, stakeholder and statistical indicators. *FS* 21 (5), S. 525–544. doi:10.1108/FS-11-2018-0095.
